# Supplementary material for: Transcriptome Architecture of Osteoblastic Cells Infected With Staphylococcus aureus Reveals Strong Inflammatory Responses and Signatures of Metabolic and Epigenetic Dysregulation
Source: Front Cell Infect Microbiol. 2022 Apr 7;12:854242. doi: 10.3389/fcimb.2022.854242 (PMC9067450; doi:10.3389/fcimb.2022.854242)
Supplement: Supplementary file 2 [file Table_1.xlsx]

## Sheet: Summary
Summary
Table S1	Differentially expressed genes (DEGs) with -0.3 < log FC < 0.3 and adjusted p-value < 0.05
Table S2	KEGG classification of DEGs
Table S3	GSEA result of GAGE analysis with KEGG database
Table S4	GSEA result of ReactomePA analysis with Reactome database
Table S5	Downregulated DEGs encoding epifactors
Table S6	Upregulated DEGs encoding epifactors
Table S7	GOBP analysis of downregulated DEGs encoding epifactors with DAVID database

## Sheet: Table S1
Ensembl Id	UniProt/SwissProt Accession	Gene Name	Description	Fold Change	log2 Fold Change	p-value	adjusted p-value
ENSG00000173432	P0DJI8	SAA1	serum amyloid A1	1599.72	10.644	8.73975e-24	2.93176e-21
ENSG00000164400	P04141	CSF2	colony stimulating factor 2 (granulocyte-macrophage)	1316.85	10.363	4.37111e-42	5.05057e-39
ENSG00000181617	Q8NFU4	FDCSP	follicular dendritic cell secreted protein	555.331	9.117	5.51141e-12	5.23408e-10
ENSG00000124102	P19957	PI3	peptidase inhibitor 3	491.694	8.942	4.29324e-29	2.23227e-26
ENSG00000103313	O15553	MEFV	Mediterranean fever	410.796	8.682	8.80447e-11	6.91001e-09
ENSG00000115009	P78556	CCL20	chemokine (C-C motif) ligand 20	396.658	8.632	7.9579e-12	7.35593e-10
ENSG00000108342	P09919	CSF3	colony stimulating factor 3	234.278	7.872	5.52059e-09	3.0618e-07
ENSG00000173237	A6NJI1	C11orf86	chromosome 11 open reading frame 86	193.37	7.595	1.20634e-08	6.33571e-07
ENSG00000124875	P80162	CXCL6	chemokine (C-X-C motif) ligand 6	174.858	7.45	4.80654e-72	1.66611e-68
ENSG00000029559	P21815	IBSP	integrin-binding sialoprotein	173.006	7.435	2.02375e-10	1.48728e-08
ENSG00000164488	Q5SW24	DACT2	dishevelled-binding antagonist of beta-catenin 2	147.933	7.209	6.27076e-08	2.75146e-06
ENSG00000169429	P10145	CXCL8	chemokine (C-X-C motif) ligand 8	134.939	7.076	3.45839e-10	2.42181e-08
ENSG00000129988	P18428	LBP	lipopolysaccharide binding protein	128.367	7.004	3.77574e-09	2.19351e-07
ENSG00000137033	O95760	IL33	interleukin 33	119.353	6.899	3.06851e-13	3.50654e-11
ENSG00000198074	O60218	AKR1B10	aldo-keto reductase family 1, member B10 (aldose reductase)	117.852	6.881	4.29916e-07	1.52844e-05
ENSG00000108688	P80098	CCL7	chemokine (C-C motif) ligand 7	99.498	6.637	1.61389e-08	8.08813e-07
ENSG00000101017	P25942	CD40	CD40 molecule, TNF receptor superfamily member 5	98.557	6.623	6.33749e-24	2.19678e-21
ENSG00000019169	Q9UEW3	MARCO	macrophage receptor with collagenous structure	92.7	6.535	1.36065e-05	0.00030894
ENSG00000178172	Q6UWN8	SPINK6	serine peptidase inhibitor, Kazal type 6	84.771	6.405	3.53259e-12	3.43321e-10
ENSG00000128917	Q9NR61	DLL4	delta-like 4 (Drosophila)	81.219	6.344	7.61205e-43	9.89472e-40
ENSG00000162366	Q13113	PDZK1IP1	PDZK1 interacting protein 1	78.582	6.296	2.61359e-44	3.88268e-41
ENSG00000188257	P14555	PLA2G2A	phospholipase A2 group IIA	75.845	6.245	0.000261522	0.00352276
ENSG00000093134	Q9NY84	VNN3	vanin 3	62.984	5.977	2.84486e-37	2.46531e-34
ENSG00000088926	P03951	F11	coagulation factor XI	57.463	5.845	6.70596e-05	0.00114508
ENSG00000140379	Q16548	BCL2A1	BCL2-related protein A1	57.141	5.836	2.86516e-09	1.71234e-07
ENSG00000267909	Q9NQR7	CCDC177	coiled-coil domain containing 177	56.802	5.828	1.94174e-05	0.00041505
ENSG00000131737	O76011	KRT34	keratin 34, type I	56.225	5.813	2.10246e-16	3.36361e-14
ENSG00000006210	P78423	CX3CL1	chemokine (C-X3-C motif) ligand 1	54.229	5.761	1.41843e-06	4.36398e-05
ENSG00000117594	P28845	HSD11B1	hydroxysteroid (11-beta) dehydrogenase 1	53.218	5.734	1.68109e-05	0.000369201
ENSG00000176049	Q96AA8	JAKMIP2	janus kinase and microtubule interacting protein 2	50.832	5.668	3.07174e-05	0.000601563
ENSG00000134339	P0DJI9	SAA2	serum amyloid A2	48.93	5.613	6.15121e-06	0.000157553
ENSG00000169245	P02778	CXCL10	chemokine (C-X-C motif) ligand 10	48.415	5.597	6.72336e-13	7.39854e-11
ENSG00000166920	Q9C002	C15orf48	chromosome 15 open reading frame 48	47.334	5.565	1.68424e-28	8.34021e-26
ENSG00000047457	P00450	CP	ceruloplasmin (ferroxidase)	46.487	5.539	1.24038e-09	7.7703e-08
ENSG00000125735	O43557	TNFSF14	tumor necrosis factor superfamily member 14	45.013	5.492	0.000149882	0.00224101
ENSG00000136244	P05231	IL6	interleukin 6	44.679	5.482	7.85108e-12	7.28959e-10
ENSG00000050730	Q96KP6	TNIP3	TNFAIP3 interacting protein 3	44.248	5.468	0.000134502	0.00203742
ENSG00000090339	P05362	ICAM1	intercellular adhesion molecule 1	40.964	5.356	7.97725e-62	2.37015e-58
ENSG00000125538	P01584	IL1B	interleukin 1 beta	40.449	5.338	1.5497e-77	8.05769e-74
ENSG00000171724	Q9HCJ6	VAT1L	vesicle amine transport 1-like	39.801	5.315	0.000681752	0.00752206
ENSG00000159167	P52823	STC1	stanniocalcin 1	39.185	5.292	9.91413e-06	0.00023619
ENSG00000123610	P98066	TNFAIP6	TNF alpha induced protein 6	35.32	5.142	1.45237e-136	1.51032e-132
ENSG00000145681	P10915	HAPLN1	hyaluronan and proteoglycan link protein 1	35.002	5.129	4.86078e-05	0.000878319
ENSG00000163739	P09341	CXCL1	chemokine (C-X-C motif) ligand 1 (melanoma growth stimulating activity, alpha)	32.353	5.016	5.95994e-05	0.00104328
ENSG00000163435	P78545	ELF3	E74-like factor 3 (ets domain transcription factor, epithelial-specific )	31.82	4.992	8.00178e-16	1.20595e-13
ENSG00000184599	Q7Z5A8	FAM19A3	family with sequence similarity 19 (chemokine (C-C motif)-like), member A3	31.454	4.975	4.64225e-11	3.80116e-09
ENSG00000042980	Q9UKQ2	ADAM28	ADAM metallopeptidase domain 28	30.934	4.951	0.000896166	0.00941812
ENSG00000124107	P03973	SLPI	secretory leukocyte peptidase inhibitor	27.341	4.773	1.17699e-53	2.44791e-50
ENSG00000123838	P04003	C4BPA	complement component 4 binding protein, alpha	26.611	4.734	1.50952e-09	9.37167e-08
ENSG00000198768	Q8NCL9	APCDD1L	adenomatosis polyposis coli down-regulated 1-like	25.872	4.693	0.000102937	0.00163052
ENSG00000162692	P19320	VCAM1	vascular cell adhesion molecule 1	25.685	4.683	3.89613e-14	5.01989e-12
ENSG00000019582	P04233	CD74	CD74 molecule, major histocompatibility complex, class II invariant chain	25.498	4.672	1.78525e-11	1.56665e-09
ENSG00000122862	P10124	SRGN	serglycin	25.014	4.645	5.34692e-145	1.11205e-140
ENSG00000225691	P04222	HLA-C	major histocompatibility complex, class I, C	24.894	4.638	8.0154e-06	0.000196123
ENSG00000166347	P00167	CYB5A	cytochrome b5 type A (microsomal)	24.606	4.621	2.61465e-06	7.44925e-05
ENSG00000168269	Q12951	FOXI1	forkhead box I1	24.27	4.601	5.73311e-10	3.82171e-08
ENSG00000127954	Q687X5	STEAP4	STEAP4 metalloreductase	23.968	4.583	1.74368e-46	2.78962e-43
ENSG00000182931	Q8IUB3	WFDC10B	WAP four-disulfide core domain 10B	23.522	4.556	0.000501767	0.00591743
ENSG00000237022	Q29960	HLA-C	major histocompatibility complex, class I, C	23.256	4.54	1.28256e-06	3.9932e-05
ENSG00000121858	P50591	TNFSF10	tumor necrosis factor superfamily member 10	22.343	4.482	8.04411e-12	7.40271e-10
ENSG00000187416	Q86UP9	LHFPL3	lipoma HMGIC fusion partner-like 3	22.273	4.477	7.25915e-05	0.00121559
ENSG00000163347	O95832	CLDN1	claudin 1	22.182	4.471	9.17856e-13	9.89097e-11
ENSG00000108932	O15403	SLC16A6	solute carrier family 16 member 6	21.993	4.459	1.24198e-05	0.000286371
ENSG00000108700	P80075	CCL8	chemokine (C-C motif) ligand 8	21.901	4.453	5.9643e-05	0.00104328
ENSG00000169248	O14625	CXCL11	chemokine (C-X-C motif) ligand 11	21.319	4.414	4.80984e-08	2.15129e-06
ENSG00000232126	P30490	HLA-B	major histocompatibility complex, class I, B	20.827	4.38	6.15958e-07	2.08984e-05
ENSG00000125965	P43026	GDF5	growth differentiation factor 5	20.68	4.37	2.67542e-12	2.64969e-10
ENSG00000115919	Q16719	KYNU	kynureninase	20.604	4.365	1.51475e-08	7.68596e-07
ENSG00000154451	Q96PP8	GBP5	guanylate binding protein 5	20.136	4.332	3.47777e-58	8.03675e-55
ENSG00000170075	O60883	GPR37L1	G protein-coupled receptor 37 like 1	19.912	4.316	2.36043e-05	0.000486544
ENSG00000103888	Q8WUJ3	CEMIP	cell migration inducing protein, hyaluronan binding	19.784	4.306	6.97381e-27	3.15307e-24
ENSG00000004468	P28907	CD38	CD38 molecule	18.88	4.239	2.02726e-06	5.93844e-05
ENSG00000227993	P01903	HLA-DRA	major histocompatibility complex, class II, DR alpha	17.523	4.131	2.75769e-11	2.37002e-09
ENSG00000214510	Q1W4C9	SPINK13	serine peptidase inhibitor, Kazal type 13 (putative)	17.075	4.094	2.52226e-05	0.000509301
ENSG00000140057	Q96M32	AK7	adenylate kinase 7	17.042	4.091	4.62367e-06	0.000122296
ENSG00000121895	Q8N614	TMEM156	transmembrane protein 156	16.925	4.081	8.25881e-18	1.59043e-15
ENSG00000008517	P24001	IL32	interleukin 32	16.832	4.073	4.08937e-42	5.00298e-39
ENSG00000176907	Q9NR00	C8orf4	chromosome 8 open reading frame 4	16.119	4.011	4.4432e-06	0.000118322
ENSG00000163735	P42830	CXCL5	chemokine (C-X-C motif) ligand 5	16.01	4.001	9.1375e-20	2.06567e-17
ENSG00000104368	P00750	PLAT	plasminogen activator, tissue	15.7	3.973	4.603e-73	1.91466e-69
ENSG00000074410	O43570	CA12	carbonic anhydrase XII	15.668	3.97	9.46777e-38	8.56133e-35
ENSG00000108691	P13500	CCL2	chemokine (C-C motif) ligand 2	15.548	3.959	1.41005e-50	2.44386e-47
ENSG00000157890	A6BM72	MEGF11	multiple EGF-like-domains 11	15.303	3.936	1.43426e-13	1.73429e-11
ENSG00000179869	Q86UQ4	ABCA13	ATP binding cassette subfamily A member 13	15.031	3.91	1.07578e-09	6.88431e-08
ENSG00000272196	Q6FI13	HIST2H2AA4	histone cluster 2, H2aa4	14.97	3.904	9.05726e-05	0.00146025
ENSG00000244694	Q6ZW05	PTCHD4	patched domain containing 4	14.945	3.902	5.68785e-05	0.000999965
ENSG00000116833	O00482	NR5A2	nuclear receptor subfamily 5 group A member 2	14.801	3.888	0.000743716	0.00806035
ENSG00000131979	P30793	GCH1	GTP cyclohydrolase 1	14.748	3.882	7.89738e-26	3.15865e-23
ENSG00000115008	P01583	IL1A	interleukin 1 alpha	14.745	3.882	4.75858e-15	6.42656e-13
ENSG00000124882	O14944	EREG	epiregulin	14.624	3.87	1.23302e-06	3.85937e-05
ENSG00000181374	Q99616	CCL13	chemokine (C-C motif) ligand 13	14.615	3.869	1.5965e-06	4.82573e-05
ENSG00000137462	O60603	TLR2	toll-like receptor 2	14.525	3.86	2.43929e-28	1.12739e-25
ENSG00000112096	P04179	SOD2	superoxide dismutase 2, mitochondrial	14.238	3.832	8.07298e-26	3.16796e-23
ENSG00000136842	P28289	TMOD1	tropomodulin 1	14.192	3.827	8.07081e-18	1.56875e-15
ENSG00000105246	Q14213	EBI3	Epstein-Barr virus induced 3	13.946	3.802	6.92517e-07	2.31187e-05
ENSG00000081041	P19875	CXCL2	chemokine (C-X-C motif) ligand 2	13.711	3.777	1.15573e-22	3.5876e-20
ENSG00000188282	Q6ZNE9	RUFY4	RUN and FYVE domain containing 4	13.634	3.769	8.57252e-05	0.00139493
ENSG00000170373	P01037	CST1	cystatin SN	13.555	3.761	2.58223e-05	0.000518891
ENSG00000026751	Q9NQ25	SLAMF7	SLAM family member 7	13.561	3.761	6.88105e-05	0.00116764
ENSG00000160013	P43119	PTGIR	prostaglandin I2 (prostacyclin) receptor (IP)	13.458	3.75	1.13514e-12	1.19841e-10
ENSG00000182782	Q8TDS4	HCAR2	hydroxycarboxylic acid receptor 2	13.216	3.724	9.98119e-09	5.33647e-07
ENSG00000042062	Q96MK2	FAM65C	family with sequence similarity 65 member C	13.088	3.71	3.39484e-20	8.0234e-18
ENSG00000146674	P17936	IGFBP3	insulin like growth factor binding protein 3	12.974	3.698	1.29427e-35	9.28214e-33
ENSG00000133048	P36222	CHI3L1	chitinase 3 like 1	12.746	3.672	0.00125398	0.0122616
ENSG00000163121	Q96EH8	NEURL3	neuralized E3 ubiquitin protein ligase 3	12.743	3.672	1.58735e-26	6.87783e-24
ENSG00000184374	Q9Y6Z7	COLEC10	collectin subfamily member 10	12.694	3.666	2.17407e-07	8.26625e-06
ENSG00000104951	Q96RQ9	IL4I1	interleukin 4 induced 1	12.601	3.655	5.67259e-35	3.80576e-32
ENSG00000138821	Q9C0K1	SLC39A8	solute carrier family 39 (zinc transporter), member 8	12.424	3.635	1.40378e-79	9.73191e-76
ENSG00000163734	P19876	CXCL3	chemokine (C-X-C motif) ligand 3	12.366	3.628	4.38472e-08	1.97816e-06
ENSG00000204359		CFB	complement factor B	12.343	3.626	0.000212542	0.00296874
ENSG00000005102	P50221	MEOX1	mesenchyme homeobox 1	12.344	3.626	0.000627971	0.00705975
ENSG00000109272	P10720	PF4V1	platelet factor 4 variant 1	12.282	3.618	2.51744e-05	0.000508822
ENSG00000112299	O95497	VNN1	vanin 1	12.243	3.614	7.3763e-39	6.97329e-36
ENSG00000197520	A6PVY3	FAM177B	family with sequence similarity 177 member B	12.186	3.607	6.99769e-16	1.06232e-13
ENSG00000057657	O75626	PRDM1	PR domain containing 1, with ZNF domain	11.489	3.522	6.69376e-10	4.3917e-08
ENSG00000043462	Q13094	LCP2	lymphocyte cytosolic protein 2	11.481	3.521	6.30973e-05	0.00109176
ENSG00000125144	P13640	MT1G	metallothionein 1G	11.32	3.501	0.00309229	0.0245293
ENSG00000131203	P14902	IDO1	indoleamine 2,3-dioxygenase 1	11.208	3.486	0.0025042	0.020858
ENSG00000104321	O75762	TRPA1	transient receptor potential cation channel, subfamily A, member 1	11.198	3.485	1.14091e-08	6.03782e-07
ENSG00000149948	P52926	HMGA2	high mobility group AT-hook 2	11.097	3.472	0.00104936	0.0106722
ENSG00000167476	Q96MG2	JSRP1	junctional sarcoplasmic reticulum protein 1	11.071	3.469	0.000644327	0.00721
ENSG00000170458	P08571	CD14	CD14 molecule	10.986	3.458	3.81388e-40	3.7772e-37
ENSG00000162892	Q13007	IL24	interleukin 24	10.628	3.41	0.00373619	0.028308
ENSG00000227471	C9JRZ8	AKR1B15	aldo-keto reductase family 1, member B15	10.514	3.394	0.00123791	0.0121491
ENSG00000169862	Q9UQB3	CTNND2	catenin delta 2	10.502	3.393	0.000356416	0.00450458
ENSG00000145423	Q96HF1	SFRP2	secreted frizzled-related protein 2	10.471	3.388	2.86172e-05	0.000568464
ENSG00000203812	Q6FI13	HIST2H2AA3	histone cluster 2, H2aa3	10.156	3.344	0.00805689	0.0499306
ENSG00000163568	O14862	AIM2	absent in melanoma 2	10.126	3.34	1.99291e-09	1.21908e-07
ENSG00000064270	O75185	ATP2C2	ATPase, Ca++ transporting, type 2C, member 2	10.055	3.33	4.87725e-05	0.000879767
ENSG00000129467	Q8NFM4	ADCY4	adenylate cyclase 4	9.989	3.32	3.32663e-07	1.21669e-05
ENSG00000120875	Q13115	DUSP4	dual specificity phosphatase 4	9.95	3.315	2.27177e-16	3.60675e-14
ENSG00000181634	O95150	TNFSF15	tumor necrosis factor superfamily member 15	9.842	3.299	1.26302e-22	3.86298e-20
ENSG00000123689	P27469	G0S2	G0/G1 switch 2	9.415	3.235	1.58046e-06	4.79161e-05
ENSG00000151834	P47869	GABRA2	gamma-aminobutyric acid (GABA) A receptor, alpha 2	9.198	3.201	6.82676e-13	7.47279e-11
ENSG00000129596	Q16878	CDO1	cysteine dioxygenase type 1	9.144	3.193	0.000367415	0.00461443
ENSG00000133574	Q9NUV9	GIMAP4	GTPase, IMAP family member 4	9.081	3.183	5.27947e-19	1.11894e-16
ENSG00000147697	Q9BYG8	GSDMC	gasdermin C	9.059	3.179	5.09867e-05	0.000911015
ENSG00000158473	P15813	CD1D	CD1d molecule	8.894	3.153	4.79674e-05	0.000869012
ENSG00000213512	Q8N8V2	GBP7	guanylate binding protein 7	8.86	3.147	0.00481434	0.0342555
ENSG00000131386	Q8N3T1	GALNT15	polypeptide N-acetylgalactosaminyltransferase 15	8.85	3.146	2.8573e-06	8.01971e-05
ENSG00000187479	Q7Z7L8	C11orf96	chromosome 11 open reading frame 96	8.75	3.129	1.12222e-17	2.14128e-15
ENSG00000137393	Q7Z419	RNF144B	ring finger protein 144B	8.736	3.127	7.75707e-51	1.46665e-47
ENSG00000163131	P25774	CTSS	cathepsin S	8.709	3.122	3.22837e-37	2.68574e-34
ENSG00000166111	Q8N4V2	SVOP	SV2 related protein	8.638	3.111	0.000139168	0.00210045
ENSG00000091129	Q92823	NRCAM	neuronal cell adhesion molecule	8.432	3.076	9.65453e-22	2.57429e-19
ENSG00000158125	P47989	XDH	xanthine dehydrogenase	8.402	3.071	2.2731e-15	3.21605e-13
ENSG00000153976	Q9Y663	HS3ST3A1	heparan sulfate-glucosamine 3-sulfotransferase 3A1	8.239	3.043	0.000274601	0.00366291
ENSG00000167080	Q8NHY0	B4GALNT2	beta-1,4-N-acetyl-galactosaminyl transferase 2	8.234	3.042	7.88258e-06	0.000193556
ENSG00000169903	P48230	TM4SF4	transmembrane 4 L six family member 4	8.181	3.032	1.09367e-10	8.48738e-09
ENSG00000161249	Q6E0U4	DMKN	dermokine	8.105	3.019	3.36626e-05	0.000649038
ENSG00000079385	P13688	CEACAM1	carcinoembryonic antigen-related cell adhesion molecule 1 (biliary glycoprotein)	8.073	3.013	8.66183e-09	4.70362e-07
ENSG00000189001	Q6UWP8	SBSN	suprabasin	8.06	3.011	0.000835735	0.00888631
ENSG00000134198	O60636	TSPAN2	tetraspanin 2	8.004	3.001	7.56975e-22	2.07152e-19
ENSG00000023445	Q13489	BIRC3	baculoviral IAP repeat containing 3	7.959	2.993	2.4701e-32	1.4678e-29
ENSG00000164181	A1L3X0	ELOVL7	ELOVL fatty acid elongase 7	7.698	2.944	3.6641e-08	1.67854e-06
ENSG00000138378	Q14765	STAT4	signal transducer and activator of transcription 4	7.664	2.938	1.57739e-10	1.18435e-08
ENSG00000162894	O60667	FCMR	Fc fragment of IgM receptor	7.549	2.916	1.16056e-09	7.31435e-08
ENSG00000136689	P18510	IL1RN	interleukin 1 receptor antagonist	7.509	2.909	1.34599e-06	4.17196e-05
ENSG00000173530	Q9UBN6	TNFRSF10D	tumor necrosis factor receptor superfamily member 10d	7.424	2.892	0.00547696	0.0378563
ENSG00000136048	Q8N682	DRAM1	DNA damage regulated autophagy modulator 1	7.408	2.889	1.57957e-26	6.87783e-24
ENSG00000071909	Q8WXR4	MYO3B	myosin IIIB	7.408	2.889	7.59559e-05	0.00126076
ENSG00000167207	Q9HC29	NOD2	nucleotide binding oligomerization domain containing 2	7.305	2.869	5.43637e-12	5.18649e-10
ENSG00000168079	Q6ZMJ2	SCARA5	scavenger receptor class A member 5	7.299	2.868	9.14013e-08	3.80955e-06
ENSG00000164270	Q13639	HTR4	5-hydroxytryptamine (serotonin) receptor 4, G protein-coupled	7.265	2.861	0.00197711	0.0174016
ENSG00000050344	Q9Y4A8	NFE2L3	nuclear factor, erythroid 2 like 3	7.158	2.84	7.82859e-24	2.66916e-21
ENSG00000183454	Q12879	GRIN2A	glutamate receptor, ionotropic, N-methyl D-aspartate 2A	7.096	2.827	1.89644e-05	0.000407882
ENSG00000205755	Q9HC73	CRLF2	cytokine receptor-like factor 2	7.025	2.812	1.88602e-13	2.21613e-11
ENSG00000188064	P56706	WNT7B	wingless-type MMTV integration site family member 7B	6.929	2.793	5.12435e-06	0.000133554
ENSG00000180332	Q8WVF5	KCTD4	potassium channel tetramerization domain containing 4	6.913	2.789	4.62871e-09	2.61597e-07
ENSG00000185291	P26951	IL3RA	interleukin 3 receptor subunit alpha	6.904	2.787	5.46504e-30	3.15728e-27
ENSG00000128510	Q9UI42	CPA4	carboxypeptidase A4	6.888	2.784	2.51616e-05	0.000508822
ENSG00000108846	O15438	ABCC3	ATP binding cassette subfamily C member 3	6.869	2.78	0.00170323	0.0154824
ENSG00000069431	O60706	ABCC9	ATP binding cassette subfamily C member 9	6.859	2.778	0.000377408	0.00470302
ENSG00000239754	P00751	CFB	complement factor B	6.848	2.776	9.67419e-07	3.105e-05
ENSG00000136960	Q13822	ENPP2	ectonucleotide pyrophosphatase/phosphodiesterase 2	6.852	2.776	2.43341e-10	1.74517e-08
ENSG00000171631	Q15077	P2RY6	pyrimidinergic receptor P2Y, G-protein coupled, 6	6.71	2.746	2.87481e-19	6.16395e-17
ENSG00000183615	Q9BTA0	FAM167B	family with sequence similarity 167 member B	6.659	2.735	6.90621e-14	8.70517e-12
ENSG00000183347	Q6ZN66	GBP6	guanylate binding protein family member 6	6.611	2.725	6.83676e-05	0.00116264
ENSG00000171989	Q9BYZ2	LDHAL6B	lactate dehydrogenase A-like 6B	6.523	2.706	0.00356585	0.0273536
ENSG00000041353	O00194	RAB27B	RAB27B, member RAS oncogene family	6.49	2.698	3.8985e-33	2.457e-30
ENSG00000183734	Q99929	ASCL2	achaete-scute family bHLH transcription factor 2	6.451	2.69	0.000532642	0.00620262
ENSG00000163823	P32246	CCR1	chemokine (C-C motif) receptor 1	6.421	2.683	9.19824e-05	0.0014784
ENSG00000162645	P32456	GBP2	guanylate binding protein 2, interferon-inducible	6.361	2.669	2.33201e-41	2.55269e-38
ENSG00000141738	Q14451	GRB7	growth factor receptor bound protein 7	6.329	2.662	0.000124847	0.00191264
ENSG00000157368	Q6ZMJ4	IL34	interleukin 34	6.29	2.653	0.000397966	0.00488601
ENSG00000116703	P20941	PDC	phosducin	6.271	2.649	6.79723e-07	2.27647e-05
ENSG00000138135	O95992	CH25H	cholesterol 25-hydroxylase	6.257	2.645	0.000247662	0.00335562
ENSG00000231274	P0C264	SBK3	SH3 domain binding kinase family member 3	6.25	2.644	4.8725e-22	1.3882e-19
ENSG00000146678	P08833	IGFBP1	insulin like growth factor binding protein 1	6.159	2.623	1.84956e-05	0.00039945
ENSG00000153714	Q8IV03	LURAP1L	leucine rich adaptor protein 1-like	6.023	2.591	1.89974e-28	9.18855e-26
ENSG00000178860	O60682	MSC	musculin	5.982	2.581	1.17205e-17	2.21603e-15
ENSG00000155849	Q92556	ELMO1	engulfment and cell motility 1	5.956	2.574	4.07819e-07	1.45237e-05
ENSG00000154553	Q53GG5	PDLIM3	PDZ and LIM domain 3	5.926	2.567	4.61431e-10	3.14651e-08
ENSG00000102468	P28223	HTR2A	5-hydroxytryptamine (serotonin) receptor 2A, G protein-coupled	5.883	2.557	0.000346524	0.00441606
ENSG00000165507	Q9NTK1	C10orf10	chromosome 10 open reading frame 10	5.877	2.555	0.0028672	0.0232212
ENSG00000166741	P40261	NNMT	nicotinamide N-methyltransferase	5.859	2.551	1.49502e-19	3.3078e-17
ENSG00000140297	O95395	GCNT3	glucosaminyl (N-acetyl) transferase 3, mucin type	5.822	2.542	4.77558e-10	3.22832e-08
ENSG00000271503	P13501	CCL5	chemokine (C-C motif) ligand 5	5.712	2.514	0.00041305	0.00502862
ENSG00000139182	Q9BQT9	CLSTN3	calsyntenin 3	5.607	2.487	4.28583e-05	0.000789519
ENSG00000108551	Q9Y272	RASD1	RAS, dexamethasone-induced 1	5.558	2.474	1.64481e-06	4.93632e-05
ENSG00000100739	P46663	BDKRB1	bradykinin receptor B1	5.55	2.472	2.50613e-18	5.06043e-16
ENSG00000173221	P35754	GLRX	glutaredoxin	5.539	2.47	4.9246e-43	6.82812e-40
ENSG00000163661	P26022	PTX3	pentraxin 3	5.521	2.465	1.70422e-12	1.73747e-10
ENSG00000105835	P43490	NAMPT	nicotinamide phosphoribosyltransferase	5.507	2.461	2.68806e-59	6.98829e-56
ENSG00000189334	Q9HCY8	S100A14	S100 calcium binding protein A14	5.507	2.461	0.00185574	0.0165686
ENSG00000183018	Q8IVW8	SPNS2	spinster homolog 2 (Drosophila)	5.472	2.452	1.47145e-08	7.50077e-07
ENSG00000118503	P21580	TNFAIP3	TNF alpha induced protein 3	5.467	2.451	1.26311e-17	2.36668e-15
ENSG00000116132	P54821	PRRX1	paired related homeobox 1	5.449	2.446	0.00213044	0.0183854
ENSG00000154655	Q8NA19	L3MBTL4	l(3)mbt-like 4 (Drosophila)	5.432	2.442	5.55046e-07	1.91758e-05
ENSG00000164176	O43854	EDIL3	EGF-like repeats and discoidin I-like domains 3	5.42	2.438	0.00177566	0.0160148
ENSG00000152229	Q9H939	PSTPIP2	proline-serine-threonine phosphatase interacting protein 2	5.414	2.437	3.56454e-23	1.15836e-20
ENSG00000166863	Q9UHF0	TAC3	tachykinin 3	5.396	2.432	1.92124e-16	3.12172e-14
ENSG00000154217	Q9UKF7	PITPNC1	phosphatidylinositol transfer protein, cytoplasmic 1	5.343	2.418	2.28404e-17	4.16697e-15
ENSG00000164122	Q8WWX0	ASB5	ankyrin repeat and SOCS box containing 5	5.326	2.413	0.00152279	0.0141786
ENSG00000169116	Q6UWI2	PARM1	prostate androgen-regulated mucin-like protein 1	5.323	2.412	0.0018305	0.0163675
ENSG00000111912	Q8NI08	NCOA7	nuclear receptor coactivator 7	5.318	2.411	7.36081e-36	5.67001e-33
ENSG00000109101	O15353	FOXN1	forkhead box N1	5.261	2.395	0.00105401	0.0106985
ENSG00000142583	P22732	SLC2A5	solute carrier family 2 (facilitated glucose/fructose transporter), member 5	5.203	2.379	1.99139e-22	5.83337e-20
ENSG00000197506	Q9HAS3	SLC28A3	solute carrier family 28 (concentrative nucleoside transporter), member 3	5.194	2.377	0.00043158	0.00521558
ENSG00000198759	Q8IUX8	EGFL6	EGF-like-domain, multiple 6	5.164	2.369	1.3866e-05	0.000314145
ENSG00000133561	Q6P9H5	GIMAP6	GTPase, IMAP family member 6	5.147	2.364	3.30639e-05	0.000642075
ENSG00000163545	Q9H093	NUAK2	NUAK family, SNF1-like kinase, 2	5.147	2.364	3.9101e-14	5.01989e-12
ENSG00000124731	Q9NP99	TREM1	triggering receptor expressed on myeloid cells 1	5.094	2.349	0.00374006	0.0283166
ENSG00000187134	Q04828	AKR1C1	aldo-keto reductase family 1, member C1	5.074	2.343	0.00681077	0.0444603
ENSG00000141431	Q9C0F0	ASXL3	additional sex combs like 3, transcriptional regulator	5.071	2.342	0.0012641	0.0123373
ENSG00000107249	Q8NEA6	GLIS3	GLIS family zinc finger 3	5.054	2.337	2.11899e-12	2.10865e-10
ENSG00000187193	P80297	MT1X	metallothionein 1X	5.022	2.328	7.05342e-22	1.98239e-19
ENSG00000173890	Q9UJ42	GPR160	G protein-coupled receptor 160	4.962	2.311	2.73557e-19	5.92649e-17
ENSG00000145779	O95379	TNFAIP8	TNF alpha induced protein 8	4.952	2.308	4.47889e-21	1.12231e-18
ENSG00000163235	P01135	TGFA	transforming growth factor alpha	4.949	2.307	0.000238531	0.00326071
ENSG00000006118	Q24JP5	TMEM132A	transmembrane protein 132A	4.947	2.307	2.49442e-05	0.000505642
ENSG00000118473	Q9BQI5	SGIP1	SH3-domain GRB2-like (endophilin) interacting protein 1	4.947	2.306	0.00225863	0.0192441
ENSG00000104369	Q9HDC5	JPH1	junctophilin 1	4.94	2.304	1.50784e-05	0.000338012
ENSG00000167779	P24592	IGFBP6	insulin like growth factor binding protein 6	4.882	2.288	3.75756e-18	7.5144e-16
ENSG00000145428	Q8N4F7	RNF175	ring finger protein 175	4.824	2.27	5.78529e-07	1.98225e-05
ENSG00000239713	Q9HC16	APOBEC3G	apolipoprotein B mRNA editing enzyme, catalytic polypeptide-like 3G	4.812	2.267	5.44224e-07	1.88646e-05
ENSG00000115896	Q15111	PLCL1	phospholipase C like 1	4.815	2.267	3.87554e-07	1.38494e-05
ENSG00000062582	Q96EL2	MRPS24	mitochondrial ribosomal protein S24	4.806	2.265	1.75559e-12	1.78111e-10
ENSG00000230708		HLA-DPB1	major histocompatibility complex, class II, DP beta 1	4.797	2.262	5.74764e-11	4.65134e-09
ENSG00000132465	P01591	JCHAIN	joining chain of multimeric IgA and IgM	4.789	2.26	0.00221627	0.0189687
ENSG00000255346	Q96PH1	NOX5	NADPH oxidase, EF-hand calcium binding domain 5	4.781	2.257	0.00234973	0.0198496
ENSG00000196866	P20671	HIST1H2AD	histone cluster 1, H2ad	4.767	2.253	1.18579e-07	4.81681e-06
ENSG00000163874	Q5D1E8	ZC3H12A	zinc finger CCCH-type containing 12A	4.738	2.244	1.25753e-13	1.52948e-11
ENSG00000164283	Q9NQ30	ESM1	endothelial cell-specific molecule 1	4.729	2.242	8.47982e-08	3.59925e-06
ENSG00000163694	A0AV96	RBM47	RNA binding motif protein 47	4.731	2.242	8.09572e-08	3.4503e-06
ENSG00000006606	Q9Y258	CCL26	chemokine (C-C motif) ligand 26	4.714	2.237	1.14032e-09	7.2527e-08
ENSG00000134107	O14503	BHLHE40	basic helix-loop-helix family member e40	4.632	2.212	4.92151e-13	5.5031e-11
ENSG00000154162	P55289	CDH12	cadherin 12, type 2 (N-cadherin 2)	4.634	2.212	4.53905e-07	1.60005e-05
ENSG00000135919	P07093	SERPINE2	serpin peptidase inhibitor, clade E (nexin, plasminogen activator inhibitor type 1), member 2	4.629	2.211	3.33802e-12	3.27472e-10
ENSG00000160951	P34995	PTGER1	prostaglandin E receptor 1	4.626	2.21	0.00332589	0.025878
ENSG00000058335	Q13972	RASGRF1	Ras protein specific guanine nucleotide releasing factor 1	4.623	2.209	0.000549828	0.00634239
ENSG00000104043	Q8TF62	ATP8B4	ATPase, class I, type 8B, member 4	4.602	2.202	4.04277e-18	8.00776e-16
ENSG00000182508	Q86WI0	LHFPL1	lipoma HMGIC fusion partner-like 1	4.596	2.2	0.00379235	0.0286292
ENSG00000249992	Q8WZ71	TMEM158	transmembrane protein 158 (gene/pseudogene)	4.58	2.195	0.000985148	0.0101431
ENSG00000102524	Q9Y275	TNFSF13B	tumor necrosis factor superfamily member 13b	4.58	2.195	5.27565e-26	2.23924e-23
ENSG00000072041	Q9H2J7	SLC6A15	solute carrier family 6 (neutral amino acid transporter), member 15	4.556	2.188	4.57678e-11	3.76236e-09
ENSG00000039139	Q8TE73	DNAH5	dynein, axonemal, heavy chain 5	4.536	2.181	2.53316e-15	3.53588e-13
ENSG00000125657	P41273	TNFSF9	tumor necrosis factor superfamily member 9	4.532	2.18	1.12329e-35	8.34367e-33
ENSG00000218336	Q9P273	TENM3	teneurin transmembrane protein 3	4.483	2.164	3.94355e-06	0.000106655
ENSG00000172183	Q96AZ6	ISG20	interferon stimulated exonuclease gene 20kDa	4.465	2.159	2.1436e-14	2.80393e-12
ENSG00000147872	Q99541	PLIN2	perilipin 2	4.461	2.157	5.80894e-26	2.41629e-23
ENSG00000115963	P61587	RND3	Rho family GTPase 3	4.458	2.156	2.3988e-20	5.80118e-18
ENSG00000118515	O00141	SGK1	serum/glucocorticoid regulated kinase 1	4.45	2.154	5.44907e-29	2.76414e-26
ENSG00000172738	Q8N7C4	TMEM217	transmembrane protein 217	4.415	2.143	6.92993e-11	5.54341e-09
ENSG00000221869	P49716	CEBPD	CCAAT/enhancer binding protein (C/EBP), delta	4.395	2.136	6.99013e-12	6.54868e-10
ENSG00000047617	Q9NQ90	ANO2	anoctamin 2, calcium activated chloride channel	4.383	2.132	8.56686e-07	2.79707e-05
ENSG00000165434	Q6PCE3	PGM2L1	phosphoglucomutase 2-like 1	4.374	2.129	3.76404e-21	9.5469e-19
ENSG00000114315	Q14469	HES1	hes family bHLH transcription factor 1	4.325	2.113	1.62322e-17	3.01426e-15
ENSG00000126803	P54652	HSPA2	heat shock protein family A (Hsp70) member 2	4.278	2.097	0.000306238	0.00399068
ENSG00000109072	P04004	VTN	vitronectin	4.276	2.096	0.000932194	0.00970358
ENSG00000134716	P51589	CYP2J2	cytochrome P450 family 2 subfamily J member 2	4.27	2.094	0.00270396	0.0221777
ENSG00000105855	P26012	ITGB8	integrin subunit beta 8	4.253	2.089	4.83094e-10	3.25158e-08
ENSG00000167996	P02794	FTH1	ferritin, heavy polypeptide 1	4.244	2.085	1.88648e-19	4.12999e-17
ENSG00000133063	Q13231	CHIT1	chitinase 1	4.241	2.084	5.28244e-05	0.000939814
ENSG00000186197	Q8WWZ3	EDARADD	EDAR-associated death domain	4.232	2.081	0.00135523	0.013037
ENSG00000188730	Q2TAL6	VWC2	von Willebrand factor C domain containing 2	4.212	2.074	0.00139198	0.0133167
ENSG00000156463	Q8TEC5	SH3RF2	SH3 domain containing ring finger 2	4.205	2.072	6.07205e-05	0.00105615
ENSG00000119686	Q9UPI3	FLVCR2	feline leukemia virus subgroup C cellular receptor family member 2	4.185	2.065	7.17278e-07	2.38687e-05
ENSG00000134070	O43187	IRAK2	interleukin 1 receptor associated kinase 2	4.164	2.058	9.57354e-17	1.65925e-14
ENSG00000164761	O00300	TNFRSF11B	tumor necrosis factor receptor superfamily member 11b	4.157	2.055	0.00142604	0.0135305
ENSG00000189410	Q6ZV89	SH2D5	SH2 domain containing 5	4.142	2.05	0.000368962	0.00462827
ENSG00000144802	Q9BYH8	NFKBIZ	nuclear factor of kappa light polypeptide gene enhancer in B-cells inhibitor, zeta	4.102	2.036	6.29789e-21	1.55933e-18
ENSG00000179583	P33076	CIITA	class II, major histocompatibility complex, transactivator	4.076	2.027	6.01982e-07	2.05246e-05
ENSG00000196639	P35367	HRH1	histamine receptor H1	4.047	2.017	2.28876e-28	1.08186e-25
ENSG00000162654	Q96PP9	GBP4	guanylate binding protein 4	4.026	2.009	1.47124e-11	1.30208e-09
ENSG00000175471	Q6DN14	MCTP1	multiple C2 domains, transmembrane 1	4.016	2.006	1.7902e-10	1.32974e-08
ENSG00000163453	Q16270	IGFBP7	insulin like growth factor binding protein 7	4.009	2.003	2.94937e-09	1.75762e-07
ENSG00000137090	Q9Y5R6	DMRT1	doublesex and mab-3 related transcription factor 1	3.995	1.998	0.00493928	0.0349888
ENSG00000120129	P28562	DUSP1	dual specificity phosphatase 1	3.982	1.994	1.52895e-09	9.46401e-08
ENSG00000165935	A6NFE2	SMCO2	single-pass membrane protein with coiled-coil domains 2	3.983	1.994	6.77293e-07	2.27374e-05
ENSG00000198797	Q9C0B6	BRINP2	bone morphogenetic protein/retinoic acid inducible neural-specific 2	3.975	1.991	0.00105306	0.010696
ENSG00000181541	Q9Y586	MAB21L2	mab-21-like 2 (C. elegans)	3.959	1.985	1.05712e-06	3.36326e-05
ENSG00000125726	P32970	CD70	CD70 molecule	3.951	1.982	1.569e-18	3.23089e-16
ENSG00000129521	Q9H6Z9	EGLN3	egl-9 family hypoxia-inducible factor 3	3.949	1.981	1.86926e-12	1.87811e-10
ENSG00000085514	Q9UKJ1	PILRA	paired immunoglobin-like type 2 receptor alpha	3.934	1.976	0.00627924	0.0417505
ENSG00000181652	Q674R7	ATG9B	autophagy related 9B	3.907	1.966	0.000375929	0.00469584
ENSG00000166592	P55042	RRAD	Ras-related associated with diabetes	3.883	1.957	2.08536e-11	1.8147e-09
ENSG00000123405	Q16621	NFE2	nuclear factor, erythroid 2	3.873	1.953	0.00283752	0.0230346
ENSG00000115339	Q14435	GALNT3	polypeptide N-acetylgalactosaminyltransferase 3	3.835	1.939	4.92842e-05	0.000886689
ENSG00000138207	P02753	RBP4	retinol binding protein 4	3.831	1.938	4.40199e-15	5.98382e-13
ENSG00000123685	Q9NR55	BATF3	basic leucine zipper transcription factor, ATF-like 3	3.818	1.933	6.15308e-09	3.40351e-07
ENSG00000169031	Q01955	COL4A3	collagen, type IV, alpha 3 (Goodpasture antigen)	3.786	1.921	2.84095e-09	1.70277e-07
ENSG00000104312	O43353	RIPK2	receptor interacting serine/threonine kinase 2	3.782	1.919	1.52944e-24	5.58056e-22
ENSG00000197409	P68431	HIST1H3D	histone cluster 1, H3d	3.78	1.918	1.13433e-05	0.000265075
ENSG00000263528	Q14164	IKBKE	inhibitor of kappa light polypeptide gene enhancer in B-cells, kinase epsilon	3.774	1.916	5.61997e-25	2.12517e-22
ENSG00000159871	Q6UWN5	LYPD5	LY6/PLAUR domain containing 5	3.772	1.915	0.000504584	0.00594579
ENSG00000168490	Q92561	PHYHIP	phytanoyl-CoA 2-hydroxylase interacting protein	3.768	1.914	2.22035e-07	8.41146e-06
ENSG00000065809	Q9H098	FAM107B	family with sequence similarity 107 member B	3.756	1.909	2.28219e-34	1.48328e-31
ENSG00000134668	Q6ZMY3	SPOCD1	SPOC domain containing 1	3.727	1.898	1.70287e-07	6.70764e-06
ENSG00000166578	Q96DY2	IQCD	IQ motif containing D	3.721	1.896	1.35737e-08	7.02255e-07
ENSG00000170385	Q9Y6M5	SLC30A1	solute carrier family 30 (zinc transporter), member 1	3.721	1.896	1.50527e-21	3.91332e-19
ENSG00000196549	P08473	MME	membrane metallo-endopeptidase	3.714	1.893	1.27477e-05	0.000291176
ENSG00000003400	Q92851	CASP10	caspase 10	3.709	1.891	3.09611e-36	2.47665e-33
ENSG00000187550	P0C263	SBK2	SH3 domain binding kinase family member 2	3.706	1.89	8.92492e-09	4.82131e-07
ENSG00000135604	O75558	STX11	syntaxin 11	3.705	1.889	4.46559e-11	3.69616e-09
ENSG00000169908	P30408	TM4SF1	transmembrane 4 L six family member 1	3.693	1.885	1.10509e-08	5.86319e-07
ENSG00000076641	Q9NWQ8	PAG1	phosphoprotein membrane anchor with glycosphingolipid microdomains 1	3.69	1.884	1.61134e-08	8.08813e-07
ENSG00000183696	Q16831	UPP1	uridine phosphorylase 1	3.69	1.884	2.84041e-06	7.98309e-05
ENSG00000154188	Q15389	ANGPT1	angiopoietin 1	3.675	1.878	7.58207e-08	3.25138e-06
ENSG00000104856	Q01201	RELB	v-rel avian reticuloendotheliosis viral oncogene homolog B	3.668	1.875	4.00565e-09	2.30137e-07
ENSG00000128965	Q9BUX1	CHAC1	ChaC glutathione-specific gamma-glutamylcyclotransferase 1	3.649	1.868	0.00453239	0.0327763
ENSG00000113578	P05230	FGF1	fibroblast growth factor 1 (acidic)	3.646	1.867	4.07483e-06	0.000109778
ENSG00000165181	Q5VXU9	C9orf84	chromosome 9 open reading frame 84	3.642	1.865	0.00033169	0.00425833
ENSG00000198930	Q6PB30	CSAG1	chondrosarcoma associated gene 1	3.61	1.852	4.64707e-05	0.000844841
ENSG00000198944	Q2M3V2	SOWAHA	sosondowah ankyrin repeat domain family member A	3.605	1.85	0.00458155	0.0330055
ENSG00000107159	Q16790	CA9	carbonic anhydrase IX	3.591	1.844	1.20528e-07	4.88643e-06
ENSG00000132185	Q7L513	FCRLA	Fc receptor-like A	3.585	1.842	1.01967e-06	3.26264e-05
ENSG00000127561	O43761	SYNGR3	synaptogyrin 3	3.581	1.84	2.34119e-10	1.69069e-08
ENSG00000169715	P04732	MT1E	metallothionein 1E	3.577	1.839	2.38335e-15	3.34924e-13
ENSG00000169169	Q8TCG5	CPT1C	carnitine palmitoyltransferase 1C	3.575	1.838	5.86944e-07	2.00777e-05
ENSG00000197977	Q9NXB9	ELOVL2	ELOVL fatty acid elongase 2	3.561	1.832	7.42745e-22	2.05968e-19
ENSG00000197406	P55073	DIO3	deiodinase, iodothyronine, type III	3.533	1.821	0.00273257	0.0223572
ENSG00000140009	Q92731	ESR2	estrogen receptor 2 (ER beta)	3.533	1.821	0.000516394	0.00604728
ENSG00000172548	Q0D2K0	NIPAL4	NIPA-like domain containing 4	3.531	1.82	0.000119778	0.00184803
ENSG00000277224	P62807	HIST1H2BF	histone cluster 1, H2bf	3.525	1.818	0.00504989	0.0355918
ENSG00000170989	P21453	S1PR1	sphingosine-1-phosphate receptor 1	3.523	1.817	0.00162988	0.0149463
ENSG00000184557	O14543	SOCS3	suppressor of cytokine signaling 3	3.511	1.812	1.51245e-12	1.5728e-10
ENSG00000151632	P52895	AKR1C2	aldo-keto reductase family 1, member C2	3.508	1.811	0.00619911	0.0414031
ENSG00000119986	Q5T686	AVPI1	arginine vasopressin induced 1	3.47	1.795	1.39476e-24	5.18005e-22
ENSG00000113083	P28300	LOX	lysyl oxidase	3.466	1.793	2.07155e-18	4.22392e-16
ENSG00000136327	O15522	NKX2-8	NK2 homeobox 8	3.465	1.793	0.00663241	0.0435144
ENSG00000151490	Q16827	PTPRO	protein tyrosine phosphatase, receptor type, O	3.465	1.793	1.78562e-13	2.11007e-11
ENSG00000172216	P17676	CEBPB	CCAAT/enhancer binding protein (C/EBP), beta	3.462	1.792	4.66464e-12	4.51233e-10
ENSG00000169330	Q9UPX6	KIAA1024	KIAA1024	3.46	1.791	4.06244e-10	2.7977e-08
ENSG00000124116	Q8IUB2	WFDC3	WAP four-disulfide core domain 3	3.452	1.787	1.33748e-07	5.37008e-06
ENSG00000143333	O15492	RGS16	regulator of G-protein signaling 16	3.445	1.785	0.000181186	0.00261325
ENSG00000143036	Q8N4M1	SLC44A3	solute carrier family 44 member 3	3.443	1.784	0.000236249	0.00323793
ENSG00000248712	Q494R4	CCDC153	coiled-coil domain containing 153	3.421	1.775	0.00600398	0.0404768
ENSG00000205336	Q9Y653	ADGRG1	adhesion G protein-coupled receptor G1	3.389	1.761	0.000181517	0.00261621
ENSG00000146374	Q9BXY4	RSPO3	R-spondin 3	3.346	1.742	0.000390858	0.00482437
ENSG00000104635	Q15043	SLC39A14	solute carrier family 39 (zinc transporter), member 14	3.344	1.741	5.24172e-33	3.20639e-30
ENSG00000113494	P16471	PRLR	prolactin receptor	3.341	1.74	0.000737135	0.00800153
ENSG00000133328	Q9NWW9	HRASLS2	HRAS-like suppressor 2	3.336	1.738	3.25039e-05	0.000632381
ENSG00000075275	Q9NYQ6	CELSR1	cadherin, EGF LAG seven-pass G-type receptor 1	3.327	1.734	0.000976538	0.0100787
ENSG00000130066	P21673	SAT1	spermidine/spermine N1-acetyltransferase 1	3.319	1.731	6.39108e-12	6.01456e-10
ENSG00000135124	Q99571	P2RX4	purinergic receptor P2X, ligand gated ion channel, 4	3.313	1.728	6.1276e-14	7.77084e-12
ENSG00000183578	Q5GJ75	TNFAIP8L3	TNF alpha induced protein 8 like 3	3.311	1.727	1.43916e-15	2.06425e-13
ENSG00000171855	P01574	IFNB1	interferon, beta 1, fibroblast	3.298	1.722	3.24475e-05	0.000632381
ENSG00000150782	Q14116	IL18	interleukin 18	3.287	1.717	1.06206e-15	1.54467e-13
ENSG00000175946	Q2WGJ6	KLHL38	kelch like family member 38	3.287	1.717	3.84354e-05	0.00071822
ENSG00000110852	Q92478	CLEC2B	C-type lectin domain family 2 member B	3.273	1.711	2.95667e-13	3.39739e-11
ENSG00000172159	A2A2Y4	FRMD3	FERM domain containing 3	3.265	1.707	0.00202823	0.0177165
ENSG00000124171	Q9BYG5	PARD6B	par-6 family cell polarity regulator beta	3.262	1.706	2.95828e-08	1.38573e-06
ENSG00000281571		AC241585.2		3.246	1.699	2.508e-06	7.2046e-05
ENSG00000163554	P02549	SPTA1	spectrin, alpha, erythrocytic 1	3.234	1.693	0.00013189	0.00200661
ENSG00000159374	Q8TC57	M1AP	meiosis 1 associated protein	3.23	1.692	0.000673751	0.00744563
ENSG00000121797	O00421	CCRL2	chemokine (C-C motif) receptor-like 2	3.209	1.682	0.00768242	0.0482672
ENSG00000177453	Q8IY84	NIM1K	NIM1 serine/threonine protein kinase	3.209	1.682	3.24813e-05	0.000632381
ENSG00000049192	Q9UKP5	ADAMTS6	ADAM metallopeptidase with thrombospondin type 1 motif 6	3.204	1.68	0.00707303	0.0456705
ENSG00000119922	P09913	IFIT2	interferon induced protein with tetratricopeptide repeats 2	3.201	1.679	1.48453e-13	1.7847e-11
ENSG00000164867	P29474	NOS3	nitric oxide synthase 3	3.198	1.677	4.88041e-06	0.000127837
ENSG00000166342	Q8TDF5	NETO1	neuropilin and tolloid like 1	3.193	1.675	0.00104818	0.0106706
ENSG00000197646	Q9BQ51	PDCD1LG2	programmed cell death 1 ligand 2	3.191	1.674	1.157e-09	7.31409e-08
ENSG00000106392	Q9NS00	C1GALT1	core 1 synthase, glycoprotein-N-acetylgalactosamine 3-beta-galactosyltransferase 1	3.189	1.673	4.83462e-35	3.35168e-32
ENSG00000120217	Q9NZQ7	CD274	CD274 molecule	3.181	1.67	1.88545e-08	9.20504e-07
ENSG00000163814	Q9H5V8	CDCP1	CUB domain containing protein 1	3.174	1.666	0.0013964	0.0133344
ENSG00000135245	Q9Y5L2	HILPDA	hypoxia inducible lipid droplet-associated	3.159	1.659	3.86803e-15	5.29258e-13
ENSG00000018625	P50993	ATP1A2	ATPase, Na+/K+ transporting, alpha 2 polypeptide	3.155	1.658	0.00591967	0.0400859
ENSG00000185215	Q03169	TNFAIP2	TNF alpha induced protein 2	3.15	1.655	7.57786e-10	4.92513e-08
ENSG00000177426	Q15583	TGIF1	TGFB-induced factor homeobox 1	3.146	1.654	1.06707e-16	1.8191e-14
ENSG00000122641	P08476	INHBA	inhibin beta A	3.119	1.641	2.61759e-08	1.24294e-06
ENSG00000137872	Q8NFY4	SEMA6D	sema domain, transmembrane domain (TM), and cytoplasmic domain, (semaphorin) 6D	3.117	1.64	1.15368e-09	7.31409e-08
ENSG00000198223	P15509	CSF2RA	colony stimulating factor 2 receptor, alpha, low-affinity (granulocyte-macrophage)	3.111	1.637	0.000905753	0.00947967
ENSG00000169271	Q12988	HSPB3	heat shock protein family B (small) member 3	3.105	1.634	4.57185e-05	0.000834083
ENSG00000115828	Q16769	QPCT	glutaminyl-peptide cyclotransferase	3.091	1.628	0.00259527	0.0214789
ENSG00000173334	Q96RU8	TRIB1	tribbles pseudokinase 1	3.087	1.626	1.13791e-05	0.000265614
ENSG00000135047	P07711	CTSL	cathepsin L	3.082	1.624	6.88119e-16	1.06011e-13
ENSG00000176928	Q9P109	GCNT4	glucosaminyl (N-acetyl) transferase 4, core 2	3.082	1.624	0.000205269	0.00289044
ENSG00000166073	Q14439	GPR176	G protein-coupled receptor 176	3.08	1.623	1.97262e-22	5.83337e-20
ENSG00000125845	P12643	BMP2	bone morphogenetic protein 2	3.065	1.616	6.98264e-16	1.06232e-13
ENSG00000181019	P15559	NQO1	NAD(P)H dehydrogenase, quinone 1	3.066	1.616	1.17392e-08	6.19674e-07
ENSG00000166510	Q9H2F9	CCDC68	coiled-coil domain containing 68	3.053	1.61	2.07471e-07	7.94655e-06
ENSG00000216588	A1L1A6	IGSF23	immunoglobulin superfamily member 23	3.041	1.605	0.00191208	0.0169512
ENSG00000173227	Q8IV01	SYT12	synaptotagmin 12	3.043	1.605	0.00348225	0.0268236
ENSG00000124256	Q9H171	ZBP1	Z-DNA binding protein 1	3.04	1.604	0.0027105	0.0222203
ENSG00000184838	Q569H4	PRR16	proline rich 16	3.037	1.603	7.02435e-11	5.59741e-09
ENSG00000109854	Q9BUP3	HTATIP2	HIV-1 Tat interactive protein 2	3.033	1.601	1.07302e-11	9.70293e-10
ENSG00000281741		AC241377.2		3.02	1.594	0.000153574	0.00228635
ENSG00000085563	P08183	ABCB1	ATP binding cassette subfamily B member 1	3.012	1.591	0.0022618	0.0192554
ENSG00000196843	Q03989	ARID5A	AT-rich interaction domain 5A	3.013	1.591	3.22334e-12	3.1772e-10
ENSG00000042832	P01266	TG	thyroglobulin	3.01	1.59	4.87929e-07	1.70554e-05
ENSG00000099998	P36269	GGT5	gamma-glutamyltransferase 5	2.997	1.584	0.0067752	0.0442477
ENSG00000087086	P02792	FTL	ferritin, light polypeptide	2.995	1.582	1.6291e-08	8.11519e-07
ENSG00000182459	Q8NA77	TEX19	testis expressed 19	2.96	1.566	8.92325e-05	0.00144198
ENSG00000013588	Q8NFJ5	GPRC5A	G protein-coupled receptor, class C, group 5, member A	2.956	1.564	1.78867e-05	0.000387911
ENSG00000112297	Q9Y4K1	AIM1	absent in melanoma 1	2.951	1.561	0.000350827	0.00446268
ENSG00000277075	P04908	HIST1H2AE	histone cluster 1, H2ae	2.948	1.56	0.000448995	0.00537605
ENSG00000204397	Q5EG05	CARD16	caspase recruitment domain family member 16	2.925	1.548	0.000290948	0.00382499
ENSG00000181218	Q7L7L0	HIST3H2A	histone cluster 3, H2a	2.917	1.545	2.53608e-09	1.5333e-07
ENSG00000100906	P25963	NFKBIA	nuclear factor of kappa light polypeptide gene enhancer in B-cells inhibitor, alpha	2.918	1.545	1.01624e-15	1.48843e-13
ENSG00000164344	P03952	KLKB1	kallikrein B1	2.909	1.54	0.00589368	0.0399663
ENSG00000183691	Q13253	NOG	noggin	2.908	1.54	1.08184e-05	0.000254814
ENSG00000007038	Q9Y6M0	PRSS21	protease, serine 21	2.903	1.538	2.59338e-06	7.40894e-05
ENSG00000128052	P35968	KDR	kinase insert domain receptor	2.899	1.535	0.00421171	0.0310291
ENSG00000101680	P25391	LAMA1	laminin subunit alpha 1	2.897	1.534	2.42752e-05	0.000495462
ENSG00000148175	P27105	STOM	stomatin	2.895	1.534	1.69324e-08	8.38477e-07
ENSG00000076944	Q15833	STXBP2	syntaxin binding protein 2	2.881	1.527	3.9479e-05	0.000733112
ENSG00000077522	P35609	ACTN2	actinin, alpha 2	2.879	1.525	0.00099528	0.0102167
ENSG00000168491	Q8TBZ0	CCDC110	coiled-coil domain containing 110	2.868	1.52	0.000996366	0.0102167
ENSG00000145147	O94813	SLIT2	slit guidance ligand 2	2.858	1.515	3.79846e-11	3.16002e-09
ENSG00000178222	Q495C1	RNF212	ring finger protein 212	2.848	1.51	0.00312496	0.0246999
ENSG00000114541	Q9Y2L6	FRMD4B	FERM domain containing 4B	2.844	1.508	1.12892e-12	1.19793e-10
ENSG00000148154	Q16739	UGCG	UDP-glucose ceramide glucosyltransferase	2.839	1.506	3.72117e-21	9.5469e-19
ENSG00000173597	O43704	SULT1B1	sulfotransferase family 1B member 1	2.836	1.504	0.000617946	0.00698101
ENSG00000117226	Q9H0R5	GBP3	guanylate binding protein 3	2.834	1.503	5.86793e-10	3.89908e-08
ENSG00000128284	O95236	APOL3	apolipoprotein L3	2.828	1.5	8.95108e-14	1.10812e-11
ENSG00000005249	P31323	PRKAR2B	protein kinase, cAMP-dependent, regulatory subunit type II beta	2.819	1.495	4.81336e-06	0.000126399
ENSG00000139832	Q9NX57	RAB20	RAB20, member RAS oncogene family	2.819	1.495	0.000100796	0.00160149
ENSG00000176720	Q9UMX3	BOK	BCL2-related ovarian killer	2.815	1.493	4.63359e-06	0.000122296
ENSG00000164647	Q9UHE8	STEAP1	six transmembrane epithelial antigen of the prostate 1	2.813	1.492	1.50892e-07	5.999e-06
ENSG00000183508	Q5VWP2	FAM46C	family with sequence similarity 46 member C	2.811	1.491	6.72591e-10	4.39891e-08
ENSG00000178075	Q8IYS0	GRAMD1C	GRAM domain containing 1C	2.81	1.491	9.0895e-08	3.79605e-06
ENSG00000106366	P05121	SERPINE1	serpin peptidase inhibitor, clade E (nexin, plasminogen activator inhibitor type 1), member 1	2.811	1.491	4.4121e-07	1.56059e-05
ENSG00000170873	O43312	MTSS1	metastasis suppressor 1	2.809	1.49	7.01327e-05	0.00118491
ENSG00000155897	P40145	ADCY8	adenylate cyclase 8 (brain)	2.803	1.487	0.000432895	0.0052254
ENSG00000138356	Q06278	AOX1	aldehyde oxidase 1	2.803	1.487	0.00764339	0.0481135
ENSG00000136997	P01106	MYC	v-myc avian myelocytomatosis viral oncogene homolog	2.798	1.485	1.02813e-12	1.09657e-10
ENSG00000073150	Q96RD6	PANX2	pannexin 2	2.799	1.485	5.66507e-06	0.000146363
ENSG00000144655	Q96S65	CSRNP1	cysteine-serine-rich nuclear protein 1	2.78	1.475	1.5885e-13	1.89871e-11
ENSG00000166923	O60565	GREM1	gremlin 1, DAN family BMP antagonist	2.779	1.475	0.0035021	0.0269363
ENSG00000144959	Q6PIU2	NCEH1	neutral cholesterol ester hydrolase 1	2.774	1.472	6.36397e-07	2.15216e-05
ENSG00000179862	Q96RK1	CITED4	Cbp/p300-interacting transactivator, with Glu/Asp rich carboxy-terminal domain, 4	2.763	1.466	3.45983e-12	3.37829e-10
ENSG00000080031	Q9HD43	PTPRH	protein tyrosine phosphatase, receptor type, H	2.76	1.465	3.61328e-11	3.0302e-09
ENSG00000145358	Q96D03	DDIT4L	DNA damage inducible transcript 4 like	2.751	1.46	3.03619e-06	8.4308e-05
ENSG00000135678	P14384	CPM	carboxypeptidase M	2.738	1.453	1.234e-06	3.85937e-05
ENSG00000168878	P07988	SFTPB	surfactant protein B	2.737	1.453	0.00022064	0.00306538
ENSG00000152804	Q03014	HHEX	hematopoietically expressed homeobox	2.734	1.451	9.30148e-11	7.27264e-09
ENSG00000140563	Q6DN12	MCTP2	multiple C2 domains, transmembrane 2	2.728	1.448	6.12131e-15	8.21361e-13
ENSG00000165959	Q96JQ2	CLMN	calmin (calponin-like, transmembrane)	2.727	1.447	9.61958e-06	0.000230228
ENSG00000197971	P02686	MBP	myelin basic protein	2.726	1.447	0.00120089	0.0118483
ENSG00000134259	P01138	NGF	nerve growth factor (beta polypeptide)	2.714	1.441	0.000408311	0.00498653
ENSG00000253276	Q8N9Z2	CCDC71L	coiled-coil domain containing 71-like	2.705	1.436	5.32624e-19	1.11894e-16
ENSG00000132334	P23469	PTPRE	protein tyrosine phosphatase, receptor type, E	2.706	1.436	3.12253e-11	2.66157e-09
ENSG00000171310	Q9NPF2	CHST11	carbohydrate (chondroitin 4) sulfotransferase 11	2.698	1.432	2.02099e-06	5.92844e-05
ENSG00000141458	O15118	NPC1	Niemann-Pick disease, type C1	2.696	1.431	1.03377e-22	3.25762e-20
ENSG00000073849	P15907	ST6GAL1	ST6 beta-galactosamide alpha-2,6-sialyltranferase 1	2.694	1.43	3.85167e-08	1.76059e-06
ENSG00000221968	Q9Y5Q0	FADS3	fatty acid desaturase 3	2.689	1.427	1.77747e-13	2.11007e-11
ENSG00000158089	Q96FL9	GALNT14	polypeptide N-acetylgalactosaminyltransferase 14	2.685	1.425	2.57386e-05	0.000518211
ENSG00000271605	Q7Z6M3	MILR1	mast cell immunoglobulin-like receptor 1	2.676	1.42	1.89923e-12	1.89905e-10
ENSG00000180596	P62807	HIST1H2BC	histone cluster 1, H2bc	2.668	1.416	0.000249063	0.00337241
ENSG00000156804	Q969P5	FBXO32	F-box protein 32	2.654	1.408	2.67962e-10	1.90207e-08
ENSG00000176692	Q99958	FOXC2	forkhead box C2	2.653	1.408	1.06299e-06	3.37528e-05
ENSG00000104953	Q9H808	TLE6	transducin like enhancer of split 6	2.653	1.408	0.000408192	0.00498653
ENSG00000273802	P62807	HIST1H2BG	histone cluster 1, H2bg	2.647	1.404	0.00257425	0.0213389
ENSG00000089041	Q99572	P2RX7	purinergic receptor P2X, ligand gated ion channel, 7	2.646	1.404	6.03402e-11	4.86417e-09
ENSG00000143320	P29373	CRABP2	cellular retinoic acid binding protein 2	2.639	1.4	3.65029e-05	0.00068767
ENSG00000124721	Q96JB1	DNAH8	dynein, axonemal, heavy chain 8	2.636	1.399	0.000558282	0.00642725
ENSG00000137767	Q9Y6N5	SQRDL	sulfide quinone reductase-like (yeast)	2.634	1.397	7.36528e-15	9.75689e-13
ENSG00000172476	Q8WXH6	RAB40A	RAB40A, member RAS oncogene family	2.632	1.396	0.00400736	0.0298835
ENSG00000159110	P48551	IFNAR2	interferon (alpha, beta and omega) receptor 2	2.63	1.395	4.71323e-11	3.84415e-09
ENSG00000171621	Q96BD6	SPSB1	splA/ryanodine receptor domain and SOCS box containing 1	2.629	1.395	2.36903e-10	1.70488e-08
ENSG00000146457	Q15007	WTAP	Wilms tumor 1 associated protein	2.626	1.393	1.26482e-29	6.74506e-27
ENSG00000173110	P17066	HSPA6	heat shock protein family A (Hsp70) member 6	2.622	1.391	0.00312579	0.0246999
ENSG00000011422	Q03405	PLAUR	plasminogen activator, urokinase receptor	2.623	1.391	5.78364e-06	0.000149056
ENSG00000112137	Q9C0D0	PHACTR1	phosphatase and actin regulator 1	2.62	1.39	6.07347e-05	0.00105615
ENSG00000120885	P10909	CLU	clusterin	2.616	1.387	1.50136e-05	0.000337207
ENSG00000014914	A4FU01	MTMR11	myotubularin related protein 11	2.611	1.385	0.00276543	0.0225816
ENSG00000135148	O14545	TRAFD1	TRAF-type zinc finger domain containing 1	2.611	1.384	8.603e-22	2.3237e-19
ENSG00000007264	P42679	MATK	megakaryocyte-associated tyrosine kinase	2.608	1.383	0.00762345	0.0480316
ENSG00000184588	Q07343	PDE4B	phosphodiesterase 4B	2.606	1.382	7.86167e-06	0.000193271
ENSG00000121900	Q969K7	TMEM54	transmembrane protein 54	2.606	1.382	6.1851e-06	0.000158226
ENSG00000173918	Q9BXJ1	C1QTNF1	C1q and tumor necrosis factor related protein 1	2.603	1.38	2.29416e-05	0.000476187
ENSG00000138166	Q16690	DUSP5	dual specificity phosphatase 5	2.601	1.379	6.05751e-20	1.39982e-17
ENSG00000140961	Q9UJX0	OSGIN1	oxidative stress induced growth inhibitor 1	2.599	1.378	1.5222e-06	4.63525e-05
ENSG00000156273	O14867	BACH1	BTB and CNC homology 1, basic leucine zipper transcription factor 1	2.598	1.377	2.49666e-22	7.21187e-20
ENSG00000056972	O43734	TRAF3IP2	TRAF3 interacting protein 2	2.598	1.377	4.70156e-10	3.19552e-08
ENSG00000111913	Q9Y4F9	FAM65B	family with sequence similarity 65 member B	2.595	1.376	3.85492e-15	5.29258e-13
ENSG00000174136	Q6NW40	RGMB	repulsive guidance molecule family member b	2.576	1.365	7.20432e-09	3.95344e-07
ENSG00000170442	O43790	KRT86	keratin 86, type II	2.56	1.356	1.52247e-05	0.000340477
ENSG00000145911	O15049	N4BP3	NEDD4 binding protein 3	2.56	1.356	0.000700129	0.00768405
ENSG00000110203	P41439	FOLR3	folate receptor 3 (gamma)	2.548	1.349	0.00046164	0.00550527
ENSG00000135744	P01019	AGT	angiotensinogen (serpin peptidase inhibitor, clade A, member 8)	2.544	1.347	0.000956708	0.00990424
ENSG00000167772	Q9BY76	ANGPTL4	angiopoietin like 4	2.543	1.347	3.42977e-13	3.89794e-11
ENSG00000154856	Q8J025	APCDD1	adenomatosis polyposis coli down-regulated 1	2.541	1.345	1.28196e-16	2.13297e-14
ENSG00000141448	Q92908	GATA6	GATA binding protein 6	2.535	1.342	0.00118626	0.0117374
ENSG00000119508	Q92570	NR4A3	nuclear receptor subfamily 4 group A member 3	2.534	1.342	0.00022479	0.00311264
ENSG00000107968	P41279	MAP3K8	mitogen-activated protein kinase kinase kinase 8	2.531	1.34	0.000185519	0.0026482
ENSG00000162493	Q86YL7	PDPN	podoplanin	2.532	1.34	2.02936e-09	1.23773e-07
ENSG00000107338	Q15464	SHB	Src homology 2 domain containing adaptor protein B	2.527	1.338	1.23422e-08	6.44957e-07
ENSG00000134532	P35711	SOX5	SRY-box 5	2.528	1.338	5.39025e-05	0.000955725
ENSG00000143355	Q9NQ69	LHX9	LIM homeobox 9	2.525	1.336	0.000271497	0.00363359
ENSG00000145623	Q99650	OSMR	oncostatin M receptor	2.513	1.33	4.93486e-17	8.6979e-15
ENSG00000136810	P10599	TXN	thioredoxin	2.514	1.33	2.468e-07	9.22978e-06
ENSG00000100209	Q8IWL3	HSCB	HscB mitochondrial iron-sulfur cluster co-chaperone	2.511	1.328	3.3273e-10	2.33788e-08
ENSG00000155367	Q5JR12	PPM1J	protein phosphatase, Mg2+/Mn2+ dependent 1J	2.5	1.322	0.00656616	0.0432161
ENSG00000073282	Q9H3D4	TP63	tumor protein p63	2.5	1.322	2.64508e-06	7.51535e-05
ENSG00000122729	P21399	ACO1	aconitase 1	2.494	1.319	8.64112e-13	9.36031e-11
ENSG00000165030	Q16649	NFIL3	nuclear factor, interleukin 3 regulated	2.491	1.317	1.17418e-13	1.4365e-11
ENSG00000146232	O00221	NFKBIE	nuclear factor of kappa light polypeptide gene enhancer in B-cells inhibitor, epsilon	2.491	1.317	4.04947e-20	9.46302e-18
ENSG00000117228	P32455	GBP1	guanylate binding protein 1, interferon-inducible	2.489	1.316	2.26769e-07	8.55962e-06
ENSG00000123240	Q96CV9	OPTN	optineurin	2.489	1.316	1.37963e-08	7.12e-07
ENSG00000140285	P21781	FGF7	fibroblast growth factor 7	2.487	1.314	3.77358e-11	3.15193e-09
ENSG00000179331	Q14964	RAB39A	RAB39A, member RAS oncogene family	2.487	1.314	0.00152503	0.0141786
ENSG00000145365	Q96CG3	TIFA	TRAF-interacting protein with forkhead-associated domain	2.487	1.314	2.39535e-09	1.45243e-07
ENSG00000134470	Q13261	IL15RA	interleukin 15 receptor subunit alpha	2.485	1.313	1.11352e-14	1.46576e-12
ENSG00000213949	P56199	ITGA1	integrin subunit alpha 1	2.482	1.311	3.81446e-09	2.2037e-07
ENSG00000162711	Q96P20	NLRP3	NLR family, pyrin domain containing 3	2.475	1.308	0.000292407	0.00384174
ENSG00000118596	O60669	SLC16A7	solute carrier family 16 (monocarboxylate transporter), member 7	2.475	1.308	1.43736e-19	3.21443e-17
ENSG00000161011	Q13501	SQSTM1	sequestosome 1	2.476	1.308	9.38708e-08	3.90465e-06
ENSG00000185338	O15524	SOCS1	suppressor of cytokine signaling 1	2.473	1.306	8.96575e-09	4.83082e-07
ENSG00000179630	Q8IV20	LACC1	laccase (multicopper oxidoreductase) domain containing 1	2.469	1.304	1.07634e-07	4.42408e-06
ENSG00000161642	Q96PM9	ZNF385A	zinc finger protein 385A	2.47	1.304	0.000507279	0.00597417
ENSG00000187244	P50895	BCAM	basal cell adhesion molecule (Lutheran blood group)	2.452	1.294	0.00138886	0.013299
ENSG00000157214	Q8NFT2	STEAP2	STEAP2 metalloreductase	2.45	1.293	9.5371e-05	0.00152579
ENSG00000104419	Q92597	NDRG1	N-myc downstream regulated 1	2.443	1.289	3.63575e-07	1.31051e-05
ENSG00000189060	P07305	H1F0	H1 histone family member 0	2.439	1.286	2.4931e-10	1.77574e-08
ENSG00000205220	P40306	PSMB10	proteasome subunit beta 10	2.434	1.283	1.631e-08	8.11519e-07
ENSG00000143226	P12318	FCGR2A	Fc fragment of IgG, low affinity IIa, receptor (CD32)	2.432	1.282	2.9583e-07	1.0909e-05
ENSG00000119514	Q8IXK2	GALNT12	polypeptide N-acetylgalactosaminyltransferase 12	2.427	1.279	5.52978e-08	2.4522e-06
ENSG00000130513	Q99988	GDF15	growth differentiation factor 15	2.425	1.278	8.98979e-06	0.000216902
ENSG00000125347	P10914	IRF1	interferon regulatory factor 1	2.426	1.278	5.81723e-08	2.56328e-06
ENSG00000158859	O75173	ADAMTS4	ADAM metallopeptidase with thrombospondin type 1 motif 4	2.418	1.274	1.08543e-05	0.00025537
ENSG00000110328	Q6P9A2	GALNT18	polypeptide N-acetylgalactosaminyltransferase 18	2.416	1.273	1.79767e-08	8.85971e-07
ENSG00000135480	P08729	KRT7	keratin 7, type II	2.411	1.27	2.41059e-06	6.94398e-05
ENSG00000182870	Q9HCQ5	GALNT9	polypeptide N-acetylgalactosaminyltransferase 9	2.411	1.269	0.000899715	0.00943159
ENSG00000180992	Q6P1L8	MRPL14	mitochondrial ribosomal protein L14	2.407	1.268	4.50081e-09	2.55062e-07
ENSG00000108448	Q309B1	TRIM16L	tripartite motif containing 16-like	2.406	1.266	1.17893e-08	6.20745e-07
ENSG00000153993	O95025	SEMA3D	sema domain, immunoglobulin domain (Ig), short basic domain, secreted, (semaphorin) 3D	2.399	1.263	1.19077e-05	0.000276402
ENSG00000106560	Q9UG22	GIMAP2	GTPase, IMAP family member 2	2.397	1.261	1.17374e-16	1.98468e-14
ENSG00000116514	Q6ZMZ0	RNF19B	ring finger protein 19B	2.391	1.257	1.84246e-12	1.86017e-10
ENSG00000111670	Q3T906	GNPTAB	N-acetylglucosamine-1-phosphate transferase, alpha and beta subunits	2.387	1.255	8.59577e-16	1.2688e-13
ENSG00000110002	O00534	VWA5A	von Willebrand factor A domain containing 5A	2.386	1.255	2.55309e-05	0.000514528
ENSG00000023171	Q3KR37	GRAMD1B	GRAM domain containing 1B	2.385	1.254	0.000182926	0.00263105
ENSG00000104415	O95388	WISP1	WNT1 inducible signaling pathway protein 1	2.383	1.253	3.48923e-07	1.26427e-05
ENSG00000159182	Q96KF2	PRAC1	prostate cancer susceptibility candidate 1	2.382	1.252	0.0067362	0.0440588
ENSG00000110492	P21741	MDK	midkine (neurite growth-promoting factor 2)	2.379	1.25	2.32662e-08	1.11764e-06
ENSG00000143479	O43781	DYRK3	dual specificity tyrosine-(Y)-phosphorylation regulated kinase 3	2.367	1.243	4.39969e-13	4.97309e-11
ENSG00000147724	Q49AJ0	FAM135B	family with sequence similarity 135 member B	2.367	1.243	0.0013254	0.0127856
ENSG00000188060	Q8N4Z0	RAB42	RAB42, member RAS oncogene family	2.367	1.243	6.10292e-11	4.90072e-09
ENSG00000159231	O75828	CBR3	carbonyl reductase 3	2.365	1.242	7.60661e-12	7.09427e-10
ENSG00000132821	Q96N03	VSTM2L	V-set and transmembrane domain containing 2 like	2.362	1.24	5.62025e-07	1.93526e-05
ENSG00000133687	Q8IUR5	TMTC1	transmembrane and tetratricopeptide repeat containing 1	2.353	1.234	8.74406e-06	0.00021171
ENSG00000078098	Q12884	FAP	fibroblast activation protein alpha	2.351	1.233	0.000156034	0.00231807
ENSG00000165312	Q5VV17	OTUD1	OTU deubiquitinase 1	2.35	1.233	4.15677e-08	1.89174e-06
ENSG00000141401	O14732	IMPA2	inositol(myo)-1(or 4)-monophosphatase 2	2.35	1.232	7.79645e-17	1.36261e-14
ENSG00000091073	Q86UW9	DTX2	deltex 2, E3 ubiquitin ligase	2.348	1.231	2.18774e-07	8.30303e-06
ENSG00000147592	Q53H82	LACTB2	lactamase beta 2	2.344	1.229	2.95068e-13	3.39739e-11
ENSG00000129595	Q9HCS5	EPB41L4A	erythrocyte membrane protein band 4.1 like 4A	2.339	1.226	1.84602e-06	5.46916e-05
ENSG00000197442	Q99683	MAP3K5	mitogen-activated protein kinase kinase kinase 5	2.339	1.226	5.06811e-10	3.38928e-08
ENSG00000052802	Q15800	MSMO1	methylsterol monooxygenase 1	2.339	1.226	6.36695e-06	0.000162279
ENSG00000138771	Q8TF72	SHROOM3	shroom family member 3	2.339	1.226	2.45517e-07	9.20046e-06
ENSG00000152402	P33402	GUCY1A2	guanylate cyclase 1, soluble, alpha 2	2.337	1.225	4.76647e-09	2.67927e-07
ENSG00000113119	Q96DC7	TMCO6	transmembrane and coiled-coil domains 6	2.334	1.223	1.03169e-11	9.36994e-10
ENSG00000243449	Q5BLP8	C4orf48	chromosome 4 open reading frame 48	2.329	1.219	0.000183177	0.00263284
ENSG00000149633	Q5JYT7	KIAA1755	KIAA1755	2.327	1.219	7.49568e-05	0.00124716
ENSG00000137496	O95998	IL18BP	interleukin 18 binding protein	2.32	1.214	1.81543e-07	7.04426e-06
ENSG00000132141	Q92526	CCT6B	chaperonin containing TCP1, subunit 6B (zeta 2)	2.313	1.21	0.000164283	0.00241808
ENSG00000121690	Q96QD5	DEPDC7	DEP domain containing 7	2.31	1.208	4.68826e-07	1.64152e-05
ENSG00000061656	Q9NPE6	SPAG4	sperm associated antigen 4	2.307	1.206	0.00206842	0.0179996
ENSG00000155011	Q9UBU2	DKK2	dickkopf WNT signaling pathway inhibitor 2	2.303	1.204	0.000106299	0.00167129
ENSG00000169432	Q15858	SCN9A	sodium channel, voltage gated, type IX alpha subunit	2.301	1.202	1.20233e-06	3.77734e-05
ENSG00000070540	Q5MNZ9	WIPI1	WD repeat domain, phosphoinositide interacting 1	2.3	1.202	1.12335e-05	0.000263398
ENSG00000133805	Q01432	AMPD3	adenosine monophosphate deaminase 3	2.299	1.201	5.15985e-09	2.89258e-07
ENSG00000185947	Q14586	ZNF267	zinc finger protein 267	2.296	1.199	5.61002e-07	1.93494e-05
ENSG00000008394	P10620	MGST1	microsomal glutathione S-transferase 1	2.289	1.194	0.000142993	0.00215504
ENSG00000183765	O96017	CHEK2	checkpoint kinase 2	2.287	1.193	3.48862e-07	1.26427e-05
ENSG00000028137	P20333	TNFRSF1B	tumor necrosis factor receptor superfamily member 1B	2.285	1.192	1.00787e-09	6.46966e-08
ENSG00000197142	Q9ULC5	ACSL5	acyl-CoA synthetase long-chain family member 5	2.281	1.19	4.96442e-10	3.33065e-08
ENSG00000104213	Q15198	PDGFRL	platelet-derived growth factor receptor-like	2.278	1.188	3.87403e-08	1.76693e-06
ENSG00000087842	O00625	PIR	pirin	2.277	1.187	4.62793e-05	0.000842096
ENSG00000133105	Q8WXD0	RXFP2	relaxin/insulin-like family peptide receptor 2	2.277	1.187	0.00106135	0.0107531
ENSG00000143878	P62745	RHOB	ras homolog family member B	2.274	1.185	4.43146e-07	1.56478e-05
ENSG00000137819	Q9NXK6	PAQR5	progestin and adipoQ receptor family member V	2.27	1.183	8.81299e-08	3.71038e-06
ENSG00000124216	O95863	SNAI1	snail family zinc finger 1	2.271	1.183	2.78206e-06	7.85091e-05
ENSG00000151773	Q5T0U0	CCDC122	coiled-coil domain containing 122	2.264	1.179	2.89252e-05	0.000572395
ENSG00000067798	Q8IVL0	NAV3	neuron navigator 3	2.265	1.179	0.00350167	0.0269363
ENSG00000100284	O60784	TOM1	target of myb1 membrane trafficking protein	2.265	1.179	2.48218e-06	7.14029e-05
ENSG00000261371		PECAM1	platelet/endothelial cell adhesion molecule 1	2.261	1.177	0.00111616	0.0111947
ENSG00000077150	Q00653	NFKB2	nuclear factor of kappa light polypeptide gene enhancer in B-cells 2 (p49/p100)	2.259	1.176	6.04495e-07	2.05766e-05
ENSG00000135114	Q15646	OASL	2'-5'-oligoadenylate synthetase-like	2.26	1.176	8.85722e-08	3.72146e-06
ENSG00000067715	P21579	SYT1	synaptotagmin 1	2.26	1.176	0.000441388	0.00530022
ENSG00000133321	Q9UL19	RARRES3	retinoic acid receptor responder (tazarotene induced) 3	2.257	1.175	9.53126e-07	3.06859e-05
ENSG00000116260	O00391	QSOX1	quiescin sulfhydryl oxidase 1	2.253	1.172	0.00100772	0.0103142
ENSG00000102804	Q15714	TSC22D1	TSC22 domain family member 1	2.253	1.172	7.74094e-05	0.00127998
ENSG00000196284	O75486	SUPT3H	SPT3 homolog, SAGA and STAGA complex component	2.251	1.171	0.00798882	0.0496419
ENSG00000258947	Q13509	TUBB3	tubulin beta 3 class III	2.251	1.171	3.54552e-06	9.7282e-05
ENSG00000122420	P43088	PTGFR	prostaglandin F receptor (FP)	2.251	1.17	1.89964e-05	0.000408147
ENSG00000100647	Q92537	SUSD6	sushi domain containing 6	2.242	1.165	3.13965e-09	1.84981e-07
ENSG00000160606	Q96CP7	TLCD1	TLC domain containing 1	2.242	1.165	1.93542e-07	7.45423e-06
ENSG00000188372	P21754	ZP3	zona pellucida glycoprotein 3 (sperm receptor)	2.24	1.163	0.00182839	0.0163675
ENSG00000159184	Q92826	HOXB13	homeobox B13	2.237	1.162	1.22216e-16	2.04988e-14
ENSG00000111885	P33908	MAN1A1	mannosidase, alpha, class 1A, member 1	2.237	1.162	3.10655e-06	8.60319e-05
ENSG00000136379	Q6PCB6	ABHD17C	abhydrolase domain containing 17C	2.236	1.161	3.06974e-10	2.17158e-08
ENSG00000137309	P17096	HMGA1	high mobility group AT-hook 1	2.235	1.161	0.000171679	0.00251095
ENSG00000125148	P02795	MT2A	metallothionein 2A	2.236	1.161	1.16765e-12	1.2265e-10
ENSG00000123179	Q9BY08	EBPL	emopamil binding protein-like	2.23	1.157	2.93642e-05	0.000579427
ENSG00000110324	Q13651	IL10RA	interleukin 10 receptor subunit alpha	2.23	1.157	7.30776e-05	0.0012198
ENSG00000158315	Q9NX52	RHBDL2	rhomboid, veinlet-like 2 (Drosophila)	2.228	1.155	9.3099e-06	0.000223847
ENSG00000162551	P05186	ALPL	alkaline phosphatase, liver/bone/kidney	2.223	1.152	0.00070952	0.00775846
ENSG00000124813	Q13950	RUNX2	runt-related transcription factor 2	2.223	1.152	0.00126511	0.0123413
ENSG00000137962	Q52LW3	ARHGAP29	Rho GTPase activating protein 29	2.212	1.145	2.88806e-14	3.75412e-12
ENSG00000139132	Q96M96	FGD4	FYVE, RhoGEF and PH domain containing 4	2.211	1.145	7.38744e-07	2.45343e-05
ENSG00000102265	P01033	TIMP1	TIMP metallopeptidase inhibitor 1	2.211	1.145	7.26165e-08	3.12687e-06
ENSG00000110628	Q96BI1	SLC22A18	solute carrier family 22 member 18	2.204	1.14	0.00456141	0.0329061
ENSG00000140105	P23381	WARS	tryptophanyl-tRNA synthetase	2.203	1.139	1.32289e-15	1.91066e-13
ENSG00000196954	P49662	CASP4	caspase 4	2.202	1.138	3.6165e-17	6.48414e-15
ENSG00000135241	Q9NP80	PNPLA8	patatin like phospholipase domain containing 8	2.201	1.138	8.82964e-14	1.09963e-11
ENSG00000101187	Q96BD0	SLCO4A1	solute carrier organic anion transporter family member 4A1	2.199	1.137	0.00097544	0.0100731
ENSG00000183570	P57721	PCBP3	poly(rC) binding protein 3	2.19	1.131	0.000921966	0.00961745
ENSG00000124762	P38936	CDKN1A	cyclin-dependent kinase inhibitor 1A (p21, Cip1)	2.185	1.128	4.87072e-13	5.47575e-11
ENSG00000162636	Q5T8I3	FAM102B	family with sequence similarity 102 member B	2.179	1.124	2.06284e-10	1.51067e-08
ENSG00000168386	Q4L180	FILIP1L	filamin A interacting protein 1-like	2.177	1.122	0.00021223	0.00296637
ENSG00000273772	Q16637	SMN2	survival of motor neuron 2, centromeric	2.176	1.122	2.36488e-07	8.89417e-06
ENSG00000120910	P48454	PPP3CC	protein phosphatase 3, catalytic subunit, gamma isozyme	2.17	1.118	1.31921e-16	2.17754e-14
ENSG00000152223	Q9HCE0	EPG5	ectopic P-granules autophagy protein 5 homolog (C. elegans)	2.166	1.115	2.92446e-11	2.503e-09
ENSG00000182326	P09871	C1S	complement component 1, s subcomponent	2.165	1.114	0.00367998	0.0279636
ENSG00000026103	P25445	FAS	Fas cell surface death receptor	2.164	1.114	5.7486e-13	6.35954e-11
ENSG00000162777	Q9H6A0	DENND2D	DENN/MADD domain containing 2D	2.161	1.112	0.000253453	0.00341998
ENSG00000181284	Q8N9M5	TMEM102	transmembrane protein 102	2.156	1.108	0.00227382	0.0193182
ENSG00000148841	Q8IWB1	ITPRIP	inositol 1,4,5-trisphosphate receptor interacting protein	2.153	1.107	9.41996e-07	3.03746e-05
ENSG00000155090	Q13118	KLF10	Kruppel-like factor 10	2.153	1.106	2.29783e-06	6.64676e-05
ENSG00000144810	P27658	COL8A1	collagen, type VIII, alpha 1	2.151	1.105	0.000564053	0.00647774
ENSG00000171617	O14682	ENC1	ectodermal-neural cortex 1 (with BTB domain)	2.151	1.105	0.000587758	0.00671659
ENSG00000223532	P30479	HLA-B	major histocompatibility complex, class I, B	2.149	1.104	4.6052e-07	1.61789e-05
ENSG00000182704	Q8WUA8	TSKU	tsukushi, small leucine rich proteoglycan	2.15	1.104	5.02285e-08	2.23216e-06
ENSG00000025708	P19971	TYMP	thymidine phosphorylase	2.148	1.103	7.0189e-13	7.64288e-11
ENSG00000131037	Q8TE68	EPS8L1	EPS8 like 1	2.147	1.102	0.00267437	0.0220022
ENSG00000118407	Q7Z7B0	FILIP1	filamin A interacting protein 1	2.144	1.1	0.000675552	0.00746157
ENSG00000131669	Q92982	NINJ1	ninjurin 1	2.142	1.099	1.61953e-08	8.09689e-07
ENSG00000067167	Q15629	TRAM1	translocation associated membrane protein 1	2.14	1.098	2.08574e-06	6.08404e-05
ENSG00000137403	P30511	HLA-F	major histocompatibility complex, class I, F	2.138	1.096	0.000376259	0.00469714
ENSG00000158769	Q9Y624	F11R	F11 receptor	2.134	1.094	0.00244592	0.0205039
ENSG00000175482	Q9HCU8	POLD4	polymerase (DNA-directed), delta 4, accessory subunit	2.133	1.093	1.95673e-05	0.000417487
ENSG00000161653	Q8N159	NAGS	N-acetylglutamate synthase	2.129	1.09	0.000395764	0.00486472
ENSG00000010030	Q9Y603	ETV7	ets variant 7	2.127	1.089	3.30816e-06	9.11299e-05
ENSG00000177283	Q9H461	FZD8	frizzled class receptor 8	2.125	1.088	8.15885e-05	0.00134034
ENSG00000151702	Q01543	FLI1	Fli-1 proto-oncogene, ETS transcription factor	2.119	1.083	2.04244e-05	0.000431256
ENSG00000137193	P11309	PIM1	Pim-1 proto-oncogene, serine/threonine kinase	2.116	1.081	0.00133237	0.0128469
ENSG00000148834	P78417	GSTO1	glutathione S-transferase omega 1	2.113	1.079	1.66565e-05	0.000367751
ENSG00000147408	Q8TDX6	CSGALNACT1	chondroitin sulfate N-acetylgalactosaminyltransferase 1	2.111	1.078	0.000242453	0.0033009
ENSG00000213626	Q53QV2	LBH	limb bud and heart development	2.11	1.077	2.03679e-05	0.000430715
ENSG00000146143	P49643	PRIM2	primase, DNA, polypeptide 2 (58kDa)	2.11	1.077	6.82137e-08	2.96181e-06
ENSG00000280649		AC245100.1		2.108	1.076	0.00111132	0.0111684
ENSG00000054277	Q9H1Y3	OPN3	opsin 3	2.108	1.076	0.00010552	0.00166258
ENSG00000180817	Q15181	PPA1	pyrophosphatase (inorganic) 1	2.106	1.074	6.88589e-08	2.9836e-06
ENSG00000198814	P32189	GK	glycerol kinase	2.102	1.072	1.83252e-05	0.000396182
ENSG00000135363	P25791	LMO2	LIM domain only 2	2.1	1.07	1.0593e-05	0.000250073
ENSG00000110446	Q8IY34	SLC15A3	solute carrier family 15 (oligopeptide transporter), member 3	2.099	1.069	3.53868e-06	9.72225e-05
ENSG00000167034	Q99801	NKX3-1	NK3 homeobox 1	2.096	1.068	4.48614e-08	2.01954e-06
ENSG00000165996	B0YJ81	HACD1	3-hydroxyacyl-CoA dehydratase 1	2.092	1.065	0.000221382	0.00307363
ENSG00000151468	Q9BQI4	CCDC3	coiled-coil domain containing 3	2.091	1.064	5.98573e-05	0.00104583
ENSG00000197635	P27487	DPP4	dipeptidyl-peptidase 4	2.091	1.064	2.77777e-06	7.84946e-05
ENSG00000141337	Q96EG1	ARSG	arylsulfatase G	2.085	1.06	8.67166e-07	2.82685e-05
ENSG00000198839	Q9NRM2	ZNF277	zinc finger protein 277	2.084	1.06	1.87116e-06	5.53577e-05
ENSG00000174004	Q86YC3	NRROS	negative regulator of reactive oxygen species	2.079	1.056	0.00313912	0.0247582
ENSG00000021355	P30740	SERPINB1	serpin peptidase inhibitor, clade B (ovalbumin), member 1	2.078	1.055	6.90146e-08	2.98413e-06
ENSG00000214212	A8MVS5	C19orf38	chromosome 19 open reading frame 38	2.076	1.054	0.00121204	0.0119376
ENSG00000114480	Q04446	GBE1	glucan (1,4-alpha-), branching enzyme 1	2.075	1.053	5.67496e-05	0.000998543
ENSG00000168546	O00451	GFRA2	GDNF family receptor alpha 2	2.072	1.051	0.000312571	0.00406558
ENSG00000164171	P17301	ITGA2	integrin subunit alpha 2	2.072	1.051	2.77051e-05	0.000552455
ENSG00000176473	Q64LD2	WDR25	WD repeat domain 25	2.072	1.051	2.40824e-08	1.15407e-06
ENSG00000166963	P78559	MAP1A	microtubule associated protein 1A	2.07	1.05	0.00268027	0.022042
ENSG00000103642	P83111	LACTB	lactamase beta	2.066	1.047	2.22665e-13	2.58715e-11
ENSG00000140459	P05108	CYP11A1	cytochrome P450 family 11 subfamily A member 1	2.065	1.046	0.00501108	0.0354009
ENSG00000129682	Q92913	FGF13	fibroblast growth factor 13	2.064	1.046	0.000464273	0.00552716
ENSG00000179542	Q8IW52	SLITRK4	SLIT and NTRK like family member 4	2.065	1.046	8.44024e-05	0.00137877
ENSG00000137216	Q5T3F8	TMEM63B	transmembrane protein 63B	2.065	1.046	3.28238e-08	1.51704e-06
ENSG00000149243	Q6PF15	KLHL35	kelch like family member 35	2.063	1.045	0.00419785	0.0309489
ENSG00000111846	Q8N0V5	GCNT2	glucosaminyl (N-acetyl) transferase 2, I-branching enzyme (I blood group)	2.051	1.037	9.38807e-07	3.03659e-05
ENSG00000168461	Q13636	RAB31	RAB31, member RAS oncogene family	2.05	1.036	7.42055e-06	0.000185051
ENSG00000175197	P35638	DDIT3	DNA damage inducible transcript 3	2.047	1.034	7.98052e-06	0.000195499
ENSG00000243927	P82932	MRPS6	mitochondrial ribosomal protein S6	2.048	1.034	4.17427e-08	1.89556e-06
ENSG00000006534	P43353	ALDH3B1	aldehyde dehydrogenase 3 family member B1	2.046	1.033	0.000339077	0.00433177
ENSG00000182118	Q96GI7	FAM89A	family with sequence similarity 89 member A	2.047	1.033	2.21288e-05	0.00046348
ENSG00000146278	Q12796	PNRC1	proline rich nuclear receptor coactivator 1	2.047	1.033	8.60174e-06	0.000208507
ENSG00000137101	P21854	CD72	CD72 molecule	2.042	1.03	0.000524386	0.00612058
ENSG00000117394	P11166	SLC2A1	solute carrier family 2 (facilitated glucose transporter), member 1	2.041	1.029	6.71564e-06	0.000169505
ENSG00000154721	P57087	JAM2	junctional adhesion molecule 2	2.035	1.025	0.0050366	0.035533
ENSG00000018189	Q7L099	RUFY3	RUN and FYVE domain containing 3	2.033	1.024	1.59472e-06	4.82573e-05
ENSG00000104998	Q6UWB1	IL27RA	interleukin 27 receptor subunit alpha	2.032	1.023	1.79277e-06	5.32657e-05
ENSG00000110218	Q96RD7	PANX1	pannexin 1	2.032	1.023	1.90183e-07	7.33846e-06
ENSG00000142920	Q96A70	AZIN2	antizyme inhibitor 2	2.018	1.013	0.00663873	0.0435422
ENSG00000182389	O00305	CACNB4	calcium channel, voltage-dependent, beta 4 subunit	2.019	1.013	0.00479652	0.0341754
ENSG00000116711	P47712	PLA2G4A	phospholipase A2 group IVA	2.017	1.012	0.00131824	0.0127506
ENSG00000162772	P18847	ATF3	activating transcription factor 3	2.015	1.011	7.42847e-10	4.84318e-08
ENSG00000139946	Q9HAT8	PELI2	pellino E3 ubiquitin protein ligase family member 2	2.015	1.011	0.00158773	0.0146157
ENSG00000138411	Q9P2P5	HECW2	HECT, C2 and WW domain containing E3 ubiquitin protein ligase 2	2.013	1.01	4.46625e-05	0.000816966
ENSG00000170703	Q8N841	TTLL6	tubulin tyrosine ligase like 6	2.011	1.008	0.000157961	0.00234327
ENSG00000173281	Q86XI6	PPP1R3B	protein phosphatase 1 regulatory subunit 3B	2.01	1.007	0.000175205	0.00254309
ENSG00000138685	P09038	FGF2	fibroblast growth factor 2 (basic)	2.001	1.001	2.92085e-06	8.15408e-05
ENSG00000166046	Q8N4U5	TCP11L2	t-complex 11, testis-specific-like 2	2.002	1.001	0.00124889	0.012229
ENSG00000112715	P15692	VEGFA	vascular endothelial growth factor A	1.999	0.999	3.63389e-05	0.000686044
ENSG00000184254	P47895	ALDH1A3	aldehyde dehydrogenase 1 family member A3	1.996	0.997	0.000272949	0.00364598
ENSG00000198807	P55771	PAX9	paired box 9	1.995	0.997	5.33896e-05	0.000949058
ENSG00000118985	O00472	ELL2	elongation factor, RNA polymerase II, 2	1.994	0.996	9.50369e-14	1.16957e-11
ENSG00000151151	Q8NFU5	IPMK	inositol polyphosphate multikinase	1.994	0.996	4.25725e-08	1.92903e-06
ENSG00000179604	Q9H3Q1	CDC42EP4	CDC42 effector protein (Rho GTPase binding) 4	1.99	0.993	1.31352e-10	1.00068e-08
ENSG00000105355	O60664	PLIN3	perilipin 3	1.99	0.993	4.65556e-09	2.62402e-07
ENSG00000197956	P06703	S100A6	S100 calcium binding protein A6	1.99	0.993	5.99012e-05	0.00104583
ENSG00000162783	Q5VY09	IER5	immediate early response 5	1.989	0.992	2.67038e-08	1.25976e-06
ENSG00000135218	P16671	CD36	CD36 molecule (thrombospondin receptor)	1.987	0.991	0.00670517	0.0439364
ENSG00000049860	P07686	HEXB	hexosaminidase B (beta polypeptide)	1.987	0.991	3.41814e-11	2.87815e-09
ENSG00000147378	Q969F0	FATE1	fetal and adult testis expressed 1	1.987	0.99	6.54609e-10	4.3084e-08
ENSG00000185088	Q71UM5	RPS27L	ribosomal protein S27 like	1.987	0.99	2.05784e-09	1.25143e-07
ENSG00000090530	Q8IVL5	P3H2	prolyl 3-hydroxylase 2	1.984	0.989	0.000745023	0.0080661
ENSG00000163393	Q8IZD6	SLC22A15	solute carrier family 22 member 15	1.985	0.989	0.000353742	0.00448332
ENSG00000256235	Q9BZL3	SMIM3	small integral membrane protein 3	1.985	0.989	2.61729e-05	0.000525429
ENSG00000138190	Q8TAG9	EXOC6	exocyst complex component 6	1.984	0.988	3.00618e-06	8.35863e-05
ENSG00000106034	A4D0V7	CPED1	cadherin-like and PC-esterase domain containing 1	1.982	0.987	2.31015e-07	8.70409e-06
ENSG00000198355	Q86V86	PIM3	Pim-3 proto-oncogene, serine/threonine kinase	1.98	0.986	7.65556e-11	6.054e-09
ENSG00000101665	O15105	SMAD7	SMAD family member 7	1.979	0.985	1.03803e-06	3.31626e-05
ENSG00000036054	Q9NUY8	TBC1D23	TBC1 domain family member 23	1.976	0.983	2.07186e-11	1.81052e-09
ENSG00000137752	P29466	CASP1	caspase 1	1.976	0.982	6.14626e-07	2.08872e-05
ENSG00000102547	Q9H9S4	CAB39L	calcium binding protein 39 like	1.97	0.978	1.22043e-07	4.93824e-06
ENSG00000184371	P09603	CSF1	colony stimulating factor 1 (macrophage)	1.968	0.977	5.49376e-05	0.000972418
ENSG00000105339	A2RUS2	DENND3	DENN/MADD domain containing 3	1.967	0.976	6.64861e-05	0.00113976
ENSG00000023902	Q53GL0	PLEKHO1	pleckstrin homology domain containing O1	1.964	0.974	1.25418e-10	9.58989e-09
ENSG00000152952	O00469	PLOD2	procollagen-lysine, 2-oxoglutarate 5-dioxygenase 2	1.96	0.971	5.05922e-06	0.000132188
ENSG00000068366	O60488	ACSL4	acyl-CoA synthetase long-chain family member 4	1.954	0.967	1.16759e-07	4.75265e-06
ENSG00000238243	Q7Z3T1	OR2W3	olfactory receptor family 2 subfamily W member 3	1.955	0.967	0.00344134	0.0265675
ENSG00000110911	P49281	SLC11A2	solute carrier family 11 (proton-coupled divalent metal ion transporter), member 2	1.954	0.966	4.27704e-10	2.92611e-08
ENSG00000148926	P35318	ADM	adrenomedullin	1.953	0.965	1.7446e-06	5.20576e-05
ENSG00000171385	Q9UK17	KCND3	potassium channel, voltage gated Shal related subfamily D, member 3	1.951	0.964	0.000184589	0.00264035
ENSG00000163660	Q9UK58	CCNL1	cyclin L1	1.949	0.963	1.58069e-05	0.000351232
ENSG00000140511	Q96S86	HAPLN3	hyaluronan and proteoglycan link protein 3	1.949	0.963	0.0048915	0.0347331
ENSG00000131389	P31641	SLC6A6	solute carrier family 6 (neurotransmitter transporter), member 6	1.95	0.963	0.00141112	0.0134379
ENSG00000057252	P35610	SOAT1	sterol O-acyltransferase 1	1.948	0.962	3.71986e-06	0.000101264
ENSG00000003436	P10646	TFPI	tissue factor pathway inhibitor	1.945	0.96	0.000187288	0.00267161
ENSG00000115594	P14778	IL1R1	interleukin 1 receptor, type I	1.944	0.959	3.61168e-05	0.000682871
ENSG00000185022	Q9ULX9	MAFF	v-maf avian musculoaponeurotic fibrosarcoma oncogene homolog F	1.944	0.959	0.00357883	0.0273985
ENSG00000108639	O43760	SYNGR2	synaptogyrin 2	1.941	0.957	7.02458e-05	0.00118585
ENSG00000125846	P52736	ZNF133	zinc finger protein 133	1.942	0.957	3.34901e-05	0.00064733
ENSG00000162702	Q9Y2X9	ZNF281	zinc finger protein 281	1.941	0.957	3.5302e-08	1.62436e-06
ENSG00000100342	O14791	APOL1	apolipoprotein L1	1.94	0.956	8.8888e-05	0.00143867
ENSG00000147324	Q9Y4C4	MFHAS1	malignant fibrous histiocytoma amplified sequence 1	1.938	0.955	6.04489e-10	4.00387e-08
ENSG00000138347	Q86TC9	MYPN	myopalladin	1.939	0.955	0.00026885	0.00360048
ENSG00000082996	O43567	RNF13	ring finger protein 13	1.938	0.955	9.89026e-09	5.30149e-07
ENSG00000186577	Q86T20	C6orf1	chromosome 6 open reading frame 1	1.936	0.953	6.78298e-06	0.00017079
ENSG00000176697	P23560	BDNF	brain-derived neurotrophic factor	1.935	0.952	0.000478602	0.00568798
ENSG00000186314	Q8N945	PRELID2	PRELI domain containing 2	1.933	0.951	0.00065816	0.00732001
ENSG00000164674	Q4VX76	SYTL3	synaptotagmin like 3	1.933	0.951	3.75199e-05	0.000703007
ENSG00000104689	O00220	TNFRSF10A	tumor necrosis factor receptor superfamily member 10a	1.934	0.951	0.00390465	0.0293491
ENSG00000164683	Q9Y5J3	HEY1	hes-related family bHLH transcription factor with YRPW motif 1	1.931	0.949	0.00204509	0.0178413
ENSG00000135318	P21589	NT5E	5'-nucleotidase, ecto (CD73)	1.929	0.948	1.97146e-05	0.000419676
ENSG00000142657	P52209	PGD	phosphogluconate dehydrogenase	1.926	0.946	1.33432e-08	6.9205e-07
ENSG00000139567	P37023	ACVRL1	activin A receptor type IL	1.925	0.945	0.000315975	0.00410215
ENSG00000115641	Q14192	FHL2	four and a half LIM domains 2	1.924	0.944	6.60788e-06	0.000167737
ENSG00000177106	Q9H6S3	EPS8L2	EPS8-like 2	1.922	0.943	4.60761e-05	0.000839134
ENSG00000051620	Q9Y5Z4	HEBP2	heme binding protein 2	1.923	0.943	2.8696e-05	0.000569484
ENSG00000205364	Q8N339	MT1M	metallothionein 1M	1.918	0.939	7.92964e-05	0.00130578
ENSG00000177156	P37837	TALDO1	transaldolase 1	1.913	0.936	7.35856e-05	0.00122729
ENSG00000026950	O00481	BTN3A1	butyrophilin subfamily 3 member A1	1.911	0.934	3.16446e-10	2.231e-08
ENSG00000141682	Q13794	PMAIP1	phorbol-12-myristate-13-acetate-induced protein 1	1.91	0.934	0.00406175	0.0301809
ENSG00000126778	Q15475	SIX1	SIX homeobox 1	1.911	0.934	1.82575e-06	5.41681e-05
ENSG00000168899	O95183	VAMP5	vesicle associated membrane protein 5	1.911	0.934	6.00002e-06	0.000154441
ENSG00000235034	C9J6K1	C19orf81	chromosome 19 open reading frame 81	1.909	0.933	0.00187054	0.0166729
ENSG00000154096	P04216	THY1	Thy-1 cell surface antigen	1.91	0.933	2.13381e-06	6.20684e-05
ENSG00000099860	O75293	GADD45B	growth arrest and DNA damage inducible beta	1.908	0.932	0.000515342	0.00604204
ENSG00000129667	Q6PJF5	RHBDF2	rhomboid 5 homolog 2 (Drosophila)	1.907	0.931	1.67389e-05	0.000368788
ENSG00000146859	Q9NV12	TMEM140	transmembrane protein 140	1.905	0.929	1.52992e-06	4.65193e-05
ENSG00000100196	O43731	KDELR3	KDEL endoplasmic reticulum protein retention receptor 3	1.901	0.927	0.000365014	0.00458981
ENSG00000117143	Q16222	UAP1	UDP-N-acetylglucosamine pyrophosphorylase 1	1.901	0.927	4.07541e-07	1.45237e-05
ENSG00000119899	Q9NRA2	SLC17A5	solute carrier family 17 (acidic sugar transporter), member 5	1.898	0.925	1.00331e-05	0.000237934
ENSG00000105755	O95571	ETHE1	ethylmalonic encephalopathy 1	1.896	0.923	7.76586e-06	0.000191822
ENSG00000185532	Q13976	PRKG1	protein kinase, cGMP-dependent, type I	1.893	0.921	1.67082e-05	0.000368501
ENSG00000001630	Q16850	CYP51A1	cytochrome P450 family 51 subfamily A member 1	1.892	0.92	0.000835135	0.00888447
ENSG00000119950	P50539	MXI1	MAX interactor 1, dimerization protein	1.892	0.92	0.00397305	0.0297129
ENSG00000205221	Q6UXI7	VIT	vitrin	1.888	0.917	0.00225797	0.0192441
ENSG00000102554	Q13887	KLF5	Kruppel-like factor 5 (intestinal)	1.887	0.916	0.000412472	0.00502554
ENSG00000086300	Q9Y5X0	SNX10	sorting nexin 10	1.887	0.916	0.000184358	0.00263953
ENSG00000147509	O76081	RGS20	regulator of G-protein signaling 20	1.885	0.915	2.41285e-05	0.000493435
ENSG00000154589	Q9Y6Y9	LY96	lymphocyte antigen 96	1.883	0.913	0.00145563	0.0137391
ENSG00000114796	Q6TFL4	KLHL24	kelch like family member 24	1.881	0.911	0.00720235	0.0462186
ENSG00000127952	Q9Y6J8	STYXL1	serine/threonine/tyrosine interacting-like 1	1.88	0.911	3.53982e-05	0.000671726
ENSG00000140280	Q8IV50	LYSMD2	LysM, putative peptidoglycan-binding, domain containing 2	1.878	0.91	0.000315945	0.00410215
ENSG00000039560	Q9P0K7	RAI14	retinoic acid induced 14	1.88	0.91	0.000413295	0.00502862
ENSG00000188015	P33764	S100A3	S100 calcium binding protein A3	1.88	0.91	0.00495474	0.0350744
ENSG00000023330	P13196	ALAS1	5'-aminolevulinate synthase 1	1.878	0.909	3.28972e-09	1.92732e-07
ENSG00000131732	Q8N567	ZCCHC9	zinc finger, CCHC domain containing 9	1.875	0.907	4.84174e-08	2.15629e-06
ENSG00000132801	Q96MP5	ZSWIM3	zinc finger, SWIM-type containing 3	1.875	0.907	0.000468345	0.00557244
ENSG00000153823	Q7Z2X4	PID1	phosphotyrosine interaction domain containing 1	1.872	0.905	1.91845e-05	0.000411339
ENSG00000124145	P31431	SDC4	syndecan 4	1.873	0.905	5.60048e-05	0.000987945
ENSG00000224501	P0DMV9	HSPA1B	heat shock protein family A (Hsp70) member 1B	1.87	0.903	0.000546791	0.00633132
ENSG00000164463	Q8IUR6	CREBRF	CREB3 regulatory factor	1.869	0.902	7.55298e-08	3.2456e-06
ENSG00000104765	O60238	BNIP3L	BCL2/adenovirus E1B 19kDa interacting protein 3-like	1.867	0.901	1.96311e-06	5.7831e-05
ENSG00000067082	Q99612	KLF6	Kruppel-like factor 6	1.865	0.899	5.09484e-06	0.000132952
ENSG00000023608	Q16533	SNAPC1	small nuclear RNA activating complex polypeptide 1	1.862	0.897	1.41077e-06	4.34684e-05
ENSG00000150051	Q8IYA7	MKX	mohawk homeobox	1.859	0.894	8.57319e-09	4.66768e-07
ENSG00000184363	Q9Y446	PKP3	plakophilin 3	1.858	0.894	0.00154037	0.0142957
ENSG00000163947	Q9NR81	ARHGEF3	Rho guanine nucleotide exchange factor 3	1.857	0.893	0.00106593	0.010788
ENSG00000157224	P56749	CLDN12	claudin 12	1.857	0.893	3.52599e-09	2.05993e-07
ENSG00000135378	Q9BZD6	PRRG4	proline rich Gla (G-carboxyglutamic acid) 4 (transmembrane)	1.857	0.893	4.88238e-05	0.000879929
ENSG00000139192	Q9BX59	TAPBPL	TAP binding protein-like	1.853	0.89	0.000165858	0.00243437
ENSG00000198743	P53794	SLC5A3	solute carrier family 5 (sodium/myo-inositol cotransporter), member 3	1.852	0.889	0.000324082	0.0041813
ENSG00000168734	Q9Y2B9	PKIG	protein kinase (cAMP-dependent, catalytic) inhibitor gamma	1.85	0.887	2.27115e-05	0.00047425
ENSG00000158470	O43286	B4GALT5	UDP-Gal:betaGlcNAc beta 1,4- galactosyltransferase, polypeptide 5	1.848	0.886	7.09077e-11	5.62877e-09
ENSG00000128590	Q9UBS3	DNAJB9	DnaJ heat shock protein family (Hsp40) member B9	1.849	0.886	0.00028533	0.003775
ENSG00000110031	O60711	LPXN	leupaxin	1.848	0.886	8.40262e-10	5.42726e-08
ENSG00000181004	Q6ZW61	BBS12	Bardet-Biedl syndrome 12	1.846	0.884	7.30564e-05	0.0012198
ENSG00000034510	P63313	TMSB10	thymosin beta 10	1.846	0.884	0.000397358	0.00488143
ENSG00000173276	Q9ULJ3	ZBTB21	zinc finger and BTB domain containing 21	1.845	0.884	4.03538e-06	0.000108856
ENSG00000170745	Q9BQ31	KCNS3	potassium voltage-gated channel, modifier subfamily S, member 3	1.844	0.883	7.83941e-06	0.00019297
ENSG00000198832		SELM	selenoprotein M	1.844	0.883	0.00455383	0.0328742
ENSG00000076053	Q9Y580	RBM7	RNA binding motif protein 7	1.842	0.882	4.31537e-07	1.53159e-05
ENSG00000275074	Q6ZVK8	NUDT18	nudix hydrolase 18	1.841	0.881	7.51531e-05	0.00124943
ENSG00000164211	Q96DR4	STARD4	StAR related lipid transfer domain containing 4	1.841	0.881	9.0591e-08	3.79097e-06
ENSG00000073331	Q96QP1	ALPK1	alpha kinase 1	1.84	0.88	0.000123144	0.00189015
ENSG00000163710	Q9UKZ9	PCOLCE2	procollagen C-endopeptidase enhancer 2	1.84	0.88	5.07783e-05	0.000908854
ENSG00000198018	Q9NQZ7	ENTPD7	ectonucleoside triphosphate diphosphohydrolase 7	1.839	0.879	3.48753e-06	9.59439e-05
ENSG00000134954	P14921	ETS1	v-ets avian erythroblastosis virus E26 oncogene homolog 1	1.84	0.879	3.09703e-05	0.000605946
ENSG00000177989	A8MYP8	ODF3B	outer dense fiber of sperm tails 3B	1.83	0.872	0.0030006	0.0240117
ENSG00000141574	Q8WVN6	SECTM1	secreted and transmembrane 1	1.828	0.87	7.6983e-08	3.29443e-06
ENSG00000182197	Q16394	EXT1	exostosin glycosyltransferase 1	1.827	0.869	2.12321e-07	8.11736e-06
ENSG00000168310	P14316	IRF2	interferon regulatory factor 2	1.826	0.869	1.30887e-09	8.17475e-08
ENSG00000170525	Q16875	PFKFB3	6-phosphofructo-2-kinase/fructose-2,6-biphosphatase 3	1.825	0.868	2.07226e-07	7.94655e-06
ENSG00000169372	P78560	CRADD	CASP2 and RIPK1 domain containing adaptor with death domain	1.824	0.867	3.89693e-06	0.000105532
ENSG00000149289	Q9C0D7	ZC3H12C	zinc finger CCCH-type containing 12C	1.824	0.867	2.32684e-08	1.11764e-06
ENSG00000126106	Q6P2H8	TMEM53	transmembrane protein 53	1.823	0.866	0.000236608	0.00323961
ENSG00000060138	P16989	YBX3	Y-box binding protein 3	1.823	0.866	6.60026e-09	3.64117e-07
ENSG00000133639	P62324	BTG1	B-cell translocation gene 1, anti-proliferative	1.822	0.865	2.45535e-05	0.00050016
ENSG00000132357	Q9BX69	CARD6	caspase recruitment domain family member 6	1.821	0.865	3.10977e-09	1.83741e-07
ENSG00000069011	P78337	PITX1	paired-like homeodomain 1	1.822	0.865	1.41692e-08	7.25842e-07
ENSG00000131981	P17931	LGALS3	lectin, galactoside-binding, soluble, 3	1.82	0.864	0.000115579	0.00179122
ENSG00000168404	Q8NB16	MLKL	mixed lineage kinase domain-like	1.82	0.864	9.05381e-05	0.00146025
ENSG00000130958	Q76EJ3	SLC35D2	solute carrier family 35 (UDP-GlcNAc/UDP-glucose transporter), member D2	1.817	0.862	2.99001e-05	0.000588327
ENSG00000163755	Q969F9	HPS3	Hermansky-Pudlak syndrome 3	1.816	0.861	2.76708e-07	1.02584e-05
ENSG00000168961	O00182	LGALS9	lectin, galactoside-binding, soluble, 9	1.816	0.861	0.00717689	0.0461121
ENSG00000088298	Q9BV94	EDEM2	ER degradation enhancer, mannosidase alpha-like 2	1.81	0.856	3.74394e-07	1.34253e-05
ENSG00000253958	Q96B33	CLDN23	claudin 23	1.808	0.855	7.86624e-07	2.60099e-05
ENSG00000104365	O14920	IKBKB	inhibitor of kappa light polypeptide gene enhancer in B-cells, kinase beta	1.808	0.855	3.10274e-06	8.60319e-05
ENSG00000171223	P17275	JUNB	jun B proto-oncogene	1.808	0.855	0.00238721	0.0201172
ENSG00000184661	Q69YH5	CDCA2	cell division cycle associated 2	1.806	0.853	0.00806284	0.0499526
ENSG00000159128	P38484	IFNGR2	interferon gamma receptor 2 (interferon gamma transducer 1)	1.806	0.853	0.00660028	0.0433584
ENSG00000152256	Q15118	PDK1	pyruvate dehydrogenase kinase, isozyme 1	1.807	0.853	4.59287e-08	2.05868e-06
ENSG00000083857	Q14517	FAT1	FAT atypical cadherin 1	1.804	0.851	1.23126e-06	3.85937e-05
ENSG00000132031	O15232	MATN3	matrilin 3	1.802	0.85	0.0074307	0.0472611
ENSG00000126458	P10301	RRAS	related RAS viral (r-ras) oncogene homolog	1.802	0.85	0.000251395	0.00339514
ENSG00000184451	P46092	CCR10	chemokine (C-C motif) receptor 10	1.801	0.849	0.00559643	0.0385413
ENSG00000151748	Q9H4B6	SAV1	salvador family WW domain containing protein 1	1.8	0.848	8.88321e-09	4.81128e-07
ENSG00000164442	Q99967	CITED2	Cbp/p300-interacting transactivator, with Glu/Asp rich carboxy-terminal domain, 2	1.799	0.847	1.45847e-06	4.47392e-05
ENSG00000155962	O15247	CLIC2	chloride intracellular channel 2	1.796	0.845	0.000214925	0.002998
ENSG00000161638	P08648	ITGA5	integrin subunit alpha 5	1.797	0.845	1.39434e-08	7.16037e-07
ENSG00000166128	Q92930	RAB8B	RAB8B, member RAS oncogene family	1.796	0.845	9.69323e-06	0.00023145
ENSG00000188659	Q658L1	SAXO2	stabilizer of axonemal microtubules 2	1.795	0.844	0.00777946	0.0486901
ENSG00000074800	P06733	ENO1	enolase 1, (alpha)	1.794	0.843	0.00125183	0.0122462
ENSG00000033867	Q9Y6M7	SLC4A7	solute carrier family 4, sodium bicarbonate cotransporter, member 7	1.793	0.842	2.65534e-08	1.25799e-06
ENSG00000132541	P52758	HRSP12	heat-responsive protein 12	1.789	0.839	2.6712e-08	1.25976e-06
ENSG00000180611	Q8IYB1	MB21D2	Mab-21 domain containing 2	1.789	0.839	0.00640352	0.0423306
ENSG00000139211	Q86SJ2	AMIGO2	adhesion molecule with Ig-like domain 2	1.787	0.838	0.00704503	0.0456314
ENSG00000168398	P30411	BDKRB2	bradykinin receptor B2	1.786	0.837	3.86244e-05	0.000720262
ENSG00000145901	Q15025	TNIP1	TNFAIP3 interacting protein 1	1.786	0.837	1.73254e-05	0.000378502
ENSG00000177674	Q6RW13	AGTRAP	angiotensin II receptor-associated protein	1.785	0.836	1.09517e-06	3.46689e-05
ENSG00000133740	Q15329	E2F5	E2F transcription factor 5, p130-binding	1.784	0.835	7.46525e-07	2.47233e-05
ENSG00000119917	O14879	IFIT3	interferon induced protein with tetratricopeptide repeats 3	1.783	0.835	2.74344e-05	0.000547582
ENSG00000141934	O43688	PLPP2	phospholipid phosphatase 2	1.784	0.835	3.26664e-06	9.02251e-05
ENSG00000170677	O14544	SOCS6	suppressor of cytokine signaling 6	1.784	0.835	4.78086e-10	3.22832e-08
ENSG00000131094	O75973	C1QL1	complement component 1, q subcomponent-like 1	1.783	0.834	2.39395e-05	0.000490535
ENSG00000154127	Q8TF42	UBASH3B	ubiquitin associated and SH3 domain containing B	1.783	0.834	0.00255056	0.0211678
ENSG00000105991	P49639	HOXA1	homeobox A1	1.778	0.831	0.00702363	0.045507
ENSG00000136040	O60486	PLXNC1	plexin C1	1.778	0.831	0.00213295	0.0183995
ENSG00000169902	O60507	TPST1	tyrosylprotein sulfotransferase 1	1.779	0.831	1.56319e-08	7.87194e-07
ENSG00000147119	Q9NS84	CHST7	carbohydrate (N-acetylglucosamine 6-O) sulfotransferase 7	1.777	0.83	0.000521739	0.00609957
ENSG00000151012	Q9UPY5	SLC7A11	solute carrier family 7 (anionic amino acid transporter light chain, xc- system), member 11	1.775	0.828	3.11878e-06	8.62557e-05
ENSG00000105518	Q6UW68	TMEM205	transmembrane protein 205	1.775	0.827	8.67373e-05	0.00140605
ENSG00000096968	O60674	JAK2	Janus kinase 2	1.772	0.826	9.48943e-06	0.000227375
ENSG00000106605	P53004	BLVRA	biliverdin reductase A	1.772	0.825	3.00198e-07	1.10505e-05
ENSG00000151883	Q8N3A8	PARP8	poly(ADP-ribose) polymerase family member 8	1.771	0.825	1.46391e-06	4.47742e-05
ENSG00000078269	O15056	SYNJ2	synaptojanin 2	1.772	0.825	0.000440384	0.00529122
ENSG00000140743	Q01850	CDR2	cerebellar degeneration related protein 2	1.77	0.824	4.47959e-09	2.54553e-07
ENSG00000137691	Q9BRQ4	C11orf70	chromosome 11 open reading frame 70	1.769	0.823	0.00198116	0.0174225
ENSG00000067057	Q01813	PFKP	phosphofructokinase, platelet	1.769	0.823	0.00150039	0.0140437
ENSG00000100902	P60900	PSMA6	proteasome subunit alpha 6	1.769	0.823	0.000107643	0.00168835
ENSG00000174327	Q7RTY0	SLC16A13	solute carrier family 16 member 13	1.769	0.823	0.00791694	0.0493427
ENSG00000174059	P28906	CD34	CD34 molecule	1.766	0.821	3.37384e-05	0.000649715
ENSG00000178695	Q96CX2	KCTD12	potassium channel tetramerization domain containing 12	1.766	0.821	5.4328e-05	0.000962448
ENSG00000110080	Q11206	ST3GAL4	ST3 beta-galactoside alpha-2,3-sialyltransferase 4	1.766	0.821	0.000201559	0.00284012
ENSG00000117500	Q9Y3A6	TMED5	transmembrane p24 trafficking protein 5	1.767	0.821	5.73962e-07	1.9731e-05
ENSG00000166483	P30291	WEE1	WEE1 G2 checkpoint kinase	1.767	0.821	3.43642e-05	0.000658716
ENSG00000123094	Q8NHQ8	RASSF8	Ras association (RalGDS/AF-6) domain family (N-terminal) member 8	1.765	0.82	3.10224e-08	1.44665e-06
ENSG00000137720	Q9H5F2	C11orf1	chromosome 11 open reading frame 1	1.764	0.819	0.000826887	0.00880573
ENSG00000258839	Q01726	MC1R	melanocortin 1 receptor (alpha melanocyte stimulating hormone receptor)	1.764	0.819	1.20093e-05	0.000278139
ENSG00000157110	Q93062	RBPMS	RNA binding protein with multiple splicing	1.765	0.819	5.01462e-05	0.000899863
ENSG00000138675	P12034	FGF5	fibroblast growth factor 5	1.762	0.818	0.00282549	0.0229998
ENSG00000188290	Q9HCC6	HES4	hes family bHLH transcription factor 4	1.763	0.818	0.000898845	0.00942722
ENSG00000085662	P15121	AKR1B1	aldo-keto reductase family 1, member B1 (aldose reductase)	1.762	0.817	1.28931e-07	5.18668e-06
ENSG00000085365	O15126	SCAMP1	secretory carrier membrane protein 1	1.762	0.817	1.10035e-06	3.47799e-05
ENSG00000105329	P01137	TGFB1	transforming growth factor beta 1	1.762	0.817	0.000297655	0.00389347
ENSG00000160570	Q8WXF8	DEDD2	death effector domain containing 2	1.76	0.816	4.40791e-06	0.000117684
ENSG00000163512	Q9H6S1	AZI2	5-azacytidine induced 2	1.759	0.815	1.2612e-07	5.09328e-06
ENSG00000246705	Q9BTM1	H2AFJ	H2A histone family member J	1.759	0.815	0.000295449	0.00386948
ENSG00000168275	Q5JTJ3	COA6	cytochrome c oxidase assembly factor 6	1.758	0.814	0.000708364	0.00775397
ENSG00000121749	Q8TC07	TBC1D15	TBC1 domain family member 15	1.758	0.814	1.46962e-07	5.85541e-06
ENSG00000123810	Q9BPU9	B9D2	B9 protein domain 2	1.755	0.811	8.49761e-07	2.78759e-05
ENSG00000051523	P13498	CYBA	cytochrome b-245, alpha polypeptide	1.755	0.811	0.00382469	0.0288105
ENSG00000198431	Q16881	TXNRD1	thioredoxin reductase 1	1.751	0.808	0.000825099	0.0087957
ENSG00000139793	Q5VZF2	MBNL2	muscleblind-like splicing regulator 2	1.749	0.806	7.36832e-06	0.000184412
ENSG00000189171	Q99584	S100A13	S100 calcium binding protein A13	1.748	0.806	8.17754e-05	0.00134195
ENSG00000197930	Q96HE7	ERO1A	endoplasmic reticulum oxidoreductase alpha	1.747	0.805	0.000132184	0.00200962
ENSG00000154511	Q5T7M9	FAM69A	family with sequence similarity 69 member A	1.745	0.803	0.000111358	0.00173687
ENSG00000100625	Q9UIU6	SIX4	SIX homeobox 4	1.745	0.803	6.02119e-06	0.000154603
ENSG00000089775	P24278	ZBTB25	zinc finger and BTB domain containing 25	1.745	0.803	0.00044472	0.00533715
ENSG00000114573	P38606	ATP6V1A	ATPase, H+ transporting, lysosomal 70kDa, V1 subunit A	1.742	0.801	2.28088e-05	0.000474852
ENSG00000198189	Q8NBQ5	HSD17B11	hydroxysteroid (17-beta) dehydrogenase 11	1.741	0.8	9.76284e-05	0.00155831
ENSG00000166710	P61769	B2M	beta-2-microglobulin	1.74	0.799	0.00100466	0.0102931
ENSG00000171552	Q07817	BCL2L1	BCL2-like 1	1.737	0.797	4.03637e-09	2.31263e-07
ENSG00000147853	Q9UIJ7	AK3	adenylate kinase 3	1.735	0.795	2.37644e-05	0.00048791
ENSG00000165322	Q8IWW6	ARHGAP12	Rho GTPase activating protein 12	1.733	0.793	3.28005e-05	0.000637555
ENSG00000163001	Q96G28	CFAP36	cilia and flagella associated protein 36	1.732	0.793	7.23733e-05	0.00121487
ENSG00000024862	Q8IWP9	CCDC28A	coiled-coil domain containing 28A	1.731	0.791	0.000142237	0.00214521
ENSG00000160888	Q9BTL4	IER2	immediate early response 2	1.729	0.79	0.00748825	0.0474761
ENSG00000113732	O15342	ATP6V0E1	ATPase, H+ transporting, lysosomal 9kDa, V0 subunit e1	1.728	0.789	2.36618e-05	0.000486764
ENSG00000146950	Q13796	SHROOM2	shroom family member 2	1.726	0.788	1.10419e-07	4.51176e-06
ENSG00000146409	Q6NT16	SLC18B1	solute carrier family 18, subfamily B, member 1	1.726	0.787	3.30399e-06	9.11299e-05
ENSG00000137364	P51580	TPMT	thiopurine S-methyltransferase	1.726	0.787	0.000564008	0.00647774
ENSG00000156521	Q2T9J0	TYSND1	trypsin domain containing 1	1.724	0.786	2.29089e-05	0.000475983
ENSG00000137575	O00560	SDCBP	syndecan binding protein	1.723	0.785	2.53861e-08	1.20819e-06
ENSG00000110693	P35712	SOX6	SRY-box 6	1.723	0.785	0.00774818	0.0485739
ENSG00000205309	Q9NPB1	NT5M	5',3'-nucleotidase, mitochondrial	1.721	0.784	0.00239989	0.0201995
ENSG00000168234	Q8N584	TTC39C	tetratricopeptide repeat domain 39C	1.721	0.784	0.000253563	0.00341998
ENSG00000157326	Q9BTZ2	DHRS4	dehydrogenase/reductase (SDR family) member 4	1.721	0.783	0.00146772	0.0137876
ENSG00000102871	Q15628	TRADD	TNFRSF1A-associated via death domain	1.717	0.78	0.000123318	0.00189143
ENSG00000157557	P15036	ETS2	v-ets avian erythroblastosis virus E26 oncogene homolog 2	1.717	0.779	1.39966e-05	0.000316758
ENSG00000105327	Q96PG8	BBC3	BCL2 binding component 3	1.714	0.777	3.01772e-05	0.00059322
ENSG00000076067	Q15434	RBMS2	RNA binding motif, single stranded interacting protein 2	1.713	0.777	2.51217e-05	0.000508746
ENSG00000160190	P57057	SLC37A1	solute carrier family 37 (glucose-6-phosphate transporter), member 1	1.712	0.776	0.000178905	0.00258573
ENSG00000084070	Q8WU79	SMAP2	small ArfGAP2	1.712	0.776	6.32583e-07	2.14274e-05
ENSG00000196683	Q9P0U1	TOMM7	translocase of outer mitochondrial membrane 7 homolog (yeast)	1.712	0.776	0.000846766	0.0089944
ENSG00000108960	Q15546	MMD	monocyte to macrophage differentiation-associated	1.711	0.775	0.00132172	0.0127619
ENSG00000090013	P30043	BLVRB	biliverdin reductase B	1.71	0.774	0.000148133	0.00221805
ENSG00000027697	P15260	IFNGR1	interferon gamma receptor 1	1.71	0.774	7.39387e-06	0.00018477
ENSG00000116678	P48357	LEPR	leptin receptor	1.709	0.773	0.00107595	0.0108617
ENSG00000133315	Q9BQ69	MACROD1	MACRO domain containing 1	1.709	0.773	0.000708801	0.00775468
ENSG00000147202	O60879	DIAPH2	diaphanous related formin 2	1.708	0.772	7.00228e-05	0.00118401
ENSG00000081019	Q5VWQ0	RSBN1	round spermatid basic protein 1	1.707	0.772	0.000518014	0.00605943
ENSG00000018408	Q9GZV5	WWTR1	WW domain containing transcription regulator 1	1.707	0.772	1.52125e-05	0.000340477
ENSG00000154639	P78310	CXADR	coxsackie virus and adenovirus receptor	1.707	0.771	0.00795471	0.0495484
ENSG00000150991	P0CG48	UBC	ubiquitin C	1.706	0.77	2.09714e-06	6.10872e-05
ENSG00000139083	P41212	ETV6	ets variant 6	1.703	0.768	0.00152005	0.0141747
ENSG00000113460	Q8TDN6	BRIX1	BRX1, biogenesis of ribosomes	1.702	0.767	0.000163578	0.00241112
ENSG00000125898	Q9BQ89	FAM110A	family with sequence similarity 110 member A	1.701	0.767	0.0005086	0.00598634
ENSG00000254087	P07948	LYN	LYN proto-oncogene, Src family tyrosine kinase	1.702	0.767	4.36166e-06	0.000116599
ENSG00000184584	Q86WV6	TMEM173	transmembrane protein 173	1.701	0.767	5.66782e-08	2.50807e-06
ENSG00000159885	Q9UK12	ZNF222	zinc finger protein 222	1.701	0.766	0.000500481	0.00591085
ENSG00000133874	Q9H9V4	RNF122	ring finger protein 122	1.699	0.765	0.000354964	0.00449531
ENSG00000179021	Q5JPI3	C3orf38	chromosome 3 open reading frame 38	1.698	0.764	1.31811e-05	0.000300264
ENSG00000196776	Q08722	CD47	CD47 molecule	1.698	0.764	4.43756e-05	0.000813149
ENSG00000173846	Q9H4B4	PLK3	polo-like kinase 3	1.698	0.764	0.000109642	0.00171196
ENSG00000179163	P04066	FUCA1	fucosidase, alpha-L- 1, tissue	1.695	0.761	0.00054747	0.00633132
ENSG00000010626	Q53EV4	LRRC23	leucine rich repeat containing 23	1.694	0.761	0.00107149	0.0108337
ENSG00000119979	Q8TCE6	FAM45A	family with sequence similarity 45 member A	1.693	0.76	8.07162e-05	0.00132706
ENSG00000170425	P29275	ADORA2B	adenosine A2b receptor	1.691	0.758	0.00580119	0.0395047
ENSG00000187630	Q6PKH6	DHRS4L2	dehydrogenase/reductase (SDR family) member 4 like 2	1.691	0.758	0.000379045	0.00471143
ENSG00000138413	O75874	IDH1	isocitrate dehydrogenase 1 (NADP+)	1.691	0.758	3.92832e-05	0.000730127
ENSG00000126790	Q96EM0	L3HYPDH	L-3-hydroxyproline dehydratase (trans-)	1.691	0.758	1.93385e-05	0.000413788
ENSG00000163931	P29401	TKT	transketolase	1.69	0.757	0.0027271	0.02233
ENSG00000041982	P24821	TNC	tenascin C	1.689	0.757	0.000892047	0.00938906
ENSG00000164733	P07858	CTSB	cathepsin B	1.689	0.756	0.00060867	0.00690623
ENSG00000170421	P05787	KRT8	keratin 8, type II	1.689	0.756	0.007058	0.045645
ENSG00000162814	Q96L03	SPATA17	spermatogenesis associated 17	1.689	0.756	0.00434206	0.0317421
ENSG00000109062	O14745	SLC9A3R1	solute carrier family 9, subfamily A (NHE3, cation proton antiporter 3), member 3 regulator 1	1.687	0.755	2.92072e-06	8.15408e-05
ENSG00000131373	Q9UJ83	HACL1	2-hydroxyacyl-CoA lyase 1	1.686	0.754	0.000622029	0.00700431
ENSG00000198959	P21980	TGM2	transglutaminase 2	1.686	0.754	0.000299746	0.00391837
ENSG00000196233	Q96JN0	LCOR	ligand dependent nuclear receptor corepressor	1.686	0.753	1.60899e-06	4.84983e-05
ENSG00000107438	O00151	PDLIM1	PDZ and LIM domain 1	1.685	0.753	8.48211e-05	0.00138253
ENSG00000100601	Q13686	ALKBH1	alkB homolog 1, histone H2A dioxygenase	1.684	0.752	6.86084e-05	0.00116578
ENSG00000134321	Q8WXG1	RSAD2	radical S-adenosyl methionine domain containing 2	1.684	0.752	0.000239639	0.00327035
ENSG00000159228	P16152	CBR1	carbonyl reductase 1	1.683	0.751	0.00247432	0.0206754
ENSG00000164136	P40933	IL15	interleukin 15	1.683	0.751	0.00364348	0.0277064
ENSG00000164327	Q6R327	RICTOR	RPTOR independent companion of MTOR, complex 2	1.683	0.751	4.30809e-08	1.94782e-06
ENSG00000138433	Q86X95	CIR1	corepressor interacting with RBPJ, 1	1.682	0.75	1.30873e-06	4.06254e-05
ENSG00000132823	Q9NX31	OSER1	oxidative stress responsive serine-rich 1	1.679	0.747	6.43717e-05	0.00110828
ENSG00000138640	O94988	FAM13A	family with sequence similarity 13 member A	1.675	0.745	4.42079e-06	0.000117876
ENSG00000162695	Q8NEW0	SLC30A7	solute carrier family 30 (zinc transporter), member 7	1.677	0.745	8.26312e-06	0.000201473
ENSG00000148120	Q8N6M6	C9orf3	chromosome 9 open reading frame 3	1.673	0.743	8.66008e-05	0.00140603
ENSG00000086065	Q9NZZ3	CHMP5	charged multivesicular body protein 5	1.673	0.743	1.13052e-05	0.000264483
ENSG00000115271	P28676	GCA	grancalcin	1.673	0.743	1.63249e-06	4.90644e-05
ENSG00000108187	P30039	PBLD	phenazine biosynthesis-like protein domain containing	1.674	0.743	9.64937e-06	0.000230675
ENSG00000233276	P07203	GPX1	glutathione peroxidase 1	1.673	0.742	0.000661152	0.0073415
ENSG00000174749	Q8N8J7	C4orf32	chromosome 4 open reading frame 32	1.672	0.741	0.000589051	0.0067224
ENSG00000105856	O60381	HBP1	HMG-box transcription factor 1	1.671	0.74	0.00721352	0.0462547
ENSG00000164823	Q9Y236	OSGIN2	oxidative stress induced growth inhibitor family member 2	1.667	0.738	3.53315e-05	0.000671073
ENSG00000116171	P22307	SCP2	sterol carrier protein 2	1.667	0.737	2.20055e-05	0.000461826
ENSG00000164117	Q9NRD0	FBXO8	F-box protein 8	1.666	0.736	3.35878e-05	0.000648616
ENSG00000073792	Q9Y6M1	IGF2BP2	insulin like growth factor 2 mRNA binding protein 2	1.665	0.736	3.0213e-05	0.000593362
ENSG00000150667	Q8NA03	FSIP1	fibrous sheath interacting protein 1	1.664	0.735	0.00146355	0.0137817
ENSG00000136542	Q7Z7M9	GALNT5	polypeptide N-acetylgalactosaminyltransferase 5	1.665	0.735	0.00109863	0.011065
ENSG00000119314	O95758	PTBP3	polypyrimidine tract binding protein 3	1.664	0.735	0.000185121	0.00264434
ENSG00000176597	Q9BYG0	B3GNT5	UDP-GlcNAc:betaGal beta-1,3-N-acetylglucosaminyltransferase 5	1.663	0.734	0.00293692	0.0236294
ENSG00000134245	Q93097	WNT2B	wingless-type MMTV integration site family member 2B	1.663	0.734	0.000152879	0.00227926
ENSG00000174808	P35070	BTC	betacellulin	1.662	0.733	8.62678e-05	0.00140172
ENSG00000148481	Q9H8M7	FAM188A	family with sequence similarity 188 member A	1.662	0.733	1.26609e-07	5.10311e-06
ENSG00000005486	Q6NTF9	RHBDD2	rhomboid domain containing 2	1.662	0.733	0.000547094	0.00633132
ENSG00000158092	P16333	NCK1	NCK adaptor protein 1	1.661	0.732	6.67702e-05	0.00114295
ENSG00000171204	Q8IUX1	TMEM126B	transmembrane protein 126B	1.661	0.732	7.03102e-05	0.00118598
ENSG00000174851	O95070	YIF1A	Yip1 interacting factor homolog A (S. cerevisiae)	1.66	0.732	0.00151694	0.0141604
ENSG00000137198	P36959	GMPR	guanosine monophosphate reductase	1.656	0.728	6.06495e-05	0.00105615
ENSG00000185475	Q7Z7N9	TMEM179B	transmembrane protein 179B	1.657	0.728	0.000184404	0.00263953
ENSG00000149925	P04075	ALDOA	aldolase, fructose-bisphosphate A	1.655	0.727	0.000750946	0.00811756
ENSG00000070501	P06746	POLB	polymerase (DNA directed), beta	1.653	0.725	0.000790182	0.00847998
ENSG00000141526	O15427	SLC16A3	solute carrier family 16 (monocarboxylate transporter), member 3	1.653	0.725	0.000207791	0.00291609
ENSG00000116044	Q16236	NFE2L2	nuclear factor, erythroid 2 like 2	1.652	0.724	6.3804e-08	2.79367e-06
ENSG00000184007	Q12974	PTP4A2	protein tyrosine phosphatase type IVA, member 2	1.65	0.723	1.53663e-05	0.000342906
ENSG00000149932	Q86XT9	TMEM219	transmembrane protein 219	1.651	0.723	0.00037249	0.00466409
ENSG00000182952	O00479	HMGN4	high mobility group nucleosomal binding domain 4	1.649	0.721	0.000174497	0.0025379
ENSG00000079739	P36871	PGM1	phosphoglucomutase 1	1.648	0.721	1.49132e-05	0.000335314
ENSG00000205352	Q9NZ81	PRR13	proline rich 13	1.648	0.72	4.87364e-05	0.000879767
ENSG00000124226	Q9Y508	RNF114	ring finger protein 114	1.648	0.72	2.04699e-06	5.9794e-05
ENSG00000156958	Q01415	GALK2	galactokinase 2	1.644	0.717	0.0010613	0.0107531
ENSG00000247626	Q96GW9	MARS2	methionyl-tRNA synthetase 2, mitochondrial	1.644	0.717	0.00796035	0.0495687
ENSG00000134056	P82909	MRPS36	mitochondrial ribosomal protein S36	1.642	0.716	0.00205462	0.0179129
ENSG00000233841		HLA-C	major histocompatibility complex, class I, C	1.641	0.714	0.000654612	0.00729224
ENSG00000229809	P0C7X2	ZNF688	zinc finger protein 688	1.639	0.713	0.000368754	0.00462827
ENSG00000156171	Q6UX65	DRAM2	DNA damage regulated autophagy modulator 2	1.638	0.712	0.00313422	0.0247291
ENSG00000182054	P48735	IDH2	isocitrate dehydrogenase 2 (NADP+), mitochondrial	1.638	0.712	0.000107215	0.00168291
ENSG00000171425	Q9P0T4	ZNF581	zinc finger protein 581	1.638	0.712	0.0073591	0.0469061
ENSG00000203797	Q99489	DDO	D-aspartate oxidase	1.636	0.71	0.00479639	0.0341754
ENSG00000122873	Q9NZ45	CISD1	CDGSH iron sulfur domain 1	1.634	0.709	0.00204119	0.0178148
ENSG00000130224	Q5VUJ6	LRCH2	leucine-rich repeats and calponin homology (CH) domain containing 2	1.635	0.709	0.00163742	0.0150022
ENSG00000173848	Q7Z628	NET1	neuroepithelial cell transforming 1	1.634	0.709	0.00146604	0.0137817
ENSG00000123349	Q99471	PFDN5	prefoldin subunit 5	1.63	0.705	0.00111635	0.0111947
ENSG00000114127	Q8IZH2	XRN1	5'-3' exoribonuclease 1	1.629	0.704	5.97945e-08	2.62919e-06
ENSG00000131069	Q9NR19	ACSS2	acyl-CoA synthetase short-chain family member 2	1.628	0.703	0.000815891	0.00872886
ENSG00000143303	Q96FB5	RRNAD1	ribosomal RNA adenine dimethylase domain containing 1	1.628	0.703	0.00219231	0.0187868
ENSG00000155096	O14977	AZIN1	antizyme inhibitor 1	1.626	0.702	1.86841e-05	0.000403105
ENSG00000171984	Q8IYI0	C20orf196	chromosome 20 open reading frame 196	1.626	0.701	0.00480554	0.0342046
ENSG00000139318	Q16828	DUSP6	dual specificity phosphatase 6	1.626	0.701	6.51083e-05	0.00111993
ENSG00000146648	P00533	EGFR	epidermal growth factor receptor	1.626	0.701	0.000154186	0.00229382
ENSG00000106617	Q9UGJ0	PRKAG2	protein kinase, AMP-activated, gamma 2 non-catalytic subunit	1.624	0.7	3.13963e-05	0.000613127
ENSG00000146282	Q5T160	RARS2	arginyl-tRNA synthetase 2, mitochondrial	1.624	0.7	2.27471e-05	0.000474519
ENSG00000069667	P35398	RORA	RAR-related orphan receptor A	1.624	0.7	0.000375138	0.00468878
ENSG00000136514	Q96DX8	RTP4	receptor (chemosensory) transporter protein 4	1.624	0.7	3.64532e-06	9.93649e-05
ENSG00000060642	Q9NUD9	PIGV	phosphatidylinositol glycan anchor biosynthesis class V	1.623	0.699	0.0055106	0.0380131
ENSG00000163050	Q8NI60	ADCK3	aarF domain containing kinase 3	1.623	0.698	0.00381422	0.0287629
ENSG00000125746	O95834	EML2	echinoderm microtubule associated protein like 2	1.623	0.698	5.62407e-05	0.000991266
ENSG00000187266	P19235	EPOR	erythropoietin receptor	1.622	0.698	0.00111187	0.0111684
ENSG00000125618	Q06710	PAX8	paired box 8	1.623	0.698	0.00705809	0.045645
ENSG00000131015	Q9BZM5	ULBP2	UL16 binding protein 2	1.622	0.698	0.00125587	0.0122742
ENSG00000138942	Q96GF1	RNF185	ring finger protein 185	1.621	0.697	1.23006e-05	0.000284254
ENSG00000158122	Q7RTV5	AAED1	AhpC/TSA antioxidant enzyme domain containing 1	1.619	0.696	0.000369276	0.00462942
ENSG00000214226	Q0P5P2	C17orf67	chromosome 17 open reading frame 67	1.62	0.696	0.00028613	0.00378077
ENSG00000165389	Q969W0	SPTSSA	serine palmitoyltransferase small subunit A	1.62	0.696	0.00273622	0.0223783
ENSG00000092010	Q06323	PSME1	proteasome activator subunit 1	1.617	0.694	0.000317023	0.00411063
ENSG00000104611	Q9H788	SH2D4A	SH2 domain containing 4A	1.618	0.694	2.60907e-06	7.44355e-05
ENSG00000114784	O60739	EIF1B	eukaryotic translation initiation factor 1B	1.616	0.693	0.000143366	0.00215755
ENSG00000153832	Q8NEA4	FBXO36	F-box protein 36	1.616	0.692	0.00140117	0.0133738
ENSG00000221926	O95361	TRIM16	tripartite motif containing 16	1.615	0.692	0.00054522	0.00632078
ENSG00000113369	Q96B67	ARRDC3	arrestin domain containing 3	1.614	0.69	0.00132023	0.0127535
ENSG00000057019	Q96PD2	DCBLD2	discoidin, CUB and LCCL domain containing 2	1.614	0.69	1.5082e-05	0.000338012
ENSG00000127948	P16435	POR	P450 (cytochrome) oxidoreductase	1.613	0.689	3.44823e-05	0.00065996
ENSG00000135211	Q9H2L4	TMEM60	transmembrane protein 60	1.612	0.689	2.68285e-05	0.000537552
ENSG00000109220	Q9UKJ5	CHIC2	cysteine rich hydrophobic domain 2	1.611	0.688	9.32372e-05	0.0014951
ENSG00000168216	Q9NUN5	LMBRD1	LMBR1 domain containing 1	1.61	0.687	0.00357439	0.0273813
ENSG00000125772	Q9NPB8	GPCPD1	glycerophosphocholine phosphodiesterase 1	1.608	0.686	0.000982924	0.0101303
ENSG00000109790	Q96PQ7	KLHL5	kelch like family member 5	1.609	0.686	4.99935e-05	0.000897897
ENSG00000128294	O60704	TPST2	tyrosylprotein sulfotransferase 2	1.609	0.686	0.00105727	0.0107264
ENSG00000101255	Q96RU7	TRIB3	tribbles pseudokinase 3	1.609	0.686	0.00308619	0.0245174
ENSG00000120306	Q9H1C7	CYSTM1	cysteine-rich transmembrane module containing 1	1.608	0.685	0.00563837	0.0387659
ENSG00000170310	Q9UNK0	STX8	syntaxin 8	1.604	0.681	0.00287013	0.0232269
ENSG00000158050	Q05923	DUSP2	dual specificity phosphatase 2	1.602	0.68	0.00016344	0.00241079
ENSG00000140598	Q7Z2Z2	EFTUD1	elongation factor Tu GTP binding domain containing 1	1.602	0.68	3.74771e-06	0.000101756
ENSG00000122643	Q9H0P0	NT5C3A	5'-nucleotidase, cytosolic IIIA	1.602	0.68	0.00107635	0.0108617
ENSG00000155287	Q96A46	SLC25A28	solute carrier family 25 (mitochondrial iron transporter), member 28	1.602	0.68	0.00114692	0.0114351
ENSG00000197903	O60814	HIST1H2BK	histone cluster 1, H2bk	1.601	0.679	0.00243906	0.0204547
ENSG00000166394	Q6BCY4	CYB5R2	cytochrome b5 reductase 2	1.6	0.678	0.00308787	0.0245214
ENSG00000117305	P35914	HMGCL	3-hydroxymethyl-3-methylglutaryl-CoA lyase	1.6	0.678	0.00226109	0.0192554
ENSG00000119801	P62699	YPEL5	yippee like 5	1.6	0.678	0.000482221	0.00572772
ENSG00000069399	P20749	BCL3	B-cell CLL/lymphoma 3	1.599	0.677	0.00449557	0.0326007
ENSG00000146425	P63172	DYNLT1	dynein, light chain, Tctex-type 1	1.599	0.677	0.00016512	0.00242526
ENSG00000198551	Q7L945	ZNF627	zinc finger protein 627	1.599	0.677	0.00580471	0.0395047
ENSG00000123609	Q13287	NMI	N-myc and STAT interactor	1.598	0.676	2.69062e-06	7.63431e-05
ENSG00000027075	P24723	PRKCH	protein kinase C, eta	1.598	0.676	0.0004005	0.00491132
ENSG00000166401	P50452	SERPINB8	serpin peptidase inhibitor, clade B (ovalbumin), member 8	1.597	0.676	0.00450201	0.032636
ENSG00000102699	Q9UKK3	PARP4	poly(ADP-ribose) polymerase family member 4	1.596	0.675	1.12818e-05	0.000264234
ENSG00000152684	Q9BRX2	PELO	pelota homolog (Drosophila)	1.596	0.675	0.000633954	0.00711163
ENSG00000104221	Q9HAW0	BRF2	BRF2, RNA polymerase III transcription initiation factor 50 kDa subunit	1.595	0.674	0.004025	0.0299935
ENSG00000145868	Q6PIJ6	FBXO38	F-box protein 38	1.595	0.674	5.32323e-06	0.000138218
ENSG00000139974	Q8IZM9	SLC38A6	solute carrier family 38 member 6	1.596	0.674	0.00640515	0.0423306
ENSG00000185262	Q8IYN6	UBALD2	UBA-like domain containing 2	1.595	0.674	0.00293025	0.0235848
ENSG00000146701	P40926	MDH2	malate dehydrogenase 2	1.594	0.673	0.000421308	0.00510033
ENSG00000115421	Q9BWT3	PAPOLG	poly(A) polymerase gamma	1.593	0.672	0.000103045	0.00163099
ENSG00000100814	Q9NPC3	CCNB1IP1	cyclin B1 interacting protein 1, E3 ubiquitin protein ligase	1.592	0.671	0.000868235	0.00917559
ENSG00000169155	O43298	ZBTB43	zinc finger and BTB domain containing 43	1.592	0.671	4.51e-05	0.000823521
ENSG00000162961	Q9C005	DPY30	dpy-30, histone methyltransferase complex regulatory subunit	1.591	0.67	0.00295365	0.0237273
ENSG00000101132	Q9NQP4	PFDN4	prefoldin subunit 4	1.589	0.668	0.00209777	0.018179
ENSG00000042445	Q6NUM9	RETSAT	retinol saturase (all-trans-retinol 13,14-reductase)	1.589	0.668	0.000177646	0.00256933
ENSG00000180346	Q4W5G0	TIGD2	tigger transposable element derived 2	1.588	0.668	0.00127978	0.0124553
ENSG00000147439	Q9NQY0	BIN3	bridging integrator 3	1.588	0.667	1.76923e-05	0.000385303
ENSG00000168894	Q9P0P0	RNF181	ring finger protein 181	1.588	0.667	0.00227333	0.0193182
ENSG00000067182	P19438	TNFRSF1A	tumor necrosis factor receptor superfamily member 1A	1.588	0.667	0.000172727	0.0025192
ENSG00000121039	Q8IZV5	RDH10	retinol dehydrogenase 10 (all-trans)	1.587	0.666	0.00472982	0.0338277
ENSG00000105708	P17017	ZNF14	zinc finger protein 14	1.587	0.666	0.00029513	0.00386857
ENSG00000147419	Q86WR0	CCDC25	coiled-coil domain containing 25	1.586	0.665	2.39776e-06	6.9166e-05
ENSG00000086289	Q9UM22	EPDR1	ependymin related 1	1.586	0.665	0.00299236	0.023955
ENSG00000125629	Q9Y5U4	INSIG2	insulin induced gene 2	1.586	0.665	0.0019931	0.0174808
ENSG00000140406	Q9H1K6	MESDC1	mesoderm development candidate 1	1.586	0.665	1.68078e-05	0.000369201
ENSG00000196466	Q96GE5	ZNF799	zinc finger protein 799	1.586	0.665	0.00122605	0.0120564
ENSG00000135336	Q9UBD5	ORC3	origin recognition complex subunit 3	1.585	0.664	4.18334e-05	0.000772692
ENSG00000276180	P62805	HIST1H4I	histone cluster 1, H4i	1.584	0.663	0.00463567	0.0333147
ENSG00000079931	Q6UVY6	MOXD1	monooxygenase, DBH-like 1	1.582	0.662	0.00177151	0.0159843
ENSG00000174485	Q7Z401	DENND4A	DENN/MADD domain containing 4A	1.581	0.661	7.46535e-06	0.000185945
ENSG00000109814	O60701	UGDH	UDP-glucose 6-dehydrogenase	1.581	0.661	0.0016815	0.015325
ENSG00000169093	O95671	ASMTL	acetylserotonin O-methyltransferase-like	1.58	0.66	0.000428285	0.00518178
ENSG00000065491	Q9NU19	TBC1D22B	TBC1 domain family member 22B	1.58	0.66	0.000264036	0.00354743
ENSG00000065615	Q7L1T6	CYB5R4	cytochrome b5 reductase 4	1.577	0.658	0.00113883	0.0113818
ENSG00000155368	P07108	DBI	diazepam binding inhibitor (GABA receptor modulator, acyl-CoA binding protein)	1.578	0.658	0.006232	0.0415427
ENSG00000167470	Q504T8	MIDN	midnolin	1.578	0.658	0.0031236	0.0246999
ENSG00000135900	Q9H9J2	MRPL44	mitochondrial ribosomal protein L44	1.578	0.658	0.000137358	0.00207765
ENSG00000085063	P13987	CD59	CD59 molecule, complement regulatory protein	1.577	0.657	0.00180257	0.0162154
ENSG00000130775	Q5TEJ8	THEMIS2	thymocyte selection associated family member 2	1.577	0.657	5.3592e-05	0.000951842
ENSG00000093010	P21964	COMT	catechol-O-methyltransferase	1.576	0.656	0.00136801	0.0131297
ENSG00000164749	Q14541	HNF4G	hepatocyte nuclear factor 4, gamma	1.576	0.656	0.00469494	0.0336244
ENSG00000104756	Q7L273	KCTD9	potassium channel tetramerization domain containing 9	1.575	0.656	0.00282756	0.0230066
ENSG00000042286	Q9BRQ8	AIFM2	apoptosis inducing factor, mitochondria associated 2	1.575	0.655	0.00664593	0.0435757
ENSG00000006652	O00458	IFRD1	interferon-related developmental regulator 1	1.575	0.655	0.000137935	0.00208334
ENSG00000115084	Q8WV83	SLC35F5	solute carrier family 35 member F5	1.574	0.654	0.000160942	0.0023807
ENSG00000104549	Q14534	SQLE	squalene epoxidase	1.573	0.653	0.00227634	0.0193317
ENSG00000083937	Q9UQN3	CHMP2B	charged multivesicular body protein 2B	1.571	0.652	9.1932e-05	0.0014784
ENSG00000243646	Q08334	IL10RB	interleukin 10 receptor subunit beta	1.571	0.652	0.000632068	0.00709431
ENSG00000185187	Q6IA17	SIGIRR	single immunoglobulin and toll-interleukin 1 receptor (TIR) domain	1.572	0.652	0.00303591	0.0241919
ENSG00000105889	Q6NZ63	STEAP1B	STEAP family member 1B	1.571	0.652	0.00123497	0.012127
ENSG00000154065	Q8N6D5	ANKRD29	ankyrin repeat domain 29	1.57	0.651	0.00054817	0.0063338
ENSG00000139168	Q8TBF4	ZCRB1	zinc finger CCHC-type and RNA binding motif 1	1.57	0.651	0.00227292	0.0193182
ENSG00000062716	Q96GC9	VMP1	vacuole membrane protein 1	1.569	0.65	1.27227e-05	0.000291176
ENSG00000242247	Q9NP61	ARFGAP3	ADP ribosylation factor GTPase activating protein 3	1.566	0.647	0.000208751	0.00292561
ENSG00000136147	Q9UIL8	PHF11	PHD finger protein 11	1.565	0.646	2.12148e-05	0.000446585
ENSG00000175895	Q9H8W4	PLEKHF2	pleckstrin homology and FYVE domain containing 2	1.565	0.646	0.000537666	0.00624365
ENSG00000118508	Q13637	RAB32	RAB32, member RAS oncogene family	1.565	0.646	0.00184476	0.0164808
ENSG00000197548	O95352	ATG7	autophagy related 7	1.562	0.644	0.000614402	0.00694853
ENSG00000116663	Q9NRD1	FBXO6	F-box protein 6	1.563	0.644	0.000691863	0.00761342
ENSG00000258102	A6NCE7	MAP1LC3B2	microtubule associated protein 1 light chain 3 beta 2	1.563	0.644	1.78806e-05	0.000387911
ENSG00000100387	P62877	RBX1	ring-box 1, E3 ubiquitin protein ligase	1.562	0.644	0.00465731	0.033424
ENSG00000156735	O95429	BAG4	BCL2 associated athanogene 4	1.561	0.643	0.000610198	0.00691979
ENSG00000255112	Q7LBR1	CHMP1B	charged multivesicular body protein 1B	1.561	0.643	0.000393136	0.00484384
ENSG00000155366	P08134	RHOC	ras homolog family member C	1.562	0.643	0.000866684	0.00916385
ENSG00000188641	Q12882	DPYD	dihydropyrimidine dehydrogenase	1.56	0.641	0.00079407	0.00851292
ENSG00000166012	Q9H5J8	TAF1D	TATA-box binding protein associated factor, RNA polymerase I, D	1.56	0.641	2.0102e-06	5.90511e-05
ENSG00000213047	Q6P3S1	DENND1B	DENN/MADD domain containing 1B	1.558	0.64	0.000108511	0.00169684
ENSG00000111647	A0JNW5	UHRF1BP1L	UHRF1 binding protein 1-like	1.558	0.64	0.00224561	0.0191489
ENSG00000117318	Q02535	ID3	inhibitor of DNA binding 3, dominant negative helix-loop-helix protein	1.557	0.639	0.000937759	0.00974202
ENSG00000174307	Q9Y5J5	PHLDA3	pleckstrin homology-like domain, family A, member 3	1.557	0.639	0.000122412	0.00188168
ENSG00000092871	Q8WZ73	RFFL	ring finger and FYVE-like domain containing E3 ubiquitin protein ligase	1.555	0.637	0.000447263	0.00536458
ENSG00000116668	Q5T5J6	SWT1	SWT1, RNA endoribonuclease homolog	1.555	0.637	0.00292012	0.0235215
ENSG00000175073	Q96JH7	VCPIP1	valosin containing protein (p97)/p47 complex interacting protein 1	1.555	0.637	8.48341e-06	0.000206119
ENSG00000148090	Q13825	AUH	AU RNA binding protein/enoyl-CoA hydratase	1.554	0.636	5.26781e-05	0.000938013
ENSG00000002549	P28838	LAP3	leucine aminopeptidase 3	1.554	0.636	0.0035635	0.0273482
ENSG00000117758	Q86Y82	STX12	syntaxin 12	1.555	0.636	4.1462e-05	0.000767877
ENSG00000164951	Q9P0J1	PDP1	pyruvate dehyrogenase phosphatase catalytic subunit 1	1.553	0.635	1.24678e-06	3.89346e-05
ENSG00000138085	Q6UW56	ATRAID	all-trans retinoic acid induced differentiation factor	1.552	0.634	0.00195707	0.0172544
ENSG00000176171	Q12983	BNIP3	BCL2/adenovirus E1B 19kDa interacting protein 3	1.552	0.634	0.00106145	0.0107531
ENSG00000125734	Q9NPR9	GPR108	G protein-coupled receptor 108	1.552	0.634	0.00139447	0.0133221
ENSG00000015475	P55957	BID	BH3 interacting domain death agonist	1.551	0.633	0.000971975	0.0100423
ENSG00000134802	Q8NBI5	SLC43A3	solute carrier family 43 member 3	1.551	0.633	1.05197e-05	0.000248623
ENSG00000111801	O00478	BTN3A3	butyrophilin subfamily 3 member A3	1.55	0.632	0.000100222	0.00159358
ENSG00000164031	Q8TBM8	DNAJB14	DnaJ heat shock protein family (Hsp40) member B14	1.55	0.632	2.65355e-05	0.000532195
ENSG00000129518	Q56P03	EAPP	E2F-associated phosphoprotein	1.549	0.631	3.33839e-05	0.000645877
ENSG00000118564	Q9UKA1	FBXL5	F-box and leucine-rich repeat protein 5	1.548	0.631	0.000614319	0.00694853
ENSG00000070081		NUCB2	nucleobindin 2	1.548	0.631	2.2001e-05	0.000461826
ENSG00000143622	Q92963	RIT1	Ras-like without CAAX 1	1.548	0.631	0.000144382	0.00216813
ENSG00000105656	P55199	ELL	elongation factor RNA polymerase II	1.548	0.63	9.09699e-05	0.00146552
ENSG00000163162	Q8NC42	RNF149	ring finger protein 149	1.548	0.63	0.000120102	0.00185166
ENSG00000168958	Q9GZY8	MFF	mitochondrial fission factor	1.547	0.629	9.99928e-06	0.000237622
ENSG00000107201	O95786	DDX58	DEAD (Asp-Glu-Ala-Asp) box polypeptide 58	1.545	0.628	2.56065e-06	7.34572e-05
ENSG00000166189	Q86YV9	HPS6	Hermansky-Pudlak syndrome 6	1.545	0.628	0.00180993	0.0162394
ENSG00000165046	Q2VYF4	LETM2	leucine zipper-EF-hand containing transmembrane protein 2	1.546	0.628	0.000357348	0.00450978
ENSG00000168062	Q8N1L9	BATF2	basic leucine zipper transcription factor, ATF-like 2	1.543	0.626	0.000414265	0.0050297
ENSG00000116815	P19256	CD58	CD58 molecule	1.543	0.626	0.00088779	0.00935372
ENSG00000163875	Q9HAF1	MEAF6	MYST/Esa1-associated factor 6	1.543	0.626	8.14662e-06	0.000198977
ENSG00000126804	Q9Y2K1	ZBTB1	zinc finger and BTB domain containing 1	1.544	0.626	0.000434624	0.00524322
ENSG00000100577	O43708	GSTZ1	glutathione S-transferase zeta 1	1.542	0.625	0.00069181	0.00761342
ENSG00000066697	Q96H12	MSANTD3	Myb/SANT-like DNA-binding domain containing 3	1.542	0.625	0.00145044	0.0136994
ENSG00000256683	Q9GZX5	ZNF350	zinc finger protein 350	1.542	0.625	6.64252e-05	0.00113976
ENSG00000205659	Q52LA3	LIN52	lin-52 DREAM MuvB core complex component	1.541	0.624	0.000353386	0.00448154
ENSG00000156831	Q96MF7	NSMCE2	NSE2/MMS21 homolog, SMC5-SMC6 complex SUMO ligase	1.541	0.624	0.00185618	0.0165686
ENSG00000176485	P53816	PLA2G16	phospholipase A2 group XVI	1.541	0.624	0.00588593	0.0399398
ENSG00000145780	Q96JP0	FEM1C	fem-1 homolog c (C. elegans)	1.54	0.623	0.000172126	0.00251395
ENSG00000163754	P46976	GYG1	glycogenin 1	1.541	0.623	0.00230379	0.0195091
ENSG00000184897	Q92522	H1FX	H1 histone family member X	1.54	0.623	0.00339141	0.0262405
ENSG00000087157	Q32NB8	PGS1	phosphatidylglycerophosphate synthase 1	1.54	0.623	0.0017773	0.0160226
ENSG00000126432	P30044	PRDX5	peroxiredoxin 5	1.54	0.623	0.00509319	0.0357865
ENSG00000139323	Q8TC44	POC1B	POC1 centriolar protein B	1.539	0.622	0.0052761	0.0367366
ENSG00000114268	Q16877	PFKFB4	6-phosphofructo-2-kinase/fructose-2,6-biphosphatase 4	1.538	0.621	0.00214335	0.0184586
ENSG00000122008	Q9UBT6	POLK	polymerase (DNA directed) kappa	1.538	0.621	2.79228e-06	7.86909e-05
ENSG00000166471	Q5BJD5	TMEM41B	transmembrane protein 41B	1.538	0.621	6.01813e-06	0.000154603
ENSG00000169252	P07550	ADRB2	adrenoceptor beta 2	1.536	0.619	0.000187835	0.00267575
ENSG00000149485	O60427	FADS1	fatty acid desaturase 1	1.536	0.619	0.00744044	0.047297
ENSG00000127125	Q9HAB8	PPCS	phosphopantothenoylcysteine synthetase	1.536	0.619	0.00586523	0.0398644
ENSG00000115267	Q9BYX4	IFIH1	interferon induced, with helicase C domain 1	1.535	0.618	4.60143e-06	0.000122067
ENSG00000185885	P13164	IFITM1	interferon induced transmembrane protein 1	1.534	0.618	0.000197937	0.00279666
ENSG00000101000	Q9UNN8	PROCR	protein C receptor	1.534	0.617	0.00515207	0.0360587
ENSG00000275052	Q5MIZ7	PPP4R3B	protein phosphatase 4 regulatory subunit 3B	1.532	0.616	6.61335e-06	0.000167737
ENSG00000166173	Q9BRS8	LARP6	La ribonucleoprotein domain family member 6	1.532	0.615	0.000417516	0.00506326
ENSG00000243147	O75394	MRPL33	mitochondrial ribosomal protein L33	1.531	0.615	0.000863983	0.00914924
ENSG00000177556	O00244	ATOX1	antioxidant 1 copper chaperone	1.531	0.614	0.000565425	0.00648991
ENSG00000050820	P56945	BCAR1	breast cancer anti-estrogen resistance 1	1.529	0.613	0.00191409	0.0169618
ENSG00000139112	Q9H0R8	GABARAPL1	GABA(A) receptor-associated protein like 1	1.528	0.612	0.00208348	0.0180777
ENSG00000074842	Q969H8	MYDGF	myeloid-derived growth factor	1.529	0.612	0.00187107	0.0166729
ENSG00000160055	Q8WY98	TMEM234	transmembrane protein 234	1.529	0.612	0.00172432	0.0156468
ENSG00000059769	Q9H1X3	DNAJC25	DnaJ heat shock protein family (Hsp40) member C25	1.526	0.61	0.00137986	0.0132189
ENSG00000114742	Q8TAF3	WDR48	WD repeat domain 48	1.527	0.61	6.62559e-06	0.000167843
ENSG00000164603	Q1RMZ1	C7orf60	chromosome 7 open reading frame 60	1.525	0.608	0.00137757	0.0132031
ENSG00000119878	Q9P021	CRIPT	cysteine-rich PDZ-binding protein	1.524	0.608	0.000856404	0.00908286
ENSG00000010278	P21926	CD9	CD9 molecule	1.523	0.607	0.000763312	0.00823838
ENSG00000091039	Q9BZF1	OSBPL8	oxysterol binding protein like 8	1.524	0.607	2.29662e-06	6.64676e-05
ENSG00000108179	P30405	PPIF	peptidylprolyl isomerase F	1.523	0.607	0.00781128	0.0488158
ENSG00000169764	Q16851	UGP2	UDP-glucose pyrophosphorylase 2	1.523	0.607	2.7755e-05	0.00055292
ENSG00000139410	Q96GA7	SDSL	serine dehydratase-like	1.523	0.606	0.00397233	0.0297129
ENSG00000177058	Q8NBW4	SLC38A9	solute carrier family 38 member 9	1.522	0.606	0.000671154	0.00742555
ENSG00000118526	O43680	TCF21	transcription factor 21	1.522	0.606	0.000151251	0.00225661
ENSG00000126368	P20393	NR1D1	nuclear receptor subfamily 1 group D member 1	1.521	0.605	0.00145596	0.0137391
ENSG00000213699	Q8N357	SLC35F6	solute carrier family 35 member F6	1.521	0.605	0.000192502	0.002731
ENSG00000174010	Q96M94	KLHL15	kelch like family member 15	1.52	0.604	0.000501892	0.00591743
ENSG00000204977	O60858	TRIM13	tripartite motif containing 13	1.52	0.604	0.00595052	0.0402337
ENSG00000132471	Q969T9	WBP2	WW domain binding protein 2	1.52	0.604	0.00433306	0.0316874
ENSG00000132196	P56937	HSD17B7	hydroxysteroid (17-beta) dehydrogenase 7	1.519	0.603	0.00177826	0.0160244
ENSG00000143801	P49810	PSEN2	presenilin 2	1.519	0.603	0.000603243	0.00685213
ENSG00000121486	Q7Z2T5	TRMT1L	tRNA methyltransferase 1 like	1.519	0.603	0.000115912	0.00179504
ENSG00000183621	Q7Z4V0	ZNF438	zinc finger protein 438	1.519	0.603	0.00614792	0.0411404
ENSG00000132002	P25685	DNAJB1	DnaJ heat shock protein family (Hsp40) member B1	1.518	0.602	0.000379184	0.00471143
ENSG00000178177	Q8N3X6	LCORL	ligand dependent nuclear receptor corepressor like	1.517	0.602	0.0015872	0.0146157
ENSG00000106993	Q7L3B6	CDC37L1	cell division cycle 37-like 1	1.516	0.601	0.00154728	0.0143406
ENSG00000013374		NUB1	negative regulator of ubiquitin-like proteins 1	1.516	0.6	7.07945e-05	0.00119125
ENSG00000171103	Q9BVS5	TRMT61B	tRNA methyltransferase 61B	1.515	0.6	0.00178813	0.0161064
ENSG00000166595	Q9Y3D0	FAM96B	family with sequence similarity 96 member B	1.511	0.595	0.00364203	0.0277055
ENSG00000111684	Q6P1A2	LPCAT3	lysophosphatidylcholine acyltransferase 3	1.511	0.595	0.000223266	0.00309566
ENSG00000139370	Q8N697	SLC15A4	solute carrier family 15 (oligopeptide transporter), member 4	1.511	0.595	0.00075978	0.00820452
ENSG00000058799	Q9Y548	YIPF1	Yip1 domain family member 1	1.51	0.595	0.000288885	0.00380673
ENSG00000086062	P15291	B4GALT1	UDP-Gal:betaGlcNAc beta 1,4- galactosyltransferase, polypeptide 1	1.509	0.594	0.000163727	0.00241161
ENSG00000150054	Q5T2T1	MPP7	membrane protein, palmitoylated 7	1.509	0.594	0.00644984	0.0425718
ENSG00000165502	Q969Q0	RPL36AL	ribosomal protein L36a like	1.509	0.594	0.00207033	0.0180087
ENSG00000128311	Q16762	TST	thiosulfate sulfurtransferase (rhodanese)	1.51	0.594	0.00673656	0.0440588
ENSG00000117151	Q01459	CTBS	chitobiase, di-N-acetyl-	1.509	0.593	0.00169279	0.0154144
ENSG00000106733	Q9NWW6	NMRK1	nicotinamide riboside kinase 1	1.508	0.593	0.00539704	0.0374159
ENSG00000109332	P61077	UBE2D3	ubiquitin conjugating enzyme E2D 3	1.509	0.593	0.00149455	0.0140016
ENSG00000257365	P49356	FNTB	farnesyltransferase, CAAX box, beta	1.507	0.592	0.00098122	0.0101177
ENSG00000265808	O75396	SEC22B	SEC22 homolog B, vesicle trafficking protein (gene/pseudogene)	1.507	0.592	9.98589e-05	0.00159025
ENSG00000196646	P52737	ZNF136	zinc finger protein 136	1.507	0.592	0.000404723	0.00495344
ENSG00000169519	A6NJ78	METTL15	methyltransferase like 15	1.506	0.59	0.00335238	0.0260063
ENSG00000102531	Q9Y2H6	FNDC3A	fibronectin type III domain containing 3A	1.504	0.589	8.57832e-05	0.00139493
ENSG00000134294	Q96QD8	SLC38A2	solute carrier family 38 member 2	1.503	0.588	0.000340774	0.00435078
ENSG00000119537	Q06136	KDSR	3-ketodihydrosphingosine reductase	1.501	0.586	0.00165378	0.0151189
ENSG00000174206	Q96MD2	C12orf66	chromosome 12 open reading frame 66	1.5	0.585	0.0014476	0.0136851
ENSG00000168090	Q7L5N1	COPS6	COP9 signalosome subunit 6	1.5	0.585	0.00198678	0.0174572
ENSG00000128513	Q9NUX5	POT1	protection of telomeres 1	1.5	0.585	3.53039e-05	0.000671073
ENSG00000180773	Q6YBV0	SLC36A4	solute carrier family 36 (proton/amino acid symporter), member 4	1.5	0.585	0.00115314	0.0114806
ENSG00000082146	Q9C0K7	STRADB	STE20-related kinase adaptor beta	1.498	0.583	0.00422257	0.0310981
ENSG00000104343	Q96B02	UBE2W	ubiquitin conjugating enzyme E2W (putative)	1.498	0.583	0.000177225	0.00256568
ENSG00000164713	O95415	BRI3	brain protein I3	1.496	0.581	0.00354279	0.0272102
ENSG00000112245	Q93096	PTP4A1	protein tyrosine phosphatase type IVA, member 1	1.496	0.581	0.000796258	0.00853198
ENSG00000173214	Q5TF39	KIAA1919	KIAA1919	1.494	0.58	0.0056293	0.0387419
ENSG00000005801	O14628	ZNF195	zinc finger protein 195	1.495	0.58	0.00412237	0.0305549
ENSG00000167863	O75947	ATP5H	ATP synthase, H+ transporting, mitochondrial Fo complex subunit D	1.492	0.577	0.00314469	0.0247834
ENSG00000160691	P29353	SHC1	SHC (Src homology 2 domain containing) transforming protein 1	1.491	0.576	4.85529e-05	0.00087809
ENSG00000131725	Q5JSH3	WDR44	WD repeat domain 44	1.49	0.576	0.00104403	0.0106545
ENSG00000166167	Q9Y297	BTRC	beta-transducin repeat containing E3 ubiquitin protein ligase	1.489	0.575	0.000111404	0.00173687
ENSG00000118523	P29279	CTGF	connective tissue growth factor	1.49	0.575	0.00376231	0.0284437
ENSG00000100612	Q9Y394	DHRS7	dehydrogenase/reductase (SDR family) member 7	1.49	0.575	0.000218567	0.00304267
ENSG00000140941	Q9GZQ8	MAP1LC3B	microtubule associated protein 1 light chain 3 beta	1.49	0.575	0.000247368	0.00335382
ENSG00000112357	O00628	PEX7	peroxisomal biogenesis factor 7	1.486	0.572	0.00782969	0.0489015
ENSG00000169087	Q96EW2	HSPBAP1	HSPB (heat shock 27kDa) associated protein 1	1.485	0.571	0.00425547	0.031285
ENSG00000107798	P38571	LIPA	lipase A, lysosomal acid, cholesterol esterase	1.486	0.571	0.000411365	0.00501793
ENSG00000185808	P57054	PIGP	phosphatidylinositol glycan anchor biosynthesis class P	1.486	0.571	0.00219585	0.0188095
ENSG00000152558	Q8N131	TMEM123	transmembrane protein 123	1.486	0.571	0.000437315	0.00526652
ENSG00000136732	P04921	GYPC	glycophorin C (Gerbich blood group)	1.484	0.57	0.00490519	0.0347947
ENSG00000110057	Q9H1C4	UNC93B1	unc-93 homolog B1 (C. elegans)	1.485	0.57	0.000655922	0.00729902
ENSG00000131100	P36543	ATP6V1E1	ATPase, H+ transporting, lysosomal 31kDa, V1 subunit E1	1.483	0.569	0.00229286	0.0194481
ENSG00000144744	Q8TBC4	UBA3	ubiquitin-like modifier activating enzyme 3	1.482	0.568	0.0015676	0.014503
ENSG00000085449	Q8IWB7	WDFY1	WD repeat and FYVE domain containing 1	1.482	0.568	0.00288338	0.0232978
ENSG00000111711	Q9Y3E0	GOLT1B	golgi transport 1B	1.481	0.567	0.00752584	0.0475771
ENSG00000156587	O14933	UBE2L6	ubiquitin conjugating enzyme E2L 6	1.482	0.567	0.00249225	0.0207834
ENSG00000135049	Q9UPW5	AGTPBP1	ATP/GTP binding protein 1	1.48	0.566	0.000193798	0.00274378
ENSG00000104047	Q8N5C7	DTWD1	DTW domain containing 1	1.479	0.565	1.19335e-05	0.000276691
ENSG00000108602	P30838	ALDH3A1	aldehyde dehydrogenase 3 family member A1	1.477	0.563	0.00705743	0.045645
ENSG00000166250	Q9H6B4	CLMP	CXADR-like membrane protein	1.477	0.563	0.00417321	0.030858
ENSG00000159176	P21291	CSRP1	cysteine and glycine rich protein 1	1.477	0.562	7.25907e-05	0.00121559
ENSG00000171135	Q8N5M9	JAGN1	jagunal homolog 1	1.476	0.562	0.00231165	0.0195438
ENSG00000137500	Q9GZT6	CCDC90B	coiled-coil domain containing 90B	1.475	0.561	0.00350335	0.0269363
ENSG00000100532	Q99675	CGRRF1	cell growth regulator with ring finger domain 1	1.476	0.561	0.00544641	0.0377048
ENSG00000088832	P62942	FKBP1A	FK506 binding protein 1A	1.473	0.559	0.00649656	0.0427851
ENSG00000117000	Q13129	RLF	rearranged L-myc fusion	1.473	0.558	0.000992624	0.0102049
ENSG00000128039	Q9H8P0	SRD5A3	steroid 5 alpha-reductase 3	1.47	0.555	0.00807117	0.0499893
ENSG00000145919	Q96IK1	BOD1	biorientation of chromosomes in cell division 1	1.468	0.553	0.000268389	0.00359662
ENSG00000203722	Q6H3X3	RAET1G	retinoic acid early transcript 1G	1.464	0.55	0.00724882	0.0463594
ENSG00000117475	Q9H2G9	BLZF1	basic leucine zipper nuclear factor 1	1.462	0.548	0.00513523	0.0360211
ENSG00000038274	Q9NZL9	MAT2B	methionine adenosyltransferase II, beta	1.463	0.548	0.000127872	0.0019512
ENSG00000006451	P11233	RALA	v-ral simian leukemia viral oncogene homolog A (ras related)	1.463	0.548	0.00154375	0.0143143
ENSG00000170185	Q8NB14	USP38	ubiquitin specific peptidase 38	1.462	0.548	0.000931788	0.00970358
ENSG00000136247	Q9NPG8	ZDHHC4	zinc finger, DHHC-type containing 4	1.462	0.548	0.00257602	0.021345
ENSG00000076513	Q8IZ07	ANKRD13A	ankyrin repeat domain 13A	1.461	0.547	0.000515657	0.00604204
ENSG00000166171	Q9BVM2	DPCD	deleted in primary ciliary dyskinesia homolog (mouse)	1.46	0.546	0.00528275	0.0367706
ENSG00000112851	Q96RT1	ERBB2IP	erbb2 interacting protein	1.46	0.546	1.88578e-05	0.000406009
ENSG00000168288	Q9H3L0	MMADHC	methylmalonic aciduria (cobalamin deficiency) cblD type, with homocystinuria	1.46	0.546	0.00736631	0.0469377
ENSG00000112773	Q96IP4	FAM46A	family with sequence similarity 46 member A	1.459	0.545	0.00103064	0.0105333
ENSG00000196505	Q9NXN4	GDAP2	ganglioside induced differentiation associated protein 2	1.459	0.545	0.000331898	0.00425837
ENSG00000074319	Q99816	TSG101	tumor susceptibility 101	1.459	0.545	0.000322173	0.00415925
ENSG00000134352	P40189	IL6ST	interleukin 6 signal transducer	1.458	0.544	0.000169985	0.00248968
ENSG00000100300	P30536	TSPO	translocator protein	1.458	0.544	0.00625675	0.0416392
ENSG00000156172	Q96NL8	C8orf37	chromosome 8 open reading frame 37	1.457	0.543	0.00171549	0.0155871
ENSG00000114956	Q16854	DGUOK	deoxyguanosine kinase	1.456	0.542	0.00162388	0.0149083
ENSG00000088448	Q9NXR5	ANKRD10	ankyrin repeat domain 10	1.455	0.541	0.000792367	0.00849904
ENSG00000128335	Q9BQE5	APOL2	apolipoprotein L2	1.455	0.541	6.883e-05	0.00116764
ENSG00000168818	Q9P2W9	STX18	syntaxin 18	1.455	0.541	0.000955137	0.00989783
ENSG00000178449	Q96I36	COX14	COX14, cytochrome c oxidase assembly factor	1.454	0.54	0.0070063	0.0454283
ENSG00000131446	P26572	MGAT1	mannosyl (alpha-1,3-)-glycoprotein beta-1,2-N-acetylglucosaminyltransferase	1.454	0.54	0.000390026	0.00481696
ENSG00000184117	Q9BPW8	NIPSNAP1	nipsnap homolog 1 (C. elegans)	1.454	0.54	0.00472718	0.0338204
ENSG00000125733	Q15642	TRIP10	thyroid hormone receptor interactor 10	1.453	0.539	0.000539157	0.00625747
ENSG00000188554	Q14596	NBR1	neighbor of BRCA1 gene 1	1.452	0.538	0.00636694	0.0421584
ENSG00000179933	Q9NWQ9	C14orf119	chromosome 14 open reading frame 119	1.451	0.537	0.00242476	0.0203594
ENSG00000134882	Q8NBM4	UBAC2	UBA domain containing 2	1.451	0.537	0.000150611	0.00225029
ENSG00000173744	P52594	AGFG1	ArfGAP with FG repeats 1	1.45	0.536	0.0062898	0.0417872
ENSG00000162972	Q8WWC4	C2orf47	chromosome 2 open reading frame 47	1.45	0.536	0.00708136	0.045696
ENSG00000124688	Q15013	MAD2L1BP	MAD2L1 binding protein	1.45	0.536	0.00758619	0.0478549
ENSG00000169084	Q8N5I4	DHRSX	dehydrogenase/reductase (SDR family) X-linked	1.449	0.535	0.00346216	0.0267085
ENSG00000136169	Q96T68	SETDB2	SET domain, bifurcated 2	1.449	0.535	0.0054305	0.0376102
ENSG00000170340	Q9NY97	B3GNT2	UDP-GlcNAc:betaGal beta-1,3-N-acetylglucosaminyltransferase 2	1.448	0.534	0.00285361	0.0231472
ENSG00000189067	Q99732	LITAF	lipopolysaccharide-induced TNF factor	1.448	0.534	0.00442672	0.0322025
ENSG00000175198	P05165	PCCA	propionyl-CoA carboxylase alpha subunit	1.447	0.534	0.00104388	0.0106545
ENSG00000162927	Q3MIT2	PUS10	pseudouridylate synthase 10	1.448	0.534	0.00103186	0.0105406
ENSG00000183735	Q9UHD2	TBK1	TANK-binding kinase 1	1.448	0.534	0.000463947	0.00552644
ENSG00000165609	Q9UKK9	NUDT5	nudix hydrolase 5	1.447	0.533	0.00013752	0.00207859
ENSG00000132912	Q9UJW0	DCTN4	dynactin subunit 4	1.446	0.532	0.0016243	0.0149083
ENSG00000196839	P00813	ADA	adenosine deaminase	1.445	0.531	0.00098872	0.0101749
ENSG00000112343	O00635	TRIM38	tripartite motif containing 38	1.445	0.531	0.00239644	0.0201786
ENSG00000177888	Q5SVQ8	ZBTB41	zinc finger and BTB domain containing 41	1.444	0.53	0.00451649	0.0326997
ENSG00000205683	Q92784	DPF3	D4, zinc and double PHD fingers, family 3	1.442	0.529	0.000858527	0.00910073
ENSG00000130164	P01130	LDLR	low density lipoprotein receptor	1.443	0.529	0.000721519	0.00787724
ENSG00000115204	P39210	MPV17	MpV17 mitochondrial inner membrane protein	1.441	0.527	0.00104531	0.0106583
ENSG00000183255	P53801	PTTG1IP	pituitary tumor-transforming 1 interacting protein	1.441	0.527	0.000625447	0.00703899
ENSG00000101846	P08842	STS	steroid sulfatase (microsomal), isozyme S	1.441	0.527	0.00266883	0.0219653
ENSG00000143013	P61968	LMO4	LIM domain only 4	1.44	0.526	0.00588128	0.0399398
ENSG00000164180	Q8NDZ6	TMEM161B	transmembrane protein 161B	1.44	0.526	0.00201261	0.0176097
ENSG00000164346	O95478	NSA2	NSA2, ribosome biogenesis homolog	1.439	0.525	0.00362637	0.0276369
ENSG00000143457	Q9H4A5	GOLPH3L	golgi phosphoprotein 3-like	1.438	0.524	0.00344085	0.0265675
ENSG00000069974	P51159	RAB27A	RAB27A, member RAS oncogene family	1.438	0.524	0.00242143	0.0203479
ENSG00000072401	P51668	UBE2D1	ubiquitin conjugating enzyme E2D 1	1.438	0.524	0.000897098	0.0094184
ENSG00000122042	O95164	UBL3	ubiquitin like 3	1.438	0.524	0.00164914	0.015083
ENSG00000130202	Q92692	PVRL2	poliovirus receptor-related 2 (herpesvirus entry mediator B)	1.437	0.523	0.000744987	0.0080661
ENSG00000109929	O75845	SC5D	sterol-C5-desaturase	1.437	0.523	0.00514755	0.0360587
ENSG00000035687	P30520	ADSS	adenylosuccinate synthase	1.436	0.522	0.00390783	0.0293518
ENSG00000120805	P40616	ARL1	ADP ribosylation factor like GTPase 1	1.436	0.522	0.00137706	0.0132031
ENSG00000162889	P49137	MAPKAPK2	mitogen-activated protein kinase-activated protein kinase 2	1.435	0.521	1.95716e-05	0.000417487
ENSG00000145388	Q9HCE5	METTL14	methyltransferase like 14	1.435	0.521	0.000593711	0.00676602
ENSG00000184203	P41236	PPP1R2	protein phosphatase 1 regulatory inhibitor subunit 2	1.435	0.521	0.00556202	0.0383297
ENSG00000090989	Q9NV70	EXOC1	exocyst complex component 1	1.434	0.52	0.00143051	0.0135605
ENSG00000157191	Q9NVZ3	NECAP2	NECAP endocytosis associated 2	1.433	0.52	0.001391	0.0133134
ENSG00000109083	Q8IY31	IFT20	intraflagellar transport 20	1.433	0.519	0.00428623	0.0314555
ENSG00000162735	P40855	PEX19	peroxisomal biogenesis factor 19	1.433	0.519	0.000314245	0.0040848
ENSG00000168610	P40763	STAT3	signal transducer and activator of transcription 3 (acute-phase response factor)	1.433	0.519	0.000994657	0.0102167
ENSG00000183726	O95807	TMEM50A	transmembrane protein 50A	1.433	0.519	0.00284229	0.0230644
ENSG00000164258	O43181	NDUFS4	NADH:ubiquinone oxidoreductase subunit S4	1.431	0.517	0.00752861	0.0475771
ENSG00000143545	P51153	RAB13	RAB13, member RAS oncogene family	1.431	0.517	0.00323346	0.0253676
ENSG00000183283	Q15038	DAZAP2	DAZ associated protein 2	1.43	0.516	0.0012416	0.0121748
ENSG00000120725	Q9H173	SIL1	SIL1 nucleotide exchange factor	1.428	0.514	0.000703376	0.00770343
ENSG00000158710	P37802	TAGLN2	transgelin 2	1.428	0.514	0.00677609	0.0442477
ENSG00000057663	Q9H1Y0	ATG5	autophagy related 5	1.427	0.513	0.00420678	0.0310038
ENSG00000114446	Q9NWB7	IFT57	intraflagellar transport 57	1.427	0.513	0.0074409	0.047297
ENSG00000178381	Q8N6M9	ZFAND2A	zinc finger, AN1-type domain 2A	1.427	0.513	0.00505064	0.0355918
ENSG00000103381	Q9BRF8	CPPED1	calcineurin-like phosphoesterase domain containing 1	1.425	0.511	5.71833e-05	0.00100363
ENSG00000152904	O95749	GGPS1	geranylgeranyl diphosphate synthase 1	1.425	0.511	0.000900927	0.00943954
ENSG00000160213	P04080	CSTB	cystatin B	1.424	0.51	0.000282727	0.0037477
ENSG00000132376	Q9BT40	INPP5K	inositol polyphosphate-5-phosphatase K	1.424	0.51	0.00442198	0.0321792
ENSG00000180628	Q86SE9	PCGF5	polycomb group ring finger 5	1.424	0.51	0.00167067	0.0152532
ENSG00000162928	Q92968	PEX13	peroxisomal biogenesis factor 13	1.424	0.51	0.000351656	0.0044705
ENSG00000130021	Q08623	PUDP	pseudouridine 5'-phosphatase	1.424	0.51	0.00707216	0.0456705
ENSG00000100504	P06737	PYGL	phosphorylase, glycogen, liver	1.424	0.51	0.00362095	0.0276159
ENSG00000006015	Q96EN9	C19orf60	chromosome 19 open reading frame 60	1.423	0.509	0.0050301	0.0355112
ENSG00000068912	Q96DZ1	ERLEC1	endoplasmic reticulum lectin 1	1.423	0.509	0.00121127	0.0119376
ENSG00000221963	Q9BWW8	APOL6	apolipoprotein L6	1.422	0.508	0.00397235	0.0297129
ENSG00000109079	Q13829	TNFAIP1	TNF alpha induced protein 1	1.422	0.508	0.000295192	0.00386857
ENSG00000198087	Q9Y5K6	CD2AP	CD2-associated protein	1.419	0.505	0.00432893	0.0316795
ENSG00000120697	Q9Y673	ALG5	ALG5, dolichyl-phosphate beta-glucosyltransferase	1.418	0.504	0.00598111	0.040388
ENSG00000168785	P62079	TSPAN5	tetraspanin 5	1.418	0.504	0.00506903	0.035665
ENSG00000123268	P18846	ATF1	activating transcription factor 1	1.417	0.503	0.00145662	0.0137391
ENSG00000089876	Q7L7V1	DHX32	DEAH (Asp-Glu-Ala-His) box polypeptide 32	1.417	0.503	0.00605297	0.0406883
ENSG00000170903	Q8NCY6	MSANTD4	Myb/SANT-like DNA-binding domain containing 4 with coiled-coils	1.417	0.503	0.000820192	0.00876585
ENSG00000260027	P09629	HOXB7	homeobox B7	1.416	0.501	0.00288473	0.0232997
ENSG00000095574	Q9H5V7	IKZF5	IKAROS family zinc finger 5	1.415	0.501	0.000439588	0.00528777
ENSG00000143498	Q15573	TAF1A	TATA-box binding protein associated factor, RNA polymerase I, A	1.415	0.501	0.00751711	0.0475634
ENSG00000155868	O43513	MED7	mediator complex subunit 7	1.413	0.499	0.0043941	0.0320212
ENSG00000159111	Q7Z7H8	MRPL10	mitochondrial ribosomal protein L10	1.414	0.499	0.00237271	0.0200112
ENSG00000136141	Q9Y2L9	LRCH1	leucine-rich repeats and calponin homology (CH) domain containing 1	1.412	0.498	0.00552683	0.0380998
ENSG00000158411	Q8WV92	MITD1	microtubule interacting and trafficking domain containing 1	1.412	0.498	0.00418816	0.0309103
ENSG00000175105	Q8IZM8	ZNF654	zinc finger protein 654	1.412	0.498	0.00213439	0.0184043
ENSG00000175602	Q15834	CCDC85B	coiled-coil domain containing 85B	1.412	0.497	0.00359869	0.0274764
ENSG00000135185	Q9BU79	TMEM243	transmembrane protein 243	1.41	0.496	0.00630293	0.0418479
ENSG00000123992	Q9ULA0	DNPEP	aspartyl aminopeptidase	1.41	0.495	0.00244821	0.0205149
ENSG00000151694	P78536	ADAM17	ADAM metallopeptidase domain 17	1.408	0.494	0.000166155	0.00243702
ENSG00000185716	Q8NHV5	C16orf52	chromosome 16 open reading frame 52	1.409	0.494	9.99545e-05	0.00159055
ENSG00000160209	O00764	PDXK	pyridoxal (pyridoxine, vitamin B6) kinase	1.409	0.494	0.00141974	0.0134936
ENSG00000136560	Q92844	TANK	TRAF family member associated NFKB activator	1.408	0.494	0.00395602	0.0296281
ENSG00000138463	Q96SL1	DIRC2	disrupted in renal carcinoma 2	1.408	0.493	0.00454971	0.0328673
ENSG00000138029	P55084	HADHB	hydroxyacyl-CoA dehydrogenase/3-ketoacyl-CoA thiolase/enoyl-CoA hydratase (trifunctional protein), beta subunit	1.406	0.492	0.00088756	0.00935372
ENSG00000163110	Q96HC4	PDLIM5	PDZ and LIM domain 5	1.407	0.492	0.00270423	0.0221777
ENSG00000125037	Q9P0I2	EMC3	ER membrane protein complex subunit 3	1.406	0.491	0.0029894	0.0239405
ENSG00000101782	O14730	RIOK3	RIO kinase 3	1.405	0.491	0.000194703	0.00275471
ENSG00000104231	Q8TCF1	ZFAND1	zinc finger, AN1-type domain 1	1.406	0.491	0.00329569	0.0257296
ENSG00000086666	Q6FIF0	ZFAND6	zinc finger, AN1-type domain 6	1.405	0.491	0.00223662	0.0191036
ENSG00000156973	O43924	PDE6D	phosphodiesterase 6D	1.404	0.49	0.00399436	0.0298293
ENSG00000149308	Q14207	NPAT	nuclear protein, ataxia-telangiectasia locus	1.404	0.489	0.00212218	0.0183218
ENSG00000144048	O75319	DUSP11	dual specificity phosphatase 11	1.403	0.488	0.00359398	0.0274605
ENSG00000157107	Q0JRZ9	FCHO2	FCH domain only 2	1.402	0.487	0.00296013	0.0237518
ENSG00000152492	Q8IVM0	CCDC50	coiled-coil domain containing 50	1.399	0.484	0.000143563	0.00215895
ENSG00000152137	Q9UJY1	HSPB8	heat shock protein family B (small) member 8	1.399	0.484	0.00129506	0.0125687
ENSG00000145817	Q969M3	YIPF5	Yip1 domain family member 5	1.399	0.484	0.00695414	0.0451976
ENSG00000101457	Q9H147	DNTTIP1	deoxynucleotidyltransferase, terminal, interacting protein 1	1.398	0.483	0.00657863	0.0432668
ENSG00000112200	Q9Y4E5	ZNF451	zinc finger protein 451	1.398	0.483	0.00125011	0.0122352
ENSG00000099968	Q9BXK5	BCL2L13	BCL2-like 13 (apoptosis facilitator)	1.397	0.482	0.00196971	0.0173511
ENSG00000153132	O14967	CLGN	calmegin	1.396	0.481	0.0042878	0.0314559
ENSG00000122591	Q9BYI3	FAM126A	family with sequence similarity 126 member A	1.395	0.481	0.00206721	0.0179966
ENSG00000141741	Q9BRT3	MIEN1	migration and invasion enhancer 1	1.395	0.48	0.00317466	0.0250006
ENSG00000144597	Q96JC9	EAF1	ELL associated factor 1	1.394	0.479	0.00130044	0.0125974
ENSG00000085382	Q8IYU2	HACE1	HECT domain and ankyrin repeat containing E3 ubiquitin protein ligase 1	1.394	0.479	0.00799852	0.0496821
ENSG00000171302	Q8WVQ1	CANT1	calcium activated nucleotidase 1	1.393	0.478	0.000289826	0.00381506
ENSG00000136877	Q05932	FPGS	folylpolyglutamate synthase	1.392	0.477	0.00335578	0.0260196
ENSG00000113742	Q17RY0	CPEB4	cytoplasmic polyadenylation element binding protein 4	1.391	0.476	0.00485178	0.0344864
ENSG00000181104	P25116	F2R	coagulation factor II (thrombin) receptor	1.39	0.476	0.00776067	0.0486164
ENSG00000145860	Q96MT1	RNF145	ring finger protein 145	1.391	0.476	0.00577131	0.0393676
ENSG00000054598	Q12948	FOXC1	forkhead box C1	1.39	0.475	0.00218191	0.0187208
ENSG00000266412	Q13772	NCOA4	nuclear receptor coactivator 4	1.39	0.475	0.00765995	0.0481886
ENSG00000132718	Q9BT88	SYT11	synaptotagmin 11	1.39	0.475	0.0028008	0.0228316
ENSG00000110330	Q13490	BIRC2	baculoviral IAP repeat containing 2	1.388	0.473	0.0012725	0.0124018
ENSG00000163659	Q7Z3E1	TIPARP	TCDD-inducible poly(ADP-ribose) polymerase	1.388	0.473	0.00476715	0.0340244
ENSG00000160908	Q53GI3	ZNF394	zinc finger protein 394	1.386	0.471	0.00497735	0.0352105
ENSG00000115446	Q53HI1	UNC50	unc-50 homolog (C. elegans)	1.384	0.469	0.0030212	0.0241394
ENSG00000087095	Q9UBE8	NLK	nemo-like kinase	1.383	0.468	0.0071907	0.0461581
ENSG00000133121	Q9Y3M8	STARD13	StAR related lipid transfer domain containing 13	1.383	0.468	0.00282859	0.0230066
ENSG00000068079	P80217	IFI35	interferon induced protein 35	1.381	0.466	0.00445308	0.032349
ENSG00000163683	Q96QK8	SMIM14	small integral membrane protein 14	1.381	0.466	0.00613854	0.0410909
ENSG00000175573	Q9H3H3	C11orf68	chromosome 11 open reading frame 68	1.379	0.464	0.0066253	0.0434815
ENSG00000196975	P09525	ANXA4	annexin A4	1.378	0.462	0.00359105	0.0274482
ENSG00000135317	Q9Y5W7	SNX14	sorting nexin 14	1.377	0.462	0.00269241	0.0221244
ENSG00000120690	P32519	ELF1	E74-like factor 1 (ets domain transcription factor)	1.376	0.461	0.00167012	0.0152532
ENSG00000145390	Q70EK8	USP53	ubiquitin specific peptidase 53	1.376	0.46	0.00750113	0.0474912
ENSG00000157954	Q9Y4P8	WIPI2	WD repeat domain, phosphoinositide interacting 2	1.374	0.459	0.000491559	0.00581208
ENSG00000165006	Q9NZ09	UBAP1	ubiquitin associated protein 1	1.374	0.458	0.000732643	0.00796108
ENSG00000178996	Q96RF0	SNX18	sorting nexin 18	1.371	0.456	0.0023557	0.019892
ENSG00000083223	Q5VYS8	ZCCHC6	zinc finger, CCHC domain containing 6	1.372	0.456	0.00763526	0.0480811
ENSG00000198746	Q96I76	GPATCH3	G-patch domain containing 3	1.37	0.455	0.00695101	0.0451913
ENSG00000145996	Q5VV42	CDKAL1	CDK5 regulatory subunit associated protein 1-like 1	1.369	0.454	0.00440346	0.0320782
ENSG00000151065	Q8IZD4	DCP1B	decapping mRNA 1B	1.37	0.454	0.00694714	0.0451803
ENSG00000143324	Q9UBH6	XPR1	xenotropic and polytropic retrovirus receptor 1	1.37	0.454	0.00778557	0.0487137
ENSG00000197329	Q96FA3	PELI1	pellino E3 ubiquitin protein ligase 1	1.369	0.453	0.00635831	0.0421392
ENSG00000168003	P08195	SLC3A2	solute carrier family 3 (amino acid transporter heavy chain), member 2	1.368	0.452	0.0049142	0.0348349
ENSG00000026025	P08670	VIM	vimentin	1.368	0.452	0.00536909	0.0372345
ENSG00000163577	Q9GZV4	EIF5A2	eukaryotic translation initiation factor 5A2	1.366	0.45	0.00434649	0.0317575
ENSG00000125818	Q92530	PSMF1	proteasome inhibitor subunit 1	1.366	0.45	0.000283526	0.00375352
ENSG00000101343	Q9BZJ0	CRNKL1	crooked neck pre-mRNA splicing factor 1	1.365	0.449	0.00607879	0.0408223
ENSG00000107372	O76080	ZFAND5	zinc finger, AN1-type domain 5	1.365	0.449	0.00689023	0.0448803
ENSG00000100439	Q8TB40	ABHD4	abhydrolase domain containing 4	1.363	0.447	0.00283692	0.0230346
ENSG00000172270	P35613	BSG	basigin (Ok blood group)	1.363	0.447	0.00478918	0.0341465
ENSG00000078142	Q8NEB9	PIK3C3	phosphatidylinositol 3-kinase catalytic subunit type 3	1.364	0.447	0.00241504	0.0203188
ENSG00000115520	Q9H8M1	COQ10B	coenzyme Q10B	1.361	0.445	0.00362323	0.0276231
ENSG00000136436	Q13137	CALCOCO2	calcium binding and coiled-coil domain 2	1.361	0.444	0.000736149	0.00799501
ENSG00000089327	Q96DB9	FXYD5	FXYD domain containing ion transport regulator 5	1.36	0.444	0.00139346	0.0133185
ENSG00000004961	P53701	HCCS	holocytochrome c synthase	1.36	0.443	0.00475832	0.0339847
ENSG00000185728	Q7Z739	YTHDF3	YTH N(6)-methyladenosine RNA binding protein 3	1.36	0.443	0.00333282	0.0259028
ENSG00000119048	P63146	UBE2B	ubiquitin conjugating enzyme E2B	1.359	0.442	0.00399845	0.0298425
ENSG00000076043	Q9Y3B8	REXO2	RNA exonuclease 2	1.357	0.441	0.00350034	0.0269363
ENSG00000169714	P62633	CNBP	CCHC-type zinc finger, nucleic acid binding protein	1.357	0.44	0.0055757	0.0384112
ENSG00000129055	Q9BS18	ANAPC13	anaphase promoting complex subunit 13	1.355	0.438	0.00787397	0.0491043
ENSG00000113456	O60671	RAD1	RAD1 checkpoint DNA exonuclease	1.355	0.438	0.00711358	0.0458328
ENSG00000136754	Q8IZP0	ABI1	abl interactor 1	1.352	0.435	0.00125859	0.0122893
ENSG00000164342	O15455	TLR3	toll-like receptor 3	1.352	0.435	0.0053366	0.0370834
ENSG00000163870	Q86W33	TPRA1	transmembrane protein, adipocyte asscociated 1	1.352	0.435	0.00619121	0.0413769
ENSG00000134014	Q9H9T3	ELP3	elongator acetyltransferase complex subunit 3	1.351	0.434	0.00390754	0.0293518
ENSG00000198858	Q96D70	R3HDM4	R3H domain containing 4	1.347	0.43	0.00804994	0.0499025
ENSG00000166452	Q9NQ31	AKIP1	A-kinase interacting protein 1	1.346	0.429	0.00706518	0.0456489
ENSG00000169504	Q9Y696	CLIC4	chloride intracellular channel 4	1.346	0.429	0.00283461	0.0230346
ENSG00000134575	P11117	ACP2	acid phosphatase 2, lysosomal	1.344	0.426	0.0021213	0.0183217
ENSG00000135334	Q53H80	AKIRIN2	akirin 2	1.342	0.424	0.00774248	0.0485609
ENSG00000111897	Q9NRX5	SERINC1	serine incorporator 1	1.342	0.424	0.00730027	0.0466025
ENSG00000148572	Q96F24	NRBF2	nuclear receptor binding factor 2	1.341	0.423	0.00187794	0.0167198
ENSG00000120727	Q9BPZ3	PAIP2	poly(A) binding protein interacting protein 2	1.341	0.423	0.00645897	0.042605
ENSG00000132109	P19474	TRIM21	tripartite motif containing 21	1.338	0.42	0.00530299	0.0368868
ENSG00000217128	Q8TF40	FNIP1	folliculin interacting protein 1	1.337	0.419	0.00452501	0.0327457
ENSG00000143862	Q96BM9	ARL8A	ADP ribosylation factor like GTPase 8A	1.336	0.418	0.00157169	0.0145266
ENSG00000113851	Q96SW2	CRBN	cereblon	1.336	0.418	0.00549781	0.0379722
ENSG00000119414	O00743	PPP6C	protein phosphatase 6, catalytic subunit	1.336	0.418	0.0034659	0.0267175
ENSG00000144747	P82094	TMF1	TATA element modulatory factor 1	1.335	0.417	0.00565519	0.0388227
ENSG00000050130	Q9P055	JKAMP	JNK1/MAPK8-associated membrane protein	1.333	0.415	0.00382377	0.0288105
ENSG00000151332	Q9NS73	MBIP	MAP3K12 binding inhibitory protein 1	1.332	0.413	0.00705047	0.0456382
ENSG00000105879	Q75N03	CBLL1	Cbl proto-oncogene-like 1, E3 ubiquitin protein ligase	1.331	0.412	0.00288814	0.0233182
ENSG00000162819	Q5VW32	BROX	BRO1 domain and CAAX motif containing	1.33	0.411	0.00142457	0.0135227
ENSG00000110048	P22059	OSBP	oxysterol binding protein	1.327	0.409	0.00133512	0.0128674
ENSG00000129515	Q9UNH7	SNX6	sorting nexin 6	1.328	0.409	0.00766606	0.0481979
ENSG00000159202	Q9H832	UBE2Z	ubiquitin conjugating enzyme E2Z	1.324	0.404	0.0025473	0.0211492
ENSG00000132274	Q8IYM9	TRIM22	tripartite motif containing 22	1.322	0.403	0.0043323	0.0316874
ENSG00000108256	Q7Z417	NUFIP2	nuclear fragile X mental retardation protein interacting protein 2	1.321	0.402	0.00226446	0.0192701
ENSG00000125753	P50552	VASP	vasodilator-stimulated phosphoprotein	1.321	0.401	0.00401959	0.0299639
ENSG00000183486	P20592	MX2	MX dynamin-like GTPase 2	1.319	0.399	0.00466457	0.033453
ENSG00000164609	O95391	SLU7	SLU7 homolog, splicing factor	1.317	0.398	0.00645364	0.0425834
ENSG00000233608	Q8WVJ9	TWIST2	twist family bHLH transcription factor 2	1.317	0.398	0.0057259	0.0391477
ENSG00000129636	Q8TB96	ITFG1	integrin alpha FG-GAP repeat containing 1	1.316	0.396	0.00467551	0.0335199
ENSG00000105053	Q8IV63	VRK3	vaccinia related kinase 3	1.316	0.396	0.00599294	0.0404285
ENSG00000205189	Q96DT7	ZBTB10	zinc finger and BTB domain containing 10	1.313	0.393	0.00779652	0.0487528
ENSG00000104812	P13807	GYS1	glycogen synthase 1	1.311	0.39	0.0066026	0.0433599
ENSG00000033800	O75925	PIAS1	protein inhibitor of activated STAT 1	1.309	0.389	0.00208152	0.0180777
ENSG00000177879	Q92572	AP3S1	adaptor related protein complex 3, sigma 1 subunit	1.306	0.386	0.00514405	0.0360468
ENSG00000162191	Q04323	UBXN1	UBX domain protein 1	1.302	0.38	0.00765569	0.0481764
ENSG00000117614	O95926	SYF2	SYF2 pre-mRNA-splicing factor	1.297	0.376	0.0055022	0.0379803
ENSG00000180398	Q8NI22	MCFD2	multiple coagulation factor deficiency 2	1.295	0.373	0.00366735	0.0278778
ENSG00000138760	Q14108	SCARB2	scavenger receptor class B member 2	1.292	0.369	0.00445814	0.0323745
ENSG00000133106	Q96J88	EPSTI1	epithelial stromal interaction 1 (breast)	1.29	0.368	0.00750023	0.0474912
ENSG00000001629	Q9P2G1	ANKIB1	ankyrin repeat and IBR domain containing 1	1.286	0.363	0.00574272	0.0392498
ENSG00000136603	P12757	SKIL	SKI-like proto-oncogene	1.284	0.361	0.00615613	0.0411821
ENSG00000196365	P36776	LONP1	lon peptidase 1, mitochondrial	0.772	-0.373	0.00324124	0.0253904
ENSG00000116679	Q9Y6Y0	IVNS1ABP	influenza virus NS1A binding protein	0.758	-0.399	0.0033124	0.0258116
ENSG00000106009	Q6PJG6	BRAT1	BRCA1-associated ATM activator 1	0.755	-0.405	0.00600392	0.0404768
ENSG00000090621	Q13310	PABPC4	poly(A) binding protein, cytoplasmic 4 (inducible form)	0.753	-0.409	0.00255478	0.0211944
ENSG00000115526	O43529	CHST10	carbohydrate sulfotransferase 10	0.752	-0.41	0.00727085	0.0464575
ENSG00000106080	Q9NWM8	FKBP14	FK506 binding protein 14	0.752	-0.411	0.00598433	0.0403931
ENSG00000198925	Q7Z3C6	ATG9A	autophagy related 9A	0.751	-0.414	0.00356815	0.0273536
ENSG00000173402	Q14118	DAG1	dystroglycan 1	0.749	-0.417	0.00469193	0.0336244
ENSG00000078070	Q96RQ3	MCCC1	methylcrotonoyl-CoA carboxylase 1	0.747	-0.42	0.00273881	0.0223907
ENSG00000032444	Q8IY17	PNPLA6	patatin like phospholipase domain containing 6	0.747	-0.42	0.00608971	0.0408825
ENSG00000124535	Q96S55	WRNIP1	Werner helicase interacting protein 1	0.747	-0.421	0.00475463	0.03397
ENSG00000132612	Q9UN37	VPS4A	vacuolar protein sorting 4 homolog A (S. cerevisiae)	0.746	-0.423	0.00304166	0.0242284
ENSG00000198373	O00308	WWP2	WW domain containing E3 ubiquitin protein ligase 2	0.746	-0.423	0.00758424	0.0478549
ENSG00000101639	Q8TEP8	CEP192	centrosomal protein 192kDa	0.745	-0.424	0.00688751	0.0448767
ENSG00000164985	O75475	PSIP1	PC4 and SFRS1 interacting protein 1	0.744	-0.427	0.00322856	0.0253483
ENSG00000077097	Q02880	TOP2B	topoisomerase (DNA) II beta	0.744	-0.427	0.00246418	0.0206237
ENSG00000154736	Q9UNA0	ADAMTS5	ADAM metallopeptidase with thrombospondin type 1 motif 5	0.743	-0.429	0.00428037	0.0314236
ENSG00000112640	Q14738	PPP2R5D	protein phosphatase 2 regulatory subunit B', delta	0.741	-0.432	0.00155651	0.0144133
ENSG00000122912	P16260	SLC25A16	solute carrier family 25 (mitochondrial carrier), member 16	0.74	-0.434	0.00761649	0.0480024
ENSG00000166326	Q96DX7	TRIM44	tripartite motif containing 44	0.739	-0.437	0.00404114	0.030103
ENSG00000119906	Q8IX21	SLF2	SMC5-SMC6 complex localization factor 2	0.736	-0.442	0.00497594	0.0352105
ENSG00000158941	Q8N163	CCAR2	cell cycle and apoptosis regulator 2	0.734	-0.445	0.000851585	0.00904098
ENSG00000151458	Q9ULJ7	ANKRD50	ankyrin repeat domain 50	0.732	-0.449	0.00718588	0.0461495
ENSG00000071894	Q10570	CPSF1	cleavage and polyadenylation specific factor 1	0.732	-0.451	0.00518124	0.0362217
ENSG00000135457	Q12800	TFCP2	transcription factor CP2	0.731	-0.453	0.00358623	0.0274215
ENSG00000186575	P35240	NF2	neurofibromin 2 (merlin)	0.729	-0.456	0.00603371	0.0406114
ENSG00000153574	P49247	RPIA	ribose 5-phosphate isomerase A	0.729	-0.456	0.00745765	0.0473601
ENSG00000107854	Q9H2K2	TNKS2	tankyrase, TRF1-interacting ankyrin-related ADP-ribose polymerase 2	0.729	-0.456	0.00686831	0.0447937
ENSG00000040933	Q96PE3	INPP4A	inositol polyphosphate-4-phosphatase type I A	0.727	-0.46	0.0019669	0.0173337
ENSG00000066827	Q9P243	ZFAT	zinc finger and AT-hook domain containing	0.727	-0.46	0.000590378	0.00673173
ENSG00000102181	Q8TCZ2	CD99L2	CD99 molecule like 2	0.727	-0.461	0.00800245	0.0496821
ENSG00000108349	O15234	CASC3	cancer susceptibility candidate 3	0.725	-0.463	0.00231129	0.0195438
ENSG00000137815	Q92541	RTF1	RTF1 homolog, Paf1/RNA polymerase II complex component	0.725	-0.464	0.00710879	0.0458161
ENSG00000185379	O75771	RAD51D	RAD51 paralog D	0.724	-0.467	0.00411612	0.0305194
ENSG00000109189	P62068	USP46	ubiquitin specific peptidase 46	0.724	-0.467	0.00215072	0.0185084
ENSG00000173020	P25098	ADRBK1	adrenergic, beta, receptor kinase 1	0.723	-0.468	0.00744712	0.0473221
ENSG00000137959	Q53G44	IFI44L	interferon induced protein 44 like	0.722	-0.469	0.00427025	0.0313604
ENSG00000185818	Q8N9F0	NAT8L	N-acetyltransferase 8-like (GCN5-related, putative)	0.722	-0.47	0.00245962	0.0205939
ENSG00000130193	Q8WUY1	THEM6	thioesterase superfamily member 6	0.721	-0.471	0.00785421	0.0490252
ENSG00000155755	Q96Q45	TMEM237	transmembrane protein 237	0.721	-0.472	0.00439011	0.0320033
ENSG00000113758	Q16643	DBN1	drebrin 1	0.72	-0.475	0.000724442	0.00789974
ENSG00000104361	Q9H841	NIPAL2	NIPA-like domain containing 2	0.719	-0.475	0.00478896	0.0341465
ENSG00000134590	A6ZKI3	FAM127A	family with sequence similarity 127 member A	0.719	-0.476	0.0046344	0.0333147
ENSG00000122390	Q9H7X0	NAA60	N(alpha)-acetyltransferase 60, NatF catalytic subunit	0.719	-0.476	0.00563777	0.0387659
ENSG00000117906	Q14257	RCN2	reticulocalbin 2	0.718	-0.478	0.00709986	0.0457869
ENSG00000152291	O43493	TGOLN2	trans-golgi network protein 2	0.718	-0.478	0.00628773	0.0417872
ENSG00000170242	Q96K76	USP47	ubiquitin specific peptidase 47	0.717	-0.479	0.00518697	0.0362374
ENSG00000129680	Q8IWC1	MAP7D3	MAP7 domain containing 3	0.716	-0.481	0.00550523	0.0379887
ENSG00000006831	Q86V24	ADIPOR2	adiponectin receptor 2	0.716	-0.482	0.00595288	0.0402366
ENSG00000111554	Q8TC05	MDM1	Mdm1 nuclear protein	0.716	-0.482	0.00625177	0.0416392
ENSG00000160216	Q9NRZ7	AGPAT3	1-acylglycerol-3-phosphate O-acyltransferase 3	0.715	-0.483	0.00803556	0.0498578
ENSG00000140521	P54098	POLG	polymerase (DNA directed), gamma	0.715	-0.483	0.00190865	0.0169279
ENSG00000108578	Q13867	BLMH	bleomycin hydrolase	0.714	-0.486	0.00576652	0.0393607
ENSG00000100239	O75170	PPP6R2	protein phosphatase 6 regulatory subunit 2	0.714	-0.486	0.00482057	0.034288
ENSG00000120868	O14727	APAF1	apoptotic peptidase activating factor 1	0.712	-0.49	0.00603066	0.0406039
ENSG00000198055	P43250	GRK6	G protein-coupled receptor kinase 6	0.712	-0.49	0.00625297	0.0416392
ENSG00000185504	Q0VG06	FAAP100	Fanconi anemia core complex associated protein 100	0.711	-0.491	0.000619093	0.00699017
ENSG00000150756	Q6P4H8	FAM173B	family with sequence similarity 173 member B	0.71	-0.494	0.00379595	0.0286383
ENSG00000155850	P50443	SLC26A2	solute carrier family 26 (anion exchanger), member 2	0.71	-0.494	0.000611288	0.00692413
ENSG00000116667	Q9H246	C1orf21	chromosome 1 open reading frame 21	0.71	-0.495	0.00394614	0.0295861
ENSG00000010803	Q96GD3	SCMH1	sex comb on midleg homolog 1 (Drosophila)	0.71	-0.495	0.00722184	0.046281
ENSG00000170653	P17544	ATF7	activating transcription factor 7	0.709	-0.496	0.00731364	0.0466735
ENSG00000176834	Q8N0Z9	VSIG10	V-set and immunoglobulin domain containing 10	0.708	-0.498	0.00189247	0.016806
ENSG00000179295	Q06124	PTPN11	protein tyrosine phosphatase, non-receptor type 11	0.708	-0.499	0.00272662	0.02233
ENSG00000121940	Q96S66	CLCC1	chloride channel CLIC-like 1	0.707	-0.5	0.000691192	0.00761342
ENSG00000144283	Q99569	PKP4	plakophilin 4	0.707	-0.5	0.00116986	0.0116137
ENSG00000167674	Q7Z4V5	CTB-50L17.10	Hepatoma-derived growth factor-related protein 2	0.707	-0.501	0.00586337	0.0398644
ENSG00000134917	Q9UP79	ADAMTS8	ADAM metallopeptidase with thrombospondin type 1 motif 8	0.706	-0.502	0.00804855	0.0499025
ENSG00000108468	P83916	CBX1	chromobox 1	0.706	-0.502	0.00286246	0.0232009
ENSG00000142733	O95382	MAP3K6	mitogen-activated protein kinase kinase kinase 6	0.705	-0.504	0.0045812	0.0330055
ENSG00000166377	O43861	ATP9B	ATPase, class II, type 9B	0.705	-0.505	0.00404702	0.030136
ENSG00000143919	Q7Z624	CAMKMT	calmodulin-lysine N-methyltransferase	0.705	-0.505	0.00748621	0.0474761
ENSG00000120733	Q7LBC6	KDM3B	lysine (K)-specific demethylase 3B	0.705	-0.505	0.0030187	0.0241287
ENSG00000170100	Q96MU6	ZNF778	zinc finger protein 778	0.705	-0.505	0.00571626	0.0391075
ENSG00000015171	Q15326	ZMYND11	zinc finger, MYND-type containing 11	0.704	-0.507	0.000992144	0.0102049
ENSG00000149532	Q8N684	CPSF7	cleavage and polyadenylation specific factor 7	0.703	-0.508	0.000360209	0.00454313
ENSG00000075711	Q12959	DLG1	discs, large homolog 1 (Drosophila)	0.703	-0.508	0.00318335	0.0250406
ENSG00000084234	Q06481	APLP2	amyloid beta (A4) precursor-like protein 2	0.703	-0.509	0.00222211	0.0189952
ENSG00000132436	Q6PIW4	FIGNL1	fidgetin-like 1	0.703	-0.509	0.00804384	0.0498944
ENSG00000244486	Q96GP6	SCARF2	scavenger receptor class F member 2	0.702	-0.509	0.000770412	0.00830209
ENSG00000065413	Q8N8A2	ANKRD44	ankyrin repeat domain 44	0.702	-0.51	0.00374942	0.0283668
ENSG00000131374	Q92609	TBC1D5	TBC1 domain family member 5	0.702	-0.511	0.00622561	0.0415267
ENSG00000113761	Q9UL40	ZNF346	zinc finger protein 346	0.702	-0.511	0.00323314	0.0253676
ENSG00000179241	Q86YD5	LDLRAD3	low density lipoprotein receptor class A domain containing 3	0.701	-0.513	0.00624256	0.0415997
ENSG00000144028	O75643	SNRNP200	small nuclear ribonucleoprotein, U5 200kDa subunit	0.701	-0.513	0.00167991	0.0153233
ENSG00000196628	P15884	TCF4	transcription factor 4	0.701	-0.513	0.00626649	0.0416791
ENSG00000164237	Q96DG6	CMBL	carboxymethylenebutenolidase homolog (Pseudomonas)	0.7	-0.514	0.00406512	0.0301844
ENSG00000108389	Q9NYA4	MTMR4	myotubularin related protein 4	0.7	-0.514	0.00261516	0.021592
ENSG00000157600	Q5U3C3	TMEM164	transmembrane protein 164	0.701	-0.514	0.00756967	0.0478087
ENSG00000135048	Q9UHN6	TMEM2	transmembrane protein 2	0.7	-0.514	0.00622851	0.0415327
ENSG00000167528	Q96N77	ZNF641	zinc finger protein 641	0.7	-0.514	0.00639663	0.0423146
ENSG00000111642	Q14839	CHD4	chromodomain helicase DNA binding protein 4	0.7	-0.515	0.00129059	0.012537
ENSG00000089280	P35637	FUS	FUS RNA binding protein	0.7	-0.515	0.00341536	0.0264062
ENSG00000111203	Q969R8	ITFG2	integrin alpha FG-GAP repeat containing 2	0.699	-0.516	0.00326137	0.025503
ENSG00000001617	Q13275	SEMA3F	sema domain, immunoglobulin domain (Ig), short basic domain, secreted, (semaphorin) 3F	0.699	-0.516	0.00320218	0.0251602
ENSG00000147140	Q15233	NONO	non-POU domain containing, octamer-binding	0.698	-0.518	0.00248214	0.0207157
ENSG00000104866	O75864	PPP1R37	protein phosphatase 1 regulatory subunit 37	0.698	-0.518	0.00798325	0.0496303
ENSG00000131381	Q9H1K0	RBSN	rabenosyn, RAB effector	0.698	-0.518	0.00662424	0.0434815
ENSG00000172296	Q9NUV7	SPTLC3	serine palmitoyltransferase, long chain base subunit 3	0.698	-0.518	0.00644084	0.0425259
ENSG00000126878	Q9BQI0	AIF1L	allograft inflammatory factor 1-like	0.698	-0.52	0.00078511	0.00843425
ENSG00000109084	Q5BJF2	TMEM97	transmembrane protein 97	0.697	-0.52	0.000380864	0.00472908
ENSG00000077942	P23142	FBLN1	fibulin 1	0.696	-0.522	0.000435168	0.00524674
ENSG00000064651	P55011	SLC12A2	solute carrier family 12 (sodium/potassium/chloride transporter), member 2	0.697	-0.522	0.00706529	0.0456489
ENSG00000241973		PI4KA	phosphatidylinositol 4-kinase, catalytic, alpha	0.695	-0.525	0.00207231	0.0180184
ENSG00000106723	Q9Y657	SPIN1	spindlin 1	0.695	-0.525	0.00270316	0.0221777
ENSG00000089057	Q9UGH3	SLC23A2	solute carrier family 23 (ascorbic acid transporter), member 2	0.694	-0.526	0.00430689	0.0315515
ENSG00000185220	Q6P3X8	PGBD2	piggyBac transposable element derived 2	0.693	-0.528	0.00242259	0.0203494
ENSG00000140632	Q49A26	GLYR1	glyoxylate reductase 1 homolog (Arabidopsis)	0.693	-0.529	0.000377717	0.00470405
ENSG00000048828	Q9NZB2	FAM120A	family with sequence similarity 120A	0.693	-0.53	0.00118504	0.0117308
ENSG00000107164	Q96I24	FUBP3	far upstream element (FUSE) binding protein 3	0.693	-0.53	0.00230253	0.0195063
ENSG00000125520	Q9NR83	SLC2A4RG	SLC2A4 regulator	0.692	-0.53	0.00130024	0.0125974
ENSG00000082438	Q53SF7	COBLL1	cordon-bleu WH2 repeat protein like 1	0.692	-0.531	0.00604899	0.0406879
ENSG00000168807	Q13425	SNTB2	syntrophin, beta 2 (dystrophin-associated protein A1, 59kDa, basic component 2)	0.692	-0.531	0.00147735	0.0138655
ENSG00000168066	Q15637	SF1	splicing factor 1	0.692	-0.532	0.00722866	0.0462956
ENSG00000089902		RCOR1	REST corepressor 1	0.691	-0.533	0.00597491	0.0403593
ENSG00000124486	Q93008	USP9X	ubiquitin specific peptidase 9, X-linked	0.691	-0.533	0.00164622	0.0150696
ENSG00000185722	Q9P2R3	ANKFY1	ankyrin repeat and FYVE domain containing 1	0.691	-0.534	0.00523329	0.0364874
ENSG00000103653	P41240	CSK	c-src tyrosine kinase	0.691	-0.534	0.00291948	0.0235215
ENSG00000102974	P49711	CTCF	CCCTC-binding factor (zinc finger protein)	0.689	-0.538	0.000648401	0.00723664
ENSG00000127863	Q9NS68	TNFRSF19	tumor necrosis factor receptor superfamily member 19	0.689	-0.538	0.00493919	0.0349888
ENSG00000131089	O43307	ARHGEF9	Cdc42 guanine nucleotide exchange factor 9	0.688	-0.54	0.00162413	0.0149083
ENSG00000169515	Q9H0W5	CCDC8	coiled-coil domain containing 8	0.688	-0.54	0.00126635	0.0123476
ENSG00000152556	P08237	PFKM	phosphofructokinase, muscle	0.688	-0.54	0.00280863	0.0228716
ENSG00000106351	O95081	AGFG2	ArfGAP with FG repeats 2	0.687	-0.541	0.00615922	0.0411896
ENSG00000158526	Q969E8	TSR2	TSR2, 20S rRNA accumulation, homolog (S. cerevisiae)	0.687	-0.541	0.00242872	0.0203844
ENSG00000243335	Q96MP8	KCTD7	potassium channel tetramerization domain containing 7	0.686	-0.544	0.00325428	0.0254733
ENSG00000120068	P17481	HOXB8	homeobox B8	0.685	-0.545	0.00150588	0.0140801
ENSG00000163428	Q96CX6	LRRC58	leucine rich repeat containing 58	0.685	-0.547	0.00150631	0.0140801
ENSG00000101452	Q9H5Z1	DHX35	DEAH (Asp-Glu-Ala-His) box polypeptide 35	0.684	-0.548	0.00405455	0.0301559
ENSG00000112319	O95677	EYA4	EYA transcriptional coactivator and phosphatase 4	0.684	-0.549	0.000533293	0.00620326
ENSG00000162430	Q9NZV5	SEPN1	selenoprotein N, 1	0.684	-0.549	0.00770599	0.0483904
ENSG00000140320	Q8TBE0	BAHD1	bromo adjacent homology domain containing 1	0.683	-0.55	0.000661974	0.00734671
ENSG00000149657	Q9BX40	LSM14B	LSM family member 14B	0.683	-0.55	0.00121761	0.0119848
ENSG00000173540	Q9Y5P6	GMPPB	GDP-mannose pyrophosphorylase B	0.682	-0.551	0.00209928	0.018182
ENSG00000085511	Q9Y6R4	MAP3K4	mitogen-activated protein kinase kinase kinase 4	0.682	-0.551	0.00405667	0.0301559
ENSG00000136811	Q5BJF6	ODF2	outer dense fiber of sperm tails 2	0.682	-0.552	0.00423197	0.0311452
ENSG00000071655	O95983	MBD3	methyl-CpG binding domain protein 3	0.682	-0.553	0.00565277	0.0388227
ENSG00000146676	Q96QR8	PURB	purine-rich element binding protein B	0.682	-0.553	0.00230205	0.0195063
ENSG00000144043	Q6UWH6	TEX261	testis expressed 261	0.682	-0.553	0.0012384	0.0121491
ENSG00000095319	Q5SRE5	NUP188	nucleoporin 188kDa	0.681	-0.554	0.00426932	0.0313604
ENSG00000186350	P19793	RXRA	retinoid X receptor alpha	0.681	-0.555	0.00190352	0.0168896
ENSG00000118418	Q15651	HMGN3	high mobility group nucleosomal binding domain 3	0.68	-0.556	0.00205501	0.0179129
ENSG00000101152	Q9H3Z4	DNAJC5	DnaJ heat shock protein family (Hsp40) member C5	0.68	-0.557	0.0017517	0.0158468
ENSG00000063176	Q9NRA0	SPHK2	sphingosine kinase 2	0.68	-0.557	0.000821103	0.00877109
ENSG00000124608	Q5JTZ9	AARS2	alanyl-tRNA synthetase 2, mitochondrial	0.679	-0.558	0.00444265	0.0322958
ENSG00000166341	Q96JQ0	DCHS1	dachsous cadherin-related 1	0.679	-0.558	0.0052028	0.0363167
ENSG00000127804	Q86W50	METTL16	methyltransferase like 16	0.679	-0.559	0.000263923	0.00354743
ENSG00000171365	P51795	CLCN5	chloride channel, voltage-sensitive 5	0.678	-0.56	0.00675042	0.0441356
ENSG00000183580	Q9UJT9	FBXL7	F-box and leucine-rich repeat protein 7	0.678	-0.56	0.000228124	0.00314258
ENSG00000136928	O75899	GABBR2	gamma-aminobutyric acid (GABA) B receptor, 2	0.677	-0.563	0.00446079	0.0323824
ENSG00000110171	O75382	TRIM3	tripartite motif containing 3	0.677	-0.564	0.00300791	0.024061
ENSG00000102081	Q06787	FMR1	fragile X mental retardation 1	0.676	-0.565	0.00144343	0.0136518
ENSG00000181588	Q86XN8	MEX3D	mex-3 RNA binding family member D	0.676	-0.565	0.00115973	0.0115408
ENSG00000072062	P17612	PRKACA	protein kinase, cAMP-dependent, alpha catalytic subunit	0.676	-0.565	0.000225947	0.00312658
ENSG00000075568	Q92545	TMEM131	transmembrane protein 131	0.675	-0.566	0.00429454	0.0314832
ENSG00000130813	Q9NUL5	C19orf66	chromosome 19 open reading frame 66	0.675	-0.567	0.00357171	0.0273708
ENSG00000148730	Q13542	EIF4EBP2	eukaryotic translation initiation factor 4E binding protein 2	0.673	-0.571	0.00283683	0.0230346
ENSG00000164989	Q6TFL3	CCDC171	coiled-coil domain containing 171	0.673	-0.572	0.000600001	0.00682276
ENSG00000213853	P54851	EMP2	epithelial membrane protein 2	0.673	-0.572	1.20976e-05	0.000279872
ENSG00000105323	Q9BUJ2	HNRNPUL1	heterogeneous nuclear ribonucleoprotein U-like 1	0.672	-0.573	0.00108669	0.0109554
ENSG00000103197	P49815	TSC2	tuberous sclerosis 2	0.672	-0.573	0.00612788	0.0410327
ENSG00000159363	Q9NQ11	ATP13A2	ATPase type 13A2	0.671	-0.575	0.00297481	0.0238513
ENSG00000163625	Q8IZQ1	WDFY3	WD repeat and FYVE domain containing 3	0.671	-0.575	0.00157223	0.0145266
ENSG00000185024	Q92994	BRF1	BRF1, RNA polymerase III transcription initiation factor 90 kDa subunit	0.67	-0.578	0.000915584	0.00956419
ENSG00000168096	Q6ZW76	ANKS3	ankyrin repeat and sterile alpha motif domain containing 3	0.67	-0.579	0.00359536	0.027461
ENSG00000066739	Q96BY7	ATG2B	autophagy related 2B	0.669	-0.579	0.00474706	0.0339393
ENSG00000064607	Q8IX01	SUGP2	SURP and G-patch domain containing 2	0.669	-0.58	0.000700748	0.0076868
ENSG00000180979	Q8N9N7	LRRC57	leucine rich repeat containing 57	0.668	-0.582	0.00193308	0.0170791
ENSG00000145431	Q9NRA1	PDGFC	platelet derived growth factor C	0.667	-0.583	0.000124886	0.00191264
ENSG00000136699	Q9NXE4	SMPD4	sphingomyelin phosphodiesterase 4	0.668	-0.583	0.00462965	0.0332944
ENSG00000169718	Q6P1R4	DUS1L	dihydrouridine synthase 1-like	0.667	-0.584	0.00310803	0.0246064
ENSG00000063601	Q13613	MTMR1	myotubularin related protein 1	0.667	-0.584	3.86465e-05	0.000720262
ENSG00000154447	Q7Z6J0	SH3RF1	SH3 domain containing ring finger 1	0.667	-0.585	0.000432888	0.0052254
ENSG00000140025	Q9BUY7	EFCAB11	EF-hand calcium binding domain 11	0.666	-0.586	0.0063227	0.0419456
ENSG00000101350	O15066	KIF3B	kinesin family member 3B	0.666	-0.586	0.000278712	0.0037063
ENSG00000072310	P36956	SREBF1	sterol regulatory element binding transcription factor 1	0.666	-0.586	0.00417365	0.030858
ENSG00000163513	P37173	TGFBR2	transforming growth factor beta receptor II	0.666	-0.586	0.000356502	0.00450458
ENSG00000182872	P98175	RBM10	RNA binding motif protein 10	0.666	-0.587	0.00207652	0.0180475
ENSG00000105576	O14787	TNPO2	transportin 2	0.666	-0.587	0.000381906	0.00473636
ENSG00000138185	P49961	ENTPD1	ectonucleoside triphosphate diphosphohydrolase 1	0.665	-0.588	0.0017388	0.0157507
ENSG00000149503	Q9NQS7	INCENP	inner centromere protein	0.665	-0.588	0.00158162	0.0145809
ENSG00000065060	Q6BDS2	UHRF1BP1	UHRF1 binding protein 1	0.665	-0.588	0.00203278	0.0177488
ENSG00000198793	P42345	MTOR	mechanistic target of rapamycin (serine/threonine kinase)	0.665	-0.589	0.00118367	0.0117308
ENSG00000163536	Q99574	SERPINI1	serpin peptidase inhibitor, clade I (neuroserpin), member 1	0.665	-0.589	0.000781034	0.00840349
ENSG00000129484	Q9UGN5	PARP2	poly(ADP-ribose) polymerase 2	0.664	-0.59	0.00576473	0.0393607
ENSG00000148835	Q15542	TAF5	TATA-box binding protein associated factor 5	0.664	-0.59	0.00602387	0.0405752
ENSG00000188636	Q6ICC9	LDOC1L	leucine zipper, down-regulated in cancer 1-like	0.663	-0.592	0.00333092	0.0259028
ENSG00000106266	Q9Y5X2	SNX8	sorting nexin 8	0.663	-0.592	4.67126e-05	0.000848496
ENSG00000130592	P33241	LSP1	lymphocyte-specific protein 1	0.663	-0.593	4.77564e-05	0.000865944
ENSG00000006607	O94887	FARP2	FERM, ARH/RhoGEF and pleckstrin domain protein 2	0.662	-0.595	0.000402746	0.00493304
ENSG00000103064	Q92536	SLC7A6	solute carrier family 7 (amino acid transporter light chain, y+L system), member 6	0.662	-0.595	0.00735754	0.0469061
ENSG00000135966	Q8WUH2	TGFBRAP1	transforming growth factor beta receptor associated protein 1	0.662	-0.596	0.000720141	0.00786633
ENSG00000142039	Q96F63	CCDC97	coiled-coil domain containing 97	0.661	-0.597	9.29351e-05	0.00149141
ENSG00000070061	O95163	IKBKAP	inhibitor of kappa light polypeptide gene enhancer in B-cells, kinase complex-associated protein	0.661	-0.597	0.00382691	0.0288168
ENSG00000168067	Q12851	MAP4K2	mitogen-activated protein kinase kinase kinase kinase 2	0.661	-0.597	0.00709451	0.0457666
ENSG00000065613	Q9H2G2	SLK	STE20 like kinase	0.661	-0.597	0.00260729	0.0215616
ENSG00000160218	P48553	TRAPPC10	trafficking protein particle complex 10	0.661	-0.597	0.00247192	0.0206719
ENSG00000038358	Q6P2E9	EDC4	enhancer of mRNA decapping 4	0.661	-0.598	0.000621086	0.00700128
ENSG00000160360	Q86YR5	GPSM1	G-protein signaling modulator 1	0.661	-0.598	0.00404939	0.0301414
ENSG00000134986	Q16612	NREP	neuronal regeneration related protein	0.661	-0.598	0.00210535	0.0182218
ENSG00000111331	Q9Y6K5	OAS3	2'-5'-oligoadenylate synthetase 3	0.661	-0.598	0.0033566	0.0260196
ENSG00000175066	Q6ZS86	GK5	glycerol kinase 5 (putative)	0.66	-0.6	0.000922069	0.00961745
ENSG00000185730	Q9H7X3	ZNF696	zinc finger protein 696	0.66	-0.6	0.00142021	0.0134936
ENSG00000070718	P53677	AP3M2	adaptor related protein complex 3, mu 2 subunit	0.659	-0.601	5.26672e-05	0.000938013
ENSG00000173614	Q9HAN9	NMNAT1	nicotinamide nucleotide adenylyltransferase 1	0.659	-0.601	0.00460044	0.0331187
ENSG00000100726	Q9Y4R8	TELO2	telomere maintenance 2	0.659	-0.601	1.71527e-05	0.000375517
ENSG00000187239	Q96RU3	FNBP1	formin binding protein 1	0.659	-0.602	0.00270327	0.0221777
ENSG00000162139	Q9UQ49	NEU3	neuraminidase 3 (membrane sialidase)	0.659	-0.602	0.00607175	0.0408014
ENSG00000145675	P27986	PIK3R1	phosphoinositide-3-kinase regulatory subunit 1	0.659	-0.602	0.000175722	0.0025468
ENSG00000163093	Q8N3I7	BBS5	Bardet-Biedl syndrome 5	0.658	-0.603	0.00101025	0.0103351
ENSG00000168497	O95810	SDPR	serum deprivation response	0.658	-0.603	0.000294302	0.00386176
ENSG00000188735	A0PK00	TMEM120B	transmembrane protein 120B	0.658	-0.603	0.000647605	0.00723356
ENSG00000123575	Q6PEV8	FAM199X	family with sequence similarity 199, X-linked	0.657	-0.605	0.000644456	0.00721
ENSG00000163728	Q96N46	TTC14	tetratricopeptide repeat domain 14	0.658	-0.605	0.00579345	0.0394859
ENSG00000160991	Q96SN7	ORAI2	ORAI calcium release-activated calcium modulator 2	0.657	-0.606	0.00265793	0.0219016
ENSG00000182979	Q13330	MTA1	metastasis associated 1	0.656	-0.607	0.00700383	0.0454283
ENSG00000107130	P62166	NCS1	neuronal calcium sensor 1	0.657	-0.607	0.00168057	0.0153233
ENSG00000126216	Q96CW5	TUBGCP3	tubulin gamma complex associated protein 3	0.657	-0.607	0.000242171	0.0033009
ENSG00000149260	O15484	CAPN5	calpain 5	0.656	-0.608	0.00309241	0.0245293
ENSG00000101216	Q9UKD1	GMEB2	glucocorticoid modulatory element binding protein 2	0.656	-0.609	0.000714966	0.0078139
ENSG00000142207	O60287	URB1	URB1 ribosome biogenesis 1 homolog (S. cerevisiae)	0.655	-0.61	0.00505515	0.0355939
ENSG00000169738	Q7Z4W1	DCXR	dicarbonyl/L-xylulose reductase	0.654	-0.612	0.00667985	0.0437843
ENSG00000136982	Q9BVC3	DSCC1	DNA replication and sister chromatid cohesion 1	0.654	-0.612	0.00725648	0.0463942
ENSG00000181982	Q6ZUS6	CCDC149	coiled-coil domain containing 149	0.654	-0.613	0.00784359	0.0489736
ENSG00000108852	Q14168	MPP2	membrane protein, palmitoylated 2	0.654	-0.613	0.00520932	0.0363447
ENSG00000141252	Q5VIR6	VPS53	VPS53 GARP complex subunit	0.654	-0.613	0.00250645	0.0208631
ENSG00000153317	Q9ULH1	ASAP1	ArfGAP with SH3 domain, ankyrin repeat and PH domain 1	0.653	-0.614	0.00684908	0.0446823
ENSG00000182158	Q70SY1	CREB3L2	cAMP responsive element binding protein 3-like 2	0.653	-0.614	0.000180427	0.0026041
ENSG00000187555	Q93009	USP7	ubiquitin specific peptidase 7 (herpes virus-associated)	0.653	-0.615	0.003999	0.0298425
ENSG00000255150	Q8N140	EID3	EP300 interacting inhibitor of differentiation 3	0.652	-0.616	0.00195294	0.0172253
ENSG00000126012	P41229	KDM5C	lysine (K)-specific demethylase 5C	0.652	-0.617	0.00045334	0.00542183
ENSG00000178921	O15067	PFAS	phosphoribosylformylglycinamidine synthase	0.652	-0.617	0.00591493	0.0400843
ENSG00000011275	Q9NWF9	RNF216	ring finger protein 216	0.652	-0.617	0.0014151	0.0134696
ENSG00000100242	Q9UH99	SUN2	Sad1 and UNC84 domain containing 2	0.652	-0.617	0.000329566	0.00423367
ENSG00000102189	Q15075	EEA1	early endosome antigen 1	0.651	-0.619	0.000361977	0.0045599
ENSG00000141644	Q9UIS9	MBD1	methyl-CpG binding domain protein 1	0.651	-0.619	0.00113589	0.0113578
ENSG00000130939	O95155	UBE4B	ubiquitination factor E4B	0.651	-0.619	0.000527551	0.00615023
ENSG00000070882	Q9H4L5	OSBPL3	oxysterol binding protein like 3	0.651	-0.62	0.00140228	0.0133783
ENSG00000166224	O95470	SGPL1	sphingosine-1-phosphate lyase 1	0.651	-0.62	0.00143611	0.0135899
ENSG00000140474	Q6PHR2	ULK3	unc-51 like kinase 3	0.651	-0.62	6.32492e-05	0.00109348
ENSG00000184205	Q9H2G4	TSPYL2	TSPY-like 2	0.65	-0.621	0.00723959	0.0463289
ENSG00000196363	P61964	WDR5	WD repeat domain 5	0.65	-0.622	0.00234112	0.0197849
ENSG00000101191	Q9BTC0	DIDO1	death inducer-obliterator 1	0.649	-0.623	0.00568425	0.0389654
ENSG00000164663	Q70CQ1	USP49	ubiquitin specific peptidase 49	0.649	-0.623	0.00777199	0.0486679
ENSG00000101966	P98170	XIAP	X-linked inhibitor of apoptosis	0.649	-0.624	0.00067122	0.00742555
ENSG00000139517	Q8N448	LNX2	ligand of numb-protein X 2	0.649	-0.625	0.00252592	0.0210136
ENSG00000280789	Q9BTK6	PAGR1	PAXIP1 associated glutamate-rich protein 1	0.648	-0.625	0.00116254	0.0115576
ENSG00000105726	Q9HD20	ATP13A1	ATPase type 13A1	0.648	-0.627	0.00143427	0.013586
ENSG00000085788	O94830	DDHD2	DDHD domain containing 2	0.647	-0.627	0.000485128	0.00575542
ENSG00000067177	P46020	PHKA1	phosphorylase kinase, alpha 1 (muscle)	0.648	-0.627	0.000688762	0.00759135
ENSG00000116830	Q9UNY4	TTF2	transcription termination factor, RNA polymerase II	0.648	-0.627	0.00373339	0.028297
ENSG00000102901	Q96BT3	CENPT	centromere protein T	0.647	-0.628	0.00247202	0.0206719
ENSG00000115504	Q8NDI1	EHBP1	EH domain binding protein 1	0.647	-0.628	0.000501006	0.00591369
ENSG00000105290	P51693	APLP1	amyloid beta (A4) precursor-like protein 1	0.646	-0.629	0.00260976	0.0215645
ENSG00000197483	Q5EBL2	ZNF628	zinc finger protein 628	0.646	-0.629	0.00740236	0.0471216
ENSG00000113360	Q9NRR4	DROSHA	drosha, ribonuclease type III	0.646	-0.63	0.000515417	0.00604204
ENSG00000158301	Q96D09	GPRASP2	G protein-coupled receptor associated sorting protein 2	0.646	-0.63	0.0006935	0.00762337
ENSG00000169062	Q9H1J1	UPF3A	UPF3 regulator of nonsense transcripts homolog A (yeast)	0.646	-0.63	4.15523e-05	0.000768865
ENSG00000165724	Q96E35	ZMYND19	zinc finger, MYND-type containing 19	0.646	-0.63	0.00063125	0.00708924
ENSG00000100413	Q9Y535	POLR3H	polymerase (RNA) III (DNA directed) polypeptide H (22.9kD)	0.646	-0.631	2.35841e-05	0.000486544
ENSG00000115183	Q9C0D5	TANC1	tetratricopeptide repeat, ankyrin repeat and coiled-coil containing 1	0.645	-0.632	0.00142889	0.0135514
ENSG00000143799	P09874	PARP1	poly(ADP-ribose) polymerase 1	0.645	-0.633	0.00128692	0.0125072
ENSG00000168781	Q6PFW1	PPIP5K1	diphosphoinositol pentakisphosphate kinase 1	0.644	-0.635	0.00186043	0.0165923
ENSG00000183049	Q8IU85	CAMK1D	calcium/calmodulin dependent protein kinase ID	0.644	-0.636	0.0022902	0.0194335
ENSG00000160803	Q9NRR5	UBQLN4	ubiquilin 4	0.644	-0.636	0.000109393	0.00170936
ENSG00000152782	Q8TE04	PANK1	pantothenate kinase 1	0.643	-0.637	0.00288178	0.0232939
ENSG00000055332	P19525	EIF2AK2	eukaryotic translation initiation factor 2 alpha kinase 2	0.642	-0.638	0.00188271	0.0167551
ENSG00000078124	Q9NUN7	ACER3	alkaline ceramidase 3	0.642	-0.639	0.0072232	0.046281
ENSG00000180891	Q9NWM3	CUEDC1	CUE domain containing 1	0.642	-0.639	0.00208675	0.0180985
ENSG00000149091	Q13574	DGKZ	diacylglycerol kinase, zeta	0.642	-0.639	0.000345211	0.00440203
ENSG00000135686	Q8N4N3	KLHL36	kelch like family member 36	0.642	-0.639	0.0057741	0.0393737
ENSG00000184349	P52803	EFNA5	ephrin-A5	0.642	-0.64	0.00211143	0.0182668
ENSG00000092148	Q9ULT8	HECTD1	HECT domain containing E3 ubiquitin protein ligase 1	0.642	-0.64	3.63506e-05	0.000686044
ENSG00000170037	Q8N137	CNTROB	centrobin, centrosomal BRCA2 interacting protein	0.641	-0.642	0.0011683	0.0116038
ENSG00000136720	O60243	HS6ST1	heparan sulfate 6-O-sulfotransferase 1	0.64	-0.643	4.13608e-06	0.00011114
ENSG00000213463	P57105	SYNJ2BP	synaptojanin 2 binding protein	0.641	-0.643	0.00017313	0.00252331
ENSG00000137822	Q9UGJ1	TUBGCP4	tubulin gamma complex associated protein 4	0.64	-0.643	0.00097695	0.0100787
ENSG00000124164	O95292	VAPB	VAMP (vesicle-associated membrane protein)-associated protein B and C	0.64	-0.643	0.000338828	0.00433125
ENSG00000143772	P27987	ITPKB	inositol-trisphosphate 3-kinase B	0.64	-0.644	0.00397736	0.0297309
ENSG00000110514	Q8WXG6	MADD	MAP-kinase activating death domain	0.64	-0.644	0.000378786	0.00471143
ENSG00000138639	Q8N264	ARHGAP24	Rho GTPase activating protein 24	0.64	-0.645	2.98552e-05	0.000588
ENSG00000160208	Q14684	RRP1B	ribosomal RNA processing 1B	0.64	-0.645	0.00508846	0.0357654
ENSG00000122779	O15164	TRIM24	tripartite motif containing 24	0.639	-0.647	0.00021538	0.00300233
ENSG00000145022	P57738	TCTA	T-cell leukemia translocation altered	0.638	-0.648	1.5421e-05	0.00034339
ENSG00000160226	O43822	C21orf2	chromosome 21 open reading frame 2	0.638	-0.649	0.000570246	0.00653442
ENSG00000116984	Q99707	MTR	5-methyltetrahydrofolate-homocysteine methyltransferase	0.637	-0.65	0.001807	0.0162305
ENSG00000116649	P19623	SRM	spermidine synthase	0.637	-0.65	0.000787977	0.00846068
ENSG00000182253	O15061	SYNM	synemin	0.637	-0.65	0.00535882	0.0371757
ENSG00000175216	Q14008	CKAP5	cytoskeleton associated protein 5	0.637	-0.651	0.000948607	0.00983997
ENSG00000117122	P55001	MFAP2	microfibrillar associated protein 2	0.637	-0.651	0.00782295	0.048874
ENSG00000099875	Q9HBH9	MKNK2	MAP kinase interacting serine/threonine kinase 2	0.637	-0.651	0.00391483	0.0293735
ENSG00000159335	P20962	PTMS	parathymosin	0.637	-0.651	0.000174171	0.00253493
ENSG00000091136	P07942	LAMB1	laminin subunit beta 1	0.637	-0.652	2.78913e-05	0.000555104
ENSG00000147130	Q14202	ZMYM3	zinc finger, MYM-type 3	0.637	-0.652	7.81378e-05	0.00129079
ENSG00000102858	O60291	MGRN1	mahogunin ring finger 1, E3 ubiquitin protein ligase	0.635	-0.655	0.0031214	0.0246999
ENSG00000181827	Q2KHR2	RFX7	regulatory factor X7	0.634	-0.656	7.20078e-05	0.00120971
ENSG00000160293	P52735	VAV2	vav guanine nucleotide exchange factor 2	0.635	-0.656	0.000748116	0.00809117
ENSG00000109111	Q7KZ85	SUPT6H	SPT6 homolog, histone chaperone	0.634	-0.657	0.00198101	0.0174225
ENSG00000085224	P46100	ATRX	alpha thalassemia/mental retardation syndrome X-linked	0.634	-0.658	0.00327464	0.0255942
ENSG00000106004	P20719	HOXA5	homeobox A5	0.634	-0.658	0.00625789	0.0416392
ENSG00000196588	Q969V6	MKL1	megakaryoblastic leukemia (translocation) 1	0.634	-0.658	0.00796519	0.0495691
ENSG00000023516	Q9UKA4	AKAP11	A-kinase anchoring protein 11	0.633	-0.659	6.43242e-05	0.00110828
ENSG00000182670	P53804	TTC3	tetratricopeptide repeat domain 3	0.633	-0.659	0.00659729	0.0433525
ENSG00000213390	Q14CB8	ARHGAP19	Rho GTPase activating protein 19	0.633	-0.661	0.00441834	0.0321665
ENSG00000123411	Q9H2S9	IKZF4	IKAROS family zinc finger 4	0.632	-0.661	0.00139279	0.0133183
ENSG00000215193	Q7Z412	PEX26	peroxisomal biogenesis factor 26	0.632	-0.662	0.00152346	0.0141786
ENSG00000136010	Q3SY69	ALDH1L2	aldehyde dehydrogenase 1 family member L2	0.632	-0.663	0.00775828	0.048616
ENSG00000186638	Q5T7B8	KIF24	kinesin family member 24	0.632	-0.663	0.00089503	0.00941094
ENSG00000108219	Q8NG11	TSPAN14	tetraspanin 14	0.631	-0.663	4.32557e-05	0.000795431
ENSG00000273780	Q9P227	ARHGAP23	Rho GTPase activating protein 23	0.631	-0.664	0.0075304	0.0475771
ENSG00000100403	Q9UGR2	ZC3H7B	zinc finger CCCH-type containing 7B	0.631	-0.664	0.00548757	0.0379171
ENSG00000137504	Q9NS37	CREBZF	CREB/ATF bZIP transcription factor	0.631	-0.665	0.00107617	0.0108617
ENSG00000115419	O94925	GLS	glutaminase	0.631	-0.665	0.000118738	0.0018347
ENSG00000073536	Q9NVX2	NLE1	notchless homolog 1 (Drosophila)	0.631	-0.665	0.00620662	0.0414381
ENSG00000185219	P59923	ZNF445	zinc finger protein 445	0.631	-0.665	0.000161916	0.00239171
ENSG00000165801	Q8TER5	ARHGEF40	Rho guanine nucleotide exchange factor 40	0.63	-0.666	0.00611201	0.0409623
ENSG00000197858	O43292	GPAA1	glycosylphosphatidylinositol anchor attachment 1	0.63	-0.666	0.000164803	0.0024234
ENSG00000103495	P56270	MAZ	MYC-associated zinc finger protein (purine-binding transcription factor)	0.63	-0.666	4.77405e-06	0.000125525
ENSG00000215883	Q6IPT4	CYB5RL	cytochrome b5 reductase-like	0.63	-0.667	0.00504546	0.0355834
ENSG00000152784	Q9NQV8	PRDM8	PR domain containing 8	0.63	-0.667	2.03361e-05	0.000430702
ENSG00000094631	Q9UBN7	HDAC6	histone deacetylase 6	0.629	-0.668	4.02749e-06	0.000108784
ENSG00000018610	Q9H5V9	CXorf56	chromosome X open reading frame 56	0.628	-0.67	0.000658762	0.00732278
ENSG00000107821	Q96I82	KAZALD1	Kazal-type serine peptidase inhibitor domain 1	0.629	-0.67	0.000784354	0.00843425
ENSG00000100320	O43251	RBFOX2	RNA binding protein, fox-1 homolog (C. elegans) 2	0.629	-0.67	0.00568129	0.0389579
ENSG00000070961	P20020	ATP2B1	ATPase, Ca++ transporting, plasma membrane 1	0.628	-0.671	1.04452e-07	4.30178e-06
ENSG00000173442	Q8N3D4	EHBP1L1	EH domain binding protein 1 like 1	0.628	-0.672	0.00699632	0.0454149
ENSG00000185414	Q8TCC3	MRPL30	mitochondrial ribosomal protein L30	0.627	-0.672	0.00114281	0.0114161
ENSG00000126461	Q9H7N4	SCAF1	SR-related CTD-associated factor 1	0.628	-0.672	0.0045572	0.0328871
ENSG00000160710	P55265	ADAR	adenosine deaminase, RNA-specific	0.627	-0.673	0.000324779	0.0041877
ENSG00000141858		SAMD1	sterile alpha motif domain containing 1	0.627	-0.673	0.000107955	0.00169198
ENSG00000103148	Q12980	NPRL3	NPR3-like, GATOR1 complex subunit	0.627	-0.674	0.000180002	0.00259978
ENSG00000130338	Q9NRJ4	TULP4	tubby like protein 4	0.627	-0.674	0.00724838	0.0463594
ENSG00000104517	O95071	UBR5	ubiquitin protein ligase E3 component n-recognin 5	0.627	-0.674	0.00056869	0.00652018
ENSG00000198722	O14795	UNC13B	unc-13 homolog B (C. elegans)	0.627	-0.674	0.000235729	0.00323397
ENSG00000102241	O43719	HTATSF1	HIV-1 Tat specific factor 1	0.626	-0.676	0.00191913	0.0169847
ENSG00000037474	Q08J23	NSUN2	NOP2/Sun RNA methyltransferase family member 2	0.626	-0.676	0.00564033	0.0387665
ENSG00000127511	O75182	SIN3B	SIN3 transcription regulator family member B	0.626	-0.676	0.00297603	0.0238518
ENSG00000094916	P45973	CBX5	chromobox 5	0.625	-0.678	0.00465981	0.0334304
ENSG00000172301	Q9NQ92	COPRS	coordinator of PRMT5, differentiation stimulator	0.625	-0.678	0.00152052	0.0141747
ENSG00000002016	P43351	RAD52	RAD52 homolog, DNA repair protein	0.625	-0.678	0.000759459	0.00820452
ENSG00000143842	Q9UN79	SOX13	SRY-box 13	0.625	-0.678	0.00515272	0.0360587
ENSG00000105968	Q71UI9	H2AFV	H2A histone family member V	0.625	-0.679	0.00280601	0.0228591
ENSG00000183671	P46091	GPR1	G protein-coupled receptor 1	0.624	-0.68	0.00313378	0.0247291
ENSG00000147133	P21675	TAF1	TATA-box binding protein associated factor 1	0.624	-0.68	4.91843e-05	0.000885657
ENSG00000129351	Q12906	ILF3	interleukin enhancer binding factor 3	0.624	-0.681	0.00386787	0.0291147
ENSG00000007202	Q14667	KIAA0100	KIAA0100	0.624	-0.681	0.000353057	0.0044801
ENSG00000150457	Q9NRM7	LATS2	large tumor suppressor kinase 2	0.624	-0.681	0.00768404	0.0482672
ENSG00000158195	Q9Y6W5	WASF2	WAS protein family member 2	0.624	-0.681	0.000193355	0.00273938
ENSG00000143147	Q8N6U8	GPR161	G protein-coupled receptor 161	0.623	-0.682	0.000234138	0.00321639
ENSG00000189184	Q9HCL0	PCDH18	protocadherin 18	0.623	-0.682	0.00180718	0.0162305
ENSG00000165138	Q68DC2	ANKS6	ankyrin repeat and sterile alpha motif domain containing 6	0.623	-0.683	0.000322006	0.00415925
ENSG00000136068	O75369	FLNB	filamin B	0.623	-0.683	0.000589236	0.0067224
ENSG00000111371	Q9H2H9	SLC38A1	solute carrier family 38 member 1	0.623	-0.683	8.06968e-05	0.00132706
ENSG00000080839	P28749	RBL1	retinoblastoma-like 1	0.622	-0.685	0.0031424	0.0247747
ENSG00000087258	P09471	GNAO1	guanine nucleotide binding protein (G protein), alpha activating activity polypeptide O	0.622	-0.686	0.00771793	0.0484508
ENSG00000163930	Q92560	BAP1	BRCA1 associated protein 1	0.621	-0.687	3.03404e-05	0.000595302
ENSG00000125107	A5YKK6	CNOT1	CCR4-NOT transcription complex subunit 1	0.621	-0.687	0.00121224	0.0119376
ENSG00000140829	Q92620	DHX38	DEAH (Asp-Glu-Ala-His) box polypeptide 38	0.621	-0.687	0.000726709	0.00791314
ENSG00000170734	Q9Y253	POLH	polymerase (DNA directed), eta	0.621	-0.688	5.54849e-05	0.000980437
ENSG00000063244	P26368	U2AF2	U2 small nuclear RNA auxiliary factor 2	0.621	-0.688	7.04598e-05	0.00118658
ENSG00000158545	Q86VM9	ZC3H18	zinc finger CCCH-type containing 18	0.62	-0.691	0.00486877	0.0345954
ENSG00000265241	Q9Y5S9	RBM8A	RNA binding motif protein 8A	0.619	-0.692	6.28414e-05	0.00108824
ENSG00000158169	Q00597	FANCC	Fanconi anemia complementation group C	0.619	-0.693	0.00516569	0.0361373
ENSG00000196159	Q6V0I7	FAT4	FAT atypical cadherin 4	0.619	-0.693	0.000286316	0.00378083
ENSG00000147010	Q96B97	SH3KBP1	SH3-domain kinase binding protein 1	0.619	-0.693	1.11154e-06	3.508e-05
ENSG00000133816	O94851	MICAL2	microtubule associated monooxygenase, calponin and LIM domain containing 2	0.618	-0.694	0.00649544	0.0427851
ENSG00000177463	P49116	NR2C2	nuclear receptor subfamily 2 group C member 2	0.618	-0.694	0.00297442	0.0238513
ENSG00000035862	P16035	TIMP2	TIMP metallopeptidase inhibitor 2	0.618	-0.695	0.00371855	0.0282051
ENSG00000138658	Q86YA3	ZGRF1	zinc finger, GRF-type containing 1	0.618	-0.695	0.00790736	0.0492977
ENSG00000175115	Q6VY07	PACS1	phosphofurin acidic cluster sorting protein 1	0.617	-0.696	0.00584774	0.0397715
ENSG00000137802	O60336	MAPKBP1	mitogen-activated protein kinase binding protein 1	0.616	-0.698	0.0058854	0.0399398
ENSG00000148158	Q5VWJ9	SNX30	sorting nexin family member 30	0.617	-0.698	0.000934515	0.00971802
ENSG00000132780	P49321	NASP	nuclear autoantigenic sperm protein (histone-binding)	0.616	-0.699	0.00389178	0.0292629
ENSG00000157827	Q96PY5	FMNL2	formin like 2	0.616	-0.7	0.00180617	0.0162305
ENSG00000085733	Q14247	CTTN	cortactin	0.615	-0.701	0.00358059	0.0273985
ENSG00000165244	Q7RTV3	ZNF367	zinc finger protein 367	0.615	-0.702	0.000870987	0.00919533
ENSG00000165633	Q8IW00	VSTM4	V-set and transmembrane domain containing 4	0.614	-0.703	0.00477125	0.034042
ENSG00000215041	Q96JN8	NEURL4	neuralized E3 ubiquitin protein ligase 4	0.614	-0.704	0.00425256	0.0312746
ENSG00000116128	O00512	BCL9	B-cell CLL/lymphoma 9	0.613	-0.706	0.00545353	0.037732
ENSG00000173706	Q9ULI3	HEG1	heart development protein with EGF-like domains 1	0.612	-0.707	0.000305539	0.00398407
ENSG00000092445	Q06418	TYRO3	TYRO3 protein tyrosine kinase	0.613	-0.707	8.27458e-06	0.000201516
ENSG00000165684	Q5SXM2	SNAPC4	small nuclear RNA activating complex polypeptide 4	0.612	-0.708	0.00518625	0.0362374
ENSG00000109089	Q86X02	CDR2L	cerebellar degeneration-related protein 2-like	0.612	-0.709	7.25243e-05	0.00121559
ENSG00000087301	Q9P2K2	TXNDC16	thioredoxin domain containing 16	0.612	-0.709	0.00268735	0.0220915
ENSG00000160049	O00273	DFFA	DNA fragmentation factor, 45kDa, alpha polypeptide	0.611	-0.711	0.000184172	0.00263953
ENSG00000160972	Q96I34	PPP1R16A	protein phosphatase 1 regulatory subunit 16A	0.611	-0.711	0.00302639	0.024153
ENSG00000136295	Q9C0H2	TTYH3	tweety family member 3	0.611	-0.711	0.000645899	0.00722226
ENSG00000198700	Q96P70	IPO9	importin 9	0.61	-0.712	0.00146427	0.0137817
ENSG00000012232	O43909	EXTL3	exostosin-like glycosyltransferase 3	0.61	-0.713	0.000626053	0.007042
ENSG00000148411	Q96BF6	NACC2	NACC family member 2, BEN and BTB (POZ) domain containing	0.61	-0.713	1.07194e-05	0.000252768
ENSG00000103319	O00418	EEF2K	eukaryotic elongation factor 2 kinase	0.61	-0.714	0.00266541	0.0219459
ENSG00000189319	Q14153	FAM53B	family with sequence similarity 53 member B	0.609	-0.714	0.000596652	0.0067921
ENSG00000197386	P42858	HTT	huntingtin	0.61	-0.714	0.000395724	0.00486472
ENSG00000161021	Q92585	MAML1	mastermind like transcriptional coactivator 1	0.61	-0.714	0.00265001	0.021845
ENSG00000106785	Q14142	TRIM14	tripartite motif containing 14	0.61	-0.714	0.000128271	0.00195585
ENSG00000198917	Q5T280	C9orf114	chromosome 9 open reading frame 114	0.609	-0.715	0.00339779	0.0262801
ENSG00000197081	P11717	IGF2R	insulin like growth factor 2 receptor	0.609	-0.715	0.000417087	0.00506101
ENSG00000111696	Q86UY8	NT5DC3	5'-nucleotidase domain containing 3	0.609	-0.715	0.00397832	0.0297309
ENSG00000136731	Q9NYU2	UGGT1	UDP-glucose glycoprotein glucosyltransferase 1	0.609	-0.715	8.67311e-05	0.00140605
ENSG00000129473	Q92843	BCL2L2	BCL2-like 2	0.609	-0.716	0.000134341	0.00203667
ENSG00000132182	Q8TEM1	NUP210	nucleoporin 210kDa	0.609	-0.716	0.000136288	0.00206297
ENSG00000088247	Q92945	KHSRP	KH-type splicing regulatory protein	0.608	-0.717	0.00175078	0.0158454
ENSG00000092621	O43175	PHGDH	phosphoglycerate dehydrogenase	0.609	-0.717	0.006881	0.0448483
ENSG00000123066	Q71F56	MED13L	mediator complex subunit 13-like	0.608	-0.718	0.00479842	0.0341762
ENSG00000177732	O15370	SOX12	SRY-box 12	0.607	-0.72	0.00457317	0.0329795
ENSG00000083123	P21953	BCKDHB	branched chain keto acid dehydrogenase E1, beta polypeptide	0.607	-0.721	7.72491e-05	0.00127916
ENSG00000005469	Q9UKG9	CROT	carnitine O-octanoyltransferase	0.607	-0.721	0.000533019	0.00620326
ENSG00000108848	O95232	LUC7L3	LUC7-like 3 pre-mRNA splicing factor	0.606	-0.722	0.00230727	0.0195306
ENSG00000075407	P17032	ZNF37A	zinc finger protein 37A	0.606	-0.723	0.0045269	0.032748
ENSG00000114859	P51788	CLCN2	chloride channel, voltage-sensitive 2	0.606	-0.724	0.00525055	0.036571
ENSG00000197114	Q8N5A5	ZGPAT	zinc finger, CCCH-type with G-patch domain	0.605	-0.724	0.00763592	0.0480811
ENSG00000120685	Q86XN7	PROSER1	proline and serine rich 1	0.605	-0.726	0.00302486	0.0241501
ENSG00000161847	Q8IY67	RAVER1	ribonucleoprotein, PTB-binding 1	0.604	-0.726	0.00261657	0.021595
ENSG00000179195	Q8N3J9	ZNF664	zinc finger protein 664	0.605	-0.726	0.0018423	0.0164659
ENSG00000092847	Q9UL18	AGO1	argonaute 1, RISC catalytic component	0.604	-0.727	0.000221791	0.00307726
ENSG00000154380	Q8N8S7	ENAH	enabled homolog (Drosophila)	0.604	-0.727	0.000319479	0.00413216
ENSG00000179981	Q6ZSZ6	TSHZ1	teashirt zinc finger homeobox 1	0.604	-0.727	0.00329998	0.0257435
ENSG00000009954	Q9UIG0	BAZ1B	bromodomain adjacent to zinc finger domain 1B	0.604	-0.728	0.00147222	0.0138235
ENSG00000253729	P78527	PRKDC	protein kinase, DNA-activated, catalytic polypeptide	0.604	-0.728	0.00168587	0.0153581
ENSG00000172687	Q8NE65	ZNF738	zinc finger protein 738	0.604	-0.728	0.00453612	0.0327919
ENSG00000121957	P81274	GPSM2	G-protein signaling modulator 2	0.603	-0.73	1.37976e-05	0.000312937
ENSG00000160588	Q6UWV2	MPZL3	myelin protein zero-like 3	0.603	-0.73	0.000947244	0.00983564
ENSG00000151366	O95298	NDUFC2	NADH:ubiquinone oxidoreductase subunit C2	0.603	-0.731	6.68944e-05	0.0011432
ENSG00000187860	Q569K6	CCDC157	coiled-coil domain containing 157	0.602	-0.732	0.00413672	0.0306176
ENSG00000099991	Q9Y6J0	CABIN1	calcineurin binding protein 1	0.602	-0.733	0.00325924	0.0255025
ENSG00000123836	O60825	PFKFB2	6-phosphofructo-2-kinase/fructose-2,6-biphosphatase 2	0.601	-0.733	0.00248881	0.020763
ENSG00000189337	Q674X7	KAZN	kazrin, periplakin interacting protein	0.601	-0.734	5.02279e-05	0.000900552
ENSG00000184792	Q969R2	OSBP2	oxysterol binding protein 2	0.601	-0.734	0.00332018	0.0258529
ENSG00000173926	Q86UD3	MARCH3	membrane associated ring-CH-type finger 3	0.601	-0.735	0.00687258	0.0448075
ENSG00000020129	Q9UBB6	NCDN	neurochondrin	0.601	-0.735	0.000257604	0.00347223
ENSG00000115687	Q96RG2	PASK	PAS domain containing serine/threonine kinase	0.601	-0.735	0.000953782	0.00988871
ENSG00000163939	Q86U86	PBRM1	polybromo 1	0.601	-0.735	5.12804e-05	0.000915477
ENSG00000147044	O14936	CASK	calcium/calmodulin-dependent serine protein kinase (MAGUK family)	0.6	-0.737	3.38249e-05	0.00065073
ENSG00000081189	Q06413	MEF2C	myocyte enhancer factor 2C	0.599	-0.739	1.69063e-06	5.05532e-05
ENSG00000162512	O75056	SDC3	syndecan 3	0.599	-0.739	0.00413226	0.0305998
ENSG00000197226	Q66K14	TBC1D9B	TBC1 domain family member 9B	0.599	-0.739	0.000524419	0.00612058
ENSG00000139651	Q8NDX6	ZNF740	zinc finger protein 740	0.599	-0.739	0.000217409	0.00302858
ENSG00000169710	P49327	FASN	fatty acid synthase	0.599	-0.74	0.00134442	0.0129511
ENSG00000166484	Q13164	MAPK7	mitogen-activated protein kinase 7	0.599	-0.74	0.00107886	0.0108818
ENSG00000059145	Q9H9P5	UNKL	unkempt family zinc finger-like	0.599	-0.74	0.00026327	0.00354401
ENSG00000115464	Q70CQ2	USP34	ubiquitin specific peptidase 34	0.599	-0.74	1.42574e-05	0.000321961
ENSG00000100836	Q86U42	PABPN1	poly(A) binding protein, nuclear 1	0.598	-0.741	0.0018087	0.0162354
ENSG00000164576	Q9HAJ7	SAP30L	SAP30-like	0.598	-0.741	0.000698351	0.00766858
ENSG00000118922	Q9Y4X4	KLF12	Kruppel-like factor 12	0.598	-0.742	0.000300709	0.00392849
ENSG00000198890	Q96LA8	PRMT6	protein arginine methyltransferase 6	0.598	-0.742	0.00200767	0.0175813
ENSG00000139291	Q96HH6	TMEM19	transmembrane protein 19	0.598	-0.742	2.14129e-05	0.000450298
ENSG00000021826	P31327	CPS1	carbamoyl-phosphate synthase 1	0.598	-0.743	0.000263453	0.00354417
ENSG00000173905	O00461	GOLIM4	golgi integral membrane protein 4	0.598	-0.743	0.000597412	0.00679703
ENSG00000168939	O43610	SPRY3	sprouty RTK signaling antagonist 3	0.598	-0.743	0.00544778	0.0377048
ENSG00000148384	Q9NRR6	INPP5E	inositol polyphosphate-5-phosphatase E	0.597	-0.744	0.0072146	0.0462547
ENSG00000081026	Q5TCQ9	MAGI3	membrane associated guanylate kinase, WW and PDZ domain containing 3	0.597	-0.744	0.00021203	0.00296557
ENSG00000198089	A8K8P3	SFI1	SFI1 centrin binding protein	0.597	-0.745	0.00713846	0.0459646
ENSG00000196458	Q86T29	ZNF605	zinc finger protein 605	0.597	-0.745	0.00363806	0.0276956
ENSG00000103489	Q86Y38	XYLT1	xylosyltransferase I	0.596	-0.746	0.00371766	0.0282051
ENSG00000110237	Q96PE2	ARHGEF17	Rho guanine nucleotide exchange factor 17	0.596	-0.747	0.00323672	0.025374
ENSG00000141837	O00555	CACNA1A	calcium channel, voltage-dependent, P/Q type, alpha 1A subunit	0.596	-0.747	0.00432879	0.0316795
ENSG00000126214	Q07866	KLC1	kinesin light chain 1	0.596	-0.747	8.55557e-05	0.00139341
ENSG00000099957	O15547	P2RX6	purinergic receptor P2X, ligand gated ion channel, 6	0.596	-0.747	0.00673565	0.0440588
ENSG00000166166	Q96FX7	TRMT61A	tRNA methyltransferase 61A	0.596	-0.747	0.00128601	0.0125042
ENSG00000078699	O43439	CBFA2T2	core-binding factor, runt domain, alpha subunit 2	0.596	-0.748	0.00192501	0.0170222
ENSG00000196642	Q3YEC7	RABL6	RAB, member RAS oncogene family-like 6	0.596	-0.748	2.87747e-05	0.000570501
ENSG00000140443	P08069	IGF1R	insulin like growth factor 1 receptor	0.595	-0.749	3.64509e-05	0.000687313
ENSG00000164574	Q86SR1	GALNT10	polypeptide N-acetylgalactosaminyltransferase 10	0.595	-0.75	6.69522e-06	0.000169195
ENSG00000179134	Q5PRF9	SAMD4B	sterile alpha motif domain containing 4B	0.594	-0.751	0.00241867	0.0203331
ENSG00000054965	Q92567	FAM168A	family with sequence similarity 168 member A	0.594	-0.752	2.81752e-06	7.92946e-05
ENSG00000114698	Q9NRQ2	PLSCR4	phospholipid scramblase 4	0.594	-0.752	0.0020242	0.0176962
ENSG00000115306	Q01082	SPTBN1	spectrin, beta, non-erythrocytic 1	0.594	-0.752	0.00419413	0.0309324
ENSG00000143179	Q9BZX2	UCK2	uridine-cytidine kinase 2	0.594	-0.752	0.00560848	0.0386114
ENSG00000186635	Q96P48	ARAP1	ArfGAP with RhoGAP domain, ankyrin repeat and PH domain 1	0.593	-0.753	0.00434876	0.0317575
ENSG00000100139	Q8N3F8	MICALL1	MICAL like 1	0.593	-0.753	0.00721465	0.0462547
ENSG00000198952	Q9UPR3	SMG5	SMG5 nonsense mediated mRNA decay factor	0.593	-0.753	0.000907961	0.0094941
ENSG00000247077	Q96HS1	PGAM5	PGAM family member 5, serine/threonine protein phosphatase, mitochondrial	0.593	-0.754	0.00479992	0.0341762
ENSG00000088812	O75882	ATRN	attractin	0.592	-0.755	4.27659e-05	0.000788516
ENSG00000104381	Q8TB36	GDAP1	ganglioside induced differentiation associated protein 1	0.592	-0.756	0.00734017	0.0468285
ENSG00000167889	Q3V5L5	MGAT5B	mannosyl (alpha-1,6-)-glycoprotein beta-1,6-N-acetyl-glucosaminyltransferase, isozyme B	0.592	-0.756	0.00294916	0.0237004
ENSG00000184828	A1YPR0	ZBTB7C	zinc finger and BTB domain containing 7C	0.592	-0.757	0.00714754	0.0460089
ENSG00000141905	P08651	NFIC	nuclear factor I/C (CCAAT-binding transcription factor)	0.591	-0.758	0.00717318	0.0461121
ENSG00000140557	Q92186	ST8SIA2	ST8 alpha-N-acetyl-neuraminide alpha-2,8-sialyltransferase 2	0.591	-0.758	0.00611342	0.0409623
ENSG00000106714	Q9BZ76	CNTNAP3	contactin associated protein-like 3	0.591	-0.759	0.00015615	0.00231807
ENSG00000146592	Q02930	CREB5	cAMP responsive element binding protein 5	0.591	-0.759	0.00226694	0.0192834
ENSG00000130559	Q5T5Y3	CAMSAP1	calmodulin regulated spectrin associated protein 1	0.59	-0.76	0.000631276	0.00708924
ENSG00000155893	Q8TE99	PXYLP1	2-phosphoxylose phosphatase 1	0.591	-0.76	2.2787e-05	0.000474852
ENSG00000086475	P49903	SEPHS1	selenophosphate synthetase 1	0.59	-0.76	2.45882e-05	0.000500376
ENSG00000129347	Q8N9T8	KRI1	KRI1 homolog	0.59	-0.761	0.00288981	0.0233226
ENSG00000135862	P11047	LAMC1	laminin subunit gamma 1	0.59	-0.761	0.00114623	0.0114338
[truncated: 851 more rows]

## Sheet: Table S2
Level 1	Level 2	Level 3	Function	KO	Fold Change	log2 Fold Change	Highly Differentially Expressed ?	Adjusted p-value	Description	Associated Gene Name	UniProt/SwissProt Accession	Ensembl Id
Environmental Information Processing	Signal transduction	JAK-STAT signaling pathway	colony stimulating factor 2	K05427 CSF2; granulocyte-macrophage colony-stimulating factor	1316.85	10.363	Yes (up-regulated)	5.05057e-39	colony stimulating factor 2 (granulocyte-macrophage) [Source:HGNC Symbol;Acc:HGNC:2434]	CSF2	P04141	ENSG00000164400
Environmental Information Processing	Signal transduction	TNF signaling pathway	colony stimulating factor 2	K05427 CSF2; granulocyte-macrophage colony-stimulating factor	1316.85	10.363	Yes (up-regulated)	5.05057e-39	colony stimulating factor 2 (granulocyte-macrophage) [Source:HGNC Symbol;Acc:HGNC:2434]	CSF2	P04141	ENSG00000164400
Environmental Information Processing	Signaling molecules and interaction	Cytokine-cytokine receptor interaction	colony stimulating factor 2	K05427 CSF2; granulocyte-macrophage colony-stimulating factor	1316.85	10.363	Yes (up-regulated)	5.05057e-39	colony stimulating factor 2 (granulocyte-macrophage) [Source:HGNC Symbol;Acc:HGNC:2434]	CSF2	P04141	ENSG00000164400
Organismal Systems	Immune system	Fc epsilon RI signaling pathway	colony stimulating factor 2	K05427 CSF2; granulocyte-macrophage colony-stimulating factor	1316.85	10.363	Yes (up-regulated)	5.05057e-39	colony stimulating factor 2 (granulocyte-macrophage) [Source:HGNC Symbol;Acc:HGNC:2434]	CSF2	P04141	ENSG00000164400
Organismal Systems	Immune system	Hematopoietic cell lineage	colony stimulating factor 2	K05427 CSF2; granulocyte-macrophage colony-stimulating factor	1316.85	10.363	Yes (up-regulated)	5.05057e-39	colony stimulating factor 2 (granulocyte-macrophage) [Source:HGNC Symbol;Acc:HGNC:2434]	CSF2	P04141	ENSG00000164400
Organismal Systems	Immune system	IL-17 signaling pathway	colony stimulating factor 2	K05427 CSF2; granulocyte-macrophage colony-stimulating factor	1316.85	10.363	Yes (up-regulated)	5.05057e-39	colony stimulating factor 2 (granulocyte-macrophage) [Source:HGNC Symbol;Acc:HGNC:2434]	CSF2	P04141	ENSG00000164400
Organismal Systems	Immune system	Natural killer cell mediated cytotoxicity	colony stimulating factor 2	K05427 CSF2; granulocyte-macrophage colony-stimulating factor	1316.85	10.363	Yes (up-regulated)	5.05057e-39	colony stimulating factor 2 (granulocyte-macrophage) [Source:HGNC Symbol;Acc:HGNC:2434]	CSF2	P04141	ENSG00000164400
Organismal Systems	Immune system	T cell receptor signaling pathway	colony stimulating factor 2	K05427 CSF2; granulocyte-macrophage colony-stimulating factor	1316.85	10.363	Yes (up-regulated)	5.05057e-39	colony stimulating factor 2 (granulocyte-macrophage) [Source:HGNC Symbol;Acc:HGNC:2434]	CSF2	P04141	ENSG00000164400
Organismal Systems	Immune system	NOD-like receptor signaling pathway	MEFV innate immuity regulator, pyrin	K12803 MEFV; pyrin	410.796	8.682	Yes (up-regulated)	6.91001e-09	Mediterranean fever [Source:HGNC Symbol;Acc:HGNC:6998]	MEFV	O15553	ENSG00000103313
Environmental Information Processing	Signal transduction	TNF signaling pathway	C-C motif chemokine ligand 20	K14625 CCL20; C-C motif chemokine 20	396.658	8.632	Yes (up-regulated)	7.35593e-10	chemokine (C-C motif) ligand 20 [Source:HGNC Symbol;Acc:HGNC:10619]	CCL20	P78556	ENSG00000115009
Environmental Information Processing	Signaling molecules and interaction	Cytokine-cytokine receptor interaction	C-C motif chemokine ligand 20	K14625 CCL20; C-C motif chemokine 20	396.658	8.632	Yes (up-regulated)	7.35593e-10	chemokine (C-C motif) ligand 20 [Source:HGNC Symbol;Acc:HGNC:10619]	CCL20	P78556	ENSG00000115009
Environmental Information Processing	Signaling molecules and interaction	Viral protein interaction with cytokine and cytokine receptor	C-C motif chemokine ligand 20	K14625 CCL20; C-C motif chemokine 20	396.658	8.632	Yes (up-regulated)	7.35593e-10	chemokine (C-C motif) ligand 20 [Source:HGNC Symbol;Acc:HGNC:10619]	CCL20	P78556	ENSG00000115009
Organismal Systems	Immune system	Chemokine signaling pathway	C-C motif chemokine ligand 20	K14625 CCL20; C-C motif chemokine 20	396.658	8.632	Yes (up-regulated)	7.35593e-10	chemokine (C-C motif) ligand 20 [Source:HGNC Symbol;Acc:HGNC:10619]	CCL20	P78556	ENSG00000115009
Organismal Systems	Immune system	IL-17 signaling pathway	C-C motif chemokine ligand 20	K14625 CCL20; C-C motif chemokine 20	396.658	8.632	Yes (up-regulated)	7.35593e-10	chemokine (C-C motif) ligand 20 [Source:HGNC Symbol;Acc:HGNC:10619]	CCL20	P78556	ENSG00000115009
Environmental Information Processing	Signal transduction	JAK-STAT signaling pathway	colony stimulating factor 3	K05423 CSF3; granulocyte colony-stimulating factor	234.278	7.872	Yes (up-regulated)	3.0618e-07	colony stimulating factor 3 [Source:HGNC Symbol;Acc:HGNC:2438]	CSF3	P09919	ENSG00000108342
Environmental Information Processing	Signal transduction	PI3K-Akt signaling pathway	colony stimulating factor 3	K05423 CSF3; granulocyte colony-stimulating factor	234.278	7.872	Yes (up-regulated)	3.0618e-07	colony stimulating factor 3 [Source:HGNC Symbol;Acc:HGNC:2438]	CSF3	P09919	ENSG00000108342
Environmental Information Processing	Signaling molecules and interaction	Cytokine-cytokine receptor interaction	colony stimulating factor 3	K05423 CSF3; granulocyte colony-stimulating factor	234.278	7.872	Yes (up-regulated)	3.0618e-07	colony stimulating factor 3 [Source:HGNC Symbol;Acc:HGNC:2438]	CSF3	P09919	ENSG00000108342
Organismal Systems	Immune system	Hematopoietic cell lineage	colony stimulating factor 3	K05423 CSF3; granulocyte colony-stimulating factor	234.278	7.872	Yes (up-regulated)	3.0618e-07	colony stimulating factor 3 [Source:HGNC Symbol;Acc:HGNC:2438]	CSF3	P09919	ENSG00000108342
Organismal Systems	Immune system	IL-17 signaling pathway	colony stimulating factor 3	K05423 CSF3; granulocyte colony-stimulating factor	234.278	7.872	Yes (up-regulated)	3.0618e-07	colony stimulating factor 3 [Source:HGNC Symbol;Acc:HGNC:2438]	CSF3	P09919	ENSG00000108342
Environmental Information Processing	Signal transduction	TNF signaling pathway	C-X-C motif chemokine ligand 6	K05506 CXCL5_6; C-X-C motif chemokine 5/6	174.858	7.45	Yes (up-regulated)	1.66611e-68	chemokine (C-X-C motif) ligand 6 [Source:HGNC Symbol;Acc:HGNC:10643]	CXCL6	P80162	ENSG00000124875
Environmental Information Processing	Signaling molecules and interaction	Cytokine-cytokine receptor interaction	C-X-C motif chemokine ligand 6	K05506 CXCL5_6; C-X-C motif chemokine 5/6	174.858	7.45	Yes (up-regulated)	1.66611e-68	chemokine (C-X-C motif) ligand 6 [Source:HGNC Symbol;Acc:HGNC:10643]	CXCL6	P80162	ENSG00000124875
Environmental Information Processing	Signaling molecules and interaction	Viral protein interaction with cytokine and cytokine receptor	C-X-C motif chemokine ligand 6	K05506 CXCL5_6; C-X-C motif chemokine 5/6	174.858	7.45	Yes (up-regulated)	1.66611e-68	chemokine (C-X-C motif) ligand 6 [Source:HGNC Symbol;Acc:HGNC:10643]	CXCL6	P80162	ENSG00000124875
Organismal Systems	Immune system	Chemokine signaling pathway	C-X-C motif chemokine ligand 6	K05506 CXCL5_6; C-X-C motif chemokine 5/6	174.858	7.45	Yes (up-regulated)	1.66611e-68	chemokine (C-X-C motif) ligand 6 [Source:HGNC Symbol;Acc:HGNC:10643]	CXCL6	P80162	ENSG00000124875
Organismal Systems	Immune system	IL-17 signaling pathway	C-X-C motif chemokine ligand 6	K05506 CXCL5_6; C-X-C motif chemokine 5/6	174.858	7.45	Yes (up-regulated)	1.66611e-68	chemokine (C-X-C motif) ligand 6 [Source:HGNC Symbol;Acc:HGNC:10643]	CXCL6	P80162	ENSG00000124875
Cellular Processes	Cellular community - eukaryotes	Focal adhesion	integrin binding sialoprotein	K06253 IBSP; integrin binding sialoprotein	173.006	7.435	Yes (up-regulated)	1.48728e-08	integrin-binding sialoprotein [Source:HGNC Symbol;Acc:HGNC:5341]	IBSP	P21815	ENSG00000029559
Environmental Information Processing	Signal transduction	PI3K-Akt signaling pathway	integrin binding sialoprotein	K06253 IBSP; integrin binding sialoprotein	173.006	7.435	Yes (up-regulated)	1.48728e-08	integrin-binding sialoprotein [Source:HGNC Symbol;Acc:HGNC:5341]	IBSP	P21815	ENSG00000029559
Environmental Information Processing	Signaling molecules and interaction	ECM-receptor interaction	integrin binding sialoprotein	K06253 IBSP; integrin binding sialoprotein	173.006	7.435	Yes (up-regulated)	1.48728e-08	integrin-binding sialoprotein [Source:HGNC Symbol;Acc:HGNC:5341]	IBSP	P21815	ENSG00000029559
Not Included in Pathway or Brite	Unclassified: signaling and cellular processes	Signaling proteins	dishevelled binding antagonist of beta catenin 2	K22154 DACT; dapper	147.933	7.209	Yes (up-regulated)	2.75146e-06	dishevelled-binding antagonist of beta-catenin 2 [Source:HGNC Symbol;Acc:HGNC:21231]	DACT2	Q5SW24	ENSG00000164488
Cellular Processes	Cell growth and death	Cellular senescence	C-X-C motif chemokine ligand 8	K10030 IL8; interleukin 8	134.939	7.076	Yes (up-regulated)	2.42181e-08	chemokine (C-X-C motif) ligand 8 [Source:HGNC Symbol;Acc:HGNC:6025]	CXCL8	P10145	ENSG00000169429
Environmental Information Processing	Signal transduction	NF-kappa B signaling pathway	C-X-C motif chemokine ligand 8	K10030 IL8; interleukin 8	134.939	7.076	Yes (up-regulated)	2.42181e-08	chemokine (C-X-C motif) ligand 8 [Source:HGNC Symbol;Acc:HGNC:6025]	CXCL8	P10145	ENSG00000169429
Environmental Information Processing	Signal transduction	Phospholipase D signaling pathway	C-X-C motif chemokine ligand 8	K10030 IL8; interleukin 8	134.939	7.076	Yes (up-regulated)	2.42181e-08	chemokine (C-X-C motif) ligand 8 [Source:HGNC Symbol;Acc:HGNC:6025]	CXCL8	P10145	ENSG00000169429
Environmental Information Processing	Signaling molecules and interaction	Cytokine-cytokine receptor interaction	C-X-C motif chemokine ligand 8	K10030 IL8; interleukin 8	134.939	7.076	Yes (up-regulated)	2.42181e-08	chemokine (C-X-C motif) ligand 8 [Source:HGNC Symbol;Acc:HGNC:6025]	CXCL8	P10145	ENSG00000169429
Environmental Information Processing	Signaling molecules and interaction	Viral protein interaction with cytokine and cytokine receptor	C-X-C motif chemokine ligand 8	K10030 IL8; interleukin 8	134.939	7.076	Yes (up-regulated)	2.42181e-08	chemokine (C-X-C motif) ligand 8 [Source:HGNC Symbol;Acc:HGNC:6025]	CXCL8	P10145	ENSG00000169429
Organismal Systems	Immune system	Chemokine signaling pathway	C-X-C motif chemokine ligand 8	K10030 IL8; interleukin 8	134.939	7.076	Yes (up-regulated)	2.42181e-08	chemokine (C-X-C motif) ligand 8 [Source:HGNC Symbol;Acc:HGNC:6025]	CXCL8	P10145	ENSG00000169429
Organismal Systems	Immune system	IL-17 signaling pathway	C-X-C motif chemokine ligand 8	K10030 IL8; interleukin 8	134.939	7.076	Yes (up-regulated)	2.42181e-08	chemokine (C-X-C motif) ligand 8 [Source:HGNC Symbol;Acc:HGNC:6025]	CXCL8	P10145	ENSG00000169429
Organismal Systems	Immune system	NOD-like receptor signaling pathway	C-X-C motif chemokine ligand 8	K10030 IL8; interleukin 8	134.939	7.076	Yes (up-regulated)	2.42181e-08	chemokine (C-X-C motif) ligand 8 [Source:HGNC Symbol;Acc:HGNC:6025]	CXCL8	P10145	ENSG00000169429
Organismal Systems	Immune system	RIG-I-like receptor signaling pathway	C-X-C motif chemokine ligand 8	K10030 IL8; interleukin 8	134.939	7.076	Yes (up-regulated)	2.42181e-08	chemokine (C-X-C motif) ligand 8 [Source:HGNC Symbol;Acc:HGNC:6025]	CXCL8	P10145	ENSG00000169429
Organismal Systems	Immune system	Toll-like receptor signaling pathway	C-X-C motif chemokine ligand 8	K10030 IL8; interleukin 8	134.939	7.076	Yes (up-regulated)	2.42181e-08	chemokine (C-X-C motif) ligand 8 [Source:HGNC Symbol;Acc:HGNC:6025]	CXCL8	P10145	ENSG00000169429
Environmental Information Processing	Signal transduction	NF-kappa B signaling pathway	lipopolysaccharide binding protein	K05399 LBP; lipopolysaccharide-binding protein	128.367	7.004	Yes (up-regulated)	2.19351e-07	lipopolysaccharide binding protein [Source:HGNC Symbol;Acc:HGNC:6517]	LBP	P18428	ENSG00000129988
Organismal Systems	Immune system	Toll-like receptor signaling pathway	lipopolysaccharide binding protein	K05399 LBP; lipopolysaccharide-binding protein	128.367	7.004	Yes (up-regulated)	2.19351e-07	lipopolysaccharide binding protein [Source:HGNC Symbol;Acc:HGNC:6517]	LBP	P18428	ENSG00000129988
Cellular Processes	Cell growth and death	Necroptosis	interleukin 33	K12967 IL33; interleukin 33	119.353	6.899	Yes (up-regulated)	3.50654e-11	interleukin 33 [Source:HGNC Symbol;Acc:HGNC:16028]	IL33	O95760	ENSG00000137033
Environmental Information Processing	Signaling molecules and interaction	Cytokine-cytokine receptor interaction	interleukin 33	K12967 IL33; interleukin 33	119.353	6.899	Yes (up-regulated)	3.50654e-11	interleukin 33 [Source:HGNC Symbol;Acc:HGNC:16028]	IL33	O95760	ENSG00000137033
Organismal Systems	Immune system	Cytosolic DNA-sensing pathway	interleukin 33	K12967 IL33; interleukin 33	119.353	6.899	Yes (up-regulated)	3.50654e-11	interleukin 33 [Source:HGNC Symbol;Acc:HGNC:16028]	IL33	O95760	ENSG00000137033
Metabolism	Carbohydrate metabolism	Fructose and mannose metabolism	aldo-keto reductase family 1 member B10	K00011 AKR1B; aldehyde reductase [EC:1.1.1.21]	117.852	6.881	Yes (up-regulated)	1.52844e-05	aldo-keto reductase family 1, member B10 (aldose reductase) [Source:HGNC Symbol;Acc:HGNC:382]	AKR1B10	O60218	ENSG00000198074
Metabolism	Carbohydrate metabolism	Galactose metabolism	aldo-keto reductase family 1 member B10	K00011 AKR1B; aldehyde reductase [EC:1.1.1.21]	117.852	6.881	Yes (up-regulated)	1.52844e-05	aldo-keto reductase family 1, member B10 (aldose reductase) [Source:HGNC Symbol;Acc:HGNC:382]	AKR1B10	O60218	ENSG00000198074
Metabolism	Carbohydrate metabolism	Pentose and glucuronate interconversions	aldo-keto reductase family 1 member B10	K00011 AKR1B; aldehyde reductase [EC:1.1.1.21]	117.852	6.881	Yes (up-regulated)	1.52844e-05	aldo-keto reductase family 1, member B10 (aldose reductase) [Source:HGNC Symbol;Acc:HGNC:382]	AKR1B10	O60218	ENSG00000198074
Metabolism	Lipid metabolism	Glycerolipid metabolism	aldo-keto reductase family 1 member B10	K00011 AKR1B; aldehyde reductase [EC:1.1.1.21]	117.852	6.881	Yes (up-regulated)	1.52844e-05	aldo-keto reductase family 1, member B10 (aldose reductase) [Source:HGNC Symbol;Acc:HGNC:382]	AKR1B10	O60218	ENSG00000198074
Metabolism	Metabolism of cofactors and vitamins	Folate biosynthesis	aldo-keto reductase family 1 member B10	K00011 AKR1B; aldehyde reductase [EC:1.1.1.21]	117.852	6.881	Yes (up-regulated)	1.52844e-05	aldo-keto reductase family 1, member B10 (aldose reductase) [Source:HGNC Symbol;Acc:HGNC:382]	AKR1B10	O60218	ENSG00000198074
Environmental Information Processing	Signaling molecules and interaction	Cytokine-cytokine receptor interaction	C-C motif chemokine ligand 7	K05509 CCL7; C-C motif chemokine 7	99.498	6.637	Yes (up-regulated)	8.08813e-07	chemokine (C-C motif) ligand 7 [Source:HGNC Symbol;Acc:HGNC:10634]	CCL7	P80098	ENSG00000108688
Environmental Information Processing	Signaling molecules and interaction	Viral protein interaction with cytokine and cytokine receptor	C-C motif chemokine ligand 7	K05509 CCL7; C-C motif chemokine 7	99.498	6.637	Yes (up-regulated)	8.08813e-07	chemokine (C-C motif) ligand 7 [Source:HGNC Symbol;Acc:HGNC:10634]	CCL7	P80098	ENSG00000108688
Organismal Systems	Immune system	Chemokine signaling pathway	C-C motif chemokine ligand 7	K05509 CCL7; C-C motif chemokine 7	99.498	6.637	Yes (up-regulated)	8.08813e-07	chemokine (C-C motif) ligand 7 [Source:HGNC Symbol;Acc:HGNC:10634]	CCL7	P80098	ENSG00000108688
Organismal Systems	Immune system	IL-17 signaling pathway	C-C motif chemokine ligand 7	K05509 CCL7; C-C motif chemokine 7	99.498	6.637	Yes (up-regulated)	8.08813e-07	chemokine (C-C motif) ligand 7 [Source:HGNC Symbol;Acc:HGNC:10634]	CCL7	P80098	ENSG00000108688
Environmental Information Processing	Signal transduction	NF-kappa B signaling pathway	CD40 molecule	K03160 TNFRSF5; tumor necrosis factor receptor superfamily member 5	98.557	6.623	Yes (up-regulated)	2.19678e-21	CD40 molecule, TNF receptor superfamily member 5 [Source:HGNC Symbol;Acc:HGNC:11919]	CD40	P25942	ENSG00000101017
Environmental Information Processing	Signaling molecules and interaction	Cell adhesion molecules	CD40 molecule	K03160 TNFRSF5; tumor necrosis factor receptor superfamily member 5	98.557	6.623	Yes (up-regulated)	2.19678e-21	CD40 molecule, TNF receptor superfamily member 5 [Source:HGNC Symbol;Acc:HGNC:11919]	CD40	P25942	ENSG00000101017
Environmental Information Processing	Signaling molecules and interaction	Cytokine-cytokine receptor interaction	CD40 molecule	K03160 TNFRSF5; tumor necrosis factor receptor superfamily member 5	98.557	6.623	Yes (up-regulated)	2.19678e-21	CD40 molecule, TNF receptor superfamily member 5 [Source:HGNC Symbol;Acc:HGNC:11919]	CD40	P25942	ENSG00000101017
Organismal Systems	Immune system	Intestinal immune network for IgA production	CD40 molecule	K03160 TNFRSF5; tumor necrosis factor receptor superfamily member 5	98.557	6.623	Yes (up-regulated)	2.19678e-21	CD40 molecule, TNF receptor superfamily member 5 [Source:HGNC Symbol;Acc:HGNC:11919]	CD40	P25942	ENSG00000101017
Organismal Systems	Immune system	Toll-like receptor signaling pathway	CD40 molecule	K03160 TNFRSF5; tumor necrosis factor receptor superfamily member 5	98.557	6.623	Yes (up-regulated)	2.19678e-21	CD40 molecule, TNF receptor superfamily member 5 [Source:HGNC Symbol;Acc:HGNC:11919]	CD40	P25942	ENSG00000101017
Cellular Processes	Transport and catabolism	Phagosome	macrophage receptor with collagenous structure	K13884 MARCO; macrophage receptor with collagenous structure	92.7	6.535	Yes (up-regulated)	0.00030894	macrophage receptor with collagenous structure [Source:HGNC Symbol;Acc:HGNC:6895]	MARCO	Q9UEW3	ENSG00000019169
Environmental Information Processing	Signal transduction	Notch signaling pathway	delta like canonical Notch ligand 4	K06051 DLL; delta	81.219	6.344	Yes (up-regulated)	9.89472e-40	delta-like 4 (Drosophila) [Source:HGNC Symbol;Acc:HGNC:2910]	DLL4	Q9NR61	ENSG00000128917
Organismal Systems	Immune system	Th1 and Th2 cell differentiation	delta like canonical Notch ligand 4	K06051 DLL; delta	81.219	6.344	Yes (up-regulated)	9.89472e-40	delta-like 4 (Drosophila) [Source:HGNC Symbol;Acc:HGNC:2910]	DLL4	Q9NR61	ENSG00000128917
Environmental Information Processing	Signal transduction	Ras signaling pathway	phospholipase A2 group IIA	K01047 PLA2G; secretory phospholipase A2 [EC:3.1.1.4]	75.845	6.245	Yes (up-regulated)	0.00352276	phospholipase A2 group IIA [Source:HGNC Symbol;Acc:HGNC:9031]	PLA2G2A	P14555	ENSG00000188257
Metabolism	Lipid metabolism	alpha-Linolenic acid metabolism	phospholipase A2 group IIA	K01047 PLA2G; secretory phospholipase A2 [EC:3.1.1.4]	75.845	6.245	Yes (up-regulated)	0.00352276	phospholipase A2 group IIA [Source:HGNC Symbol;Acc:HGNC:9031]	PLA2G2A	P14555	ENSG00000188257
Metabolism	Lipid metabolism	Arachidonic acid metabolism	phospholipase A2 group IIA	K01047 PLA2G; secretory phospholipase A2 [EC:3.1.1.4]	75.845	6.245	Yes (up-regulated)	0.00352276	phospholipase A2 group IIA [Source:HGNC Symbol;Acc:HGNC:9031]	PLA2G2A	P14555	ENSG00000188257
Metabolism	Lipid metabolism	Ether lipid metabolism	phospholipase A2 group IIA	K01047 PLA2G; secretory phospholipase A2 [EC:3.1.1.4]	75.845	6.245	Yes (up-regulated)	0.00352276	phospholipase A2 group IIA [Source:HGNC Symbol;Acc:HGNC:9031]	PLA2G2A	P14555	ENSG00000188257
Metabolism	Lipid metabolism	Glycerophospholipid metabolism	phospholipase A2 group IIA	K01047 PLA2G; secretory phospholipase A2 [EC:3.1.1.4]	75.845	6.245	Yes (up-regulated)	0.00352276	phospholipase A2 group IIA [Source:HGNC Symbol;Acc:HGNC:9031]	PLA2G2A	P14555	ENSG00000188257
Metabolism	Lipid metabolism	Linoleic acid metabolism	phospholipase A2 group IIA	K01047 PLA2G; secretory phospholipase A2 [EC:3.1.1.4]	75.845	6.245	Yes (up-regulated)	0.00352276	phospholipase A2 group IIA [Source:HGNC Symbol;Acc:HGNC:9031]	PLA2G2A	P14555	ENSG00000188257
Organismal Systems	Circulatory system	Vascular smooth muscle contraction	phospholipase A2 group IIA	K01047 PLA2G; secretory phospholipase A2 [EC:3.1.1.4]	75.845	6.245	Yes (up-regulated)	0.00352276	phospholipase A2 group IIA [Source:HGNC Symbol;Acc:HGNC:9031]	PLA2G2A	P14555	ENSG00000188257
Organismal Systems	Digestive system	Fat digestion and absorption	phospholipase A2 group IIA	K01047 PLA2G; secretory phospholipase A2 [EC:3.1.1.4]	75.845	6.245	Yes (up-regulated)	0.00352276	phospholipase A2 group IIA [Source:HGNC Symbol;Acc:HGNC:9031]	PLA2G2A	P14555	ENSG00000188257
Organismal Systems	Digestive system	Pancreatic secretion	phospholipase A2 group IIA	K01047 PLA2G; secretory phospholipase A2 [EC:3.1.1.4]	75.845	6.245	Yes (up-regulated)	0.00352276	phospholipase A2 group IIA [Source:HGNC Symbol;Acc:HGNC:9031]	PLA2G2A	P14555	ENSG00000188257
Metabolism	Metabolism of cofactors and vitamins	Pantothenate and CoA biosynthesis	vanin 3	K08069 VNN; pantetheine hydrolase [EC:3.5.1.92]	62.984	5.977	Yes (up-regulated)	2.46531e-34	vanin 3 [Source:HGNC Symbol;Acc:HGNC:16431]	VNN3	Q9NY84	ENSG00000093134
Organismal Systems	Immune system	Complement and coagulation cascades	coagulation factor XI	K01323 F11; coagulation factor XI [EC:3.4.21.27]	57.463	5.845	Yes (up-regulated)	0.00114508	coagulation factor XI [Source:HGNC Symbol;Acc:HGNC:3529]	F11	P03951	ENSG00000088926
Cellular Processes	Cell growth and death	Apoptosis	BCL2 related protein A1	K02162 BCL2A1; hematopoietic Bcl-2-related protein A1	57.141	5.836	Yes (up-regulated)	1.71234e-07	BCL2-related protein A1 [Source:HGNC Symbol;Acc:HGNC:991]	BCL2A1	Q16548	ENSG00000140379
Environmental Information Processing	Signal transduction	NF-kappa B signaling pathway	BCL2 related protein A1	K02162 BCL2A1; hematopoietic Bcl-2-related protein A1	57.141	5.836	Yes (up-regulated)	1.71234e-07	BCL2-related protein A1 [Source:HGNC Symbol;Acc:HGNC:991]	BCL2A1	Q16548	ENSG00000140379
Organismal Systems	Endocrine system	Estrogen signaling pathway	keratin 34	K07604 KRT1; type I keratin, acidic	56.225	5.813	Yes (up-regulated)	3.36361e-14	keratin 34, type I [Source:HGNC Symbol;Acc:HGNC:6452]	KRT34	O76011	ENSG00000131737
Environmental Information Processing	Signal transduction	TNF signaling pathway	C-X3-C motif chemokine ligand 1	K05508 CX3CL1; C-X3-C motif chemokine 1	54.229	5.761	Yes (up-regulated)	4.36398e-05	chemokine (C-X3-C motif) ligand 1 [Source:HGNC Symbol;Acc:HGNC:10647]	CX3CL1	P78423	ENSG00000006210
Environmental Information Processing	Signaling molecules and interaction	Cytokine-cytokine receptor interaction	C-X3-C motif chemokine ligand 1	K05508 CX3CL1; C-X3-C motif chemokine 1	54.229	5.761	Yes (up-regulated)	4.36398e-05	chemokine (C-X3-C motif) ligand 1 [Source:HGNC Symbol;Acc:HGNC:10647]	CX3CL1	P78423	ENSG00000006210
Environmental Information Processing	Signaling molecules and interaction	Viral protein interaction with cytokine and cytokine receptor	C-X3-C motif chemokine ligand 1	K05508 CX3CL1; C-X3-C motif chemokine 1	54.229	5.761	Yes (up-regulated)	4.36398e-05	chemokine (C-X3-C motif) ligand 1 [Source:HGNC Symbol;Acc:HGNC:10647]	CX3CL1	P78423	ENSG00000006210
Organismal Systems	Immune system	Chemokine signaling pathway	C-X3-C motif chemokine ligand 1	K05508 CX3CL1; C-X3-C motif chemokine 1	54.229	5.761	Yes (up-regulated)	4.36398e-05	chemokine (C-X3-C motif) ligand 1 [Source:HGNC Symbol;Acc:HGNC:10647]	CX3CL1	P78423	ENSG00000006210
Metabolism	Lipid metabolism	Steroid hormone biosynthesis	hydroxysteroid 11-beta dehydrogenase 1	K15680 HSD11B1; corticosteroid 11-beta-dehydrogenase isozyme 1 [EC:1.1.1.146]	53.218	5.734	Yes (up-regulated)	0.000369201	hydroxysteroid (11-beta) dehydrogenase 1 [Source:HGNC Symbol;Acc:HGNC:5208]	HSD11B1	P28845	ENSG00000117594
Metabolism	Xenobiotics biodegradation and metabolism	Metabolism of xenobiotics by cytochrome P450	hydroxysteroid 11-beta dehydrogenase 1	K15680 HSD11B1; corticosteroid 11-beta-dehydrogenase isozyme 1 [EC:1.1.1.146]	53.218	5.734	Yes (up-regulated)	0.000369201	hydroxysteroid (11-beta) dehydrogenase 1 [Source:HGNC Symbol;Acc:HGNC:5208]	HSD11B1	P28845	ENSG00000117594
Environmental Information Processing	Signal transduction	TNF signaling pathway	C-X-C motif chemokine ligand 10	K12671 CXCL10; C-X-C motif chemokine 10	48.415	5.597	Yes (up-regulated)	7.39854e-11	chemokine (C-X-C motif) ligand 10 [Source:HGNC Symbol;Acc:HGNC:10637]	CXCL10	P02778	ENSG00000169245
Environmental Information Processing	Signaling molecules and interaction	Cytokine-cytokine receptor interaction	C-X-C motif chemokine ligand 10	K12671 CXCL10; C-X-C motif chemokine 10	48.415	5.597	Yes (up-regulated)	7.39854e-11	chemokine (C-X-C motif) ligand 10 [Source:HGNC Symbol;Acc:HGNC:10637]	CXCL10	P02778	ENSG00000169245
Environmental Information Processing	Signaling molecules and interaction	Viral protein interaction with cytokine and cytokine receptor	C-X-C motif chemokine ligand 10	K12671 CXCL10; C-X-C motif chemokine 10	48.415	5.597	Yes (up-regulated)	7.39854e-11	chemokine (C-X-C motif) ligand 10 [Source:HGNC Symbol;Acc:HGNC:10637]	CXCL10	P02778	ENSG00000169245
Organismal Systems	Immune system	Chemokine signaling pathway	C-X-C motif chemokine ligand 10	K12671 CXCL10; C-X-C motif chemokine 10	48.415	5.597	Yes (up-regulated)	7.39854e-11	chemokine (C-X-C motif) ligand 10 [Source:HGNC Symbol;Acc:HGNC:10637]	CXCL10	P02778	ENSG00000169245
Organismal Systems	Immune system	Cytosolic DNA-sensing pathway	C-X-C motif chemokine ligand 10	K12671 CXCL10; C-X-C motif chemokine 10	48.415	5.597	Yes (up-regulated)	7.39854e-11	chemokine (C-X-C motif) ligand 10 [Source:HGNC Symbol;Acc:HGNC:10637]	CXCL10	P02778	ENSG00000169245
Organismal Systems	Immune system	IL-17 signaling pathway	C-X-C motif chemokine ligand 10	K12671 CXCL10; C-X-C motif chemokine 10	48.415	5.597	Yes (up-regulated)	7.39854e-11	chemokine (C-X-C motif) ligand 10 [Source:HGNC Symbol;Acc:HGNC:10637]	CXCL10	P02778	ENSG00000169245
Organismal Systems	Immune system	RIG-I-like receptor signaling pathway	C-X-C motif chemokine ligand 10	K12671 CXCL10; C-X-C motif chemokine 10	48.415	5.597	Yes (up-regulated)	7.39854e-11	chemokine (C-X-C motif) ligand 10 [Source:HGNC Symbol;Acc:HGNC:10637]	CXCL10	P02778	ENSG00000169245
Organismal Systems	Immune system	Toll-like receptor signaling pathway	C-X-C motif chemokine ligand 10	K12671 CXCL10; C-X-C motif chemokine 10	48.415	5.597	Yes (up-regulated)	7.39854e-11	chemokine (C-X-C motif) ligand 10 [Source:HGNC Symbol;Acc:HGNC:10637]	CXCL10	P02778	ENSG00000169245
Cellular Processes	Cell growth and death	Ferroptosis	ceruloplasmin	K13624 CP; ceruloplasmin [EC:1.16.3.1]	46.487	5.539	Yes (up-regulated)	7.7703e-08	ceruloplasmin (ferroxidase) [Source:HGNC Symbol;Acc:HGNC:2295]	CP	P00450	ENSG00000047457
Metabolism	Metabolism of cofactors and vitamins	Porphyrin and chlorophyll metabolism	ceruloplasmin	K13624 CP; ceruloplasmin [EC:1.16.3.1]	46.487	5.539	Yes (up-regulated)	7.7703e-08	ceruloplasmin (ferroxidase) [Source:HGNC Symbol;Acc:HGNC:2295]	CP	P00450	ENSG00000047457
Environmental Information Processing	Signal transduction	NF-kappa B signaling pathway	TNF superfamily member 14	K05477 TNFSF14; tumor necrosis factor ligand superfamily member 14	45.013	5.492	Yes (up-regulated)	0.00224101	tumor necrosis factor superfamily member 14 [Source:HGNC Symbol;Acc:HGNC:11930]	TNFSF14	O43557	ENSG00000125735
Environmental Information Processing	Signaling molecules and interaction	Cytokine-cytokine receptor interaction	TNF superfamily member 14	K05477 TNFSF14; tumor necrosis factor ligand superfamily member 14	45.013	5.492	Yes (up-regulated)	0.00224101	tumor necrosis factor superfamily member 14 [Source:HGNC Symbol;Acc:HGNC:11930]	TNFSF14	O43557	ENSG00000125735
Environmental Information Processing	Signaling molecules and interaction	Viral protein interaction with cytokine and cytokine receptor	TNF superfamily member 14	K05477 TNFSF14; tumor necrosis factor ligand superfamily member 14	45.013	5.492	Yes (up-regulated)	0.00224101	tumor necrosis factor superfamily member 14 [Source:HGNC Symbol;Acc:HGNC:11930]	TNFSF14	O43557	ENSG00000125735
Cellular Processes	Cell growth and death	Cellular senescence	interleukin 6	K05405 IL6; interleukin 6	44.679	5.482	Yes (up-regulated)	7.28959e-10	interleukin 6 [Source:HGNC Symbol;Acc:HGNC:6018]	IL6	P05231	ENSG00000136244
Environmental Information Processing	Signal transduction	FoxO signaling pathway	interleukin 6	K05405 IL6; interleukin 6	44.679	5.482	Yes (up-regulated)	7.28959e-10	interleukin 6 [Source:HGNC Symbol;Acc:HGNC:6018]	IL6	P05231	ENSG00000136244
Environmental Information Processing	Signal transduction	HIF-1 signaling pathway	interleukin 6	K05405 IL6; interleukin 6	44.679	5.482	Yes (up-regulated)	7.28959e-10	interleukin 6 [Source:HGNC Symbol;Acc:HGNC:6018]	IL6	P05231	ENSG00000136244
Environmental Information Processing	Signal transduction	JAK-STAT signaling pathway	interleukin 6	K05405 IL6; interleukin 6	44.679	5.482	Yes (up-regulated)	7.28959e-10	interleukin 6 [Source:HGNC Symbol;Acc:HGNC:6018]	IL6	P05231	ENSG00000136244
Environmental Information Processing	Signal transduction	PI3K-Akt signaling pathway	interleukin 6	K05405 IL6; interleukin 6	44.679	5.482	Yes (up-regulated)	7.28959e-10	interleukin 6 [Source:HGNC Symbol;Acc:HGNC:6018]	IL6	P05231	ENSG00000136244
Environmental Information Processing	Signal transduction	TNF signaling pathway	interleukin 6	K05405 IL6; interleukin 6	44.679	5.482	Yes (up-regulated)	7.28959e-10	interleukin 6 [Source:HGNC Symbol;Acc:HGNC:6018]	IL6	P05231	ENSG00000136244
Environmental Information Processing	Signaling molecules and interaction	Cytokine-cytokine receptor interaction	interleukin 6	K05405 IL6; interleukin 6	44.679	5.482	Yes (up-regulated)	7.28959e-10	interleukin 6 [Source:HGNC Symbol;Acc:HGNC:6018]	IL6	P05231	ENSG00000136244
Environmental Information Processing	Signaling molecules and interaction	Viral protein interaction with cytokine and cytokine receptor	interleukin 6	K05405 IL6; interleukin 6	44.679	5.482	Yes (up-regulated)	7.28959e-10	interleukin 6 [Source:HGNC Symbol;Acc:HGNC:6018]	IL6	P05231	ENSG00000136244
Organismal Systems	Immune system	C-type lectin receptor signaling pathway	interleukin 6	K05405 IL6; interleukin 6	44.679	5.482	Yes (up-regulated)	7.28959e-10	interleukin 6 [Source:HGNC Symbol;Acc:HGNC:6018]	IL6	P05231	ENSG00000136244
Organismal Systems	Immune system	Cytosolic DNA-sensing pathway	interleukin 6	K05405 IL6; interleukin 6	44.679	5.482	Yes (up-regulated)	7.28959e-10	interleukin 6 [Source:HGNC Symbol;Acc:HGNC:6018]	IL6	P05231	ENSG00000136244
Organismal Systems	Immune system	Hematopoietic cell lineage	interleukin 6	K05405 IL6; interleukin 6	44.679	5.482	Yes (up-regulated)	7.28959e-10	interleukin 6 [Source:HGNC Symbol;Acc:HGNC:6018]	IL6	P05231	ENSG00000136244
Organismal Systems	Immune system	IL-17 signaling pathway	interleukin 6	K05405 IL6; interleukin 6	44.679	5.482	Yes (up-regulated)	7.28959e-10	interleukin 6 [Source:HGNC Symbol;Acc:HGNC:6018]	IL6	P05231	ENSG00000136244
Organismal Systems	Immune system	Intestinal immune network for IgA production	interleukin 6	K05405 IL6; interleukin 6	44.679	5.482	Yes (up-regulated)	7.28959e-10	interleukin 6 [Source:HGNC Symbol;Acc:HGNC:6018]	IL6	P05231	ENSG00000136244
Organismal Systems	Immune system	NOD-like receptor signaling pathway	interleukin 6	K05405 IL6; interleukin 6	44.679	5.482	Yes (up-regulated)	7.28959e-10	interleukin 6 [Source:HGNC Symbol;Acc:HGNC:6018]	IL6	P05231	ENSG00000136244
Organismal Systems	Immune system	Th17 cell differentiation	interleukin 6	K05405 IL6; interleukin 6	44.679	5.482	Yes (up-regulated)	7.28959e-10	interleukin 6 [Source:HGNC Symbol;Acc:HGNC:6018]	IL6	P05231	ENSG00000136244
Organismal Systems	Immune system	Toll-like receptor signaling pathway	interleukin 6	K05405 IL6; interleukin 6	44.679	5.482	Yes (up-regulated)	7.28959e-10	interleukin 6 [Source:HGNC Symbol;Acc:HGNC:6018]	IL6	P05231	ENSG00000136244
Not Included in Pathway or Brite	Unclassified: signaling and cellular processes	Signaling proteins	TNFAIP3 interacting protein 3	K23836 TNIP3; TNFAIP3-interacting protein 3	44.248	5.468	Yes (up-regulated)	0.00203742	TNFAIP3 interacting protein 3 [Source:HGNC Symbol;Acc:HGNC:19315]	TNIP3	Q96KP6	ENSG00000050730
Environmental Information Processing	Signal transduction	NF-kappa B signaling pathway	intercellular adhesion molecule 1	K06490 ICAM1; intercellular adhesion molecule 1	40.964	5.356	Yes (up-regulated)	2.37015e-58	intercellular adhesion molecule 1 [Source:HGNC Symbol;Acc:HGNC:5344]	ICAM1	P05362	ENSG00000090339
Environmental Information Processing	Signal transduction	TNF signaling pathway	intercellular adhesion molecule 1	K06490 ICAM1; intercellular adhesion molecule 1	40.964	5.356	Yes (up-regulated)	2.37015e-58	intercellular adhesion molecule 1 [Source:HGNC Symbol;Acc:HGNC:5344]	ICAM1	P05362	ENSG00000090339
Environmental Information Processing	Signaling molecules and interaction	Cell adhesion molecules	intercellular adhesion molecule 1	K06490 ICAM1; intercellular adhesion molecule 1	40.964	5.356	Yes (up-regulated)	2.37015e-58	intercellular adhesion molecule 1 [Source:HGNC Symbol;Acc:HGNC:5344]	ICAM1	P05362	ENSG00000090339
Organismal Systems	Immune system	Leukocyte transendothelial migration	intercellular adhesion molecule 1	K06490 ICAM1; intercellular adhesion molecule 1	40.964	5.356	Yes (up-regulated)	2.37015e-58	intercellular adhesion molecule 1 [Source:HGNC Symbol;Acc:HGNC:5344]	ICAM1	P05362	ENSG00000090339
Organismal Systems	Immune system	Natural killer cell mediated cytotoxicity	intercellular adhesion molecule 1	K06490 ICAM1; intercellular adhesion molecule 1	40.964	5.356	Yes (up-regulated)	2.37015e-58	intercellular adhesion molecule 1 [Source:HGNC Symbol;Acc:HGNC:5344]	ICAM1	P05362	ENSG00000090339
Cellular Processes	Cell growth and death	Necroptosis	interleukin 1 beta	K04519 IL1B; interleukin 1 beta	40.449	5.338	Yes (up-regulated)	8.05769e-74	interleukin 1 beta [Source:HGNC Symbol;Acc:HGNC:5992]	IL1B	P01584	ENSG00000125538
Environmental Information Processing	Signal transduction	MAPK signaling pathway	interleukin 1 beta	K04519 IL1B; interleukin 1 beta	40.449	5.338	Yes (up-regulated)	8.05769e-74	interleukin 1 beta [Source:HGNC Symbol;Acc:HGNC:5992]	IL1B	P01584	ENSG00000125538
Environmental Information Processing	Signal transduction	NF-kappa B signaling pathway	interleukin 1 beta	K04519 IL1B; interleukin 1 beta	40.449	5.338	Yes (up-regulated)	8.05769e-74	interleukin 1 beta [Source:HGNC Symbol;Acc:HGNC:5992]	IL1B	P01584	ENSG00000125538
Environmental Information Processing	Signal transduction	TNF signaling pathway	interleukin 1 beta	K04519 IL1B; interleukin 1 beta	40.449	5.338	Yes (up-regulated)	8.05769e-74	interleukin 1 beta [Source:HGNC Symbol;Acc:HGNC:5992]	IL1B	P01584	ENSG00000125538
Environmental Information Processing	Signaling molecules and interaction	Cytokine-cytokine receptor interaction	interleukin 1 beta	K04519 IL1B; interleukin 1 beta	40.449	5.338	Yes (up-regulated)	8.05769e-74	interleukin 1 beta [Source:HGNC Symbol;Acc:HGNC:5992]	IL1B	P01584	ENSG00000125538
Organismal Systems	Development and regeneration	Osteoclast differentiation	interleukin 1 beta	K04519 IL1B; interleukin 1 beta	40.449	5.338	Yes (up-regulated)	8.05769e-74	interleukin 1 beta [Source:HGNC Symbol;Acc:HGNC:5992]	IL1B	P01584	ENSG00000125538
Organismal Systems	Immune system	C-type lectin receptor signaling pathway	interleukin 1 beta	K04519 IL1B; interleukin 1 beta	40.449	5.338	Yes (up-regulated)	8.05769e-74	interleukin 1 beta [Source:HGNC Symbol;Acc:HGNC:5992]	IL1B	P01584	ENSG00000125538
Organismal Systems	Immune system	Cytosolic DNA-sensing pathway	interleukin 1 beta	K04519 IL1B; interleukin 1 beta	40.449	5.338	Yes (up-regulated)	8.05769e-74	interleukin 1 beta [Source:HGNC Symbol;Acc:HGNC:5992]	IL1B	P01584	ENSG00000125538
Organismal Systems	Immune system	Hematopoietic cell lineage	interleukin 1 beta	K04519 IL1B; interleukin 1 beta	40.449	5.338	Yes (up-regulated)	8.05769e-74	interleukin 1 beta [Source:HGNC Symbol;Acc:HGNC:5992]	IL1B	P01584	ENSG00000125538
Organismal Systems	Immune system	IL-17 signaling pathway	interleukin 1 beta	K04519 IL1B; interleukin 1 beta	40.449	5.338	Yes (up-regulated)	8.05769e-74	interleukin 1 beta [Source:HGNC Symbol;Acc:HGNC:5992]	IL1B	P01584	ENSG00000125538
Organismal Systems	Immune system	NOD-like receptor signaling pathway	interleukin 1 beta	K04519 IL1B; interleukin 1 beta	40.449	5.338	Yes (up-regulated)	8.05769e-74	interleukin 1 beta [Source:HGNC Symbol;Acc:HGNC:5992]	IL1B	P01584	ENSG00000125538
Organismal Systems	Immune system	Th17 cell differentiation	interleukin 1 beta	K04519 IL1B; interleukin 1 beta	40.449	5.338	Yes (up-regulated)	8.05769e-74	interleukin 1 beta [Source:HGNC Symbol;Acc:HGNC:5992]	IL1B	P01584	ENSG00000125538
Organismal Systems	Immune system	Toll-like receptor signaling pathway	interleukin 1 beta	K04519 IL1B; interleukin 1 beta	40.449	5.338	Yes (up-regulated)	8.05769e-74	interleukin 1 beta [Source:HGNC Symbol;Acc:HGNC:5992]	IL1B	P01584	ENSG00000125538
Organismal Systems	Sensory system	Inflammatory mediator regulation of TRP channels	interleukin 1 beta	K04519 IL1B; interleukin 1 beta	40.449	5.338	Yes (up-regulated)	8.05769e-74	interleukin 1 beta [Source:HGNC Symbol;Acc:HGNC:5992]	IL1B	P01584	ENSG00000125538
Environmental Information Processing	Signal transduction	NF-kappa B signaling pathway	C-X-C motif chemokine ligand 1	K05505 CXCL1_2_3; C-X-C motif chemokine 1/2/3	32.353	5.016	Yes (up-regulated)	0.00104328	chemokine (C-X-C motif) ligand 1 (melanoma growth stimulating activity, alpha) [Source:HGNC Symbol;Acc:HGNC:4602]	CXCL1	P09341	ENSG00000163739
Environmental Information Processing	Signal transduction	TNF signaling pathway	C-X-C motif chemokine ligand 1	K05505 CXCL1_2_3; C-X-C motif chemokine 1/2/3	32.353	5.016	Yes (up-regulated)	0.00104328	chemokine (C-X-C motif) ligand 1 (melanoma growth stimulating activity, alpha) [Source:HGNC Symbol;Acc:HGNC:4602]	CXCL1	P09341	ENSG00000163739
Environmental Information Processing	Signaling molecules and interaction	Cytokine-cytokine receptor interaction	C-X-C motif chemokine ligand 1	K05505 CXCL1_2_3; C-X-C motif chemokine 1/2/3	32.353	5.016	Yes (up-regulated)	0.00104328	chemokine (C-X-C motif) ligand 1 (melanoma growth stimulating activity, alpha) [Source:HGNC Symbol;Acc:HGNC:4602]	CXCL1	P09341	ENSG00000163739
Environmental Information Processing	Signaling molecules and interaction	Viral protein interaction with cytokine and cytokine receptor	C-X-C motif chemokine ligand 1	K05505 CXCL1_2_3; C-X-C motif chemokine 1/2/3	32.353	5.016	Yes (up-regulated)	0.00104328	chemokine (C-X-C motif) ligand 1 (melanoma growth stimulating activity, alpha) [Source:HGNC Symbol;Acc:HGNC:4602]	CXCL1	P09341	ENSG00000163739
Organismal Systems	Immune system	Chemokine signaling pathway	C-X-C motif chemokine ligand 1	K05505 CXCL1_2_3; C-X-C motif chemokine 1/2/3	32.353	5.016	Yes (up-regulated)	0.00104328	chemokine (C-X-C motif) ligand 1 (melanoma growth stimulating activity, alpha) [Source:HGNC Symbol;Acc:HGNC:4602]	CXCL1	P09341	ENSG00000163739
Organismal Systems	Immune system	IL-17 signaling pathway	C-X-C motif chemokine ligand 1	K05505 CXCL1_2_3; C-X-C motif chemokine 1/2/3	32.353	5.016	Yes (up-regulated)	0.00104328	chemokine (C-X-C motif) ligand 1 (melanoma growth stimulating activity, alpha) [Source:HGNC Symbol;Acc:HGNC:4602]	CXCL1	P09341	ENSG00000163739
Organismal Systems	Immune system	NOD-like receptor signaling pathway	C-X-C motif chemokine ligand 1	K05505 CXCL1_2_3; C-X-C motif chemokine 1/2/3	32.353	5.016	Yes (up-regulated)	0.00104328	chemokine (C-X-C motif) ligand 1 (melanoma growth stimulating activity, alpha) [Source:HGNC Symbol;Acc:HGNC:4602]	CXCL1	P09341	ENSG00000163739
Organismal Systems	Immune system	Complement and coagulation cascades	complement component 4 binding protein alpha	K04002 C4BPA; complement component 4 binding protein alpha	26.611	4.734	Yes (up-regulated)	9.37167e-08	complement component 4 binding protein, alpha [Source:HGNC Symbol;Acc:HGNC:1325]	C4BPA	P04003	ENSG00000123838
Environmental Information Processing	Signal transduction	NF-kappa B signaling pathway	vascular cell adhesion molecule 1	K06527 VCAM1; vascular cell adhesion molecule 1	25.685	4.683	Yes (up-regulated)	5.01989e-12	vascular cell adhesion molecule 1 [Source:HGNC Symbol;Acc:HGNC:12663]	VCAM1	P19320	ENSG00000162692
Environmental Information Processing	Signal transduction	TNF signaling pathway	vascular cell adhesion molecule 1	K06527 VCAM1; vascular cell adhesion molecule 1	25.685	4.683	Yes (up-regulated)	5.01989e-12	vascular cell adhesion molecule 1 [Source:HGNC Symbol;Acc:HGNC:12663]	VCAM1	P19320	ENSG00000162692
Environmental Information Processing	Signaling molecules and interaction	Cell adhesion molecules	vascular cell adhesion molecule 1	K06527 VCAM1; vascular cell adhesion molecule 1	25.685	4.683	Yes (up-regulated)	5.01989e-12	vascular cell adhesion molecule 1 [Source:HGNC Symbol;Acc:HGNC:12663]	VCAM1	P19320	ENSG00000162692
Organismal Systems	Immune system	Leukocyte transendothelial migration	vascular cell adhesion molecule 1	K06527 VCAM1; vascular cell adhesion molecule 1	25.685	4.683	Yes (up-regulated)	5.01989e-12	vascular cell adhesion molecule 1 [Source:HGNC Symbol;Acc:HGNC:12663]	VCAM1	P19320	ENSG00000162692
Organismal Systems	Immune system	Antigen processing and presentation	CD74 molecule	K06505 CD74; CD74 antigen	25.498	4.672	Yes (up-regulated)	1.56665e-09	CD74 molecule, major histocompatibility complex, class II invariant chain [Source:HGNC Symbol;Acc:HGNC:1697]	CD74	P04233	ENSG00000019582
Not Included in Pathway or Brite	Unclassified: metabolism	Energy metabolism	cytochrome b5 type A	K23490 CYB5; cytochrome b5	24.606	4.621	Yes (up-regulated)	7.44925e-05	cytochrome b5 type A (microsomal) [Source:HGNC Symbol;Acc:HGNC:2570]	CYB5A	P00167	ENSG00000166347
Cellular Processes	Cell growth and death	Apoptosis	TNF superfamily member 10	K04721 TNFSF10; tumor necrosis factor ligand superfamily member 10	22.343	4.482	Yes (up-regulated)	7.40271e-10	tumor necrosis factor superfamily member 10 [Source:HGNC Symbol;Acc:HGNC:11925]	TNFSF10	P50591	ENSG00000121858
Cellular Processes	Cell growth and death	Necroptosis	TNF superfamily member 10	K04721 TNFSF10; tumor necrosis factor ligand superfamily member 10	22.343	4.482	Yes (up-regulated)	7.40271e-10	tumor necrosis factor superfamily member 10 [Source:HGNC Symbol;Acc:HGNC:11925]	TNFSF10	P50591	ENSG00000121858
Environmental Information Processing	Signal transduction	FoxO signaling pathway	TNF superfamily member 10	K04721 TNFSF10; tumor necrosis factor ligand superfamily member 10	22.343	4.482	Yes (up-regulated)	7.40271e-10	tumor necrosis factor superfamily member 10 [Source:HGNC Symbol;Acc:HGNC:11925]	TNFSF10	P50591	ENSG00000121858
Environmental Information Processing	Signaling molecules and interaction	Cytokine-cytokine receptor interaction	TNF superfamily member 10	K04721 TNFSF10; tumor necrosis factor ligand superfamily member 10	22.343	4.482	Yes (up-regulated)	7.40271e-10	tumor necrosis factor superfamily member 10 [Source:HGNC Symbol;Acc:HGNC:11925]	TNFSF10	P50591	ENSG00000121858
Environmental Information Processing	Signaling molecules and interaction	Viral protein interaction with cytokine and cytokine receptor	TNF superfamily member 10	K04721 TNFSF10; tumor necrosis factor ligand superfamily member 10	22.343	4.482	Yes (up-regulated)	7.40271e-10	tumor necrosis factor superfamily member 10 [Source:HGNC Symbol;Acc:HGNC:11925]	TNFSF10	P50591	ENSG00000121858
Organismal Systems	Immune system	Natural killer cell mediated cytotoxicity	TNF superfamily member 10	K04721 TNFSF10; tumor necrosis factor ligand superfamily member 10	22.343	4.482	Yes (up-regulated)	7.40271e-10	tumor necrosis factor superfamily member 10 [Source:HGNC Symbol;Acc:HGNC:11925]	TNFSF10	P50591	ENSG00000121858
Cellular Processes	Cellular community - eukaryotes	Tight junction	claudin 1	K06087 CLDN; claudin	22.182	4.471	Yes (up-regulated)	9.89097e-11	claudin 1 [Source:HGNC Symbol;Acc:HGNC:2032]	CLDN1	O95832	ENSG00000163347
Environmental Information Processing	Signaling molecules and interaction	Cell adhesion molecules	claudin 1	K06087 CLDN; claudin	22.182	4.471	Yes (up-regulated)	9.89097e-11	claudin 1 [Source:HGNC Symbol;Acc:HGNC:2032]	CLDN1	O95832	ENSG00000163347
Organismal Systems	Immune system	Leukocyte transendothelial migration	claudin 1	K06087 CLDN; claudin	22.182	4.471	Yes (up-regulated)	9.89097e-11	claudin 1 [Source:HGNC Symbol;Acc:HGNC:2032]	CLDN1	O95832	ENSG00000163347
Environmental Information Processing	Signaling molecules and interaction	Cytokine-cytokine receptor interaction	C-C motif chemokine ligand 8	K16596 CCL8; C-C motif chemokine 8	21.901	4.453	Yes (up-regulated)	0.00104328	chemokine (C-C motif) ligand 8 [Source:HGNC Symbol;Acc:HGNC:10635]	CCL8	P80075	ENSG00000108700
Environmental Information Processing	Signaling molecules and interaction	Viral protein interaction with cytokine and cytokine receptor	C-C motif chemokine ligand 8	K16596 CCL8; C-C motif chemokine 8	21.901	4.453	Yes (up-regulated)	0.00104328	chemokine (C-C motif) ligand 8 [Source:HGNC Symbol;Acc:HGNC:10635]	CCL8	P80075	ENSG00000108700
Organismal Systems	Immune system	Chemokine signaling pathway	C-C motif chemokine ligand 8	K16596 CCL8; C-C motif chemokine 8	21.901	4.453	Yes (up-regulated)	0.00104328	chemokine (C-C motif) ligand 8 [Source:HGNC Symbol;Acc:HGNC:10635]	CCL8	P80075	ENSG00000108700
Environmental Information Processing	Signaling molecules and interaction	Cytokine-cytokine receptor interaction	C-X-C motif chemokine ligand 11	K12672 CXCL11; C-X-C motif chemokine 11	21.319	4.414	Yes (up-regulated)	2.15129e-06	chemokine (C-X-C motif) ligand 11 [Source:HGNC Symbol;Acc:HGNC:10638]	CXCL11	O14625	ENSG00000169248
Environmental Information Processing	Signaling molecules and interaction	Viral protein interaction with cytokine and cytokine receptor	C-X-C motif chemokine ligand 11	K12672 CXCL11; C-X-C motif chemokine 11	21.319	4.414	Yes (up-regulated)	2.15129e-06	chemokine (C-X-C motif) ligand 11 [Source:HGNC Symbol;Acc:HGNC:10638]	CXCL11	O14625	ENSG00000169248
Organismal Systems	Immune system	Chemokine signaling pathway	C-X-C motif chemokine ligand 11	K12672 CXCL11; C-X-C motif chemokine 11	21.319	4.414	Yes (up-regulated)	2.15129e-06	chemokine (C-X-C motif) ligand 11 [Source:HGNC Symbol;Acc:HGNC:10638]	CXCL11	O14625	ENSG00000169248
Organismal Systems	Immune system	Toll-like receptor signaling pathway	C-X-C motif chemokine ligand 11	K12672 CXCL11; C-X-C motif chemokine 11	21.319	4.414	Yes (up-regulated)	2.15129e-06	chemokine (C-X-C motif) ligand 11 [Source:HGNC Symbol;Acc:HGNC:10638]	CXCL11	O14625	ENSG00000169248
Environmental Information Processing	Signal transduction	Hippo signaling pathway	growth differentiation factor 5	K04664 GDF5; growth differentiation factor 5	20.68	4.37	Yes (up-regulated)	2.64969e-10	growth differentiation factor 5 [Source:HGNC Symbol;Acc:HGNC:4220]	GDF5	P43026	ENSG00000125965
Environmental Information Processing	Signal transduction	TGF-beta signaling pathway	growth differentiation factor 5	K04664 GDF5; growth differentiation factor 5	20.68	4.37	Yes (up-regulated)	2.64969e-10	growth differentiation factor 5 [Source:HGNC Symbol;Acc:HGNC:4220]	GDF5	P43026	ENSG00000125965
Environmental Information Processing	Signaling molecules and interaction	Cytokine-cytokine receptor interaction	growth differentiation factor 5	K04664 GDF5; growth differentiation factor 5	20.68	4.37	Yes (up-regulated)	2.64969e-10	growth differentiation factor 5 [Source:HGNC Symbol;Acc:HGNC:4220]	GDF5	P43026	ENSG00000125965
Metabolism	Amino acid metabolism	Tryptophan metabolism	kynureninase	K01556 KYNU; kynureninase [EC:3.7.1.3]	20.604	4.365	Yes (up-regulated)	7.68596e-07	kynureninase [Source:HGNC Symbol;Acc:HGNC:6469]	KYNU	Q16719	ENSG00000115919
Organismal Systems	Immune system	NOD-like receptor signaling pathway	guanylate binding protein 5	K20898 GBP5; guanylate-binding protein 5	20.136	4.332	Yes (up-regulated)	8.03675e-55	guanylate binding protein 5 [Source:HGNC Symbol;Acc:HGNC:19895]	GBP5	Q96PP8	ENSG00000154451
Environmental Information Processing	Signal transduction	Calcium signaling pathway	CD38 molecule	K01242 CD38; ADP-ribosyl cyclase 1 [EC:3.2.2.6 2.4.99.20]	18.88	4.239	Yes (up-regulated)	5.93844e-05	CD38 molecule [Source:HGNC Symbol;Acc:HGNC:1667]	CD38	P28907	ENSG00000004468
Metabolism	Metabolism of cofactors and vitamins	Nicotinate and nicotinamide metabolism	CD38 molecule	K01242 CD38; ADP-ribosyl cyclase 1 [EC:3.2.2.6 2.4.99.20]	18.88	4.239	Yes (up-regulated)	5.93844e-05	CD38 molecule [Source:HGNC Symbol;Acc:HGNC:1667]	CD38	P28907	ENSG00000004468
Organismal Systems	Digestive system	Pancreatic secretion	CD38 molecule	K01242 CD38; ADP-ribosyl cyclase 1 [EC:3.2.2.6 2.4.99.20]	18.88	4.239	Yes (up-regulated)	5.93844e-05	CD38 molecule [Source:HGNC Symbol;Acc:HGNC:1667]	CD38	P28907	ENSG00000004468
Organismal Systems	Digestive system	Salivary secretion	CD38 molecule	K01242 CD38; ADP-ribosyl cyclase 1 [EC:3.2.2.6 2.4.99.20]	18.88	4.239	Yes (up-regulated)	5.93844e-05	CD38 molecule [Source:HGNC Symbol;Acc:HGNC:1667]	CD38	P28907	ENSG00000004468
Organismal Systems	Endocrine system	Oxytocin signaling pathway	CD38 molecule	K01242 CD38; ADP-ribosyl cyclase 1 [EC:3.2.2.6 2.4.99.20]	18.88	4.239	Yes (up-regulated)	5.93844e-05	CD38 molecule [Source:HGNC Symbol;Acc:HGNC:1667]	CD38	P28907	ENSG00000004468
Organismal Systems	Immune system	Hematopoietic cell lineage	CD38 molecule	K01242 CD38; ADP-ribosyl cyclase 1 [EC:3.2.2.6 2.4.99.20]	18.88	4.239	Yes (up-regulated)	5.93844e-05	CD38 molecule [Source:HGNC Symbol;Acc:HGNC:1667]	CD38	P28907	ENSG00000004468
Cellular Processes	Transport and catabolism	Phagosome	major histocompatibility complex, class II, DR alpha	K06752 MHC2; MHC class II antigen	17.523	4.131	Yes (up-regulated)	2.37002e-09	major histocompatibility complex, class II, DR alpha [Source:HGNC Symbol;Acc:HGNC:4947]	HLA-DRA	P01903	ENSG00000227993
Environmental Information Processing	Signaling molecules and interaction	Cell adhesion molecules	major histocompatibility complex, class II, DR alpha	K06752 MHC2; MHC class II antigen	17.523	4.131	Yes (up-regulated)	2.37002e-09	major histocompatibility complex, class II, DR alpha [Source:HGNC Symbol;Acc:HGNC:4947]	HLA-DRA	P01903	ENSG00000227993
Organismal Systems	Immune system	Antigen processing and presentation	major histocompatibility complex, class II, DR alpha	K06752 MHC2; MHC class II antigen	17.523	4.131	Yes (up-regulated)	2.37002e-09	major histocompatibility complex, class II, DR alpha [Source:HGNC Symbol;Acc:HGNC:4947]	HLA-DRA	P01903	ENSG00000227993
Organismal Systems	Immune system	Hematopoietic cell lineage	major histocompatibility complex, class II, DR alpha	K06752 MHC2; MHC class II antigen	17.523	4.131	Yes (up-regulated)	2.37002e-09	major histocompatibility complex, class II, DR alpha [Source:HGNC Symbol;Acc:HGNC:4947]	HLA-DRA	P01903	ENSG00000227993
Organismal Systems	Immune system	Intestinal immune network for IgA production	major histocompatibility complex, class II, DR alpha	K06752 MHC2; MHC class II antigen	17.523	4.131	Yes (up-regulated)	2.37002e-09	major histocompatibility complex, class II, DR alpha [Source:HGNC Symbol;Acc:HGNC:4947]	HLA-DRA	P01903	ENSG00000227993
Organismal Systems	Immune system	Th1 and Th2 cell differentiation	major histocompatibility complex, class II, DR alpha	K06752 MHC2; MHC class II antigen	17.523	4.131	Yes (up-regulated)	2.37002e-09	major histocompatibility complex, class II, DR alpha [Source:HGNC Symbol;Acc:HGNC:4947]	HLA-DRA	P01903	ENSG00000227993
Organismal Systems	Immune system	Th17 cell differentiation	major histocompatibility complex, class II, DR alpha	K06752 MHC2; MHC class II antigen	17.523	4.131	Yes (up-regulated)	2.37002e-09	major histocompatibility complex, class II, DR alpha [Source:HGNC Symbol;Acc:HGNC:4947]	HLA-DRA	P01903	ENSG00000227993
Metabolism	Metabolism of cofactors and vitamins	Thiamine metabolism	adenylate kinase 7	K00939 adk; adenylate kinase [EC:2.7.4.3]	17.042	4.091	Yes (up-regulated)	0.000122296	adenylate kinase 7 [Source:HGNC Symbol;Acc:HGNC:20091]	AK7	Q96M32	ENSG00000140057
Metabolism	Nucleotide metabolism	Purine metabolism	adenylate kinase 7	K00939 adk; adenylate kinase [EC:2.7.4.3]	17.042	4.091	Yes (up-regulated)	0.000122296	adenylate kinase 7 [Source:HGNC Symbol;Acc:HGNC:20091]	AK7	Q96M32	ENSG00000140057
Environmental Information Processing	Signaling molecules and interaction	Cytokine-cytokine receptor interaction	interleukin 32	K22632 IL32; interleukin 32	16.832	4.073	Yes (up-regulated)	5.00298e-39	interleukin 32 [Source:HGNC Symbol;Acc:HGNC:16830]	IL32	P24001	ENSG00000008517
Environmental Information Processing	Signal transduction	TNF signaling pathway	C-X-C motif chemokine ligand 5	K05506 CXCL5_6; C-X-C motif chemokine 5/6	16.01	4.001	Yes (up-regulated)	2.06567e-17	chemokine (C-X-C motif) ligand 5 [Source:HGNC Symbol;Acc:HGNC:10642]	CXCL5	P42830	ENSG00000163735
Environmental Information Processing	Signaling molecules and interaction	Cytokine-cytokine receptor interaction	C-X-C motif chemokine ligand 5	K05506 CXCL5_6; C-X-C motif chemokine 5/6	16.01	4.001	Yes (up-regulated)	2.06567e-17	chemokine (C-X-C motif) ligand 5 [Source:HGNC Symbol;Acc:HGNC:10642]	CXCL5	P42830	ENSG00000163735
Environmental Information Processing	Signaling molecules and interaction	Viral protein interaction with cytokine and cytokine receptor	C-X-C motif chemokine ligand 5	K05506 CXCL5_6; C-X-C motif chemokine 5/6	16.01	4.001	Yes (up-regulated)	2.06567e-17	chemokine (C-X-C motif) ligand 5 [Source:HGNC Symbol;Acc:HGNC:10642]	CXCL5	P42830	ENSG00000163735
Organismal Systems	Immune system	Chemokine signaling pathway	C-X-C motif chemokine ligand 5	K05506 CXCL5_6; C-X-C motif chemokine 5/6	16.01	4.001	Yes (up-regulated)	2.06567e-17	chemokine (C-X-C motif) ligand 5 [Source:HGNC Symbol;Acc:HGNC:10642]	CXCL5	P42830	ENSG00000163735
Organismal Systems	Immune system	IL-17 signaling pathway	C-X-C motif chemokine ligand 5	K05506 CXCL5_6; C-X-C motif chemokine 5/6	16.01	4.001	Yes (up-regulated)	2.06567e-17	chemokine (C-X-C motif) ligand 5 [Source:HGNC Symbol;Acc:HGNC:10642]	CXCL5	P42830	ENSG00000163735
Environmental Information Processing	Signal transduction	Apelin signaling pathway	plasminogen activator, tissue type	K01343 PLAT; tissue plasminogen activator [EC:3.4.21.68]	15.7	3.973	Yes (up-regulated)	1.91466e-69	plasminogen activator, tissue [Source:HGNC Symbol;Acc:HGNC:9051]	PLAT	P00750	ENSG00000104368
Organismal Systems	Immune system	Complement and coagulation cascades	plasminogen activator, tissue type	K01343 PLAT; tissue plasminogen activator [EC:3.4.21.68]	15.7	3.973	Yes (up-regulated)	1.91466e-69	plasminogen activator, tissue [Source:HGNC Symbol;Acc:HGNC:9051]	PLAT	P00750	ENSG00000104368
Metabolism	Energy metabolism	Nitrogen metabolism	carbonic anhydrase 12	K01672 CA; carbonic anhydrase [EC:4.2.1.1]	15.668	3.97	Yes (up-regulated)	8.56133e-35	carbonic anhydrase XII [Source:HGNC Symbol;Acc:HGNC:1371]	CA12	O43570	ENSG00000074410
Environmental Information Processing	Signal transduction	TNF signaling pathway	C-C motif chemokine ligand 2	K14624 CCL2; C-C motif chemokine 2	15.548	3.959	Yes (up-regulated)	2.44386e-47	chemokine (C-C motif) ligand 2 [Source:HGNC Symbol;Acc:HGNC:10618]	CCL2	P13500	ENSG00000108691
Environmental Information Processing	Signaling molecules and interaction	Cytokine-cytokine receptor interaction	C-C motif chemokine ligand 2	K14624 CCL2; C-C motif chemokine 2	15.548	3.959	Yes (up-regulated)	2.44386e-47	chemokine (C-C motif) ligand 2 [Source:HGNC Symbol;Acc:HGNC:10618]	CCL2	P13500	ENSG00000108691
Environmental Information Processing	Signaling molecules and interaction	Viral protein interaction with cytokine and cytokine receptor	C-C motif chemokine ligand 2	K14624 CCL2; C-C motif chemokine 2	15.548	3.959	Yes (up-regulated)	2.44386e-47	chemokine (C-C motif) ligand 2 [Source:HGNC Symbol;Acc:HGNC:10618]	CCL2	P13500	ENSG00000108691
Organismal Systems	Immune system	Chemokine signaling pathway	C-C motif chemokine ligand 2	K14624 CCL2; C-C motif chemokine 2	15.548	3.959	Yes (up-regulated)	2.44386e-47	chemokine (C-C motif) ligand 2 [Source:HGNC Symbol;Acc:HGNC:10618]	CCL2	P13500	ENSG00000108691
Organismal Systems	Immune system	IL-17 signaling pathway	C-C motif chemokine ligand 2	K14624 CCL2; C-C motif chemokine 2	15.548	3.959	Yes (up-regulated)	2.44386e-47	chemokine (C-C motif) ligand 2 [Source:HGNC Symbol;Acc:HGNC:10618]	CCL2	P13500	ENSG00000108691
Organismal Systems	Immune system	NOD-like receptor signaling pathway	C-C motif chemokine ligand 2	K14624 CCL2; C-C motif chemokine 2	15.548	3.959	Yes (up-regulated)	2.44386e-47	chemokine (C-C motif) ligand 2 [Source:HGNC Symbol;Acc:HGNC:10618]	CCL2	P13500	ENSG00000108691
Environmental Information Processing	Membrane transport	ABC transporters	ATP binding cassette subfamily A member 13	K05647 ABCA13; ATP binding cassette, subfamily A (ABC1), member 13	15.031	3.91	Yes (up-regulated)	6.88431e-08	ATP binding cassette subfamily A member 13 [Source:HGNC Symbol;Acc:HGNC:14638]	ABCA13	Q86UQ4	ENSG00000179869
Cellular Processes	Cell growth and death	Cellular senescence	interleukin 1 alpha	K04383 IL1A; interleukin 1 alpha	14.745	3.882	Yes (up-regulated)	6.42656e-13	interleukin 1 alpha [Source:HGNC Symbol;Acc:HGNC:5991]	IL1A	P01583	ENSG00000115008
Cellular Processes	Cell growth and death	Necroptosis	interleukin 1 alpha	K04383 IL1A; interleukin 1 alpha	14.745	3.882	Yes (up-regulated)	6.42656e-13	interleukin 1 alpha [Source:HGNC Symbol;Acc:HGNC:5991]	IL1A	P01583	ENSG00000115008
Environmental Information Processing	Signal transduction	MAPK signaling pathway	interleukin 1 alpha	K04383 IL1A; interleukin 1 alpha	14.745	3.882	Yes (up-regulated)	6.42656e-13	interleukin 1 alpha [Source:HGNC Symbol;Acc:HGNC:5991]	IL1A	P01583	ENSG00000115008
Environmental Information Processing	Signaling molecules and interaction	Cytokine-cytokine receptor interaction	interleukin 1 alpha	K04383 IL1A; interleukin 1 alpha	14.745	3.882	Yes (up-regulated)	6.42656e-13	interleukin 1 alpha [Source:HGNC Symbol;Acc:HGNC:5991]	IL1A	P01583	ENSG00000115008
Metabolism	Metabolism of cofactors and vitamins	Folate biosynthesis	GTP cyclohydrolase 1	K01495 GCH1; GTP cyclohydrolase IA [EC:3.5.4.16]	14.748	3.882	Yes (up-regulated)	3.15865e-23	GTP cyclohydrolase 1 [Source:HGNC Symbol;Acc:HGNC:4193]	GCH1	P30793	ENSG00000131979
Organismal Systems	Development and regeneration	Osteoclast differentiation	interleukin 1 alpha	K04383 IL1A; interleukin 1 alpha	14.745	3.882	Yes (up-regulated)	6.42656e-13	interleukin 1 alpha [Source:HGNC Symbol;Acc:HGNC:5991]	IL1A	P01583	ENSG00000115008
Organismal Systems	Immune system	Hematopoietic cell lineage	interleukin 1 alpha	K04383 IL1A; interleukin 1 alpha	14.745	3.882	Yes (up-regulated)	6.42656e-13	interleukin 1 alpha [Source:HGNC Symbol;Acc:HGNC:5991]	IL1A	P01583	ENSG00000115008
Environmental Information Processing	Signal transduction	ErbB signaling pathway	epiregulin	K09784 EREG; epiregulin	14.624	3.87	Yes (up-regulated)	3.85937e-05	epiregulin [Source:HGNC Symbol;Acc:HGNC:3443]	EREG	O14944	ENSG00000124882
Environmental Information Processing	Signal transduction	MAPK signaling pathway	epiregulin	K09784 EREG; epiregulin	14.624	3.87	Yes (up-regulated)	3.85937e-05	epiregulin [Source:HGNC Symbol;Acc:HGNC:3443]	EREG	O14944	ENSG00000124882
Environmental Information Processing	Signal transduction	PI3K-Akt signaling pathway	epiregulin	K09784 EREG; epiregulin	14.624	3.87	Yes (up-regulated)	3.85937e-05	epiregulin [Source:HGNC Symbol;Acc:HGNC:3443]	EREG	O14944	ENSG00000124882
Environmental Information Processing	Signal transduction	NF-kappa B signaling pathway	C-C motif chemokine ligand 13	K16595 CCL13; C-C motif chemokine 13	14.615	3.869	Yes (up-regulated)	4.82573e-05	chemokine (C-C motif) ligand 13 [Source:HGNC Symbol;Acc:HGNC:10611]	CCL13	Q99616	ENSG00000181374
Environmental Information Processing	Signaling molecules and interaction	Cytokine-cytokine receptor interaction	C-C motif chemokine ligand 13	K16595 CCL13; C-C motif chemokine 13	14.615	3.869	Yes (up-regulated)	4.82573e-05	chemokine (C-C motif) ligand 13 [Source:HGNC Symbol;Acc:HGNC:10611]	CCL13	Q99616	ENSG00000181374
Environmental Information Processing	Signaling molecules and interaction	Viral protein interaction with cytokine and cytokine receptor	C-C motif chemokine ligand 13	K16595 CCL13; C-C motif chemokine 13	14.615	3.869	Yes (up-regulated)	4.82573e-05	chemokine (C-C motif) ligand 13 [Source:HGNC Symbol;Acc:HGNC:10611]	CCL13	Q99616	ENSG00000181374
Organismal Systems	Immune system	Chemokine signaling pathway	C-C motif chemokine ligand 13	K16595 CCL13; C-C motif chemokine 13	14.615	3.869	Yes (up-regulated)	4.82573e-05	chemokine (C-C motif) ligand 13 [Source:HGNC Symbol;Acc:HGNC:10611]	CCL13	Q99616	ENSG00000181374
Cellular Processes	Transport and catabolism	Phagosome	toll like receptor 2	K10159 TLR2; toll-like receptor 2	14.525	3.86	Yes (up-regulated)	1.12739e-25	toll-like receptor 2 [Source:HGNC Symbol;Acc:HGNC:11848]	TLR2	O60603	ENSG00000137462
Environmental Information Processing	Signal transduction	PI3K-Akt signaling pathway	toll like receptor 2	K10159 TLR2; toll-like receptor 2	14.525	3.86	Yes (up-regulated)	1.12739e-25	toll-like receptor 2 [Source:HGNC Symbol;Acc:HGNC:11848]	TLR2	O60603	ENSG00000137462
Organismal Systems	Immune system	Neutrophil extracellular trap formation	toll like receptor 2	K10159 TLR2; toll-like receptor 2	14.525	3.86	Yes (up-regulated)	1.12739e-25	toll-like receptor 2 [Source:HGNC Symbol;Acc:HGNC:11848]	TLR2	O60603	ENSG00000137462
Organismal Systems	Immune system	Toll-like receptor signaling pathway	toll like receptor 2	K10159 TLR2; toll-like receptor 2	14.525	3.86	Yes (up-regulated)	1.12739e-25	toll-like receptor 2 [Source:HGNC Symbol;Acc:HGNC:11848]	TLR2	O60603	ENSG00000137462
Cellular Processes	Transport and catabolism	Peroxisome	superoxide dismutase 2	K04564 SOD2; superoxide dismutase, Fe-Mn family [EC:1.15.1.1]	14.238	3.832	Yes (up-regulated)	3.16796e-23	superoxide dismutase 2, mitochondrial [Source:HGNC Symbol;Acc:HGNC:11180]	SOD2	P04179	ENSG00000112096
Environmental Information Processing	Signal transduction	FoxO signaling pathway	superoxide dismutase 2	K04564 SOD2; superoxide dismutase, Fe-Mn family [EC:1.15.1.1]	14.238	3.832	Yes (up-regulated)	3.16796e-23	superoxide dismutase 2, mitochondrial [Source:HGNC Symbol;Acc:HGNC:11180]	SOD2	P04179	ENSG00000112096
Organismal Systems	Aging	Longevity regulating pathway	superoxide dismutase 2	K04564 SOD2; superoxide dismutase, Fe-Mn family [EC:1.15.1.1]	14.238	3.832	Yes (up-regulated)	3.16796e-23	superoxide dismutase 2, mitochondrial [Source:HGNC Symbol;Acc:HGNC:11180]	SOD2	P04179	ENSG00000112096
Organismal Systems	Aging	Longevity regulating pathway - multiple species	superoxide dismutase 2	K04564 SOD2; superoxide dismutase, Fe-Mn family [EC:1.15.1.1]	14.238	3.832	Yes (up-regulated)	3.16796e-23	superoxide dismutase 2, mitochondrial [Source:HGNC Symbol;Acc:HGNC:11180]	SOD2	P04179	ENSG00000112096
Environmental Information Processing	Signaling molecules and interaction	Cytokine-cytokine receptor interaction	Epstein-Barr virus induced 3	K24476 EBI3; interleukin 27 subunit beta	13.946	3.802	Yes (up-regulated)	2.31187e-05	Epstein-Barr virus induced 3 [Source:HGNC Symbol;Acc:HGNC:3129]	EBI3	Q14213	ENSG00000105246
Environmental Information Processing	Signal transduction	NF-kappa B signaling pathway	C-X-C motif chemokine ligand 2	K05505 CXCL1_2_3; C-X-C motif chemokine 1/2/3	13.711	3.777	Yes (up-regulated)	3.5876e-20	chemokine (C-X-C motif) ligand 2 [Source:HGNC Symbol;Acc:HGNC:4603]	CXCL2	P19875	ENSG00000081041
Environmental Information Processing	Signal transduction	TNF signaling pathway	C-X-C motif chemokine ligand 2	K05505 CXCL1_2_3; C-X-C motif chemokine 1/2/3	13.711	3.777	Yes (up-regulated)	3.5876e-20	chemokine (C-X-C motif) ligand 2 [Source:HGNC Symbol;Acc:HGNC:4603]	CXCL2	P19875	ENSG00000081041
Environmental Information Processing	Signaling molecules and interaction	Cytokine-cytokine receptor interaction	C-X-C motif chemokine ligand 2	K05505 CXCL1_2_3; C-X-C motif chemokine 1/2/3	13.711	3.777	Yes (up-regulated)	3.5876e-20	chemokine (C-X-C motif) ligand 2 [Source:HGNC Symbol;Acc:HGNC:4603]	CXCL2	P19875	ENSG00000081041
Environmental Information Processing	Signaling molecules and interaction	Viral protein interaction with cytokine and cytokine receptor	C-X-C motif chemokine ligand 2	K05505 CXCL1_2_3; C-X-C motif chemokine 1/2/3	13.711	3.777	Yes (up-regulated)	3.5876e-20	chemokine (C-X-C motif) ligand 2 [Source:HGNC Symbol;Acc:HGNC:4603]	CXCL2	P19875	ENSG00000081041
Organismal Systems	Immune system	Chemokine signaling pathway	C-X-C motif chemokine ligand 2	K05505 CXCL1_2_3; C-X-C motif chemokine 1/2/3	13.711	3.777	Yes (up-regulated)	3.5876e-20	chemokine (C-X-C motif) ligand 2 [Source:HGNC Symbol;Acc:HGNC:4603]	CXCL2	P19875	ENSG00000081041
Organismal Systems	Immune system	IL-17 signaling pathway	C-X-C motif chemokine ligand 2	K05505 CXCL1_2_3; C-X-C motif chemokine 1/2/3	13.711	3.777	Yes (up-regulated)	3.5876e-20	chemokine (C-X-C motif) ligand 2 [Source:HGNC Symbol;Acc:HGNC:4603]	CXCL2	P19875	ENSG00000081041
Organismal Systems	Immune system	NOD-like receptor signaling pathway	C-X-C motif chemokine ligand 2	K05505 CXCL1_2_3; C-X-C motif chemokine 1/2/3	13.711	3.777	Yes (up-regulated)	3.5876e-20	chemokine (C-X-C motif) ligand 2 [Source:HGNC Symbol;Acc:HGNC:4603]	CXCL2	P19875	ENSG00000081041
Organismal Systems	Digestive system	Salivary secretion	cystatin SN	K13897 CST1; cystatin-SN	13.555	3.761	Yes (up-regulated)	0.000518891	cystatin SN [Source:HGNC Symbol;Acc:HGNC:2473]	CST1	P01037	ENSG00000170373
Environmental Information Processing	Signaling molecules and interaction	Neuroactive ligand-receptor interaction	prostaglandin I2 receptor	K04263 PTGIR; prostacyclin receptor	13.458	3.75	Yes (up-regulated)	1.19841e-10	prostaglandin I2 (prostacyclin) receptor (IP) [Source:HGNC Symbol;Acc:HGNC:9602]	PTGIR	P43119	ENSG00000160013
Organismal Systems	Circulatory system	Vascular smooth muscle contraction	prostaglandin I2 receptor	K04263 PTGIR; prostacyclin receptor	13.458	3.75	Yes (up-regulated)	1.19841e-10	prostaglandin I2 (prostacyclin) receptor (IP) [Source:HGNC Symbol;Acc:HGNC:9602]	PTGIR	P43119	ENSG00000160013
Organismal Systems	Immune system	Platelet activation	prostaglandin I2 receptor	K04263 PTGIR; prostacyclin receptor	13.458	3.75	Yes (up-regulated)	1.19841e-10	prostaglandin I2 (prostacyclin) receptor (IP) [Source:HGNC Symbol;Acc:HGNC:9602]	PTGIR	P43119	ENSG00000160013
Environmental Information Processing	Signal transduction	cAMP signaling pathway	hydroxycarboxylic acid receptor 2	K08402 HCAR2_3; hydroxycarboxylic acid receptor 2/3	13.216	3.724	Yes (up-regulated)	5.33647e-07	hydroxycarboxylic acid receptor 2 [Source:HGNC Symbol;Acc:HGNC:24827]	HCAR2	Q8TDS4	ENSG00000182782
Cellular Processes	Cell growth and death	Cellular senescence	insulin like growth factor binding protein 3	K10138 IGFBP3; insulin-like growth factor-binding protein 3	12.974	3.698	Yes (up-regulated)	9.28214e-33	insulin like growth factor binding protein 3 [Source:HGNC Symbol;Acc:HGNC:5472]	IGFBP3	P17936	ENSG00000146674
Cellular Processes	Cell growth and death	p53 signaling pathway	insulin like growth factor binding protein 3	K10138 IGFBP3; insulin-like growth factor-binding protein 3	12.974	3.698	Yes (up-regulated)	9.28214e-33	insulin like growth factor binding protein 3 [Source:HGNC Symbol;Acc:HGNC:5472]	IGFBP3	P17936	ENSG00000146674
Organismal Systems	Endocrine system	Growth hormone synthesis, secretion and action	insulin like growth factor binding protein 3	K10138 IGFBP3; insulin-like growth factor-binding protein 3	12.974	3.698	Yes (up-regulated)	9.28214e-33	insulin like growth factor binding protein 3 [Source:HGNC Symbol;Acc:HGNC:5472]	IGFBP3	P17936	ENSG00000146674
Metabolism	Amino acid metabolism	Alanine, aspartate and glutamate metabolism	interleukin 4 induced 1	K03334 IL4I1; L-amino-acid oxidase [EC:1.4.3.2]	12.601	3.655	Yes (up-regulated)	3.80576e-32	interleukin 4 induced 1 [Source:HGNC Symbol;Acc:HGNC:19094]	IL4I1	Q96RQ9	ENSG00000104951
Metabolism	Amino acid metabolism	Cysteine and methionine metabolism	interleukin 4 induced 1	K03334 IL4I1; L-amino-acid oxidase [EC:1.4.3.2]	12.601	3.655	Yes (up-regulated)	3.80576e-32	interleukin 4 induced 1 [Source:HGNC Symbol;Acc:HGNC:19094]	IL4I1	Q96RQ9	ENSG00000104951
Metabolism	Amino acid metabolism	Phenylalanine metabolism	interleukin 4 induced 1	K03334 IL4I1; L-amino-acid oxidase [EC:1.4.3.2]	12.601	3.655	Yes (up-regulated)	3.80576e-32	interleukin 4 induced 1 [Source:HGNC Symbol;Acc:HGNC:19094]	IL4I1	Q96RQ9	ENSG00000104951
Metabolism	Amino acid metabolism	Phenylalanine, tyrosine and tryptophan biosynthesis	interleukin 4 induced 1	K03334 IL4I1; L-amino-acid oxidase [EC:1.4.3.2]	12.601	3.655	Yes (up-regulated)	3.80576e-32	interleukin 4 induced 1 [Source:HGNC Symbol;Acc:HGNC:19094]	IL4I1	Q96RQ9	ENSG00000104951
Metabolism	Amino acid metabolism	Tryptophan metabolism	interleukin 4 induced 1	K03334 IL4I1; L-amino-acid oxidase [EC:1.4.3.2]	12.601	3.655	Yes (up-regulated)	3.80576e-32	interleukin 4 induced 1 [Source:HGNC Symbol;Acc:HGNC:19094]	IL4I1	Q96RQ9	ENSG00000104951
Metabolism	Amino acid metabolism	Tyrosine metabolism	interleukin 4 induced 1	K03334 IL4I1; L-amino-acid oxidase [EC:1.4.3.2]	12.601	3.655	Yes (up-regulated)	3.80576e-32	interleukin 4 induced 1 [Source:HGNC Symbol;Acc:HGNC:19094]	IL4I1	Q96RQ9	ENSG00000104951
Metabolism	Amino acid metabolism	Valine, leucine and isoleucine degradation	interleukin 4 induced 1	K03334 IL4I1; L-amino-acid oxidase [EC:1.4.3.2]	12.601	3.655	Yes (up-regulated)	3.80576e-32	interleukin 4 induced 1 [Source:HGNC Symbol;Acc:HGNC:19094]	IL4I1	Q96RQ9	ENSG00000104951
Cellular Processes	Cell growth and death	Ferroptosis	solute carrier family 39 member 8	K14714 SLC39A8; solute carrier family 39 (zinc transporter), member 8	12.424	3.635	Yes (up-regulated)	9.73191e-76	solute carrier family 39 (zinc transporter), member 8 [Source:HGNC Symbol;Acc:HGNC:20862]	SLC39A8	Q9C0K1	ENSG00000138821
Environmental Information Processing	Signal transduction	NF-kappa B signaling pathway	C-X-C motif chemokine ligand 3	K05505 CXCL1_2_3; C-X-C motif chemokine 1/2/3	12.366	3.628	Yes (up-regulated)	1.97816e-06	chemokine (C-X-C motif) ligand 3 [Source:HGNC Symbol;Acc:HGNC:4604]	CXCL3	P19876	ENSG00000163734
Environmental Information Processing	Signal transduction	TNF signaling pathway	C-X-C motif chemokine ligand 3	K05505 CXCL1_2_3; C-X-C motif chemokine 1/2/3	12.366	3.628	Yes (up-regulated)	1.97816e-06	chemokine (C-X-C motif) ligand 3 [Source:HGNC Symbol;Acc:HGNC:4604]	CXCL3	P19876	ENSG00000163734
Environmental Information Processing	Signaling molecules and interaction	Cytokine-cytokine receptor interaction	C-X-C motif chemokine ligand 3	K05505 CXCL1_2_3; C-X-C motif chemokine 1/2/3	12.366	3.628	Yes (up-regulated)	1.97816e-06	chemokine (C-X-C motif) ligand 3 [Source:HGNC Symbol;Acc:HGNC:4604]	CXCL3	P19876	ENSG00000163734
Environmental Information Processing	Signaling molecules and interaction	Viral protein interaction with cytokine and cytokine receptor	C-X-C motif chemokine ligand 3	K05505 CXCL1_2_3; C-X-C motif chemokine 1/2/3	12.366	3.628	Yes (up-regulated)	1.97816e-06	chemokine (C-X-C motif) ligand 3 [Source:HGNC Symbol;Acc:HGNC:4604]	CXCL3	P19876	ENSG00000163734
Organismal Systems	Immune system	Chemokine signaling pathway	C-X-C motif chemokine ligand 3	K05505 CXCL1_2_3; C-X-C motif chemokine 1/2/3	12.366	3.628	Yes (up-regulated)	1.97816e-06	chemokine (C-X-C motif) ligand 3 [Source:HGNC Symbol;Acc:HGNC:4604]	CXCL3	P19876	ENSG00000163734
Organismal Systems	Immune system	IL-17 signaling pathway	C-X-C motif chemokine ligand 3	K05505 CXCL1_2_3; C-X-C motif chemokine 1/2/3	12.366	3.628	Yes (up-regulated)	1.97816e-06	chemokine (C-X-C motif) ligand 3 [Source:HGNC Symbol;Acc:HGNC:4604]	CXCL3	P19876	ENSG00000163734
Organismal Systems	Immune system	NOD-like receptor signaling pathway	C-X-C motif chemokine ligand 3	K05505 CXCL1_2_3; C-X-C motif chemokine 1/2/3	12.366	3.628	Yes (up-regulated)	1.97816e-06	chemokine (C-X-C motif) ligand 3 [Source:HGNC Symbol;Acc:HGNC:4604]	CXCL3	P19876	ENSG00000163734
Environmental Information Processing	Signaling molecules and interaction	Cytokine-cytokine receptor interaction	platelet factor 4 variant 1	K05407 PF4; platelet factor 4	12.282	3.618	Yes (up-regulated)	0.000508822	platelet factor 4 variant 1 [Source:HGNC Symbol;Acc:HGNC:8862]	PF4V1	P10720	ENSG00000109272
Environmental Information Processing	Signaling molecules and interaction	Viral protein interaction with cytokine and cytokine receptor	platelet factor 4 variant 1	K05407 PF4; platelet factor 4	12.282	3.618	Yes (up-regulated)	0.000508822	platelet factor 4 variant 1 [Source:HGNC Symbol;Acc:HGNC:8862]	PF4V1	P10720	ENSG00000109272
Organismal Systems	Immune system	Chemokine signaling pathway	platelet factor 4 variant 1	K05407 PF4; platelet factor 4	12.282	3.618	Yes (up-regulated)	0.000508822	platelet factor 4 variant 1 [Source:HGNC Symbol;Acc:HGNC:8862]	PF4V1	P10720	ENSG00000109272
Metabolism	Metabolism of cofactors and vitamins	Pantothenate and CoA biosynthesis	vanin 1	K08069 VNN; pantetheine hydrolase [EC:3.5.1.92]	12.243	3.614	Yes (up-regulated)	6.97329e-36	vanin 1 [Source:HGNC Symbol;Acc:HGNC:12705]	VNN1	O95497	ENSG00000112299
Environmental Information Processing	Signal transduction	Rap1 signaling pathway	lymphocyte cytosolic protein 2	K07361 LCP2; lymphocyte cytosolic protein 2	11.481	3.521	Yes (up-regulated)	0.00109176	lymphocyte cytosolic protein 2 [Source:HGNC Symbol;Acc:HGNC:6529]	LCP2	Q13094	ENSG00000043462
Organismal Systems	Development and regeneration	Osteoclast differentiation	lymphocyte cytosolic protein 2	K07361 LCP2; lymphocyte cytosolic protein 2	11.481	3.521	Yes (up-regulated)	0.00109176	lymphocyte cytosolic protein 2 [Source:HGNC Symbol;Acc:HGNC:6529]	LCP2	Q13094	ENSG00000043462
Organismal Systems	Immune system	Fc epsilon RI signaling pathway	lymphocyte cytosolic protein 2	K07361 LCP2; lymphocyte cytosolic protein 2	11.481	3.521	Yes (up-regulated)	0.00109176	lymphocyte cytosolic protein 2 [Source:HGNC Symbol;Acc:HGNC:6529]	LCP2	Q13094	ENSG00000043462
Organismal Systems	Immune system	Natural killer cell mediated cytotoxicity	lymphocyte cytosolic protein 2	K07361 LCP2; lymphocyte cytosolic protein 2	11.481	3.521	Yes (up-regulated)	0.00109176	lymphocyte cytosolic protein 2 [Source:HGNC Symbol;Acc:HGNC:6529]	LCP2	Q13094	ENSG00000043462
Organismal Systems	Immune system	Platelet activation	lymphocyte cytosolic protein 2	K07361 LCP2; lymphocyte cytosolic protein 2	11.481	3.521	Yes (up-regulated)	0.00109176	lymphocyte cytosolic protein 2 [Source:HGNC Symbol;Acc:HGNC:6529]	LCP2	Q13094	ENSG00000043462
Organismal Systems	Immune system	T cell receptor signaling pathway	lymphocyte cytosolic protein 2	K07361 LCP2; lymphocyte cytosolic protein 2	11.481	3.521	Yes (up-regulated)	0.00109176	lymphocyte cytosolic protein 2 [Source:HGNC Symbol;Acc:HGNC:6529]	LCP2	Q13094	ENSG00000043462
Organismal Systems	Digestive system	Mineral absorption	metallothionein 1G	K14739 MT1_2; metallothionein 1/2	11.32	3.501	Yes (up-regulated)	0.0245293	metallothionein 1G [Source:HGNC Symbol;Acc:HGNC:7399]	MT1G	P13640	ENSG00000125144
Metabolism	Amino acid metabolism	Tryptophan metabolism	indoleamine 2,3-dioxygenase 1	K00463 IDO; indoleamine 2,3-dioxygenase [EC:1.13.11.52]	11.208	3.486	Yes (up-regulated)	0.020858	indoleamine 2,3-dioxygenase 1 [Source:HGNC Symbol;Acc:HGNC:6059]	IDO1	P14902	ENSG00000131203
Organismal Systems	Sensory system	Inflammatory mediator regulation of TRP channels	transient receptor potential cation channel subfamily A member 1	K04984 TRPA1; transient receptor potential cation channel subfamily A member 1	11.198	3.485	Yes (up-regulated)	6.03782e-07	transient receptor potential cation channel, subfamily A, member 1 [Source:HGNC Symbol;Acc:HGNC:497]	TRPA1	O75762	ENSG00000104321
Cellular Processes	Transport and catabolism	Phagosome	CD14 molecule	K04391 CD14; monocyte differentiation antigen CD14	10.986	3.458	Yes (up-regulated)	3.7772e-37	CD14 molecule [Source:HGNC Symbol;Acc:HGNC:1628]	CD14	P08571	ENSG00000170458
Environmental Information Processing	Signal transduction	MAPK signaling pathway	CD14 molecule	K04391 CD14; monocyte differentiation antigen CD14	10.986	3.458	Yes (up-regulated)	3.7772e-37	CD14 molecule [Source:HGNC Symbol;Acc:HGNC:1628]	CD14	P08571	ENSG00000170458
Environmental Information Processing	Signal transduction	NF-kappa B signaling pathway	CD14 molecule	K04391 CD14; monocyte differentiation antigen CD14	10.986	3.458	Yes (up-regulated)	3.7772e-37	CD14 molecule [Source:HGNC Symbol;Acc:HGNC:1628]	CD14	P08571	ENSG00000170458
Organismal Systems	Immune system	Hematopoietic cell lineage	CD14 molecule	K04391 CD14; monocyte differentiation antigen CD14	10.986	3.458	Yes (up-regulated)	3.7772e-37	CD14 molecule [Source:HGNC Symbol;Acc:HGNC:1628]	CD14	P08571	ENSG00000170458
Organismal Systems	Immune system	Toll-like receptor signaling pathway	CD14 molecule	K04391 CD14; monocyte differentiation antigen CD14	10.986	3.458	Yes (up-regulated)	3.7772e-37	CD14 molecule [Source:HGNC Symbol;Acc:HGNC:1628]	CD14	P08571	ENSG00000170458
Environmental Information Processing	Signal transduction	JAK-STAT signaling pathway	interleukin 24	K22668 IL24; interleukin 24	10.628	3.41	Yes (up-regulated)	0.028308	interleukin 24 [Source:HGNC Symbol;Acc:HGNC:11346]	IL24	Q13007	ENSG00000162892
Environmental Information Processing	Signaling molecules and interaction	Cytokine-cytokine receptor interaction	interleukin 24	K22668 IL24; interleukin 24	10.628	3.41	Yes (up-regulated)	0.028308	interleukin 24 [Source:HGNC Symbol;Acc:HGNC:11346]	IL24	Q13007	ENSG00000162892
Environmental Information Processing	Signaling molecules and interaction	Viral protein interaction with cytokine and cytokine receptor	interleukin 24	K22668 IL24; interleukin 24	10.628	3.41	Yes (up-regulated)	0.028308	interleukin 24 [Source:HGNC Symbol;Acc:HGNC:11346]	IL24	Q13007	ENSG00000162892
Environmental Information Processing	Signal transduction	Wnt signaling pathway	catenin delta 2	K23491 CTNND2; catenin delta-2	10.502	3.393	Yes (up-regulated)	0.00450458	catenin delta 2 [Source:HGNC Symbol;Acc:HGNC:2516]	CTNND2	Q9UQB3	ENSG00000169862
Environmental Information Processing	Signal transduction	Wnt signaling pathway	secreted frizzled related protein 2	K02176 SFRP2; secreted frizzled-related protein 2	10.471	3.388	Yes (up-regulated)	0.000568464	secreted frizzled-related protein 2 [Source:HGNC Symbol;Acc:HGNC:10777]	SFRP2	Q96HF1	ENSG00000145423
Organismal Systems	Immune system	Cytosolic DNA-sensing pathway	absent in melanoma 2	K12966 AIM2; absent in melanoma 2	10.126	3.34	Yes (up-regulated)	1.21908e-07	absent in melanoma 2 [Source:HGNC Symbol;Acc:HGNC:357]	AIM2	O14862	ENSG00000163568
Organismal Systems	Immune system	NOD-like receptor signaling pathway	absent in melanoma 2	K12966 AIM2; absent in melanoma 2	10.126	3.34	Yes (up-regulated)	1.21908e-07	absent in melanoma 2 [Source:HGNC Symbol;Acc:HGNC:357]	AIM2	O14862	ENSG00000163568
Not Included in Pathway or Brite	Unclassified: metabolism	Enzymes with EC numbers	ATPase secretory pathway Ca2+ transporting 2	K01537 ATP2C; P-type Ca2+ transporter type 2C [EC:7.2.2.10]	10.055	3.33	Yes (up-regulated)	0.000879767	ATPase, Ca++ transporting, type 2C, member 2 [Source:HGNC Symbol;Acc:HGNC:29103]	ATP2C2	O75185	ENSG00000064270
Cellular Processes	Cell growth and death	Oocyte meiosis	adenylate cyclase 4	K08044 ADCY4; adenylate cyclase 4 [EC:4.6.1.1]	9.989	3.32	Yes (up-regulated)	1.21669e-05	adenylate cyclase 4 [Source:HGNC Symbol;Acc:HGNC:235]	ADCY4	Q8NFM4	ENSG00000129467
Cellular Processes	Cellular community - eukaryotes	Gap junction	adenylate cyclase 4	K08044 ADCY4; adenylate cyclase 4 [EC:4.6.1.1]	9.989	3.32	Yes (up-regulated)	1.21669e-05	adenylate cyclase 4 [Source:HGNC Symbol;Acc:HGNC:235]	ADCY4	Q8NFM4	ENSG00000129467
Environmental Information Processing	Signal transduction	Apelin signaling pathway	adenylate cyclase 4	K08044 ADCY4; adenylate cyclase 4 [EC:4.6.1.1]	9.989	3.32	Yes (up-regulated)	1.21669e-05	adenylate cyclase 4 [Source:HGNC Symbol;Acc:HGNC:235]	ADCY4	Q8NFM4	ENSG00000129467
Environmental Information Processing	Signal transduction	Calcium signaling pathway	adenylate cyclase 4	K08044 ADCY4; adenylate cyclase 4 [EC:4.6.1.1]	9.989	3.32	Yes (up-regulated)	1.21669e-05	adenylate cyclase 4 [Source:HGNC Symbol;Acc:HGNC:235]	ADCY4	Q8NFM4	ENSG00000129467
Environmental Information Processing	Signal transduction	cAMP signaling pathway	adenylate cyclase 4	K08044 ADCY4; adenylate cyclase 4 [EC:4.6.1.1]	9.989	3.32	Yes (up-regulated)	1.21669e-05	adenylate cyclase 4 [Source:HGNC Symbol;Acc:HGNC:235]	ADCY4	Q8NFM4	ENSG00000129467
Environmental Information Processing	Signal transduction	cGMP-PKG signaling pathway	adenylate cyclase 4	K08044 ADCY4; adenylate cyclase 4 [EC:4.6.1.1]	9.989	3.32	Yes (up-regulated)	1.21669e-05	adenylate cyclase 4 [Source:HGNC Symbol;Acc:HGNC:235]	ADCY4	Q8NFM4	ENSG00000129467
Environmental Information Processing	Signal transduction	Phospholipase D signaling pathway	adenylate cyclase 4	K08044 ADCY4; adenylate cyclase 4 [EC:4.6.1.1]	9.989	3.32	Yes (up-regulated)	1.21669e-05	adenylate cyclase 4 [Source:HGNC Symbol;Acc:HGNC:235]	ADCY4	Q8NFM4	ENSG00000129467
Environmental Information Processing	Signal transduction	Rap1 signaling pathway	adenylate cyclase 4	K08044 ADCY4; adenylate cyclase 4 [EC:4.6.1.1]	9.989	3.32	Yes (up-regulated)	1.21669e-05	adenylate cyclase 4 [Source:HGNC Symbol;Acc:HGNC:235]	ADCY4	Q8NFM4	ENSG00000129467
Metabolism	Nucleotide metabolism	Purine metabolism	adenylate cyclase 4	K08044 ADCY4; adenylate cyclase 4 [EC:4.6.1.1]	9.989	3.32	Yes (up-regulated)	1.21669e-05	adenylate cyclase 4 [Source:HGNC Symbol;Acc:HGNC:235]	ADCY4	Q8NFM4	ENSG00000129467
Organismal Systems	Aging	Longevity regulating pathway	adenylate cyclase 4	K08044 ADCY4; adenylate cyclase 4 [EC:4.6.1.1]	9.989	3.32	Yes (up-regulated)	1.21669e-05	adenylate cyclase 4 [Source:HGNC Symbol;Acc:HGNC:235]	ADCY4	Q8NFM4	ENSG00000129467
Organismal Systems	Aging	Longevity regulating pathway - multiple species	adenylate cyclase 4	K08044 ADCY4; adenylate cyclase 4 [EC:4.6.1.1]	9.989	3.32	Yes (up-regulated)	1.21669e-05	adenylate cyclase 4 [Source:HGNC Symbol;Acc:HGNC:235]	ADCY4	Q8NFM4	ENSG00000129467
Organismal Systems	Circulatory system	Adrenergic signaling in cardiomyocytes	adenylate cyclase 4	K08044 ADCY4; adenylate cyclase 4 [EC:4.6.1.1]	9.989	3.32	Yes (up-regulated)	1.21669e-05	adenylate cyclase 4 [Source:HGNC Symbol;Acc:HGNC:235]	ADCY4	Q8NFM4	ENSG00000129467
Organismal Systems	Circulatory system	Vascular smooth muscle contraction	adenylate cyclase 4	K08044 ADCY4; adenylate cyclase 4 [EC:4.6.1.1]	9.989	3.32	Yes (up-regulated)	1.21669e-05	adenylate cyclase 4 [Source:HGNC Symbol;Acc:HGNC:235]	ADCY4	Q8NFM4	ENSG00000129467
Organismal Systems	Digestive system	Bile secretion	adenylate cyclase 4	K08044 ADCY4; adenylate cyclase 4 [EC:4.6.1.1]	9.989	3.32	Yes (up-regulated)	1.21669e-05	adenylate cyclase 4 [Source:HGNC Symbol;Acc:HGNC:235]	ADCY4	Q8NFM4	ENSG00000129467
Organismal Systems	Digestive system	Gastric acid secretion	adenylate cyclase 4	K08044 ADCY4; adenylate cyclase 4 [EC:4.6.1.1]	9.989	3.32	Yes (up-regulated)	1.21669e-05	adenylate cyclase 4 [Source:HGNC Symbol;Acc:HGNC:235]	ADCY4	Q8NFM4	ENSG00000129467
Organismal Systems	Digestive system	Pancreatic secretion	adenylate cyclase 4	K08044 ADCY4; adenylate cyclase 4 [EC:4.6.1.1]	9.989	3.32	Yes (up-regulated)	1.21669e-05	adenylate cyclase 4 [Source:HGNC Symbol;Acc:HGNC:235]	ADCY4	Q8NFM4	ENSG00000129467
Organismal Systems	Digestive system	Salivary secretion	adenylate cyclase 4	K08044 ADCY4; adenylate cyclase 4 [EC:4.6.1.1]	9.989	3.32	Yes (up-regulated)	1.21669e-05	adenylate cyclase 4 [Source:HGNC Symbol;Acc:HGNC:235]	ADCY4	Q8NFM4	ENSG00000129467
Organismal Systems	Endocrine system	Aldosterone synthesis and secretion	adenylate cyclase 4	K08044 ADCY4; adenylate cyclase 4 [EC:4.6.1.1]	9.989	3.32	Yes (up-regulated)	1.21669e-05	adenylate cyclase 4 [Source:HGNC Symbol;Acc:HGNC:235]	ADCY4	Q8NFM4	ENSG00000129467
Organismal Systems	Endocrine system	Cortisol synthesis and secretion	adenylate cyclase 4	K08044 ADCY4; adenylate cyclase 4 [EC:4.6.1.1]	9.989	3.32	Yes (up-regulated)	1.21669e-05	adenylate cyclase 4 [Source:HGNC Symbol;Acc:HGNC:235]	ADCY4	Q8NFM4	ENSG00000129467
Organismal Systems	Endocrine system	Estrogen signaling pathway	adenylate cyclase 4	K08044 ADCY4; adenylate cyclase 4 [EC:4.6.1.1]	9.989	3.32	Yes (up-regulated)	1.21669e-05	adenylate cyclase 4 [Source:HGNC Symbol;Acc:HGNC:235]	ADCY4	Q8NFM4	ENSG00000129467
Organismal Systems	Endocrine system	GnRH signaling pathway	adenylate cyclase 4	K08044 ADCY4; adenylate cyclase 4 [EC:4.6.1.1]	9.989	3.32	Yes (up-regulated)	1.21669e-05	adenylate cyclase 4 [Source:HGNC Symbol;Acc:HGNC:235]	ADCY4	Q8NFM4	ENSG00000129467
Organismal Systems	Endocrine system	Growth hormone synthesis, secretion and action	adenylate cyclase 4	K08044 ADCY4; adenylate cyclase 4 [EC:4.6.1.1]	9.989	3.32	Yes (up-regulated)	1.21669e-05	adenylate cyclase 4 [Source:HGNC Symbol;Acc:HGNC:235]	ADCY4	Q8NFM4	ENSG00000129467
Organismal Systems	Endocrine system	Insulin secretion	adenylate cyclase 4	K08044 ADCY4; adenylate cyclase 4 [EC:4.6.1.1]	9.989	3.32	Yes (up-regulated)	1.21669e-05	adenylate cyclase 4 [Source:HGNC Symbol;Acc:HGNC:235]	ADCY4	Q8NFM4	ENSG00000129467
Organismal Systems	Endocrine system	Melanogenesis	adenylate cyclase 4	K08044 ADCY4; adenylate cyclase 4 [EC:4.6.1.1]	9.989	3.32	Yes (up-regulated)	1.21669e-05	adenylate cyclase 4 [Source:HGNC Symbol;Acc:HGNC:235]	ADCY4	Q8NFM4	ENSG00000129467
Organismal Systems	Endocrine system	Ovarian steroidogenesis	adenylate cyclase 4	K08044 ADCY4; adenylate cyclase 4 [EC:4.6.1.1]	9.989	3.32	Yes (up-regulated)	1.21669e-05	adenylate cyclase 4 [Source:HGNC Symbol;Acc:HGNC:235]	ADCY4	Q8NFM4	ENSG00000129467
Organismal Systems	Endocrine system	Oxytocin signaling pathway	adenylate cyclase 4	K08044 ADCY4; adenylate cyclase 4 [EC:4.6.1.1]	9.989	3.32	Yes (up-regulated)	1.21669e-05	adenylate cyclase 4 [Source:HGNC Symbol;Acc:HGNC:235]	ADCY4	Q8NFM4	ENSG00000129467
Organismal Systems	Endocrine system	Parathyroid hormone synthesis, secretion and action	adenylate cyclase 4	K08044 ADCY4; adenylate cyclase 4 [EC:4.6.1.1]	9.989	3.32	Yes (up-regulated)	1.21669e-05	adenylate cyclase 4 [Source:HGNC Symbol;Acc:HGNC:235]	ADCY4	Q8NFM4	ENSG00000129467
Organismal Systems	Endocrine system	Progesterone-mediated oocyte maturation	adenylate cyclase 4	K08044 ADCY4; adenylate cyclase 4 [EC:4.6.1.1]	9.989	3.32	Yes (up-regulated)	1.21669e-05	adenylate cyclase 4 [Source:HGNC Symbol;Acc:HGNC:235]	ADCY4	Q8NFM4	ENSG00000129467
Organismal Systems	Endocrine system	Regulation of lipolysis in adipocytes	adenylate cyclase 4	K08044 ADCY4; adenylate cyclase 4 [EC:4.6.1.1]	9.989	3.32	Yes (up-regulated)	1.21669e-05	adenylate cyclase 4 [Source:HGNC Symbol;Acc:HGNC:235]	ADCY4	Q8NFM4	ENSG00000129467
Organismal Systems	Endocrine system	Relaxin signaling pathway	adenylate cyclase 4	K08044 ADCY4; adenylate cyclase 4 [EC:4.6.1.1]	9.989	3.32	Yes (up-regulated)	1.21669e-05	adenylate cyclase 4 [Source:HGNC Symbol;Acc:HGNC:235]	ADCY4	Q8NFM4	ENSG00000129467
Organismal Systems	Endocrine system	Thyroid hormone synthesis	adenylate cyclase 4	K08044 ADCY4; adenylate cyclase 4 [EC:4.6.1.1]	9.989	3.32	Yes (up-regulated)	1.21669e-05	adenylate cyclase 4 [Source:HGNC Symbol;Acc:HGNC:235]	ADCY4	Q8NFM4	ENSG00000129467
Organismal Systems	Environmental adaptation	Circadian entrainment	adenylate cyclase 4	K08044 ADCY4; adenylate cyclase 4 [EC:4.6.1.1]	9.989	3.32	Yes (up-regulated)	1.21669e-05	adenylate cyclase 4 [Source:HGNC Symbol;Acc:HGNC:235]	ADCY4	Q8NFM4	ENSG00000129467
Organismal Systems	Environmental adaptation	Thermogenesis	adenylate cyclase 4	K08044 ADCY4; adenylate cyclase 4 [EC:4.6.1.1]	9.989	3.32	Yes (up-regulated)	1.21669e-05	adenylate cyclase 4 [Source:HGNC Symbol;Acc:HGNC:235]	ADCY4	Q8NFM4	ENSG00000129467
Organismal Systems	Immune system	Chemokine signaling pathway	adenylate cyclase 4	K08044 ADCY4; adenylate cyclase 4 [EC:4.6.1.1]	9.989	3.32	Yes (up-regulated)	1.21669e-05	adenylate cyclase 4 [Source:HGNC Symbol;Acc:HGNC:235]	ADCY4	Q8NFM4	ENSG00000129467
Organismal Systems	Immune system	Platelet activation	adenylate cyclase 4	K08044 ADCY4; adenylate cyclase 4 [EC:4.6.1.1]	9.989	3.32	Yes (up-regulated)	1.21669e-05	adenylate cyclase 4 [Source:HGNC Symbol;Acc:HGNC:235]	ADCY4	Q8NFM4	ENSG00000129467
Organismal Systems	Nervous system	Cholinergic synapse	adenylate cyclase 4	K08044 ADCY4; adenylate cyclase 4 [EC:4.6.1.1]	9.989	3.32	Yes (up-regulated)	1.21669e-05	adenylate cyclase 4 [Source:HGNC Symbol;Acc:HGNC:235]	ADCY4	Q8NFM4	ENSG00000129467
Organismal Systems	Nervous system	GABAergic synapse	adenylate cyclase 4	K08044 ADCY4; adenylate cyclase 4 [EC:4.6.1.1]	9.989	3.32	Yes (up-regulated)	1.21669e-05	adenylate cyclase 4 [Source:HGNC Symbol;Acc:HGNC:235]	ADCY4	Q8NFM4	ENSG00000129467
Organismal Systems	Nervous system	Glutamatergic synapse	adenylate cyclase 4	K08044 ADCY4; adenylate cyclase 4 [EC:4.6.1.1]	9.989	3.32	Yes (up-regulated)	1.21669e-05	adenylate cyclase 4 [Source:HGNC Symbol;Acc:HGNC:235]	ADCY4	Q8NFM4	ENSG00000129467
Organismal Systems	Nervous system	Retrograde endocannabinoid signaling	adenylate cyclase 4	K08044 ADCY4; adenylate cyclase 4 [EC:4.6.1.1]	9.989	3.32	Yes (up-regulated)	1.21669e-05	adenylate cyclase 4 [Source:HGNC Symbol;Acc:HGNC:235]	ADCY4	Q8NFM4	ENSG00000129467
Organismal Systems	Sensory system	Inflammatory mediator regulation of TRP channels	adenylate cyclase 4	K08044 ADCY4; adenylate cyclase 4 [EC:4.6.1.1]	9.989	3.32	Yes (up-regulated)	1.21669e-05	adenylate cyclase 4 [Source:HGNC Symbol;Acc:HGNC:235]	ADCY4	Q8NFM4	ENSG00000129467
Organismal Systems	Sensory system	Taste transduction	adenylate cyclase 4	K08044 ADCY4; adenylate cyclase 4 [EC:4.6.1.1]	9.989	3.32	Yes (up-regulated)	1.21669e-05	adenylate cyclase 4 [Source:HGNC Symbol;Acc:HGNC:235]	ADCY4	Q8NFM4	ENSG00000129467
Environmental Information Processing	Signal transduction	MAPK signaling pathway	dual specificity phosphatase 4	K04459 DUSP; dual specificity MAP kinase phosphatase [EC:3.1.3.16 3.1.3.48]	9.95	3.315	Yes (up-regulated)	3.60675e-14	dual specificity phosphatase 4 [Source:HGNC Symbol;Acc:HGNC:3070]	DUSP4	Q13115	ENSG00000120875
Environmental Information Processing	Signaling molecules and interaction	Cytokine-cytokine receptor interaction	TNF superfamily member 15	K05478 TNFSF15; tumor necrosis factor ligand superfamily member 15	9.842	3.299	Yes (up-regulated)	3.86298e-20	tumor necrosis factor superfamily member 15 [Source:HGNC Symbol;Acc:HGNC:11931]	TNFSF15	O95150	ENSG00000181634
Environmental Information Processing	Signaling molecules and interaction	Neuroactive ligand-receptor interaction	gamma-aminobutyric acid type A receptor subunit alpha2	K05175 GABRA; gamma-aminobutyric acid receptor subunit alpha	9.198	3.201	Yes (up-regulated)	7.47279e-11	gamma-aminobutyric acid (GABA) A receptor, alpha 2 [Source:HGNC Symbol;Acc:HGNC:4076]	GABRA2	P47869	ENSG00000151834
Organismal Systems	Nervous system	GABAergic synapse	gamma-aminobutyric acid type A receptor subunit alpha2	K05175 GABRA; gamma-aminobutyric acid receptor subunit alpha	9.198	3.201	Yes (up-regulated)	7.47279e-11	gamma-aminobutyric acid (GABA) A receptor, alpha 2 [Source:HGNC Symbol;Acc:HGNC:4076]	GABRA2	P47869	ENSG00000151834
Organismal Systems	Nervous system	Retrograde endocannabinoid signaling	gamma-aminobutyric acid type A receptor subunit alpha2	K05175 GABRA; gamma-aminobutyric acid receptor subunit alpha	9.198	3.201	Yes (up-regulated)	7.47279e-11	gamma-aminobutyric acid (GABA) A receptor, alpha 2 [Source:HGNC Symbol;Acc:HGNC:4076]	GABRA2	P47869	ENSG00000151834
Organismal Systems	Sensory system	Taste transduction	gamma-aminobutyric acid type A receptor subunit alpha2	K05175 GABRA; gamma-aminobutyric acid receptor subunit alpha	9.198	3.201	Yes (up-regulated)	7.47279e-11	gamma-aminobutyric acid (GABA) A receptor, alpha 2 [Source:HGNC Symbol;Acc:HGNC:4076]	GABRA2	P47869	ENSG00000151834
Metabolism	Amino acid metabolism	Cysteine and methionine metabolism	cysteine dioxygenase type 1	K00456 CDO1; cysteine dioxygenase [EC:1.13.11.20]	9.144	3.193	Yes (up-regulated)	0.00461443	cysteine dioxygenase type 1 [Source:HGNC Symbol;Acc:HGNC:1795]	CDO1	Q16878	ENSG00000129596
Metabolism	Metabolism of other amino acids	Taurine and hypotaurine metabolism	cysteine dioxygenase type 1	K00456 CDO1; cysteine dioxygenase [EC:1.13.11.20]	9.144	3.193	Yes (up-regulated)	0.00461443	cysteine dioxygenase type 1 [Source:HGNC Symbol;Acc:HGNC:1795]	CDO1	Q16878	ENSG00000129596
Cellular Processes	Cellular community - eukaryotes	Tight junction	CD1d molecule	K06448 CD1; T-cell surface glycoprotein CD1	8.894	3.153	Yes (up-regulated)	0.000869012	CD1d molecule [Source:HGNC Symbol;Acc:HGNC:1637]	CD1D	P15813	ENSG00000158473
Organismal Systems	Immune system	Hematopoietic cell lineage	CD1d molecule	K06448 CD1; T-cell surface glycoprotein CD1	8.894	3.153	Yes (up-regulated)	0.000869012	CD1d molecule [Source:HGNC Symbol;Acc:HGNC:1637]	CD1D	P15813	ENSG00000158473
Organismal Systems	Immune system	NOD-like receptor signaling pathway	guanylate binding protein 7	K20899 GBP1_3_4_7; guanylate-binding protein 1/3/4/7	8.86	3.147	Yes (up-regulated)	0.0342555	guanylate binding protein 7 [Source:HGNC Symbol;Acc:HGNC:29606]	GBP7	Q8N8V2	ENSG00000213512
Metabolism	Glycan biosynthesis and metabolism	Mucin type O-glycan biosynthesis	polypeptide N-acetylgalactosaminyltransferase 15	K00710 GALNT; polypeptide N-acetylgalactosaminyltransferase [EC:2.4.1.41]	8.85	3.146	Yes (up-regulated)	8.01971e-05	polypeptide N-acetylgalactosaminyltransferase 15 [Source:HGNC Symbol;Acc:HGNC:21531]	GALNT15	Q8N3T1	ENSG00000131386
Metabolism	Glycan biosynthesis and metabolism	Other types of O-glycan biosynthesis	polypeptide N-acetylgalactosaminyltransferase 15	K00710 GALNT; polypeptide N-acetylgalactosaminyltransferase [EC:2.4.1.41]	8.85	3.146	Yes (up-regulated)	8.01971e-05	polypeptide N-acetylgalactosaminyltransferase 15 [Source:HGNC Symbol;Acc:HGNC:21531]	GALNT15	Q8N3T1	ENSG00000131386
Cellular Processes	Cell growth and death	Apoptosis	cathepsin S	K01368 CTSS; cathepsin S [EC:3.4.22.27]	8.709	3.122	Yes (up-regulated)	2.68574e-34	cathepsin S [Source:HGNC Symbol;Acc:HGNC:2545]	CTSS	P25774	ENSG00000163131
Cellular Processes	Transport and catabolism	Lysosome	cathepsin S	K01368 CTSS; cathepsin S [EC:3.4.22.27]	8.709	3.122	Yes (up-regulated)	2.68574e-34	cathepsin S [Source:HGNC Symbol;Acc:HGNC:2545]	CTSS	P25774	ENSG00000163131
Cellular Processes	Transport and catabolism	Phagosome	cathepsin S	K01368 CTSS; cathepsin S [EC:3.4.22.27]	8.709	3.122	Yes (up-regulated)	2.68574e-34	cathepsin S [Source:HGNC Symbol;Acc:HGNC:2545]	CTSS	P25774	ENSG00000163131
Organismal Systems	Immune system	Antigen processing and presentation	cathepsin S	K01368 CTSS; cathepsin S [EC:3.4.22.27]	8.709	3.122	Yes (up-regulated)	2.68574e-34	cathepsin S [Source:HGNC Symbol;Acc:HGNC:2545]	CTSS	P25774	ENSG00000163131
Environmental Information Processing	Signaling molecules and interaction	Cell adhesion molecules	neuronal cell adhesion molecule	K06756 NRCAM; neuronal cell adhesion molecule	8.432	3.076	Yes (up-regulated)	2.57429e-19	neuronal cell adhesion molecule [Source:HGNC Symbol;Acc:HGNC:7994]	NRCAM	Q92823	ENSG00000091129
Cellular Processes	Transport and catabolism	Peroxisome	xanthine dehydrogenase	K00106 XDH; xanthine dehydrogenase/oxidase [EC:1.17.1.4 1.17.3.2]	8.402	3.071	Yes (up-regulated)	3.21605e-13	xanthine dehydrogenase [Source:HGNC Symbol;Acc:HGNC:12805]	XDH	P47989	ENSG00000158125
Metabolism	Biosynthesis of other secondary metabolites	Caffeine metabolism	xanthine dehydrogenase	K00106 XDH; xanthine dehydrogenase/oxidase [EC:1.17.1.4 1.17.3.2]	8.402	3.071	Yes (up-regulated)	3.21605e-13	xanthine dehydrogenase [Source:HGNC Symbol;Acc:HGNC:12805]	XDH	P47989	ENSG00000158125
Metabolism	Nucleotide metabolism	Purine metabolism	xanthine dehydrogenase	K00106 XDH; xanthine dehydrogenase/oxidase [EC:1.17.1.4 1.17.3.2]	8.402	3.071	Yes (up-regulated)	3.21605e-13	xanthine dehydrogenase [Source:HGNC Symbol;Acc:HGNC:12805]	XDH	P47989	ENSG00000158125
Metabolism	Xenobiotics biodegradation and metabolism	Drug metabolism - other enzymes	xanthine dehydrogenase	K00106 XDH; xanthine dehydrogenase/oxidase [EC:1.17.1.4 1.17.3.2]	8.402	3.071	Yes (up-regulated)	3.21605e-13	xanthine dehydrogenase [Source:HGNC Symbol;Acc:HGNC:12805]	XDH	P47989	ENSG00000158125
Metabolism	Glycan biosynthesis and metabolism	Glycosaminoglycan biosynthesis - heparan sulfate / heparin	heparan sulfate-glucosamine 3-sulfotransferase 3A1	K07809 HS3ST3; [heparan sulfate]-glucosamine 3-sulfotransferase 3 [EC:2.8.2.30]	8.239	3.043	Yes (up-regulated)	0.00366291	heparan sulfate-glucosamine 3-sulfotransferase 3A1 [Source:HGNC Symbol;Acc:HGNC:5196]	HS3ST3A1	Q9Y663	ENSG00000153976
Not Included in Pathway or Brite	Unclassified: signaling and cellular processes	Structural proteins	tetraspanin 2	K17354 TSPAN2; tetraspanin-2	8.004	3.001	Yes (up-regulated)	2.07152e-19	tetraspanin 2 [Source:HGNC Symbol;Acc:HGNC:20659]	TSPAN2	O60636	ENSG00000134198
Cellular Processes	Cell growth and death	Apoptosis	baculoviral IAP repeat containing 3	K16060 BIRC2_3; baculoviral IAP repeat-containing protein 2/3	7.959	2.993	No	1.4678e-29	baculoviral IAP repeat containing 3 [Source:HGNC Symbol;Acc:HGNC:591]	BIRC3	Q13489	ENSG00000023445
Cellular Processes	Cell growth and death	Apoptosis - multiple species	baculoviral IAP repeat containing 3	K16060 BIRC2_3; baculoviral IAP repeat-containing protein 2/3	7.959	2.993	No	1.4678e-29	baculoviral IAP repeat containing 3 [Source:HGNC Symbol;Acc:HGNC:591]	BIRC3	Q13489	ENSG00000023445
Cellular Processes	Cell growth and death	Necroptosis	baculoviral IAP repeat containing 3	K16060 BIRC2_3; baculoviral IAP repeat-containing protein 2/3	7.959	2.993	No	1.4678e-29	baculoviral IAP repeat containing 3 [Source:HGNC Symbol;Acc:HGNC:591]	BIRC3	Q13489	ENSG00000023445
Cellular Processes	Cellular community - eukaryotes	Focal adhesion	baculoviral IAP repeat containing 3	K16060 BIRC2_3; baculoviral IAP repeat-containing protein 2/3	7.959	2.993	No	1.4678e-29	baculoviral IAP repeat containing 3 [Source:HGNC Symbol;Acc:HGNC:591]	BIRC3	Q13489	ENSG00000023445
Environmental Information Processing	Signal transduction	Hippo signaling pathway	baculoviral IAP repeat containing 3	K16060 BIRC2_3; baculoviral IAP repeat-containing protein 2/3	7.959	2.993	No	1.4678e-29	baculoviral IAP repeat containing 3 [Source:HGNC Symbol;Acc:HGNC:591]	BIRC3	Q13489	ENSG00000023445
Environmental Information Processing	Signal transduction	NF-kappa B signaling pathway	baculoviral IAP repeat containing 3	K16060 BIRC2_3; baculoviral IAP repeat-containing protein 2/3	7.959	2.993	No	1.4678e-29	baculoviral IAP repeat containing 3 [Source:HGNC Symbol;Acc:HGNC:591]	BIRC3	Q13489	ENSG00000023445
Environmental Information Processing	Signal transduction	TNF signaling pathway	baculoviral IAP repeat containing 3	K16060 BIRC2_3; baculoviral IAP repeat-containing protein 2/3	7.959	2.993	No	1.4678e-29	baculoviral IAP repeat containing 3 [Source:HGNC Symbol;Acc:HGNC:591]	BIRC3	Q13489	ENSG00000023445
Genetic Information Processing	Folding, sorting and degradation	Ubiquitin mediated proteolysis	baculoviral IAP repeat containing 3	K16060 BIRC2_3; baculoviral IAP repeat-containing protein 2/3	7.959	2.993	No	1.4678e-29	baculoviral IAP repeat containing 3 [Source:HGNC Symbol;Acc:HGNC:591]	BIRC3	Q13489	ENSG00000023445
Organismal Systems	Immune system	NOD-like receptor signaling pathway	baculoviral IAP repeat containing 3	K16060 BIRC2_3; baculoviral IAP repeat-containing protein 2/3	7.959	2.993	No	1.4678e-29	baculoviral IAP repeat containing 3 [Source:HGNC Symbol;Acc:HGNC:591]	BIRC3	Q13489	ENSG00000023445
Metabolism	Lipid metabolism	Biosynthesis of unsaturated fatty acids	ELOVL fatty acid elongase 7	K10250 ELOVL7; elongation of very long chain fatty acids protein 7 [EC:2.3.1.199]	7.698	2.944	No	1.67854e-06	ELOVL fatty acid elongase 7 [Source:HGNC Symbol;Acc:HGNC:26292]	ELOVL7	A1L3X0	ENSG00000164181
Metabolism	Lipid metabolism	Fatty acid elongation	ELOVL fatty acid elongase 7	K10250 ELOVL7; elongation of very long chain fatty acids protein 7 [EC:2.3.1.199]	7.698	2.944	No	1.67854e-06	ELOVL fatty acid elongase 7 [Source:HGNC Symbol;Acc:HGNC:26292]	ELOVL7	A1L3X0	ENSG00000164181
Cellular Processes	Cell growth and death	Necroptosis	signal transducer and activator of transcription 4	K11222 STAT4; signal transducer and activator of transcription 4	7.664	2.938	No	1.18435e-08	signal transducer and activator of transcription 4 [Source:HGNC Symbol;Acc:HGNC:11365]	STAT4	Q14765	ENSG00000138378
Environmental Information Processing	Signal transduction	JAK-STAT signaling pathway	signal transducer and activator of transcription 4	K11222 STAT4; signal transducer and activator of transcription 4	7.664	2.938	No	1.18435e-08	signal transducer and activator of transcription 4 [Source:HGNC Symbol;Acc:HGNC:11365]	STAT4	Q14765	ENSG00000138378
Organismal Systems	Immune system	Th1 and Th2 cell differentiation	signal transducer and activator of transcription 4	K11222 STAT4; signal transducer and activator of transcription 4	7.664	2.938	No	1.18435e-08	signal transducer and activator of transcription 4 [Source:HGNC Symbol;Acc:HGNC:11365]	STAT4	Q14765	ENSG00000138378
Environmental Information Processing	Signaling molecules and interaction	Cytokine-cytokine receptor interaction	interleukin 1 receptor antagonist	K05481 IL1RN; interleukin 1 receptor antagonist	7.509	2.909	No	4.17196e-05	interleukin 1 receptor antagonist [Source:HGNC Symbol;Acc:HGNC:6000]	IL1RN	P18510	ENSG00000136689
Environmental Information Processing	Signaling molecules and interaction	Cytokine-cytokine receptor interaction	TNF receptor superfamily member 10d	K22702 TNFRSF10D; tumor necrosis factor receptor superfamily member 10D	7.424	2.892	No	0.0378563	tumor necrosis factor receptor superfamily member 10d [Source:HGNC Symbol;Acc:HGNC:11907]	TNFRSF10D	Q9UBN6	ENSG00000173530
Environmental Information Processing	Signaling molecules and interaction	Viral protein interaction with cytokine and cytokine receptor	TNF receptor superfamily member 10d	K22702 TNFRSF10D; tumor necrosis factor receptor superfamily member 10D	7.424	2.892	No	0.0378563	tumor necrosis factor receptor superfamily member 10d [Source:HGNC Symbol;Acc:HGNC:11907]	TNFRSF10D	Q9UBN6	ENSG00000173530
Environmental Information Processing	Signal transduction	TNF signaling pathway	nucleotide binding oligomerization domain containing 2	K10165 NOD2; nucleotide-binding oligomerization domain-containing protein 2	7.305	2.869	No	5.18649e-10	nucleotide binding oligomerization domain containing 2 [Source:HGNC Symbol;Acc:HGNC:5331]	NOD2	Q9HC29	ENSG00000167207
Organismal Systems	Immune system	NOD-like receptor signaling pathway	nucleotide binding oligomerization domain containing 2	K10165 NOD2; nucleotide-binding oligomerization domain-containing protein 2	7.305	2.869	No	5.18649e-10	nucleotide binding oligomerization domain containing 2 [Source:HGNC Symbol;Acc:HGNC:5331]	NOD2	Q9HC29	ENSG00000167207
Environmental Information Processing	Signal transduction	Calcium signaling pathway	5-hydroxytryptamine receptor 4	K04160 HTR4; 5-hydroxytryptamine receptor 4	7.265	2.861	No	0.0174016	5-hydroxytryptamine (serotonin) receptor 4, G protein-coupled [Source:HGNC Symbol;Acc:HGNC:5299]	HTR4	Q13639	ENSG00000164270
Environmental Information Processing	Signal transduction	cAMP signaling pathway	5-hydroxytryptamine receptor 4	K04160 HTR4; 5-hydroxytryptamine receptor 4	7.265	2.861	No	0.0174016	5-hydroxytryptamine (serotonin) receptor 4, G protein-coupled [Source:HGNC Symbol;Acc:HGNC:5299]	HTR4	Q13639	ENSG00000164270
Environmental Information Processing	Signaling molecules and interaction	Neuroactive ligand-receptor interaction	5-hydroxytryptamine receptor 4	K04160 HTR4; 5-hydroxytryptamine receptor 4	7.265	2.861	No	0.0174016	5-hydroxytryptamine (serotonin) receptor 4, G protein-coupled [Source:HGNC Symbol;Acc:HGNC:5299]	HTR4	Q13639	ENSG00000164270
Organismal Systems	Nervous system	Serotonergic synapse	5-hydroxytryptamine receptor 4	K04160 HTR4; 5-hydroxytryptamine receptor 4	7.265	2.861	No	0.0174016	5-hydroxytryptamine (serotonin) receptor 4, G protein-coupled [Source:HGNC Symbol;Acc:HGNC:5299]	HTR4	Q13639	ENSG00000164270
Environmental Information Processing	Signal transduction	Calcium signaling pathway	glutamate ionotropic receptor NMDA type subunit 2A	K05209 GRIN2A; glutamate receptor ionotropic, NMDA 2A	7.096	2.827	No	0.000407882	glutamate receptor, ionotropic, N-methyl D-aspartate 2A [Source:HGNC Symbol;Acc:HGNC:4585]	GRIN2A	Q12879	ENSG00000183454
Environmental Information Processing	Signal transduction	cAMP signaling pathway	glutamate ionotropic receptor NMDA type subunit 2A	K05209 GRIN2A; glutamate receptor ionotropic, NMDA 2A	7.096	2.827	No	0.000407882	glutamate receptor, ionotropic, N-methyl D-aspartate 2A [Source:HGNC Symbol;Acc:HGNC:4585]	GRIN2A	Q12879	ENSG00000183454
Environmental Information Processing	Signal transduction	Rap1 signaling pathway	glutamate ionotropic receptor NMDA type subunit 2A	K05209 GRIN2A; glutamate receptor ionotropic, NMDA 2A	7.096	2.827	No	0.000407882	glutamate receptor, ionotropic, N-methyl D-aspartate 2A [Source:HGNC Symbol;Acc:HGNC:4585]	GRIN2A	Q12879	ENSG00000183454
Environmental Information Processing	Signal transduction	Ras signaling pathway	glutamate ionotropic receptor NMDA type subunit 2A	K05209 GRIN2A; glutamate receptor ionotropic, NMDA 2A	7.096	2.827	No	0.000407882	glutamate receptor, ionotropic, N-methyl D-aspartate 2A [Source:HGNC Symbol;Acc:HGNC:4585]	GRIN2A	Q12879	ENSG00000183454
Environmental Information Processing	Signaling molecules and interaction	Neuroactive ligand-receptor interaction	glutamate ionotropic receptor NMDA type subunit 2A	K05209 GRIN2A; glutamate receptor ionotropic, NMDA 2A	7.096	2.827	No	0.000407882	glutamate receptor, ionotropic, N-methyl D-aspartate 2A [Source:HGNC Symbol;Acc:HGNC:4585]	GRIN2A	Q12879	ENSG00000183454
Organismal Systems	Environmental adaptation	Circadian entrainment	glutamate ionotropic receptor NMDA type subunit 2A	K05209 GRIN2A; glutamate receptor ionotropic, NMDA 2A	7.096	2.827	No	0.000407882	glutamate receptor, ionotropic, N-methyl D-aspartate 2A [Source:HGNC Symbol;Acc:HGNC:4585]	GRIN2A	Q12879	ENSG00000183454
Organismal Systems	Nervous system	Dopaminergic synapse	glutamate ionotropic receptor NMDA type subunit 2A	K05209 GRIN2A; glutamate receptor ionotropic, NMDA 2A	7.096	2.827	No	0.000407882	glutamate receptor, ionotropic, N-methyl D-aspartate 2A [Source:HGNC Symbol;Acc:HGNC:4585]	GRIN2A	Q12879	ENSG00000183454
Organismal Systems	Nervous system	Glutamatergic synapse	glutamate ionotropic receptor NMDA type subunit 2A	K05209 GRIN2A; glutamate receptor ionotropic, NMDA 2A	7.096	2.827	No	0.000407882	glutamate receptor, ionotropic, N-methyl D-aspartate 2A [Source:HGNC Symbol;Acc:HGNC:4585]	GRIN2A	Q12879	ENSG00000183454
Organismal Systems	Nervous system	Long-term potentiation	glutamate ionotropic receptor NMDA type subunit 2A	K05209 GRIN2A; glutamate receptor ionotropic, NMDA 2A	7.096	2.827	No	0.000407882	glutamate receptor, ionotropic, N-methyl D-aspartate 2A [Source:HGNC Symbol;Acc:HGNC:4585]	GRIN2A	Q12879	ENSG00000183454
Environmental Information Processing	Signal transduction	JAK-STAT signaling pathway	cytokine receptor like factor 2	K05078 TSLPR; thymic stromal-derived lymphopoietin receptor	7.025	2.812	No	2.21613e-11	cytokine receptor-like factor 2 [Source:HGNC Symbol;Acc:HGNC:14281]	CRLF2	Q9HC73	ENSG00000205755
Environmental Information Processing	Signaling molecules and interaction	Cytokine-cytokine receptor interaction	cytokine receptor like factor 2	K05078 TSLPR; thymic stromal-derived lymphopoietin receptor	7.025	2.812	No	2.21613e-11	cytokine receptor-like factor 2 [Source:HGNC Symbol;Acc:HGNC:14281]	CRLF2	Q9HC73	ENSG00000205755
Cellular Processes	Cellular community - eukaryotes	Signaling pathways regulating pluripotency of stem cells	Wnt family member 7B	K00572 WNT7; wingless-type MMTV integration site family, member 7	6.929	2.793	No	0.000133554	wingless-type MMTV integration site family member 7B [Source:HGNC Symbol;Acc:HGNC:12787]	WNT7B	P56706	ENSG00000188064
Environmental Information Processing	Signal transduction	Hippo signaling pathway	Wnt family member 7B	K00572 WNT7; wingless-type MMTV integration site family, member 7	6.929	2.793	No	0.000133554	wingless-type MMTV integration site family member 7B [Source:HGNC Symbol;Acc:HGNC:12787]	WNT7B	P56706	ENSG00000188064
Environmental Information Processing	Signal transduction	mTOR signaling pathway	Wnt family member 7B	K00572 WNT7; wingless-type MMTV integration site family, member 7	6.929	2.793	No	0.000133554	wingless-type MMTV integration site family member 7B [Source:HGNC Symbol;Acc:HGNC:12787]	WNT7B	P56706	ENSG00000188064
Environmental Information Processing	Signal transduction	Wnt signaling pathway	Wnt family member 7B	K00572 WNT7; wingless-type MMTV integration site family, member 7	6.929	2.793	No	0.000133554	wingless-type MMTV integration site family member 7B [Source:HGNC Symbol;Acc:HGNC:12787]	WNT7B	P56706	ENSG00000188064
Organismal Systems	Endocrine system	Melanogenesis	Wnt family member 7B	K00572 WNT7; wingless-type MMTV integration site family, member 7	6.929	2.793	No	0.000133554	wingless-type MMTV integration site family member 7B [Source:HGNC Symbol;Acc:HGNC:12787]	WNT7B	P56706	ENSG00000188064
Cellular Processes	Cell growth and death	Apoptosis	interleukin 3 receptor subunit alpha	K04737 IL3RA; interleukin 3 receptor alpha	6.904	2.787	No	3.15728e-27	interleukin 3 receptor subunit alpha [Source:HGNC Symbol;Acc:HGNC:6012]	IL3RA	P26951	ENSG00000185291
Environmental Information Processing	Signal transduction	JAK-STAT signaling pathway	interleukin 3 receptor subunit alpha	K04737 IL3RA; interleukin 3 receptor alpha	6.904	2.787	No	3.15728e-27	interleukin 3 receptor subunit alpha [Source:HGNC Symbol;Acc:HGNC:6012]	IL3RA	P26951	ENSG00000185291
Environmental Information Processing	Signal transduction	PI3K-Akt signaling pathway	interleukin 3 receptor subunit alpha	K04737 IL3RA; interleukin 3 receptor alpha	6.904	2.787	No	3.15728e-27	interleukin 3 receptor subunit alpha [Source:HGNC Symbol;Acc:HGNC:6012]	IL3RA	P26951	ENSG00000185291
Environmental Information Processing	Signaling molecules and interaction	Cytokine-cytokine receptor interaction	interleukin 3 receptor subunit alpha	K04737 IL3RA; interleukin 3 receptor alpha	6.904	2.787	No	3.15728e-27	interleukin 3 receptor subunit alpha [Source:HGNC Symbol;Acc:HGNC:6012]	IL3RA	P26951	ENSG00000185291
Organismal Systems	Immune system	Hematopoietic cell lineage	interleukin 3 receptor subunit alpha	K04737 IL3RA; interleukin 3 receptor alpha	6.904	2.787	No	3.15728e-27	interleukin 3 receptor subunit alpha [Source:HGNC Symbol;Acc:HGNC:6012]	IL3RA	P26951	ENSG00000185291
Environmental Information Processing	Membrane transport	ABC transporters	ATP binding cassette subfamily C member 3	K05667 ABCC3; ATP-binding cassette, subfamily C (CFTR/MRP), member 3	6.869	2.78	No	0.0154824	ATP binding cassette subfamily C member 3 [Source:HGNC Symbol;Acc:HGNC:54]	ABCC3	O15438	ENSG00000108846
Organismal Systems	Digestive system	Bile secretion	ATP binding cassette subfamily C member 3	K05667 ABCC3; ATP-binding cassette, subfamily C (CFTR/MRP), member 3	6.869	2.78	No	0.0154824	ATP binding cassette subfamily C member 3 [Source:HGNC Symbol;Acc:HGNC:54]	ABCC3	O15438	ENSG00000108846
Environmental Information Processing	Membrane transport	ABC transporters	ATP binding cassette subfamily C member 9	K05033 ABCC9; ATP-binding cassette subfamily C (CFTR/MRP) member 9	6.859	2.778	No	0.00470302	ATP binding cassette subfamily C member 9 [Source:HGNC Symbol;Acc:HGNC:60]	ABCC9	O60706	ENSG00000069431
Metabolism	Lipid metabolism	Ether lipid metabolism	ectonucleotide pyrophosphatase/phosphodiesterase 2	K01122 ENPP2; ectonucleotide pyrophosphatase/phosphodiesterase family member 2 [EC:3.1.4.39]	6.852	2.776	No	1.74517e-08	ectonucleotide pyrophosphatase/phosphodiesterase 2 [Source:HGNC Symbol;Acc:HGNC:3357]	ENPP2	Q13822	ENSG00000136960
Organismal Systems	Immune system	Complement and coagulation cascades	complement factor B	K01335 CFB; complement factor B [EC:3.4.21.47]	6.848	2.776	No	3.105e-05	complement factor B [Source:HGNC Symbol;Acc:HGNC:1037]	CFB	P00751	ENSG00000239754
Environmental Information Processing	Signaling molecules and interaction	Neuroactive ligand-receptor interaction	pyrimidinergic receptor P2Y6	K04272 P2RY6; P2Y purinoceptor 6	6.71	2.746	No	6.16395e-17	pyrimidinergic receptor P2Y, G-protein coupled, 6 [Source:HGNC Symbol;Acc:HGNC:8543]	P2RY6	Q15077	ENSG00000171631
Not Included in Pathway or Brite	Unclassified: signaling and cellular processes	Signaling proteins	guanylate binding protein family member 6	K20908 GBP6; guanylate-binding protein 6	6.611	2.725	No	0.00116264	guanylate binding protein family member 6 [Source:HGNC Symbol;Acc:HGNC:25395]	GBP6	Q6ZN66	ENSG00000183347
Environmental Information Processing	Signal transduction	HIF-1 signaling pathway	lactate dehydrogenase A like 6B	K00016 LDH; L-lactate dehydrogenase [EC:1.1.1.27]	6.523	2.706	No	0.0273536	lactate dehydrogenase A-like 6B [Source:HGNC Symbol;Acc:HGNC:21481]	LDHAL6B	Q9BYZ2	ENSG00000171989
Metabolism	Amino acid metabolism	Cysteine and methionine metabolism	lactate dehydrogenase A like 6B	K00016 LDH; L-lactate dehydrogenase [EC:1.1.1.27]	6.523	2.706	No	0.0273536	lactate dehydrogenase A-like 6B [Source:HGNC Symbol;Acc:HGNC:21481]	LDHAL6B	Q9BYZ2	ENSG00000171989
Metabolism	Carbohydrate metabolism	Glycolysis / Gluconeogenesis	lactate dehydrogenase A like 6B	K00016 LDH; L-lactate dehydrogenase [EC:1.1.1.27]	6.523	2.706	No	0.0273536	lactate dehydrogenase A-like 6B [Source:HGNC Symbol;Acc:HGNC:21481]	LDHAL6B	Q9BYZ2	ENSG00000171989
Metabolism	Carbohydrate metabolism	Propanoate metabolism	lactate dehydrogenase A like 6B	K00016 LDH; L-lactate dehydrogenase [EC:1.1.1.27]	6.523	2.706	No	0.0273536	lactate dehydrogenase A-like 6B [Source:HGNC Symbol;Acc:HGNC:21481]	LDHAL6B	Q9BYZ2	ENSG00000171989
Metabolism	Carbohydrate metabolism	Pyruvate metabolism	lactate dehydrogenase A like 6B	K00016 LDH; L-lactate dehydrogenase [EC:1.1.1.27]	6.523	2.706	No	0.0273536	lactate dehydrogenase A-like 6B [Source:HGNC Symbol;Acc:HGNC:21481]	LDHAL6B	Q9BYZ2	ENSG00000171989
Organismal Systems	Endocrine system	Glucagon signaling pathway	lactate dehydrogenase A like 6B	K00016 LDH; L-lactate dehydrogenase [EC:1.1.1.27]	6.523	2.706	No	0.0273536	lactate dehydrogenase A-like 6B [Source:HGNC Symbol;Acc:HGNC:21481]	LDHAL6B	Q9BYZ2	ENSG00000171989
Organismal Systems	Digestive system	Pancreatic secretion	RAB27B, member RAS oncogene family	K07886 RAB27B; Ras-related protein Rab-27B	6.49	2.698	No	2.457e-30	RAB27B, member RAS oncogene family [Source:HGNC Symbol;Acc:HGNC:9767]	RAB27B	O00194	ENSG00000041353
Environmental Information Processing	Signaling molecules and interaction	Cytokine-cytokine receptor interaction	C-C motif chemokine receptor 1	K04176 CCR1; C-C chemokine receptor type 1	6.421	2.683	No	0.0014784	chemokine (C-C motif) receptor 1 [Source:HGNC Symbol;Acc:HGNC:1602]	CCR1	P32246	ENSG00000163823
Environmental Information Processing	Signaling molecules and interaction	Viral protein interaction with cytokine and cytokine receptor	C-C motif chemokine receptor 1	K04176 CCR1; C-C chemokine receptor type 1	6.421	2.683	No	0.0014784	chemokine (C-C motif) receptor 1 [Source:HGNC Symbol;Acc:HGNC:1602]	CCR1	P32246	ENSG00000163823
Organismal Systems	Immune system	Chemokine signaling pathway	C-C motif chemokine receptor 1	K04176 CCR1; C-C chemokine receptor type 1	6.421	2.683	No	0.0014784	chemokine (C-C motif) receptor 1 [Source:HGNC Symbol;Acc:HGNC:1602]	CCR1	P32246	ENSG00000163823
Organismal Systems	Immune system	NOD-like receptor signaling pathway	guanylate binding protein 2	K20897 GBP2; guanylate-binding protein 2	6.361	2.669	No	2.55269e-38	guanylate binding protein 2, interferon-inducible [Source:HGNC Symbol;Acc:HGNC:4183]	GBP2	P32456	ENSG00000162645
Environmental Information Processing	Signaling molecules and interaction	Cytokine-cytokine receptor interaction	interleukin 34	K22633 IL34; interleukin 34	6.29	2.653	No	0.00488601	interleukin 34 [Source:HGNC Symbol;Acc:HGNC:28529]	IL34	Q6ZMJ4	ENSG00000157368
Environmental Information Processing	Signaling molecules and interaction	Viral protein interaction with cytokine and cytokine receptor	interleukin 34	K22633 IL34; interleukin 34	6.29	2.653	No	0.00488601	interleukin 34 [Source:HGNC Symbol;Acc:HGNC:28529]	IL34	Q6ZMJ4	ENSG00000157368
Not Included in Pathway or Brite	Unclassified: signaling and cellular processes	Signaling proteins	phosducin	K08327 PDC; phosducin	6.271	2.649	No	2.27647e-05	phosducin [Source:HGNC Symbol;Acc:HGNC:8759]	PDC	P20941	ENSG00000116703
Metabolism	Lipid metabolism	Primary bile acid biosynthesis	cholesterol 25-hydroxylase	K10223 CH25H; cholesterol 25-hydroxylase [EC:1.14.99.38]	6.257	2.645	No	0.00335562	cholesterol 25-hydroxylase [Source:HGNC Symbol;Acc:HGNC:1907]	CH25H	O95992	ENSG00000138135
Organismal Systems	Immune system	Chemokine signaling pathway	engulfment and cell motility 1	K12366 ELMO1; engulfment and cell motility protein 1	5.956	2.574	No	1.45237e-05	engulfment and cell motility 1 [Source:HGNC Symbol;Acc:HGNC:16286]	ELMO1	Q92556	ENSG00000155849
Cellular Processes	Cellular community - eukaryotes	Gap junction	5-hydroxytryptamine receptor 2A	K04157 HTR2; 5-hydroxytryptamine receptor 2	5.883	2.557	No	0.00441606	5-hydroxytryptamine (serotonin) receptor 2A, G protein-coupled [Source:HGNC Symbol;Acc:HGNC:5293]	HTR2A	P28223	ENSG00000102468
Environmental Information Processing	Signal transduction	Calcium signaling pathway	5-hydroxytryptamine receptor 2A	K04157 HTR2; 5-hydroxytryptamine receptor 2	5.883	2.557	No	0.00441606	5-hydroxytryptamine (serotonin) receptor 2A, G protein-coupled [Source:HGNC Symbol;Acc:HGNC:5293]	HTR2A	P28223	ENSG00000102468
Environmental Information Processing	Signaling molecules and interaction	Neuroactive ligand-receptor interaction	5-hydroxytryptamine receptor 2A	K04157 HTR2; 5-hydroxytryptamine receptor 2	5.883	2.557	No	0.00441606	5-hydroxytryptamine (serotonin) receptor 2A, G protein-coupled [Source:HGNC Symbol;Acc:HGNC:5293]	HTR2A	P28223	ENSG00000102468
Organismal Systems	Nervous system	Serotonergic synapse	5-hydroxytryptamine receptor 2A	K04157 HTR2; 5-hydroxytryptamine receptor 2	5.883	2.557	No	0.00441606	5-hydroxytryptamine (serotonin) receptor 2A, G protein-coupled [Source:HGNC Symbol;Acc:HGNC:5293]	HTR2A	P28223	ENSG00000102468
Organismal Systems	Sensory system	Inflammatory mediator regulation of TRP channels	5-hydroxytryptamine receptor 2A	K04157 HTR2; 5-hydroxytryptamine receptor 2	5.883	2.557	No	0.00441606	5-hydroxytryptamine (serotonin) receptor 2A, G protein-coupled [Source:HGNC Symbol;Acc:HGNC:5293]	HTR2A	P28223	ENSG00000102468
Metabolism	Metabolism of cofactors and vitamins	Nicotinate and nicotinamide metabolism	nicotinamide N-methyltransferase	K00541 NNMT; nicotinamide N-methyltransferase [EC:2.1.1.1]	5.859	2.551	No	3.3078e-17	nicotinamide N-methyltransferase [Source:HGNC Symbol;Acc:HGNC:7861]	NNMT	P40261	ENSG00000166741
Metabolism	Glycan biosynthesis and metabolism	Mucin type O-glycan biosynthesis	glucosaminyl (N-acetyl) transferase 3, mucin type	K09662 GCNT3; N-acetylglucosaminyltransferase 3, mucin type [EC:2.4.1.-]	5.822	2.542	No	3.22832e-08	glucosaminyl (N-acetyl) transferase 3, mucin type [Source:HGNC Symbol;Acc:HGNC:4205]	GCNT3	O95395	ENSG00000140297
Environmental Information Processing	Signal transduction	TNF signaling pathway	C-C motif chemokine ligand 5	K12499 CCL5; C-C motif chemokine 5	5.712	2.514	No	0.00502862	chemokine (C-C motif) ligand 5 [Source:HGNC Symbol;Acc:HGNC:10632]	CCL5	P13501	ENSG00000271503
Environmental Information Processing	Signaling molecules and interaction	Cytokine-cytokine receptor interaction	C-C motif chemokine ligand 5	K12499 CCL5; C-C motif chemokine 5	5.712	2.514	No	0.00502862	chemokine (C-C motif) ligand 5 [Source:HGNC Symbol;Acc:HGNC:10632]	CCL5	P13501	ENSG00000271503
Environmental Information Processing	Signaling molecules and interaction	Viral protein interaction with cytokine and cytokine receptor	C-C motif chemokine ligand 5	K12499 CCL5; C-C motif chemokine 5	5.712	2.514	No	0.00502862	chemokine (C-C motif) ligand 5 [Source:HGNC Symbol;Acc:HGNC:10632]	CCL5	P13501	ENSG00000271503
Organismal Systems	Immune system	Chemokine signaling pathway	C-C motif chemokine ligand 5	K12499 CCL5; C-C motif chemokine 5	5.712	2.514	No	0.00502862	chemokine (C-C motif) ligand 5 [Source:HGNC Symbol;Acc:HGNC:10632]	CCL5	P13501	ENSG00000271503
Organismal Systems	Immune system	Cytosolic DNA-sensing pathway	C-C motif chemokine ligand 5	K12499 CCL5; C-C motif chemokine 5	5.712	2.514	No	0.00502862	chemokine (C-C motif) ligand 5 [Source:HGNC Symbol;Acc:HGNC:10632]	CCL5	P13501	ENSG00000271503
Organismal Systems	Immune system	NOD-like receptor signaling pathway	C-C motif chemokine ligand 5	K12499 CCL5; C-C motif chemokine 5	5.712	2.514	No	0.00502862	chemokine (C-C motif) ligand 5 [Source:HGNC Symbol;Acc:HGNC:10632]	CCL5	P13501	ENSG00000271503
Organismal Systems	Immune system	Toll-like receptor signaling pathway	C-C motif chemokine ligand 5	K12499 CCL5; C-C motif chemokine 5	5.712	2.514	No	0.00502862	chemokine (C-C motif) ligand 5 [Source:HGNC Symbol;Acc:HGNC:10632]	CCL5	P13501	ENSG00000271503
Organismal Systems	Environmental adaptation	Circadian entrainment	ras related dexamethasone induced 1	K07843 RASD1; RAS, dexamethasone-induced Ras-related protein 1	5.558	2.474	No	4.93632e-05	RAS, dexamethasone-induced 1 [Source:HGNC Symbol;Acc:HGNC:15828]	RASD1	Q9Y272	ENSG00000108551
Cellular Processes	Cell motility	Regulation of actin cytoskeleton	bradykinin receptor B1	K03915 BDKRB1; bradykinin receptor B1	5.55	2.472	No	5.06043e-16	bradykinin receptor B1 [Source:HGNC Symbol;Acc:HGNC:1029]	BDKRB1	P46663	ENSG00000100739
Environmental Information Processing	Signal transduction	Calcium signaling pathway	bradykinin receptor B1	K03915 BDKRB1; bradykinin receptor B1	5.55	2.472	No	5.06043e-16	bradykinin receptor B1 [Source:HGNC Symbol;Acc:HGNC:1029]	BDKRB1	P46663	ENSG00000100739
Environmental Information Processing	Signaling molecules and interaction	Neuroactive ligand-receptor interaction	bradykinin receptor B1	K03915 BDKRB1; bradykinin receptor B1	5.55	2.472	No	5.06043e-16	bradykinin receptor B1 [Source:HGNC Symbol;Acc:HGNC:1029]	BDKRB1	P46663	ENSG00000100739
Organismal Systems	Immune system	Complement and coagulation cascades	bradykinin receptor B1	K03915 BDKRB1; bradykinin receptor B1	5.55	2.472	No	5.06043e-16	bradykinin receptor B1 [Source:HGNC Symbol;Acc:HGNC:1029]	BDKRB1	P46663	ENSG00000100739
Organismal Systems	Sensory system	Inflammatory mediator regulation of TRP channels	bradykinin receptor B1	K03915 BDKRB1; bradykinin receptor B1	5.55	2.472	No	5.06043e-16	bradykinin receptor B1 [Source:HGNC Symbol;Acc:HGNC:1029]	BDKRB1	P46663	ENSG00000100739
Metabolism	Metabolism of cofactors and vitamins	Nicotinate and nicotinamide metabolism	nicotinamide phosphoribosyltransferase	K03462 NAMPT; nicotinamide phosphoribosyltransferase [EC:2.4.2.12]	5.507	2.461	No	6.98829e-56	nicotinamide phosphoribosyltransferase [Source:HGNC Symbol;Acc:HGNC:30092]	NAMPT	P43490	ENSG00000105835
Organismal Systems	Immune system	NOD-like receptor signaling pathway	nicotinamide phosphoribosyltransferase	K03462 NAMPT; nicotinamide phosphoribosyltransferase [EC:2.4.2.12]	5.507	2.461	No	6.98829e-56	nicotinamide phosphoribosyltransferase [Source:HGNC Symbol;Acc:HGNC:30092]	NAMPT	P43490	ENSG00000105835
Cellular Processes	Cell growth and death	Necroptosis	TNF alpha induced protein 3	K11859 TNFAIP3; tumor necrosis factor, alpha-induced protein 3 [EC:3.4.19.12]	5.467	2.451	No	2.36668e-15	TNF alpha induced protein 3 [Source:HGNC Symbol;Acc:HGNC:11896]	TNFAIP3	P21580	ENSG00000118503
Environmental Information Processing	Signal transduction	NF-kappa B signaling pathway	TNF alpha induced protein 3	K11859 TNFAIP3; tumor necrosis factor, alpha-induced protein 3 [EC:3.4.19.12]	5.467	2.451	No	2.36668e-15	TNF alpha induced protein 3 [Source:HGNC Symbol;Acc:HGNC:11896]	TNFAIP3	P21580	ENSG00000118503
Environmental Information Processing	Signal transduction	TNF signaling pathway	TNF alpha induced protein 3	K11859 TNFAIP3; tumor necrosis factor, alpha-induced protein 3 [EC:3.4.19.12]	5.467	2.451	No	2.36668e-15	TNF alpha induced protein 3 [Source:HGNC Symbol;Acc:HGNC:11896]	TNFAIP3	P21580	ENSG00000118503
Organismal Systems	Immune system	IL-17 signaling pathway	TNF alpha induced protein 3	K11859 TNFAIP3; tumor necrosis factor, alpha-induced protein 3 [EC:3.4.19.12]	5.467	2.451	No	2.36668e-15	TNF alpha induced protein 3 [Source:HGNC Symbol;Acc:HGNC:11896]	TNFAIP3	P21580	ENSG00000118503
Organismal Systems	Immune system	NOD-like receptor signaling pathway	TNF alpha induced protein 3	K11859 TNFAIP3; tumor necrosis factor, alpha-induced protein 3 [EC:3.4.19.12]	5.467	2.451	No	2.36668e-15	TNF alpha induced protein 3 [Source:HGNC Symbol;Acc:HGNC:11896]	TNFAIP3	P21580	ENSG00000118503
Environmental Information Processing	Signaling molecules and interaction	Neuroactive ligand-receptor interaction	tachykinin precursor 3	K05240 TAC2_3; tachykinin 2/3	5.396	2.432	No	3.12172e-14	tachykinin 3 [Source:HGNC Symbol;Acc:HGNC:11521]	TAC3	Q9UHF0	ENSG00000166863
Organismal Systems	Digestive system	Carbohydrate digestion and absorption	solute carrier family 2 member 5	K08143 SLC2A5; MFS transporter, SP family, solute carrier family 2 (facilitated glucose/fructose transporter), member 5	5.203	2.379	No	5.83337e-20	solute carrier family 2 (facilitated glucose/fructose transporter), member 5 [Source:HGNC Symbol;Acc:HGNC:11010]	SLC2A5	P22732	ENSG00000142583
Metabolism	Lipid metabolism	Steroid hormone biosynthesis	aldo-keto reductase family 1 member C1	K00212 AKR1C1; 20alpha/3alpha-hydroxysteroid dehydrogenase / dihydrodiol dehydrogenase [EC:1.1.1.149 1.1.1.357 1.3.1.20]	5.074	2.343	No	0.0444603	aldo-keto reductase family 1, member C1 [Source:HGNC Symbol;Acc:HGNC:384]	AKR1C1	Q04828	ENSG00000187134
Metabolism	Xenobiotics biodegradation and metabolism	Metabolism of xenobiotics by cytochrome P450	aldo-keto reductase family 1 member C1	K00212 AKR1C1; 20alpha/3alpha-hydroxysteroid dehydrogenase / dihydrodiol dehydrogenase [EC:1.1.1.149 1.1.1.357 1.3.1.20]	5.074	2.343	No	0.0444603	aldo-keto reductase family 1, member C1 [Source:HGNC Symbol;Acc:HGNC:384]	AKR1C1	Q04828	ENSG00000187134
Organismal Systems	Digestive system	Mineral absorption	metallothionein 1X	K14739 MT1_2; metallothionein 1/2	5.022	2.328	No	1.98239e-19	metallothionein 1X [Source:HGNC Symbol;Acc:HGNC:7405]	MT1X	P80297	ENSG00000187193
Environmental Information Processing	Signal transduction	ErbB signaling pathway	transforming growth factor alpha	K08774 TGFA; transforming growth factor, alpha	4.949	2.307	No	0.00326071	transforming growth factor alpha [Source:HGNC Symbol;Acc:HGNC:11765]	TGFA	P01135	ENSG00000163235
Environmental Information Processing	Signal transduction	MAPK signaling pathway	transforming growth factor alpha	K08774 TGFA; transforming growth factor, alpha	4.949	2.307	No	0.00326071	transforming growth factor alpha [Source:HGNC Symbol;Acc:HGNC:11765]	TGFA	P01135	ENSG00000163235
Environmental Information Processing	Signal transduction	PI3K-Akt signaling pathway	transforming growth factor alpha	K08774 TGFA; transforming growth factor, alpha	4.949	2.307	No	0.00326071	transforming growth factor alpha [Source:HGNC Symbol;Acc:HGNC:11765]	TGFA	P01135	ENSG00000163235
Environmental Information Processing	Signal transduction	Ras signaling pathway	transforming growth factor alpha	K08774 TGFA; transforming growth factor, alpha	4.949	2.307	No	0.00326071	transforming growth factor alpha [Source:HGNC Symbol;Acc:HGNC:11765]	TGFA	P01135	ENSG00000163235
Organismal Systems	Endocrine system	Estrogen signaling pathway	transforming growth factor alpha	K08774 TGFA; transforming growth factor, alpha	4.949	2.307	No	0.00326071	transforming growth factor alpha [Source:HGNC Symbol;Acc:HGNC:11765]	TGFA	P01135	ENSG00000163235
Not Included in Pathway or Brite	Unclassified: signaling and cellular processes	Structural proteins	junctophilin 1	K19530 JPH; junctophilin	4.94	2.304	No	0.000338012	junctophilin 1 [Source:HGNC Symbol;Acc:HGNC:14201]	JPH1	Q9HDC5	ENSG00000104369
Organismal Systems	Nervous system	GABAergic synapse	phospholipase C like 1 (inactive)	K15375 PLCL1; inactive phospholipase C-like protein 1	4.815	2.267	No	1.38494e-05	phospholipase C like 1 [Source:HGNC Symbol;Acc:HGNC:9063]	PLCL1	Q15111	ENSG00000115896
Cellular Processes	Transport and catabolism	Phagosome	major histocompatibility complex, class II, DP beta 1	K06752 MHC2; MHC class II antigen	4.797	2.262	No	4.65134e-09	major histocompatibility complex, class II, DP beta 1 [Source:HGNC Symbol;Acc:HGNC:4940]	HLA-DPB1		ENSG00000230708
Environmental Information Processing	Signaling molecules and interaction	Cell adhesion molecules	major histocompatibility complex, class II, DP beta 1	K06752 MHC2; MHC class II antigen	4.797	2.262	No	4.65134e-09	major histocompatibility complex, class II, DP beta 1 [Source:HGNC Symbol;Acc:HGNC:4940]	HLA-DPB1		ENSG00000230708
Organismal Systems	Immune system	Antigen processing and presentation	major histocompatibility complex, class II, DP beta 1	K06752 MHC2; MHC class II antigen	4.797	2.262	No	4.65134e-09	major histocompatibility complex, class II, DP beta 1 [Source:HGNC Symbol;Acc:HGNC:4940]	HLA-DPB1		ENSG00000230708
Organismal Systems	Immune system	Hematopoietic cell lineage	major histocompatibility complex, class II, DP beta 1	K06752 MHC2; MHC class II antigen	4.797	2.262	No	4.65134e-09	major histocompatibility complex, class II, DP beta 1 [Source:HGNC Symbol;Acc:HGNC:4940]	HLA-DPB1		ENSG00000230708
Organismal Systems	Immune system	Intestinal immune network for IgA production	major histocompatibility complex, class II, DP beta 1	K06752 MHC2; MHC class II antigen	4.797	2.262	No	4.65134e-09	major histocompatibility complex, class II, DP beta 1 [Source:HGNC Symbol;Acc:HGNC:4940]	HLA-DPB1		ENSG00000230708
Organismal Systems	Immune system	Th1 and Th2 cell differentiation	major histocompatibility complex, class II, DP beta 1	K06752 MHC2; MHC class II antigen	4.797	2.262	No	4.65134e-09	major histocompatibility complex, class II, DP beta 1 [Source:HGNC Symbol;Acc:HGNC:4940]	HLA-DPB1		ENSG00000230708
Organismal Systems	Immune system	Th17 cell differentiation	major histocompatibility complex, class II, DP beta 1	K06752 MHC2; MHC class II antigen	4.797	2.262	No	4.65134e-09	major histocompatibility complex, class II, DP beta 1 [Source:HGNC Symbol;Acc:HGNC:4940]	HLA-DPB1		ENSG00000230708
Environmental Information Processing	Signaling molecules and interaction	Cytokine-cytokine receptor interaction	C-C motif chemokine ligand 26	K21096 CCL26; C-C motif chemokine 26	4.714	2.237	No	7.2527e-08	chemokine (C-C motif) ligand 26 [Source:HGNC Symbol;Acc:HGNC:10625]	CCL26	Q9Y258	ENSG00000006606
Environmental Information Processing	Signaling molecules and interaction	Viral protein interaction with cytokine and cytokine receptor	C-C motif chemokine ligand 26	K21096 CCL26; C-C motif chemokine 26	4.714	2.237	No	7.2527e-08	chemokine (C-C motif) ligand 26 [Source:HGNC Symbol;Acc:HGNC:10625]	CCL26	Q9Y258	ENSG00000006606
Organismal Systems	Immune system	Chemokine signaling pathway	C-C motif chemokine ligand 26	K21096 CCL26; C-C motif chemokine 26	4.714	2.237	No	7.2527e-08	chemokine (C-C motif) ligand 26 [Source:HGNC Symbol;Acc:HGNC:10625]	CCL26	Q9Y258	ENSG00000006606
Organismal Systems	Environmental adaptation	Circadian rhythm	basic helix-loop-helix family member e40	K03729 BHLHB2; class B basic helix-loop-helix protein 2	4.632	2.212	No	5.5031e-11	basic helix-loop-helix family member e40 [Source:HGNC Symbol;Acc:HGNC:1046]	BHLHE40	O14503	ENSG00000134107
Environmental Information Processing	Signal transduction	Calcium signaling pathway	prostaglandin E receptor 1	K04258 PTGER1; prostaglandin E receptor 1	4.626	2.21	No	0.025878	prostaglandin E receptor 1 [Source:HGNC Symbol;Acc:HGNC:9593]	PTGER1	P34995	ENSG00000160951
Environmental Information Processing	Signaling molecules and interaction	Neuroactive ligand-receptor interaction	prostaglandin E receptor 1	K04258 PTGER1; prostaglandin E receptor 1	4.626	2.21	No	0.025878	prostaglandin E receptor 1 [Source:HGNC Symbol;Acc:HGNC:9593]	PTGER1	P34995	ENSG00000160951
Cellular Processes	Cellular community - eukaryotes	Focal adhesion	Ras protein specific guanine nucleotide releasing factor 1	K04349 RASGRF1; Ras-specific guanine nucleotide-releasing factor 1	4.623	2.209	No	0.00634239	Ras protein specific guanine nucleotide releasing factor 1 [Source:HGNC Symbol;Acc:HGNC:9875]	RASGRF1	Q13972	ENSG00000058335
Environmental Information Processing	Signal transduction	MAPK signaling pathway	Ras protein specific guanine nucleotide releasing factor 1	K04349 RASGRF1; Ras-specific guanine nucleotide-releasing factor 1	4.623	2.209	No	0.00634239	Ras protein specific guanine nucleotide releasing factor 1 [Source:HGNC Symbol;Acc:HGNC:9875]	RASGRF1	Q13972	ENSG00000058335
Environmental Information Processing	Signal transduction	Ras signaling pathway	Ras protein specific guanine nucleotide releasing factor 1	K04349 RASGRF1; Ras-specific guanine nucleotide-releasing factor 1	4.623	2.209	No	0.00634239	Ras protein specific guanine nucleotide releasing factor 1 [Source:HGNC Symbol;Acc:HGNC:9875]	RASGRF1	Q13972	ENSG00000058335
Not Included in Pathway or Brite	Unclassified: metabolism	Enzymes with EC numbers	ATPase phospholipid transporting 8B4 (putative)	K01530 E7.6.2.1; phospholipid-translocating ATPase [EC:7.6.2.1]	4.602	2.202	No	8.00776e-16	ATPase, class I, type 8B, member 4 [Source:HGNC Symbol;Acc:HGNC:13536]	ATP8B4	Q8TF62	ENSG00000104043
Environmental Information Processing	Signal transduction	NF-kappa B signaling pathway	TNF superfamily member 13b	K05476 TNFSF13B; tumor necrosis factor ligand superfamily member 13B	4.58	2.195	No	2.23924e-23	tumor necrosis factor superfamily member 13b [Source:HGNC Symbol;Acc:HGNC:11929]	TNFSF13B	Q9Y275	ENSG00000102524
Environmental Information Processing	Signaling molecules and interaction	Cytokine-cytokine receptor interaction	TNF superfamily member 13b	K05476 TNFSF13B; tumor necrosis factor ligand superfamily member 13B	4.58	2.195	No	2.23924e-23	tumor necrosis factor superfamily member 13b [Source:HGNC Symbol;Acc:HGNC:11929]	TNFSF13B	Q9Y275	ENSG00000102524
Organismal Systems	Immune system	Intestinal immune network for IgA production	TNF superfamily member 13b	K05476 TNFSF13B; tumor necrosis factor ligand superfamily member 13B	4.58	2.195	No	2.23924e-23	tumor necrosis factor superfamily member 13b [Source:HGNC Symbol;Acc:HGNC:11929]	TNFSF13B	Q9Y275	ENSG00000102524
Environmental Information Processing	Signaling molecules and interaction	Cytokine-cytokine receptor interaction	TNF superfamily member 9	K05472 TNFSF9; tumor necrosis factor ligand superfamily member 9	4.532	2.18	No	8.34367e-33	tumor necrosis factor superfamily member 9 [Source:HGNC Symbol;Acc:HGNC:11939]	TNFSF9	P41273	ENSG00000125657
Organismal Systems	Endocrine system	PPAR signaling pathway	perilipin 2	K17284 PLIN2; perilipin-2	4.461	2.157	No	2.41629e-23	perilipin 2 [Source:HGNC Symbol;Acc:HGNC:248]	PLIN2	Q99541	ENSG00000147872
Environmental Information Processing	Signal transduction	FoxO signaling pathway	serum/glucocorticoid regulated kinase 1	K13302 SGK1; serum/glucocorticoid-regulated kinase 1 [EC:2.7.11.1]	4.45	2.154	No	2.76414e-26	serum/glucocorticoid regulated kinase 1 [Source:HGNC Symbol;Acc:HGNC:10810]	SGK1	O00141	ENSG00000118515
Environmental Information Processing	Signal transduction	mTOR signaling pathway	serum/glucocorticoid regulated kinase 1	K13302 SGK1; serum/glucocorticoid-regulated kinase 1 [EC:2.7.11.1]	4.45	2.154	No	2.76414e-26	serum/glucocorticoid regulated kinase 1 [Source:HGNC Symbol;Acc:HGNC:10810]	SGK1	O00141	ENSG00000118515
Environmental Information Processing	Signal transduction	PI3K-Akt signaling pathway	serum/glucocorticoid regulated kinase 1	K13302 SGK1; serum/glucocorticoid-regulated kinase 1 [EC:2.7.11.1]	4.45	2.154	No	2.76414e-26	serum/glucocorticoid regulated kinase 1 [Source:HGNC Symbol;Acc:HGNC:10810]	SGK1	O00141	ENSG00000118515
Organismal Systems	Excretory system	Aldosterone-regulated sodium reabsorption	serum/glucocorticoid regulated kinase 1	K13302 SGK1; serum/glucocorticoid-regulated kinase 1 [EC:2.7.11.1]	4.45	2.154	No	2.76414e-26	serum/glucocorticoid regulated kinase 1 [Source:HGNC Symbol;Acc:HGNC:10810]	SGK1	O00141	ENSG00000118515
Organismal Systems	Sensory system	Olfactory transduction	anoctamin 2	K19497 ANO2; anoctamin-2	4.383	2.132	No	2.79707e-05	anoctamin 2, calcium activated chloride channel [Source:HGNC Symbol;Acc:HGNC:1183]	ANO2	Q9NQ90	ENSG00000047617
Metabolism	Carbohydrate metabolism	Starch and sucrose metabolism	phosphoglucomutase 2 like 1	K11809 PGM2L1; glucose-1,6-bisphosphate synthase [EC:2.7.1.106]	4.374	2.129	No	9.5469e-19	phosphoglucomutase 2-like 1 [Source:HGNC Symbol;Acc:HGNC:20898]	PGM2L1	Q6PCE3	ENSG00000165434
Environmental Information Processing	Signal transduction	Notch signaling pathway	hes family bHLH transcription factor 1	K06054 HES1; hairy and enhancer of split 1	4.325	2.113	No	3.01426e-15	hes family bHLH transcription factor 1 [Source:HGNC Symbol;Acc:HGNC:5192]	HES1	Q14469	ENSG00000114315
Genetic Information Processing	Replication and repair	Fanconi anemia pathway	hes family bHLH transcription factor 1	K06054 HES1; hairy and enhancer of split 1	4.325	2.113	No	3.01426e-15	hes family bHLH transcription factor 1 [Source:HGNC Symbol;Acc:HGNC:5192]	HES1	Q14469	ENSG00000114315
Cellular Processes	Transport and catabolism	Endocytosis	heat shock protein family A (Hsp70) member 2	K03283 HSPA1s; heat shock 70kDa protein 1/2/6/8	4.278	2.097	No	0.00399068	heat shock protein family A (Hsp70) member 2 [Source:HGNC Symbol;Acc:HGNC:5235]	HSPA2	P54652	ENSG00000126803
Environmental Information Processing	Signal transduction	MAPK signaling pathway	heat shock protein family A (Hsp70) member 2	K03283 HSPA1s; heat shock 70kDa protein 1/2/6/8	4.278	2.097	No	0.00399068	heat shock protein family A (Hsp70) member 2 [Source:HGNC Symbol;Acc:HGNC:5235]	HSPA2	P54652	ENSG00000126803
Genetic Information Processing	Folding, sorting and degradation	Protein processing in endoplasmic reticulum	heat shock protein family A (Hsp70) member 2	K03283 HSPA1s; heat shock 70kDa protein 1/2/6/8	4.278	2.097	No	0.00399068	heat shock protein family A (Hsp70) member 2 [Source:HGNC Symbol;Acc:HGNC:5235]	HSPA2	P54652	ENSG00000126803
Genetic Information Processing	Transcription	Spliceosome	heat shock protein family A (Hsp70) member 2	K03283 HSPA1s; heat shock 70kDa protein 1/2/6/8	4.278	2.097	No	0.00399068	heat shock protein family A (Hsp70) member 2 [Source:HGNC Symbol;Acc:HGNC:5235]	HSPA2	P54652	ENSG00000126803
Organismal Systems	Aging	Longevity regulating pathway - multiple species	heat shock protein family A (Hsp70) member 2	K03283 HSPA1s; heat shock 70kDa protein 1/2/6/8	4.278	2.097	No	0.00399068	heat shock protein family A (Hsp70) member 2 [Source:HGNC Symbol;Acc:HGNC:5235]	HSPA2	P54652	ENSG00000126803
Organismal Systems	Endocrine system	Estrogen signaling pathway	heat shock protein family A (Hsp70) member 2	K03283 HSPA1s; heat shock 70kDa protein 1/2/6/8	4.278	2.097	No	0.00399068	heat shock protein family A (Hsp70) member 2 [Source:HGNC Symbol;Acc:HGNC:5235]	HSPA2	P54652	ENSG00000126803
Organismal Systems	Immune system	Antigen processing and presentation	heat shock protein family A (Hsp70) member 2	K03283 HSPA1s; heat shock 70kDa protein 1/2/6/8	4.278	2.097	No	0.00399068	heat shock protein family A (Hsp70) member 2 [Source:HGNC Symbol;Acc:HGNC:5235]	HSPA2	P54652	ENSG00000126803
Cellular Processes	Cellular community - eukaryotes	Focal adhesion	vitronectin	K06251 VTN; vitronectin	4.276	2.096	No	0.00970358	vitronectin [Source:HGNC Symbol;Acc:HGNC:12724]	VTN	P04004	ENSG00000109072
Environmental Information Processing	Signal transduction	PI3K-Akt signaling pathway	vitronectin	K06251 VTN; vitronectin	4.276	2.096	No	0.00970358	vitronectin [Source:HGNC Symbol;Acc:HGNC:12724]	VTN	P04004	ENSG00000109072
Environmental Information Processing	Signaling molecules and interaction	ECM-receptor interaction	vitronectin	K06251 VTN; vitronectin	4.276	2.096	No	0.00970358	vitronectin [Source:HGNC Symbol;Acc:HGNC:12724]	VTN	P04004	ENSG00000109072
Organismal Systems	Immune system	Complement and coagulation cascades	vitronectin	K06251 VTN; vitronectin	4.276	2.096	No	0.00970358	vitronectin [Source:HGNC Symbol;Acc:HGNC:12724]	VTN	P04004	ENSG00000109072
Metabolism	Lipid metabolism	Arachidonic acid metabolism	cytochrome P450 family 2 subfamily J member 2	K07418 CYP2J; cytochrome P450 family 2 subfamily J [EC:1.14.14.1 1.14.14.73 1.14.14.74 1.14.14.75]	4.27	2.094	No	0.0221777	cytochrome P450 family 2 subfamily J member 2 [Source:HGNC Symbol;Acc:HGNC:2634]	CYP2J2	P51589	ENSG00000134716
Metabolism	Lipid metabolism	Linoleic acid metabolism	cytochrome P450 family 2 subfamily J member 2	K07418 CYP2J; cytochrome P450 family 2 subfamily J [EC:1.14.14.1 1.14.14.73 1.14.14.74 1.14.14.75]	4.27	2.094	No	0.0221777	cytochrome P450 family 2 subfamily J member 2 [Source:HGNC Symbol;Acc:HGNC:2634]	CYP2J2	P51589	ENSG00000134716
Organismal Systems	Endocrine system	Ovarian steroidogenesis	cytochrome P450 family 2 subfamily J member 2	K07418 CYP2J; cytochrome P450 family 2 subfamily J [EC:1.14.14.1 1.14.14.73 1.14.14.74 1.14.14.75]	4.27	2.094	No	0.0221777	cytochrome P450 family 2 subfamily J member 2 [Source:HGNC Symbol;Acc:HGNC:2634]	CYP2J2	P51589	ENSG00000134716
Organismal Systems	Nervous system	Serotonergic synapse	cytochrome P450 family 2 subfamily J member 2	K07418 CYP2J; cytochrome P450 family 2 subfamily J [EC:1.14.14.1 1.14.14.73 1.14.14.74 1.14.14.75]	4.27	2.094	No	0.0221777	cytochrome P450 family 2 subfamily J member 2 [Source:HGNC Symbol;Acc:HGNC:2634]	CYP2J2	P51589	ENSG00000134716
Organismal Systems	Sensory system	Inflammatory mediator regulation of TRP channels	cytochrome P450 family 2 subfamily J member 2	K07418 CYP2J; cytochrome P450 family 2 subfamily J [EC:1.14.14.1 1.14.14.73 1.14.14.74 1.14.14.75]	4.27	2.094	No	0.0221777	cytochrome P450 family 2 subfamily J member 2 [Source:HGNC Symbol;Acc:HGNC:2634]	CYP2J2	P51589	ENSG00000134716
Cellular Processes	Cell motility	Regulation of actin cytoskeleton	integrin subunit beta 8	K06591 ITGB8; integrin beta 8	4.253	2.089	No	3.25158e-08	integrin subunit beta 8 [Source:HGNC Symbol;Acc:HGNC:6163]	ITGB8	P26012	ENSG00000105855
Cellular Processes	Cellular community - eukaryotes	Focal adhesion	integrin subunit beta 8	K06591 ITGB8; integrin beta 8	4.253	2.089	No	3.25158e-08	integrin subunit beta 8 [Source:HGNC Symbol;Acc:HGNC:6163]	ITGB8	P26012	ENSG00000105855
Environmental Information Processing	Signal transduction	PI3K-Akt signaling pathway	integrin subunit beta 8	K06591 ITGB8; integrin beta 8	4.253	2.089	No	3.25158e-08	integrin subunit beta 8 [Source:HGNC Symbol;Acc:HGNC:6163]	ITGB8	P26012	ENSG00000105855
Environmental Information Processing	Signaling molecules and interaction	Cell adhesion molecules	integrin subunit beta 8	K06591 ITGB8; integrin beta 8	4.253	2.089	No	3.25158e-08	integrin subunit beta 8 [Source:HGNC Symbol;Acc:HGNC:6163]	ITGB8	P26012	ENSG00000105855
Environmental Information Processing	Signaling molecules and interaction	ECM-receptor interaction	integrin subunit beta 8	K06591 ITGB8; integrin beta 8	4.253	2.089	No	3.25158e-08	integrin subunit beta 8 [Source:HGNC Symbol;Acc:HGNC:6163]	ITGB8	P26012	ENSG00000105855
Cellular Processes	Cell growth and death	Ferroptosis	ferritin heavy chain 1	K00522 FTH1; ferritin heavy chain [EC:1.16.3.2]	4.244	2.085	No	4.12999e-17	ferritin, heavy polypeptide 1 [Source:HGNC Symbol;Acc:HGNC:3976]	FTH1	P02794	ENSG00000167996
Cellular Processes	Cell growth and death	Necroptosis	ferritin heavy chain 1	K00522 FTH1; ferritin heavy chain [EC:1.16.3.2]	4.244	2.085	No	4.12999e-17	ferritin, heavy polypeptide 1 [Source:HGNC Symbol;Acc:HGNC:3976]	FTH1	P02794	ENSG00000167996
Organismal Systems	Digestive system	Mineral absorption	ferritin heavy chain 1	K00522 FTH1; ferritin heavy chain [EC:1.16.3.2]	4.244	2.085	No	4.12999e-17	ferritin, heavy polypeptide 1 [Source:HGNC Symbol;Acc:HGNC:3976]	FTH1	P02794	ENSG00000167996
Metabolism	Carbohydrate metabolism	Amino sugar and nucleotide sugar metabolism	chitinase 1	K01183 E3.2.1.14; chitinase [EC:3.2.1.14]	4.241	2.084	No	0.000939814	chitinase 1 [Source:HGNC Symbol;Acc:HGNC:1936]	CHIT1	Q13231	ENSG00000133063
Environmental Information Processing	Signal transduction	NF-kappa B signaling pathway	EDAR associated death domain	K23324 EDARADD; ectodysplasin-A receptor-associated adapter protein	4.232	2.081	No	0.013037	EDAR-associated death domain [Source:HGNC Symbol;Acc:HGNC:14341]	EDARADD	Q8WWZ3	ENSG00000186197
Organismal Systems	Nervous system	Neurotrophin signaling pathway	interleukin 1 receptor associated kinase 2	K04731 IRAK2; interleukin-1 receptor-associated kinase 2 [EC:2.7.11.1]	4.164	2.058	No	1.65925e-14	interleukin 1 receptor associated kinase 2 [Source:HGNC Symbol;Acc:HGNC:6113]	IRAK2	O43187	ENSG00000134070
Environmental Information Processing	Signaling molecules and interaction	Cytokine-cytokine receptor interaction	TNF receptor superfamily member 11b	K05148 TNFRSF11B; tumor necrosis factor receptor superfamily member 11B	4.157	2.055	No	0.0135305	tumor necrosis factor receptor superfamily member 11b [Source:HGNC Symbol;Acc:HGNC:11909]	TNFRSF11B	O00300	ENSG00000164761
Organismal Systems	Development and regeneration	Osteoclast differentiation	TNF receptor superfamily member 11b	K05148 TNFRSF11B; tumor necrosis factor receptor superfamily member 11B	4.157	2.055	No	0.0135305	tumor necrosis factor receptor superfamily member 11b [Source:HGNC Symbol;Acc:HGNC:11909]	TNFRSF11B	O00300	ENSG00000164761
Organismal Systems	Immune system	Antigen processing and presentation	class II major histocompatibility complex transactivator	K08060 CIITA; MHC class II transactivator [EC:2.7.11.1]	4.076	2.027	No	2.05246e-05	class II, major histocompatibility complex, transactivator [Source:HGNC Symbol;Acc:HGNC:7067]	CIITA	P33076	ENSG00000179583
Environmental Information Processing	Signal transduction	Calcium signaling pathway	histamine receptor H1	K04149 HRH1; histamine receptor H1	4.047	2.017	No	1.08186e-25	histamine receptor H1 [Source:HGNC Symbol;Acc:HGNC:5182]	HRH1	P35367	ENSG00000196639
Environmental Information Processing	Signaling molecules and interaction	Neuroactive ligand-receptor interaction	histamine receptor H1	K04149 HRH1; histamine receptor H1	4.047	2.017	No	1.08186e-25	histamine receptor H1 [Source:HGNC Symbol;Acc:HGNC:5182]	HRH1	P35367	ENSG00000196639
Organismal Systems	Sensory system	Inflammatory mediator regulation of TRP channels	histamine receptor H1	K04149 HRH1; histamine receptor H1	4.047	2.017	No	1.08186e-25	histamine receptor H1 [Source:HGNC Symbol;Acc:HGNC:5182]	HRH1	P35367	ENSG00000196639
Organismal Systems	Immune system	NOD-like receptor signaling pathway	guanylate binding protein 4	K20899 GBP1_3_4_7; guanylate-binding protein 1/3/4/7	4.026	2.009	No	1.30208e-09	guanylate binding protein 4 [Source:HGNC Symbol;Acc:HGNC:20480]	GBP4	Q96PP9	ENSG00000162654
Environmental Information Processing	Signal transduction	MAPK signaling pathway	dual specificity phosphatase 1	K21278 DUSP1; dual specificity protein phosphatase 1 [EC:3.1.3.16 3.1.3.48]	3.982	1.994	No	9.46401e-08	dual specificity phosphatase 1 [Source:HGNC Symbol;Acc:HGNC:3064]	DUSP1	P28562	ENSG00000120129
Organismal Systems	Nervous system	Serotonergic synapse	dual specificity phosphatase 1	K21278 DUSP1; dual specificity protein phosphatase 1 [EC:3.1.3.16 3.1.3.48]	3.982	1.994	No	9.46401e-08	dual specificity phosphatase 1 [Source:HGNC Symbol;Acc:HGNC:3064]	DUSP1	P28562	ENSG00000120129
Environmental Information Processing	Signaling molecules and interaction	Cytokine-cytokine receptor interaction	CD70 molecule	K05470 TNFSF7; tumor necrosis factor ligand superfamily member 7	3.951	1.982	No	3.23089e-16	CD70 molecule [Source:HGNC Symbol;Acc:HGNC:11937]	CD70	P32970	ENSG00000125726
Environmental Information Processing	Signal transduction	HIF-1 signaling pathway	egl-9 family hypoxia inducible factor 3	K09592 EGLN; hypoxia-inducible factor prolyl hydroxylase [EC:1.14.11.29]	3.949	1.981	No	1.87811e-10	egl-9 family hypoxia-inducible factor 3 [Source:HGNC Symbol;Acc:HGNC:14661]	EGLN3	Q9H6Z9	ENSG00000129521
Cellular Processes	Transport and catabolism	Autophagy - animal	autophagy related 9B	K17907 ATG9; autophagy-related protein 9	3.907	1.966	No	0.00469584	autophagy related 9B [Source:HGNC Symbol;Acc:HGNC:21899]	ATG9B	Q674R7	ENSG00000181652
Cellular Processes	Transport and catabolism	Autophagy - other	autophagy related 9B	K17907 ATG9; autophagy-related protein 9	3.907	1.966	No	0.00469584	autophagy related 9B [Source:HGNC Symbol;Acc:HGNC:21899]	ATG9B	Q674R7	ENSG00000181652
Cellular Processes	Transport and catabolism	Mitophagy - animal	autophagy related 9B	K17907 ATG9; autophagy-related protein 9	3.907	1.966	No	0.00469584	autophagy related 9B [Source:HGNC Symbol;Acc:HGNC:21899]	ATG9B	Q674R7	ENSG00000181652
Metabolism	Glycan biosynthesis and metabolism	Mucin type O-glycan biosynthesis	polypeptide N-acetylgalactosaminyltransferase 3	K00710 GALNT; polypeptide N-acetylgalactosaminyltransferase [EC:2.4.1.41]	3.835	1.939	No	0.000886689	polypeptide N-acetylgalactosaminyltransferase 3 [Source:HGNC Symbol;Acc:HGNC:4125]	GALNT3	Q14435	ENSG00000115339
Metabolism	Glycan biosynthesis and metabolism	Other types of O-glycan biosynthesis	polypeptide N-acetylgalactosaminyltransferase 3	K00710 GALNT; polypeptide N-acetylgalactosaminyltransferase [EC:2.4.1.41]	3.835	1.939	No	0.000886689	polypeptide N-acetylgalactosaminyltransferase 3 [Source:HGNC Symbol;Acc:HGNC:4125]	GALNT3	Q14435	ENSG00000115339
Cellular Processes	Cellular community - eukaryotes	Focal adhesion	collagen type IV alpha 3 chain	K06237 COL4A; collagen type IV alpha	3.786	1.921	No	1.70277e-07	collagen, type IV, alpha 3 (Goodpasture antigen) [Source:HGNC Symbol;Acc:HGNC:2204]	COL4A3	Q01955	ENSG00000169031
Environmental Information Processing	Signal transduction	PI3K-Akt signaling pathway	collagen type IV alpha 3 chain	K06237 COL4A; collagen type IV alpha	3.786	1.921	No	1.70277e-07	collagen, type IV, alpha 3 (Goodpasture antigen) [Source:HGNC Symbol;Acc:HGNC:2204]	COL4A3	Q01955	ENSG00000169031
Environmental Information Processing	Signaling molecules and interaction	ECM-receptor interaction	collagen type IV alpha 3 chain	K06237 COL4A; collagen type IV alpha	3.786	1.921	No	1.70277e-07	collagen, type IV, alpha 3 (Goodpasture antigen) [Source:HGNC Symbol;Acc:HGNC:2204]	COL4A3	Q01955	ENSG00000169031
Organismal Systems	Digestive system	Protein digestion and absorption	collagen type IV alpha 3 chain	K06237 COL4A; collagen type IV alpha	3.786	1.921	No	1.70277e-07	collagen, type IV, alpha 3 (Goodpasture antigen) [Source:HGNC Symbol;Acc:HGNC:2204]	COL4A3	Q01955	ENSG00000169031
Organismal Systems	Endocrine system	Relaxin signaling pathway	collagen type IV alpha 3 chain	K06237 COL4A; collagen type IV alpha	3.786	1.921	No	1.70277e-07	collagen, type IV, alpha 3 (Goodpasture antigen) [Source:HGNC Symbol;Acc:HGNC:2204]	COL4A3	Q01955	ENSG00000169031
Organismal Systems	Immune system	NOD-like receptor signaling pathway	receptor interacting serine/threonine kinase 2	K08846 RIPK2; receptor-interacting serine/threonine-protein kinase 2 [EC:2.7.11.1]	3.782	1.919	No	5.58056e-22	receptor interacting serine/threonine kinase 2 [Source:HGNC Symbol;Acc:HGNC:10020]	RIPK2	O43353	ENSG00000104312
Organismal Systems	Nervous system	Neurotrophin signaling pathway	receptor interacting serine/threonine kinase 2	K08846 RIPK2; receptor-interacting serine/threonine-protein kinase 2 [EC:2.7.11.1]	3.782	1.919	No	5.58056e-22	receptor interacting serine/threonine kinase 2 [Source:HGNC Symbol;Acc:HGNC:10020]	RIPK2	O43353	ENSG00000104312
Organismal Systems	Immune system	C-type lectin receptor signaling pathway	inhibitor of nuclear factor kappa B kinase subunit epsilon	K07211 IKBKE; inhibitor of nuclear factor kappa-B kinase subunit epsilon [EC:2.7.11.10]	3.774	1.916	No	2.12517e-22	inhibitor of kappa light polypeptide gene enhancer in B-cells, kinase epsilon [Source:HGNC Symbol;Acc:HGNC:14552]	IKBKE	Q14164	ENSG00000263528
Organismal Systems	Immune system	Cytosolic DNA-sensing pathway	inhibitor of nuclear factor kappa B kinase subunit epsilon	K07211 IKBKE; inhibitor of nuclear factor kappa-B kinase subunit epsilon [EC:2.7.11.10]	3.774	1.916	No	2.12517e-22	inhibitor of kappa light polypeptide gene enhancer in B-cells, kinase epsilon [Source:HGNC Symbol;Acc:HGNC:14552]	IKBKE	Q14164	ENSG00000263528
Organismal Systems	Immune system	IL-17 signaling pathway	inhibitor of nuclear factor kappa B kinase subunit epsilon	K07211 IKBKE; inhibitor of nuclear factor kappa-B kinase subunit epsilon [EC:2.7.11.10]	3.774	1.916	No	2.12517e-22	inhibitor of kappa light polypeptide gene enhancer in B-cells, kinase epsilon [Source:HGNC Symbol;Acc:HGNC:14552]	IKBKE	Q14164	ENSG00000263528
Organismal Systems	Immune system	NOD-like receptor signaling pathway	inhibitor of nuclear factor kappa B kinase subunit epsilon	K07211 IKBKE; inhibitor of nuclear factor kappa-B kinase subunit epsilon [EC:2.7.11.10]	3.774	1.916	No	2.12517e-22	inhibitor of kappa light polypeptide gene enhancer in B-cells, kinase epsilon [Source:HGNC Symbol;Acc:HGNC:14552]	IKBKE	Q14164	ENSG00000263528
Organismal Systems	Immune system	RIG-I-like receptor signaling pathway	inhibitor of nuclear factor kappa B kinase subunit epsilon	K07211 IKBKE; inhibitor of nuclear factor kappa-B kinase subunit epsilon [EC:2.7.11.10]	3.774	1.916	No	2.12517e-22	inhibitor of kappa light polypeptide gene enhancer in B-cells, kinase epsilon [Source:HGNC Symbol;Acc:HGNC:14552]	IKBKE	Q14164	ENSG00000263528
Organismal Systems	Immune system	Toll-like receptor signaling pathway	inhibitor of nuclear factor kappa B kinase subunit epsilon	K07211 IKBKE; inhibitor of nuclear factor kappa-B kinase subunit epsilon [EC:2.7.11.10]	3.774	1.916	No	2.12517e-22	inhibitor of kappa light polypeptide gene enhancer in B-cells, kinase epsilon [Source:HGNC Symbol;Acc:HGNC:14552]	IKBKE	Q14164	ENSG00000263528
Organismal Systems	Digestive system	Mineral absorption	solute carrier family 30 member 1	K14688 SLC30A1; solute carrier family 30 (zinc transporter), member 1	3.721	1.896	No	3.91332e-19	solute carrier family 30 (zinc transporter), member 1 [Source:HGNC Symbol;Acc:HGNC:11012]	SLC30A1	Q9Y6M5	ENSG00000170385
Organismal Systems	Digestive system	Protein digestion and absorption	membrane metalloendopeptidase	K01389 MME; neprilysin [EC:3.4.24.11]	3.714	1.893	No	0.000291176	membrane metallo-endopeptidase [Source:HGNC Symbol;Acc:HGNC:7154]	MME	P08473	ENSG00000196549
Organismal Systems	Endocrine system	Renin-angiotensin system	membrane metalloendopeptidase	K01389 MME; neprilysin [EC:3.4.24.11]	3.714	1.893	No	0.000291176	membrane metallo-endopeptidase [Source:HGNC Symbol;Acc:HGNC:7154]	MME	P08473	ENSG00000196549
Organismal Systems	Immune system	Hematopoietic cell lineage	membrane metalloendopeptidase	K01389 MME; neprilysin [EC:3.4.24.11]	3.714	1.893	No	0.000291176	membrane metallo-endopeptidase [Source:HGNC Symbol;Acc:HGNC:7154]	MME	P08473	ENSG00000196549
Cellular Processes	Cell growth and death	Apoptosis	caspase 10	K04400 CASP10; caspase 10 [EC:3.4.22.63]	3.709	1.891	No	2.47665e-33	caspase 10 [Source:HGNC Symbol;Acc:HGNC:1500]	CASP10	Q92851	ENSG00000003400
Environmental Information Processing	Signal transduction	TNF signaling pathway	caspase 10	K04400 CASP10; caspase 10 [EC:3.4.22.63]	3.709	1.891	No	2.47665e-33	caspase 10 [Source:HGNC Symbol;Acc:HGNC:1500]	CASP10	Q92851	ENSG00000003400
Organismal Systems	Immune system	RIG-I-like receptor signaling pathway	caspase 10	K04400 CASP10; caspase 10 [EC:3.4.22.63]	3.709	1.891	No	2.47665e-33	caspase 10 [Source:HGNC Symbol;Acc:HGNC:1500]	CASP10	Q92851	ENSG00000003400
Genetic Information Processing	Folding, sorting and degradation	SNARE interactions in vesicular transport	syntaxin 11	K08487 STX11; syntaxin 11	3.705	1.889	No	3.69616e-09	syntaxin 11 [Source:HGNC Symbol;Acc:HGNC:11429]	STX11	O75558	ENSG00000135604
Metabolism	Nucleotide metabolism	Pyrimidine metabolism	uridine phosphorylase 1	K00757 udp; uridine phosphorylase [EC:2.4.2.3]	3.69	1.884	No	7.98309e-05	uridine phosphorylase 1 [Source:HGNC Symbol;Acc:HGNC:12576]	UPP1	Q16831	ENSG00000183696
Metabolism	Xenobiotics biodegradation and metabolism	Drug metabolism - other enzymes	uridine phosphorylase 1	K00757 udp; uridine phosphorylase [EC:2.4.2.3]	3.69	1.884	No	7.98309e-05	uridine phosphorylase 1 [Source:HGNC Symbol;Acc:HGNC:12576]	UPP1	Q16831	ENSG00000183696
Environmental Information Processing	Signal transduction	HIF-1 signaling pathway	angiopoietin 1	K05465 ANGPT1; angiopoietin 1	3.675	1.878	No	3.25138e-06	angiopoietin 1 [Source:HGNC Symbol;Acc:HGNC:484]	ANGPT1	Q15389	ENSG00000154188
Environmental Information Processing	Signal transduction	MAPK signaling pathway	angiopoietin 1	K05465 ANGPT1; angiopoietin 1	3.675	1.878	No	3.25138e-06	angiopoietin 1 [Source:HGNC Symbol;Acc:HGNC:484]	ANGPT1	Q15389	ENSG00000154188
Environmental Information Processing	Signal transduction	PI3K-Akt signaling pathway	angiopoietin 1	K05465 ANGPT1; angiopoietin 1	3.675	1.878	No	3.25138e-06	angiopoietin 1 [Source:HGNC Symbol;Acc:HGNC:484]	ANGPT1	Q15389	ENSG00000154188
Environmental Information Processing	Signal transduction	Rap1 signaling pathway	angiopoietin 1	K05465 ANGPT1; angiopoietin 1	3.675	1.878	No	3.25138e-06	angiopoietin 1 [Source:HGNC Symbol;Acc:HGNC:484]	ANGPT1	Q15389	ENSG00000154188
Environmental Information Processing	Signal transduction	Ras signaling pathway	angiopoietin 1	K05465 ANGPT1; angiopoietin 1	3.675	1.878	No	3.25138e-06	angiopoietin 1 [Source:HGNC Symbol;Acc:HGNC:484]	ANGPT1	Q15389	ENSG00000154188
Environmental Information Processing	Signal transduction	MAPK signaling pathway	RELB proto-oncogene, NF-kB subunit	K09253 RELB; transcription factor RelB	3.668	1.875	No	2.30137e-07	v-rel avian reticuloendotheliosis viral oncogene homolog B [Source:HGNC Symbol;Acc:HGNC:9956]	RELB	Q01201	ENSG00000104856
Environmental Information Processing	Signal transduction	NF-kappa B signaling pathway	RELB proto-oncogene, NF-kB subunit	K09253 RELB; transcription factor RelB	3.668	1.875	No	2.30137e-07	v-rel avian reticuloendotheliosis viral oncogene homolog B [Source:HGNC Symbol;Acc:HGNC:9956]	RELB	Q01201	ENSG00000104856
Organismal Systems	Development and regeneration	Osteoclast differentiation	RELB proto-oncogene, NF-kB subunit	K09253 RELB; transcription factor RelB	3.668	1.875	No	2.30137e-07	v-rel avian reticuloendotheliosis viral oncogene homolog B [Source:HGNC Symbol;Acc:HGNC:9956]	RELB	Q01201	ENSG00000104856
Organismal Systems	Immune system	C-type lectin receptor signaling pathway	RELB proto-oncogene, NF-kB subunit	K09253 RELB; transcription factor RelB	3.668	1.875	No	2.30137e-07	v-rel avian reticuloendotheliosis viral oncogene homolog B [Source:HGNC Symbol;Acc:HGNC:9956]	RELB	Q01201	ENSG00000104856
Metabolism	Metabolism of other amino acids	Glutathione metabolism	ChaC glutathione specific gamma-glutamylcyclotransferase 1	K07232 CHAC; glutathione-specific gamma-glutamylcyclotransferase [EC:4.3.2.7]	3.649	1.868	No	0.0327763	ChaC glutathione-specific gamma-glutamylcyclotransferase 1 [Source:HGNC Symbol;Acc:HGNC:28680]	CHAC1	Q9BUX1	ENSG00000128965
Cellular Processes	Cell motility	Regulation of actin cytoskeleton	fibroblast growth factor 1	K18496 FGF1; fibroblast growth factor 1	3.646	1.867	No	0.000109778	fibroblast growth factor 1 (acidic) [Source:HGNC Symbol;Acc:HGNC:3665]	FGF1	P05230	ENSG00000113578
Environmental Information Processing	Signal transduction	Calcium signaling pathway	fibroblast growth factor 1	K18496 FGF1; fibroblast growth factor 1	3.646	1.867	No	0.000109778	fibroblast growth factor 1 (acidic) [Source:HGNC Symbol;Acc:HGNC:3665]	FGF1	P05230	ENSG00000113578
Environmental Information Processing	Signal transduction	Hippo signaling pathway	fibroblast growth factor 1	K18496 FGF1; fibroblast growth factor 1	3.646	1.867	No	0.000109778	fibroblast growth factor 1 (acidic) [Source:HGNC Symbol;Acc:HGNC:3665]	FGF1	P05230	ENSG00000113578
Environmental Information Processing	Signal transduction	MAPK signaling pathway	fibroblast growth factor 1	K18496 FGF1; fibroblast growth factor 1	3.646	1.867	No	0.000109778	fibroblast growth factor 1 (acidic) [Source:HGNC Symbol;Acc:HGNC:3665]	FGF1	P05230	ENSG00000113578
Environmental Information Processing	Signal transduction	PI3K-Akt signaling pathway	fibroblast growth factor 1	K18496 FGF1; fibroblast growth factor 1	3.646	1.867	No	0.000109778	fibroblast growth factor 1 (acidic) [Source:HGNC Symbol;Acc:HGNC:3665]	FGF1	P05230	ENSG00000113578
Environmental Information Processing	Signal transduction	Rap1 signaling pathway	fibroblast growth factor 1	K18496 FGF1; fibroblast growth factor 1	3.646	1.867	No	0.000109778	fibroblast growth factor 1 (acidic) [Source:HGNC Symbol;Acc:HGNC:3665]	FGF1	P05230	ENSG00000113578
Environmental Information Processing	Signal transduction	Ras signaling pathway	fibroblast growth factor 1	K18496 FGF1; fibroblast growth factor 1	3.646	1.867	No	0.000109778	fibroblast growth factor 1 (acidic) [Source:HGNC Symbol;Acc:HGNC:3665]	FGF1	P05230	ENSG00000113578
Metabolism	Energy metabolism	Nitrogen metabolism	carbonic anhydrase 9	K01672 CA; carbonic anhydrase [EC:4.2.1.1]	3.591	1.844	No	4.88643e-06	carbonic anhydrase IX [Source:HGNC Symbol;Acc:HGNC:1383]	CA9	Q16790	ENSG00000107159
Organismal Systems	Digestive system	Mineral absorption	metallothionein 1E	K14739 MT1_2; metallothionein 1/2	3.577	1.839	No	3.34924e-13	metallothionein 1E [Source:HGNC Symbol;Acc:HGNC:7397]	MT1E	P04732	ENSG00000169715
Environmental Information Processing	Signal transduction	AMPK signaling pathway	carnitine palmitoyltransferase 1C	K19524 CPT1C; carnitine O-palmitoyltransferase 1, brain isoform [EC:2.3.1.21]	3.575	1.838	No	2.00777e-05	carnitine palmitoyltransferase 1C [Source:HGNC Symbol;Acc:HGNC:18540]	CPT1C	Q8TCG5	ENSG00000169169
Metabolism	Lipid metabolism	Fatty acid degradation	carnitine palmitoyltransferase 1C	K19524 CPT1C; carnitine O-palmitoyltransferase 1, brain isoform [EC:2.3.1.21]	3.575	1.838	No	2.00777e-05	carnitine palmitoyltransferase 1C [Source:HGNC Symbol;Acc:HGNC:18540]	CPT1C	Q8TCG5	ENSG00000169169
Organismal Systems	Endocrine system	Adipocytokine signaling pathway	carnitine palmitoyltransferase 1C	K19524 CPT1C; carnitine O-palmitoyltransferase 1, brain isoform [EC:2.3.1.21]	3.575	1.838	No	2.00777e-05	carnitine palmitoyltransferase 1C [Source:HGNC Symbol;Acc:HGNC:18540]	CPT1C	Q8TCG5	ENSG00000169169
Organismal Systems	Endocrine system	Glucagon signaling pathway	carnitine palmitoyltransferase 1C	K19524 CPT1C; carnitine O-palmitoyltransferase 1, brain isoform [EC:2.3.1.21]	3.575	1.838	No	2.00777e-05	carnitine palmitoyltransferase 1C [Source:HGNC Symbol;Acc:HGNC:18540]	CPT1C	Q8TCG5	ENSG00000169169
Organismal Systems	Endocrine system	PPAR signaling pathway	carnitine palmitoyltransferase 1C	K19524 CPT1C; carnitine O-palmitoyltransferase 1, brain isoform [EC:2.3.1.21]	3.575	1.838	No	2.00777e-05	carnitine palmitoyltransferase 1C [Source:HGNC Symbol;Acc:HGNC:18540]	CPT1C	Q8TCG5	ENSG00000169169
Organismal Systems	Environmental adaptation	Thermogenesis	carnitine palmitoyltransferase 1C	K19524 CPT1C; carnitine O-palmitoyltransferase 1, brain isoform [EC:2.3.1.21]	3.575	1.838	No	2.00777e-05	carnitine palmitoyltransferase 1C [Source:HGNC Symbol;Acc:HGNC:18540]	CPT1C	Q8TCG5	ENSG00000169169
Metabolism	Lipid metabolism	Biosynthesis of unsaturated fatty acids	ELOVL fatty acid elongase 2	K10205 ELOVL2; elongation of very long chain fatty acids protein 2 [EC:2.3.1.199]	3.561	1.832	No	2.05968e-19	ELOVL fatty acid elongase 2 [Source:HGNC Symbol;Acc:HGNC:14416]	ELOVL2	Q9NXB9	ENSG00000197977
Metabolism	Lipid metabolism	Fatty acid elongation	ELOVL fatty acid elongase 2	K10205 ELOVL2; elongation of very long chain fatty acids protein 2 [EC:2.3.1.199]	3.561	1.832	No	2.05968e-19	ELOVL fatty acid elongase 2 [Source:HGNC Symbol;Acc:HGNC:14416]	ELOVL2	Q9NXB9	ENSG00000197977
Organismal Systems	Endocrine system	Estrogen signaling pathway	estrogen receptor 2	K08551 ESR2; estrogen receptor beta	3.533	1.821	No	0.00604728	estrogen receptor 2 (ER beta) [Source:HGNC Symbol;Acc:HGNC:3468]	ESR2	Q92731	ENSG00000140009
Organismal Systems	Endocrine system	GnRH secretion	estrogen receptor 2	K08551 ESR2; estrogen receptor beta	3.533	1.821	No	0.00604728	estrogen receptor 2 (ER beta) [Source:HGNC Symbol;Acc:HGNC:3468]	ESR2	Q92731	ENSG00000140009
Organismal Systems	Endocrine system	Prolactin signaling pathway	estrogen receptor 2	K08551 ESR2; estrogen receptor beta	3.533	1.821	No	0.00604728	estrogen receptor 2 (ER beta) [Source:HGNC Symbol;Acc:HGNC:3468]	ESR2	Q92731	ENSG00000140009
Organismal Systems	Endocrine system	Thyroid hormone signaling pathway	iodothyronine deiodinase 3	K07754 DIO3; thyroxine 5-deiodinase [EC:1.21.99.3]	3.533	1.821	No	0.0223572	deiodinase, iodothyronine, type III [Source:HGNC Symbol;Acc:HGNC:2885]	DIO3	P55073	ENSG00000197406
Environmental Information Processing	Signal transduction	FoxO signaling pathway	sphingosine-1-phosphate receptor 1	K04288 S1PR1; sphingosine 1-phosphate receptor 1	3.523	1.817	No	0.0149463	sphingosine-1-phosphate receptor 1 [Source:HGNC Symbol;Acc:HGNC:3165]	S1PR1	P21453	ENSG00000170989
Environmental Information Processing	Signal transduction	Sphingolipid signaling pathway	sphingosine-1-phosphate receptor 1	K04288 S1PR1; sphingosine 1-phosphate receptor 1	3.523	1.817	No	0.0149463	sphingosine-1-phosphate receptor 1 [Source:HGNC Symbol;Acc:HGNC:3165]	S1PR1	P21453	ENSG00000170989
Environmental Information Processing	Signaling molecules and interaction	Neuroactive ligand-receptor interaction	sphingosine-1-phosphate receptor 1	K04288 S1PR1; sphingosine 1-phosphate receptor 1	3.523	1.817	No	0.0149463	sphingosine-1-phosphate receptor 1 [Source:HGNC Symbol;Acc:HGNC:3165]	S1PR1	P21453	ENSG00000170989
Environmental Information Processing	Signal transduction	JAK-STAT signaling pathway	suppressor of cytokine signaling 3	K04696 SOCS3; suppressor of cytokine signaling 3	3.511	1.812	No	1.5728e-10	suppressor of cytokine signaling 3 [Source:HGNC Symbol;Acc:HGNC:19391]	SOCS3	O14543	ENSG00000184557
Environmental Information Processing	Signal transduction	TNF signaling pathway	suppressor of cytokine signaling 3	K04696 SOCS3; suppressor of cytokine signaling 3	3.511	1.812	No	1.5728e-10	suppressor of cytokine signaling 3 [Source:HGNC Symbol;Acc:HGNC:19391]	SOCS3	O14543	ENSG00000184557
Genetic Information Processing	Folding, sorting and degradation	Ubiquitin mediated proteolysis	suppressor of cytokine signaling 3	K04696 SOCS3; suppressor of cytokine signaling 3	3.511	1.812	No	1.5728e-10	suppressor of cytokine signaling 3 [Source:HGNC Symbol;Acc:HGNC:19391]	SOCS3	O14543	ENSG00000184557
Organismal Systems	Development and regeneration	Osteoclast differentiation	suppressor of cytokine signaling 3	K04696 SOCS3; suppressor of cytokine signaling 3	3.511	1.812	No	1.5728e-10	suppressor of cytokine signaling 3 [Source:HGNC Symbol;Acc:HGNC:19391]	SOCS3	O14543	ENSG00000184557
Organismal Systems	Endocrine system	Adipocytokine signaling pathway	suppressor of cytokine signaling 3	K04696 SOCS3; suppressor of cytokine signaling 3	3.511	1.812	No	1.5728e-10	suppressor of cytokine signaling 3 [Source:HGNC Symbol;Acc:HGNC:19391]	SOCS3	O14543	ENSG00000184557
Organismal Systems	Endocrine system	Growth hormone synthesis, secretion and action	suppressor of cytokine signaling 3	K04696 SOCS3; suppressor of cytokine signaling 3	3.511	1.812	No	1.5728e-10	suppressor of cytokine signaling 3 [Source:HGNC Symbol;Acc:HGNC:19391]	SOCS3	O14543	ENSG00000184557
Organismal Systems	Endocrine system	Insulin signaling pathway	suppressor of cytokine signaling 3	K04696 SOCS3; suppressor of cytokine signaling 3	3.511	1.812	No	1.5728e-10	suppressor of cytokine signaling 3 [Source:HGNC Symbol;Acc:HGNC:19391]	SOCS3	O14543	ENSG00000184557
Organismal Systems	Endocrine system	Prolactin signaling pathway	suppressor of cytokine signaling 3	K04696 SOCS3; suppressor of cytokine signaling 3	3.511	1.812	No	1.5728e-10	suppressor of cytokine signaling 3 [Source:HGNC Symbol;Acc:HGNC:19391]	SOCS3	O14543	ENSG00000184557
Metabolism	Lipid metabolism	Steroid hormone biosynthesis	aldo-keto reductase family 1 member C2	K00089 AKR1C2; 3alpha-hydroxysteroid 3-dehydrogenase [EC:1.1.1.213 1.1.1.357]	3.508	1.811	No	0.0414031	aldo-keto reductase family 1, member C2 [Source:HGNC Symbol;Acc:HGNC:385]	AKR1C2	P52895	ENSG00000151632
Not Included in Pathway or Brite	Unclassified: metabolism	Enzymes with EC numbers	lysyl oxidase	K00277 LOX; protein-lysine 6-oxidase [EC:1.4.3.13]	3.466	1.793	No	4.22392e-16	lysyl oxidase [Source:HGNC Symbol;Acc:HGNC:6664]	LOX	P28300	ENSG00000113083
Environmental Information Processing	Signal transduction	TNF signaling pathway	CCAAT enhancer binding protein beta	K10048 CEBPB; CCAAT/enhancer binding protein (C/EBP), beta	3.462	1.792	No	4.51233e-10	CCAAT/enhancer binding protein (C/EBP), beta [Source:HGNC Symbol;Acc:HGNC:1834]	CEBPB	P17676	ENSG00000172216
Organismal Systems	Immune system	IL-17 signaling pathway	CCAAT enhancer binding protein beta	K10048 CEBPB; CCAAT/enhancer binding protein (C/EBP), beta	3.462	1.792	No	4.51233e-10	CCAAT/enhancer binding protein (C/EBP), beta [Source:HGNC Symbol;Acc:HGNC:1834]	CEBPB	P17676	ENSG00000172216
Not Included in Pathway or Brite	Unclassified: signaling and cellular processes	Signaling proteins	regulator of G protein signaling 16	K16449 RGS; regulator of G-protein signaling	3.445	1.785	No	0.00261325	regulator of G-protein signaling 16 [Source:HGNC Symbol;Acc:HGNC:9997]	RGS16	O15492	ENSG00000143333
Environmental Information Processing	Signal transduction	Wnt signaling pathway	R-spondin 3	K23098 RSPO3; R-spondin 3	3.346	1.742	No	0.00482437	R-spondin 3 [Source:HGNC Symbol;Acc:HGNC:20866]	RSPO3	Q9BXY4	ENSG00000146374
Cellular Processes	Cell growth and death	Ferroptosis	solute carrier family 39 member 14	K14720 SLC39A14; solute carrier family 39 (zinc transporter), member 14	3.344	1.741	No	3.20639e-30	solute carrier family 39 (zinc transporter), member 14 [Source:HGNC Symbol;Acc:HGNC:20858]	SLC39A14	Q15043	ENSG00000104635
Environmental Information Processing	Signal transduction	JAK-STAT signaling pathway	prolactin receptor	K05081 PRLR; prolactin receptor	3.341	1.74	No	0.00800153	prolactin receptor [Source:HGNC Symbol;Acc:HGNC:9446]	PRLR	P16471	ENSG00000113494
Environmental Information Processing	Signal transduction	PI3K-Akt signaling pathway	prolactin receptor	K05081 PRLR; prolactin receptor	3.341	1.74	No	0.00800153	prolactin receptor [Source:HGNC Symbol;Acc:HGNC:9446]	PRLR	P16471	ENSG00000113494
Environmental Information Processing	Signaling molecules and interaction	Cytokine-cytokine receptor interaction	prolactin receptor	K05081 PRLR; prolactin receptor	3.341	1.74	No	0.00800153	prolactin receptor [Source:HGNC Symbol;Acc:HGNC:9446]	PRLR	P16471	ENSG00000113494
Environmental Information Processing	Signaling molecules and interaction	Neuroactive ligand-receptor interaction	prolactin receptor	K05081 PRLR; prolactin receptor	3.341	1.74	No	0.00800153	prolactin receptor [Source:HGNC Symbol;Acc:HGNC:9446]	PRLR	P16471	ENSG00000113494
Organismal Systems	Endocrine system	Prolactin signaling pathway	prolactin receptor	K05081 PRLR; prolactin receptor	3.341	1.74	No	0.00800153	prolactin receptor [Source:HGNC Symbol;Acc:HGNC:9446]	PRLR	P16471	ENSG00000113494
Cellular Processes	Cell growth and death	Ferroptosis	spermidine/spermine N1-acetyltransferase 1	K00657 speG; diamine N-acetyltransferase [EC:2.3.1.57]	3.319	1.731	No	6.01456e-10	spermidine/spermine N1-acetyltransferase 1 [Source:HGNC Symbol;Acc:HGNC:10540]	SAT1	P21673	ENSG00000130066
Metabolism	Amino acid metabolism	Arginine and proline metabolism	spermidine/spermine N1-acetyltransferase 1	K00657 speG; diamine N-acetyltransferase [EC:2.3.1.57]	3.319	1.731	No	6.01456e-10	spermidine/spermine N1-acetyltransferase 1 [Source:HGNC Symbol;Acc:HGNC:10540]	SAT1	P21673	ENSG00000130066
Environmental Information Processing	Signal transduction	Calcium signaling pathway	purinergic receptor P2X 4	K05218 P2RX4; P2X purinoceptor 4	3.313	1.728	No	7.77084e-12	purinergic receptor P2X, ligand gated ion channel, 4 [Source:HGNC Symbol;Acc:HGNC:8535]	P2RX4	Q99571	ENSG00000135124
Environmental Information Processing	Signaling molecules and interaction	Neuroactive ligand-receptor interaction	purinergic receptor P2X 4	K05218 P2RX4; P2X purinoceptor 4	3.313	1.728	No	7.77084e-12	purinergic receptor P2X, ligand gated ion channel, 4 [Source:HGNC Symbol;Acc:HGNC:8535]	P2RX4	Q99571	ENSG00000135124
Cellular Processes	Cell growth and death	Necroptosis	interferon beta 1	K05415 IFNB; interferon beta	3.298	1.722	No	0.000632381	interferon, beta 1, fibroblast [Source:HGNC Symbol;Acc:HGNC:5434]	IFNB1	P01574	ENSG00000171855
Environmental Information Processing	Signal transduction	JAK-STAT signaling pathway	interferon beta 1	K05415 IFNB; interferon beta	3.298	1.722	No	0.000632381	interferon, beta 1, fibroblast [Source:HGNC Symbol;Acc:HGNC:5434]	IFNB1	P01574	ENSG00000171855
Environmental Information Processing	Signal transduction	PI3K-Akt signaling pathway	interferon beta 1	K05415 IFNB; interferon beta	3.298	1.722	No	0.000632381	interferon, beta 1, fibroblast [Source:HGNC Symbol;Acc:HGNC:5434]	IFNB1	P01574	ENSG00000171855
Environmental Information Processing	Signal transduction	TNF signaling pathway	interferon beta 1	K05415 IFNB; interferon beta	3.298	1.722	No	0.000632381	interferon, beta 1, fibroblast [Source:HGNC Symbol;Acc:HGNC:5434]	IFNB1	P01574	ENSG00000171855
Environmental Information Processing	Signaling molecules and interaction	Cytokine-cytokine receptor interaction	interferon beta 1	K05415 IFNB; interferon beta	3.298	1.722	No	0.000632381	interferon, beta 1, fibroblast [Source:HGNC Symbol;Acc:HGNC:5434]	IFNB1	P01574	ENSG00000171855
Organismal Systems	Development and regeneration	Osteoclast differentiation	interferon beta 1	K05415 IFNB; interferon beta	3.298	1.722	No	0.000632381	interferon, beta 1, fibroblast [Source:HGNC Symbol;Acc:HGNC:5434]	IFNB1	P01574	ENSG00000171855
Organismal Systems	Immune system	Cytosolic DNA-sensing pathway	interferon beta 1	K05415 IFNB; interferon beta	3.298	1.722	No	0.000632381	interferon, beta 1, fibroblast [Source:HGNC Symbol;Acc:HGNC:5434]	IFNB1	P01574	ENSG00000171855
Organismal Systems	Immune system	Natural killer cell mediated cytotoxicity	interferon beta 1	K05415 IFNB; interferon beta	3.298	1.722	No	0.000632381	interferon, beta 1, fibroblast [Source:HGNC Symbol;Acc:HGNC:5434]	IFNB1	P01574	ENSG00000171855
Organismal Systems	Immune system	NOD-like receptor signaling pathway	interferon beta 1	K05415 IFNB; interferon beta	3.298	1.722	No	0.000632381	interferon, beta 1, fibroblast [Source:HGNC Symbol;Acc:HGNC:5434]	IFNB1	P01574	ENSG00000171855
Organismal Systems	Immune system	RIG-I-like receptor signaling pathway	interferon beta 1	K05415 IFNB; interferon beta	3.298	1.722	No	0.000632381	interferon, beta 1, fibroblast [Source:HGNC Symbol;Acc:HGNC:5434]	IFNB1	P01574	ENSG00000171855
Organismal Systems	Immune system	Toll-like receptor signaling pathway	interferon beta 1	K05415 IFNB; interferon beta	3.298	1.722	No	0.000632381	interferon, beta 1, fibroblast [Source:HGNC Symbol;Acc:HGNC:5434]	IFNB1	P01574	ENSG00000171855
Environmental Information Processing	Signaling molecules and interaction	Cytokine-cytokine receptor interaction	interleukin 18	K05482 IL18; interleukin 18	3.287	1.717	No	1.54467e-13	interleukin 18 [Source:HGNC Symbol;Acc:HGNC:5986]	IL18	Q14116	ENSG00000150782
Environmental Information Processing	Signaling molecules and interaction	Viral protein interaction with cytokine and cytokine receptor	interleukin 18	K05482 IL18; interleukin 18	3.287	1.717	No	1.54467e-13	interleukin 18 [Source:HGNC Symbol;Acc:HGNC:5986]	IL18	Q14116	ENSG00000150782
Organismal Systems	Immune system	Cytosolic DNA-sensing pathway	interleukin 18	K05482 IL18; interleukin 18	3.287	1.717	No	1.54467e-13	interleukin 18 [Source:HGNC Symbol;Acc:HGNC:5986]	IL18	Q14116	ENSG00000150782
Organismal Systems	Immune system	NOD-like receptor signaling pathway	interleukin 18	K05482 IL18; interleukin 18	3.287	1.717	No	1.54467e-13	interleukin 18 [Source:HGNC Symbol;Acc:HGNC:5986]	IL18	Q14116	ENSG00000150782
Cellular Processes	Cellular community - eukaryotes	Tight junction	par-6 family cell polarity regulator beta	K06093 PARD6; partitioning defective protein 6	3.262	1.706	No	1.38573e-06	par-6 family cell polarity regulator beta [Source:HGNC Symbol;Acc:HGNC:16245]	PARD6B	Q9BYG5	ENSG00000124171
Cellular Processes	Transport and catabolism	Endocytosis	par-6 family cell polarity regulator beta	K06093 PARD6; partitioning defective protein 6	3.262	1.706	No	1.38573e-06	par-6 family cell polarity regulator beta [Source:HGNC Symbol;Acc:HGNC:16245]	PARD6B	Q9BYG5	ENSG00000124171
Environmental Information Processing	Signal transduction	Hippo signaling pathway	par-6 family cell polarity regulator beta	K06093 PARD6; partitioning defective protein 6	3.262	1.706	No	1.38573e-06	par-6 family cell polarity regulator beta [Source:HGNC Symbol;Acc:HGNC:16245]	PARD6B	Q9BYG5	ENSG00000124171
Environmental Information Processing	Signal transduction	Rap1 signaling pathway	par-6 family cell polarity regulator beta	K06093 PARD6; partitioning defective protein 6	3.262	1.706	No	1.38573e-06	par-6 family cell polarity regulator beta [Source:HGNC Symbol;Acc:HGNC:16245]	PARD6B	Q9BYG5	ENSG00000124171
Organismal Systems	Development and regeneration	Axon guidance	par-6 family cell polarity regulator beta	K06093 PARD6; partitioning defective protein 6	3.262	1.706	No	1.38573e-06	par-6 family cell polarity regulator beta [Source:HGNC Symbol;Acc:HGNC:16245]	PARD6B	Q9BYG5	ENSG00000124171
Cellular Processes	Cell growth and death	Apoptosis	spectrin alpha, erythrocytic 1	K06114 SPTA; spectrin alpha	3.234	1.693	No	0.00200661	spectrin, alpha, erythrocytic 1 [Source:HGNC Symbol;Acc:HGNC:11272]	SPTA1	P02549	ENSG00000163554
Environmental Information Processing	Signal transduction	Apelin signaling pathway	nitric oxide synthase 3	K13242 NOS3; nitric-oxide synthase, endothelial [EC:1.14.13.39]	3.198	1.677	No	0.000127837	nitric oxide synthase 3 [Source:HGNC Symbol;Acc:HGNC:7876]	NOS3	P29474	ENSG00000164867
Environmental Information Processing	Signal transduction	Calcium signaling pathway	nitric oxide synthase 3	K13242 NOS3; nitric-oxide synthase, endothelial [EC:1.14.13.39]	3.198	1.677	No	0.000127837	nitric oxide synthase 3 [Source:HGNC Symbol;Acc:HGNC:7876]	NOS3	P29474	ENSG00000164867
Environmental Information Processing	Signal transduction	cGMP-PKG signaling pathway	nitric oxide synthase 3	K13242 NOS3; nitric-oxide synthase, endothelial [EC:1.14.13.39]	3.198	1.677	No	0.000127837	nitric oxide synthase 3 [Source:HGNC Symbol;Acc:HGNC:7876]	NOS3	P29474	ENSG00000164867
Environmental Information Processing	Signal transduction	HIF-1 signaling pathway	nitric oxide synthase 3	K13242 NOS3; nitric-oxide synthase, endothelial [EC:1.14.13.39]	3.198	1.677	No	0.000127837	nitric oxide synthase 3 [Source:HGNC Symbol;Acc:HGNC:7876]	NOS3	P29474	ENSG00000164867
Environmental Information Processing	Signal transduction	PI3K-Akt signaling pathway	nitric oxide synthase 3	K13242 NOS3; nitric-oxide synthase, endothelial [EC:1.14.13.39]	3.198	1.677	No	0.000127837	nitric oxide synthase 3 [Source:HGNC Symbol;Acc:HGNC:7876]	NOS3	P29474	ENSG00000164867
Environmental Information Processing	Signal transduction	Sphingolipid signaling pathway	nitric oxide synthase 3	K13242 NOS3; nitric-oxide synthase, endothelial [EC:1.14.13.39]	3.198	1.677	No	0.000127837	nitric oxide synthase 3 [Source:HGNC Symbol;Acc:HGNC:7876]	NOS3	P29474	ENSG00000164867
Environmental Information Processing	Signal transduction	VEGF signaling pathway	nitric oxide synthase 3	K13242 NOS3; nitric-oxide synthase, endothelial [EC:1.14.13.39]	3.198	1.677	No	0.000127837	nitric oxide synthase 3 [Source:HGNC Symbol;Acc:HGNC:7876]	NOS3	P29474	ENSG00000164867
Metabolism	Amino acid metabolism	Arginine and proline metabolism	nitric oxide synthase 3	K13242 NOS3; nitric-oxide synthase, endothelial [EC:1.14.13.39]	3.198	1.677	No	0.000127837	nitric oxide synthase 3 [Source:HGNC Symbol;Acc:HGNC:7876]	NOS3	P29474	ENSG00000164867
Metabolism	Amino acid metabolism	Arginine biosynthesis	nitric oxide synthase 3	K13242 NOS3; nitric-oxide synthase, endothelial [EC:1.14.13.39]	3.198	1.677	No	0.000127837	nitric oxide synthase 3 [Source:HGNC Symbol;Acc:HGNC:7876]	NOS3	P29474	ENSG00000164867
Organismal Systems	Endocrine system	Estrogen signaling pathway	nitric oxide synthase 3	K13242 NOS3; nitric-oxide synthase, endothelial [EC:1.14.13.39]	3.198	1.677	No	0.000127837	nitric oxide synthase 3 [Source:HGNC Symbol;Acc:HGNC:7876]	NOS3	P29474	ENSG00000164867
Organismal Systems	Endocrine system	Oxytocin signaling pathway	nitric oxide synthase 3	K13242 NOS3; nitric-oxide synthase, endothelial [EC:1.14.13.39]	3.198	1.677	No	0.000127837	nitric oxide synthase 3 [Source:HGNC Symbol;Acc:HGNC:7876]	NOS3	P29474	ENSG00000164867
Organismal Systems	Endocrine system	Relaxin signaling pathway	nitric oxide synthase 3	K13242 NOS3; nitric-oxide synthase, endothelial [EC:1.14.13.39]	3.198	1.677	No	0.000127837	nitric oxide synthase 3 [Source:HGNC Symbol;Acc:HGNC:7876]	NOS3	P29474	ENSG00000164867
Organismal Systems	Immune system	Platelet activation	nitric oxide synthase 3	K13242 NOS3; nitric-oxide synthase, endothelial [EC:1.14.13.39]	3.198	1.677	No	0.000127837	nitric oxide synthase 3 [Source:HGNC Symbol;Acc:HGNC:7876]	NOS3	P29474	ENSG00000164867
Environmental Information Processing	Signaling molecules and interaction	Cell adhesion molecules	programmed cell death 1 ligand 2	K06708 PDCD1LG2; programmed cell death 1 ligand 2	3.191	1.674	No	7.31409e-08	programmed cell death 1 ligand 2 [Source:HGNC Symbol;Acc:HGNC:18731]	PDCD1LG2	Q9BQ51	ENSG00000197646
Metabolism	Glycan biosynthesis and metabolism	Mucin type O-glycan biosynthesis	core 1 synthase, glycoprotein-N-acetylgalactosamine 3-beta-galactosyltransferase 1	K00731 C1GALT1; glycoprotein-N-acetylgalactosamine 3-beta-galactosyltransferase [EC:2.4.1.122]	3.189	1.673	No	3.35168e-32	core 1 synthase, glycoprotein-N-acetylgalactosamine 3-beta-galactosyltransferase 1 [Source:HGNC Symbol;Acc:HGNC:24337]	C1GALT1	Q9NS00	ENSG00000106392
Metabolism	Glycan biosynthesis and metabolism	Other types of O-glycan biosynthesis	core 1 synthase, glycoprotein-N-acetylgalactosamine 3-beta-galactosyltransferase 1	K00731 C1GALT1; glycoprotein-N-acetylgalactosamine 3-beta-galactosyltransferase [EC:2.4.1.122]	3.189	1.673	No	3.35168e-32	core 1 synthase, glycoprotein-N-acetylgalactosamine 3-beta-galactosyltransferase 1 [Source:HGNC Symbol;Acc:HGNC:24337]	C1GALT1	Q9NS00	ENSG00000106392
Environmental Information Processing	Signaling molecules and interaction	Cell adhesion molecules	CD274 molecule	K06745 PDL1; programmed cell death 1 ligand 1	3.181	1.67	No	9.20504e-07	CD274 molecule [Source:HGNC Symbol;Acc:HGNC:17635]	CD274	Q9NZQ7	ENSG00000120217
Environmental Information Processing	Signal transduction	cAMP signaling pathway	ATPase Na+/K+ transporting subunit alpha 2	K01539 ATP1A; sodium/potassium-transporting ATPase subunit alpha [EC:7.2.2.13]	3.155	1.658	No	0.0400859	ATPase, Na+/K+ transporting, alpha 2 polypeptide [Source:HGNC Symbol;Acc:HGNC:800]	ATP1A2	P50993	ENSG00000018625
Environmental Information Processing	Signal transduction	cGMP-PKG signaling pathway	ATPase Na+/K+ transporting subunit alpha 2	K01539 ATP1A; sodium/potassium-transporting ATPase subunit alpha [EC:7.2.2.13]	3.155	1.658	No	0.0400859	ATPase, Na+/K+ transporting, alpha 2 polypeptide [Source:HGNC Symbol;Acc:HGNC:800]	ATP1A2	P50993	ENSG00000018625
Organismal Systems	Circulatory system	Adrenergic signaling in cardiomyocytes	ATPase Na+/K+ transporting subunit alpha 2	K01539 ATP1A; sodium/potassium-transporting ATPase subunit alpha [EC:7.2.2.13]	3.155	1.658	No	0.0400859	ATPase, Na+/K+ transporting, alpha 2 polypeptide [Source:HGNC Symbol;Acc:HGNC:800]	ATP1A2	P50993	ENSG00000018625
Organismal Systems	Circulatory system	Cardiac muscle contraction	ATPase Na+/K+ transporting subunit alpha 2	K01539 ATP1A; sodium/potassium-transporting ATPase subunit alpha [EC:7.2.2.13]	3.155	1.658	No	0.0400859	ATPase, Na+/K+ transporting, alpha 2 polypeptide [Source:HGNC Symbol;Acc:HGNC:800]	ATP1A2	P50993	ENSG00000018625
Organismal Systems	Digestive system	Bile secretion	ATPase Na+/K+ transporting subunit alpha 2	K01539 ATP1A; sodium/potassium-transporting ATPase subunit alpha [EC:7.2.2.13]	3.155	1.658	No	0.0400859	ATPase, Na+/K+ transporting, alpha 2 polypeptide [Source:HGNC Symbol;Acc:HGNC:800]	ATP1A2	P50993	ENSG00000018625
Organismal Systems	Digestive system	Carbohydrate digestion and absorption	ATPase Na+/K+ transporting subunit alpha 2	K01539 ATP1A; sodium/potassium-transporting ATPase subunit alpha [EC:7.2.2.13]	3.155	1.658	No	0.0400859	ATPase, Na+/K+ transporting, alpha 2 polypeptide [Source:HGNC Symbol;Acc:HGNC:800]	ATP1A2	P50993	ENSG00000018625
Organismal Systems	Digestive system	Gastric acid secretion	ATPase Na+/K+ transporting subunit alpha 2	K01539 ATP1A; sodium/potassium-transporting ATPase subunit alpha [EC:7.2.2.13]	3.155	1.658	No	0.0400859	ATPase, Na+/K+ transporting, alpha 2 polypeptide [Source:HGNC Symbol;Acc:HGNC:800]	ATP1A2	P50993	ENSG00000018625
Organismal Systems	Digestive system	Mineral absorption	ATPase Na+/K+ transporting subunit alpha 2	K01539 ATP1A; sodium/potassium-transporting ATPase subunit alpha [EC:7.2.2.13]	3.155	1.658	No	0.0400859	ATPase, Na+/K+ transporting, alpha 2 polypeptide [Source:HGNC Symbol;Acc:HGNC:800]	ATP1A2	P50993	ENSG00000018625
Organismal Systems	Digestive system	Pancreatic secretion	ATPase Na+/K+ transporting subunit alpha 2	K01539 ATP1A; sodium/potassium-transporting ATPase subunit alpha [EC:7.2.2.13]	3.155	1.658	No	0.0400859	ATPase, Na+/K+ transporting, alpha 2 polypeptide [Source:HGNC Symbol;Acc:HGNC:800]	ATP1A2	P50993	ENSG00000018625
Organismal Systems	Digestive system	Protein digestion and absorption	ATPase Na+/K+ transporting subunit alpha 2	K01539 ATP1A; sodium/potassium-transporting ATPase subunit alpha [EC:7.2.2.13]	3.155	1.658	No	0.0400859	ATPase, Na+/K+ transporting, alpha 2 polypeptide [Source:HGNC Symbol;Acc:HGNC:800]	ATP1A2	P50993	ENSG00000018625
Organismal Systems	Digestive system	Salivary secretion	ATPase Na+/K+ transporting subunit alpha 2	K01539 ATP1A; sodium/potassium-transporting ATPase subunit alpha [EC:7.2.2.13]	3.155	1.658	No	0.0400859	ATPase, Na+/K+ transporting, alpha 2 polypeptide [Source:HGNC Symbol;Acc:HGNC:800]	ATP1A2	P50993	ENSG00000018625
Organismal Systems	Endocrine system	Aldosterone synthesis and secretion	ATPase Na+/K+ transporting subunit alpha 2	K01539 ATP1A; sodium/potassium-transporting ATPase subunit alpha [EC:7.2.2.13]	3.155	1.658	No	0.0400859	ATPase, Na+/K+ transporting, alpha 2 polypeptide [Source:HGNC Symbol;Acc:HGNC:800]	ATP1A2	P50993	ENSG00000018625
Organismal Systems	Endocrine system	Insulin secretion	ATPase Na+/K+ transporting subunit alpha 2	K01539 ATP1A; sodium/potassium-transporting ATPase subunit alpha [EC:7.2.2.13]	3.155	1.658	No	0.0400859	ATPase, Na+/K+ transporting, alpha 2 polypeptide [Source:HGNC Symbol;Acc:HGNC:800]	ATP1A2	P50993	ENSG00000018625
Organismal Systems	Endocrine system	Thyroid hormone signaling pathway	ATPase Na+/K+ transporting subunit alpha 2	K01539 ATP1A; sodium/potassium-transporting ATPase subunit alpha [EC:7.2.2.13]	3.155	1.658	No	0.0400859	ATPase, Na+/K+ transporting, alpha 2 polypeptide [Source:HGNC Symbol;Acc:HGNC:800]	ATP1A2	P50993	ENSG00000018625
Organismal Systems	Endocrine system	Thyroid hormone synthesis	ATPase Na+/K+ transporting subunit alpha 2	K01539 ATP1A; sodium/potassium-transporting ATPase subunit alpha [EC:7.2.2.13]	3.155	1.658	No	0.0400859	ATPase, Na+/K+ transporting, alpha 2 polypeptide [Source:HGNC Symbol;Acc:HGNC:800]	ATP1A2	P50993	ENSG00000018625
Organismal Systems	Excretory system	Aldosterone-regulated sodium reabsorption	ATPase Na+/K+ transporting subunit alpha 2	K01539 ATP1A; sodium/potassium-transporting ATPase subunit alpha [EC:7.2.2.13]	3.155	1.658	No	0.0400859	ATPase, Na+/K+ transporting, alpha 2 polypeptide [Source:HGNC Symbol;Acc:HGNC:800]	ATP1A2	P50993	ENSG00000018625
Organismal Systems	Excretory system	Endocrine and other factor-regulated calcium reabsorption	ATPase Na+/K+ transporting subunit alpha 2	K01539 ATP1A; sodium/potassium-transporting ATPase subunit alpha [EC:7.2.2.13]	3.155	1.658	No	0.0400859	ATPase, Na+/K+ transporting, alpha 2 polypeptide [Source:HGNC Symbol;Acc:HGNC:800]	ATP1A2	P50993	ENSG00000018625
Organismal Systems	Excretory system	Proximal tubule bicarbonate reclamation	ATPase Na+/K+ transporting subunit alpha 2	K01539 ATP1A; sodium/potassium-transporting ATPase subunit alpha [EC:7.2.2.13]	3.155	1.658	No	0.0400859	ATPase, Na+/K+ transporting, alpha 2 polypeptide [Source:HGNC Symbol;Acc:HGNC:800]	ATP1A2	P50993	ENSG00000018625
Environmental Information Processing	Signal transduction	TGF-beta signaling pathway	TGFB induced factor homeobox 1	K19383 TGIF1; homeobox protein TGIF1	3.146	1.654	No	1.8191e-14	TGFB-induced factor homeobox 1 [Source:HGNC Symbol;Acc:HGNC:11776]	TGIF1	Q15583	ENSG00000177426
Cellular Processes	Cellular community - eukaryotes	Signaling pathways regulating pluripotency of stem cells	inhibin subunit beta A	K04667 INHBA; inhibin beta A chain	3.119	1.641	No	1.24294e-06	inhibin beta A [Source:HGNC Symbol;Acc:HGNC:6066]	INHBA	P08476	ENSG00000122641
Environmental Information Processing	Signal transduction	TGF-beta signaling pathway	inhibin subunit beta A	K04667 INHBA; inhibin beta A chain	3.119	1.641	No	1.24294e-06	inhibin beta A [Source:HGNC Symbol;Acc:HGNC:6066]	INHBA	P08476	ENSG00000122641
Environmental Information Processing	Signaling molecules and interaction	Cytokine-cytokine receptor interaction	inhibin subunit beta A	K04667 INHBA; inhibin beta A chain	3.119	1.641	No	1.24294e-06	inhibin beta A [Source:HGNC Symbol;Acc:HGNC:6066]	INHBA	P08476	ENSG00000122641
Organismal Systems	Development and regeneration	Axon guidance	semaphorin 6D	K06842 SEMA6; semaphorin 6	3.117	1.64	No	7.31409e-08	sema domain, transmembrane domain (TM), and cytoplasmic domain, (semaphorin) 6D [Source:HGNC Symbol;Acc:HGNC:16770]	SEMA6D	Q8NFY4	ENSG00000137872
Environmental Information Processing	Signal transduction	JAK-STAT signaling pathway	colony stimulating factor 2 receptor subunit alpha	K05066 CSF2RA; granulocyte-macrophage colony-stimulating factor receptor alpha	3.111	1.637	No	0.00947967	colony stimulating factor 2 receptor, alpha, low-affinity (granulocyte-macrophage) [Source:HGNC Symbol;Acc:HGNC:2435]	CSF2RA	P15509	ENSG00000198223
Environmental Information Processing	Signaling molecules and interaction	Cytokine-cytokine receptor interaction	colony stimulating factor 2 receptor subunit alpha	K05066 CSF2RA; granulocyte-macrophage colony-stimulating factor receptor alpha	3.111	1.637	No	0.00947967	colony stimulating factor 2 receptor, alpha, low-affinity (granulocyte-macrophage) [Source:HGNC Symbol;Acc:HGNC:2435]	CSF2RA	P15509	ENSG00000198223
Organismal Systems	Immune system	Hematopoietic cell lineage	colony stimulating factor 2 receptor subunit alpha	K05066 CSF2RA; granulocyte-macrophage colony-stimulating factor receptor alpha	3.111	1.637	No	0.00947967	colony stimulating factor 2 receptor, alpha, low-affinity (granulocyte-macrophage) [Source:HGNC Symbol;Acc:HGNC:2435]	CSF2RA	P15509	ENSG00000198223
Cellular Processes	Cell growth and death	Apoptosis	cathepsin L	K01365 CTSL; cathepsin L [EC:3.4.22.15]	3.082	1.624	No	1.06011e-13	cathepsin L [Source:HGNC Symbol;Acc:HGNC:2537]	CTSL	P07711	ENSG00000135047
Cellular Processes	Transport and catabolism	Autophagy - animal	cathepsin L	K01365 CTSL; cathepsin L [EC:3.4.22.15]	3.082	1.624	No	1.06011e-13	cathepsin L [Source:HGNC Symbol;Acc:HGNC:2537]	CTSL	P07711	ENSG00000135047
Cellular Processes	Transport and catabolism	Lysosome	cathepsin L	K01365 CTSL; cathepsin L [EC:3.4.22.15]	3.082	1.624	No	1.06011e-13	cathepsin L [Source:HGNC Symbol;Acc:HGNC:2537]	CTSL	P07711	ENSG00000135047
Cellular Processes	Transport and catabolism	Phagosome	cathepsin L	K01365 CTSL; cathepsin L [EC:3.4.22.15]	3.082	1.624	No	1.06011e-13	cathepsin L [Source:HGNC Symbol;Acc:HGNC:2537]	CTSL	P07711	ENSG00000135047
Metabolism	Glycan biosynthesis and metabolism	Mucin type O-glycan biosynthesis	glucosaminyl (N-acetyl) transferase 4	K09663 GCNT4; beta-1,6-N-acetylglucosaminyltransferase 4 [EC:2.4.1.-]	3.082	1.624	No	0.00289044	glucosaminyl (N-acetyl) transferase 4, core 2 [Source:HGNC Symbol;Acc:HGNC:17973]	GCNT4	Q9P109	ENSG00000176928
Organismal Systems	Immune system	Antigen processing and presentation	cathepsin L	K01365 CTSL; cathepsin L [EC:3.4.22.15]	3.082	1.624	No	1.06011e-13	cathepsin L [Source:HGNC Symbol;Acc:HGNC:2537]	CTSL	P07711	ENSG00000135047
Environmental Information Processing	Signal transduction	Hippo signaling pathway	bone morphogenetic protein 2	K21283 BMP2; bone morphogenetic protein 2	3.065	1.616	No	1.06232e-13	bone morphogenetic protein 2 [Source:HGNC Symbol;Acc:HGNC:1069]	BMP2	P12643	ENSG00000125845
Environmental Information Processing	Signal transduction	TGF-beta signaling pathway	bone morphogenetic protein 2	K21283 BMP2; bone morphogenetic protein 2	3.065	1.616	No	1.06232e-13	bone morphogenetic protein 2 [Source:HGNC Symbol;Acc:HGNC:1069]	BMP2	P12643	ENSG00000125845
Environmental Information Processing	Signaling molecules and interaction	Cytokine-cytokine receptor interaction	bone morphogenetic protein 2	K21283 BMP2; bone morphogenetic protein 2	3.065	1.616	No	1.06232e-13	bone morphogenetic protein 2 [Source:HGNC Symbol;Acc:HGNC:1069]	BMP2	P12643	ENSG00000125845
Metabolism	Metabolism of cofactors and vitamins	Ubiquinone and other terpenoid-quinone biosynthesis	NAD(P)H quinone dehydrogenase 1	K00355 NQO1; NAD(P)H dehydrogenase (quinone) [EC:1.6.5.2]	3.066	1.616	No	6.19674e-07	NAD(P)H dehydrogenase, quinone 1 [Source:HGNC Symbol;Acc:HGNC:2874]	NQO1	P15559	ENSG00000181019
Cellular Processes	Cell growth and death	Necroptosis	Z-DNA binding protein 1	K12965 ZBP1; Z-DNA binding protein 1	3.04	1.604	No	0.0222203	Z-DNA binding protein 1 [Source:HGNC Symbol;Acc:HGNC:16176]	ZBP1	Q9H171	ENSG00000124256
Organismal Systems	Immune system	Cytosolic DNA-sensing pathway	Z-DNA binding protein 1	K12965 ZBP1; Z-DNA binding protein 1	3.04	1.604	No	0.0222203	Z-DNA binding protein 1 [Source:HGNC Symbol;Acc:HGNC:16176]	ZBP1	Q9H171	ENSG00000124256
Environmental Information Processing	Membrane transport	ABC transporters	ATP binding cassette subfamily B member 1	K05658 ABCB1; ATP-binding cassette, subfamily B (MDR/TAP), member 1 [EC:7.6.2.2]	3.012	1.591	No	0.0192554	ATP binding cassette subfamily B member 1 [Source:HGNC Symbol;Acc:HGNC:40]	ABCB1	P08183	ENSG00000085563
Organismal Systems	Digestive system	Bile secretion	ATP binding cassette subfamily B member 1	K05658 ABCB1; ATP-binding cassette, subfamily B (MDR/TAP), member 1 [EC:7.6.2.2]	3.012	1.591	No	0.0192554	ATP binding cassette subfamily B member 1 [Source:HGNC Symbol;Acc:HGNC:40]	ABCB1	P08183	ENSG00000085563
Organismal Systems	Endocrine system	Thyroid hormone synthesis	thyroglobulin	K10809 TG; thyroglobulin	3.01	1.59	No	1.70554e-05	thyroglobulin [Source:HGNC Symbol;Acc:HGNC:11764]	TG	P01266	ENSG00000042832
Metabolism	Lipid metabolism	Arachidonic acid metabolism	gamma-glutamyltransferase 5	K18592 GGT1_5; gamma-glutamyltranspeptidase / glutathione hydrolase / leukotriene-C4 hydrolase [EC:2.3.2.2 3.4.19.13 3.4.19.14]	2.997	1.584	No	0.0442477	gamma-glutamyltransferase 5 [Source:HGNC Symbol;Acc:HGNC:4260]	GGT5	P36269	ENSG00000099998
Metabolism	Metabolism of other amino acids	Glutathione metabolism	gamma-glutamyltransferase 5	K18592 GGT1_5; gamma-glutamyltranspeptidase / glutathione hydrolase / leukotriene-C4 hydrolase [EC:2.3.2.2 3.4.19.13 3.4.19.14]	2.997	1.584	No	0.0442477	gamma-glutamyltransferase 5 [Source:HGNC Symbol;Acc:HGNC:4260]	GGT5	P36269	ENSG00000099998
Metabolism	Metabolism of other amino acids	Taurine and hypotaurine metabolism	gamma-glutamyltransferase 5	K18592 GGT1_5; gamma-glutamyltranspeptidase / glutathione hydrolase / leukotriene-C4 hydrolase [EC:2.3.2.2 3.4.19.13 3.4.19.14]	2.997	1.584	No	0.0442477	gamma-glutamyltransferase 5 [Source:HGNC Symbol;Acc:HGNC:4260]	GGT5	P36269	ENSG00000099998
Cellular Processes	Cell growth and death	Ferroptosis	ferritin light chain	K13625 FTL; ferritin light chain	2.995	1.582	No	8.11519e-07	ferritin, light polypeptide [Source:HGNC Symbol;Acc:HGNC:3999]	FTL	P02792	ENSG00000087086
Cellular Processes	Cell growth and death	Necroptosis	ferritin light chain	K13625 FTL; ferritin light chain	2.995	1.582	No	8.11519e-07	ferritin, light polypeptide [Source:HGNC Symbol;Acc:HGNC:3999]	FTL	P02792	ENSG00000087086
Organismal Systems	Digestive system	Mineral absorption	ferritin light chain	K13625 FTL; ferritin light chain	2.995	1.582	No	8.11519e-07	ferritin, light polypeptide [Source:HGNC Symbol;Acc:HGNC:3999]	FTL	P02792	ENSG00000087086
[truncated: 3,066 more rows]

## Sheet: Table S3
Kegg Level 1	Kegg Level 2	KEGG pathway	stat mean	p-value	adj. p-value	Total set size	DEGs	Ratio	DEGs list
[truncated: 34 more rows]

## Sheet: Table S4
Pathway ID	Description	Level 1	Level 2	Level 3	Level 4	Level 5	Total set size	DEGs	Enrichment score	Normalized Enrichment Score	P-value	Adjusted p-value (BH)	q-values (FDR)
[truncated: 70 more rows]

[truncated: 3 more sheets: Table S5, Table S6, Table S7]
